# Supplementary material for: Chiral ion-pair organocatalyst promotes highly enantioselective 3-exo iodo-cycloetherification of allyl alcohols
Source: PubMed Central journal article supplement (PMC5947518; doi:10.1039/c5sc02485d), 2015-08-27
Supplement: SC-006-C5SC02485D-s001.pdf [file SC-006-C5SC02485D-s001.pdf]

Supporting information for

# Chiral Ion-Pair Organocatalyst Promotes Highly Enantioselective 3-exo Iodo-cycloetherification of Allyl Alcohols

Zhigao Shen,<sup>a,b,†</sup> Xixian Pan<sup>c,†</sup> Yisheng Lai,<sup>b,†</sup> Jiadong Hu,<sup>b</sup> Xiaolong Wan,<sup>d</sup> Xiaoge Li,<sup>d</sup> Hui Zhang,<sup>e</sup>  
and Weiqing Xie<sup>a</sup>

## Table of contents

|                                                                                      |      |
|--------------------------------------------------------------------------------------|------|
| 1. General information-----                                                          | S2   |
| 2. Reaction conditions optimization-----                                             | S3   |
| 3. General procedure for preparation of substrates, ammonium salts and catalyst----- | S8   |
| 4. General procedure for asymmetric 3- <i>exo</i> iodo-cycloetherification-----      | S18  |
| 5. Wagner-Meerwein Rearrangement of epoxide and one-pot procedure-----               | S26  |
| 6. References-----                                                                   | S33  |
| 7. Copies of spectra and HPLC reports-----                                           | S34  |
| 8. VCD and IR experimental of <b>2c</b> -----                                        | S176 |
| 9. X-ray crystallography of <b>2ac</b> and <b>4</b> -----                            | S178 |

## 1. General information

Unless otherwise noted, reagents were obtained from commercial sources and used without further purification. Non-aqueous reactions were conducted under an inert atmosphere of nitrogen in flame-dried glassware. Anhydrous solvents were treated as follows: tetrahydrofuran and diethyl ether were distilled from sodium under nitrogen atmosphere, dimethylformamide was distilled over calcium hydride under reduced pressure, and dichloromethane and toluene were distilled from calcium hydride under nitrogen atmosphere. Thin layer chromatography was conducted on Merck 60 F254 pre-coated silica gel plates. Column chromatography was carried out by normal silica gel (40-60  $\mu\text{m}$ , 200-400 mesh, Silicycle P60). NMR data including  $^1\text{H}$  NMR or  $^{13}\text{C}$  NMR spectra were recorded on Agilent 500 and Agilent 400.  $^1\text{H}$  NMR chemical shifts were reported in ppm from the solvent resonance as the internal standard ( $\text{CDCl}_3$ : 7.26 ppm,  $\text{D}_2\text{O}$ : 4.79).  $^{13}\text{C}$  NMR chemical shifts were reported in ppm relative to the solvent ( $\text{CDCl}_3$ : 77 ppm). Infrared spectra were performed on a Nicolet 380FT-IR and are reported in terms of frequency of absorption ( $\text{cm}^{-1}$ ). Low mass spectra were measured on a Shimadzu LCMS-2010EV mass spectrometer (ESI) and Agilent Technologies 5973N (EI). High resolution mass spectra were obtained from IonSpec 4.7 Tesla FTMS mass spectrometer (MALDI), Bruker APEXIII 7.0 TESLA FTMS (ESI) and Waters Micromass GCT Premier (EI).

## 2. Reaction conditions optimization

Table S1. Evaluation of chiral silver phosphate and ammonium salts

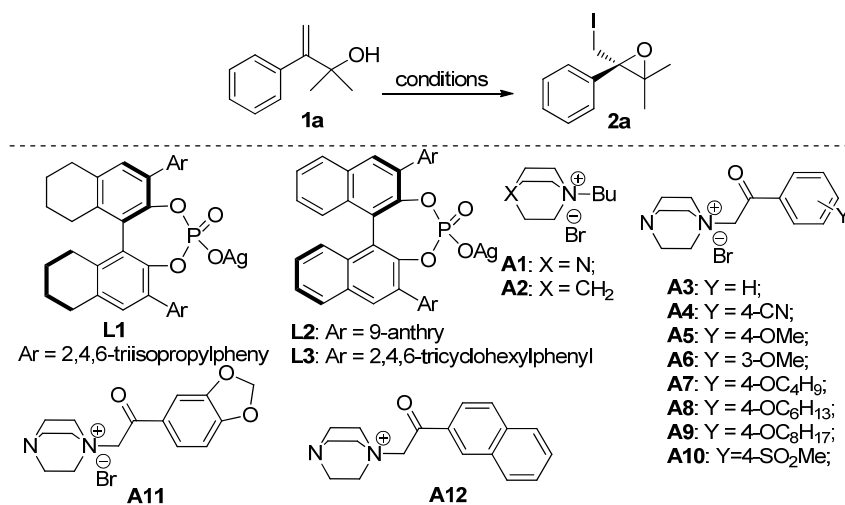

| entry | solvent | silver salt<br>(equiv) | additive<br>(equiv) | yield <sup>a</sup><br>(%) | ee <sup>b</sup><br>(%) |
|-------|---------|------------------------|---------------------|---------------------------|------------------------|
| 1     | DCM     | <b>L1</b> (0.1)        | <b>A1</b> (0.12)    | 16                        | 30                     |
| 2     | DCM     | <b>L1</b> (0.1)        | <b>A2</b> (0.12)    | 18                        | 19                     |
| 3     | DCM     | <b>L1</b> (0.1)        | <b>A3</b> (0.12)    | 44                        | 77                     |
| 4     | DCM     | <b>L1</b> (0.1)        | <b>A4</b> (0.12)    | 16                        | 69                     |
| 5     | DCM     | <b>L1</b> (0.1)        | <b>A5</b> (0.12)    | 69                        | 86                     |
| 6     | DCM     | <b>L1</b> (0.1)        | <b>A6</b> (0.12)    | 47                        | 80                     |
| 7     | DCM     | <b>L1</b> (0.1)        | <b>A7</b> (0.12)    | 65                        | 91                     |
| 8     | DCM     | <b>L1</b> (0.1)        | <b>A8</b> (0.12)    | 60                        | 92                     |
| 9     | DCM     | <b>L1</b> (0.1)        | <b>A9</b> (0.12)    | 50                        | 91                     |
| 10    | DCM     | <b>L1</b> (0.1)        | <b>A10</b> (0.12)   | 21                        | 43                     |
| 11    | DCM     | <b>L1</b> (0.1)        | <b>A11</b> (0.12)   | 61                        | 88                     |
| 12    | DCM     | <b>L1</b> (0.1)        | <b>A12</b> (0.12)   | 65                        | 81                     |
| 13    | DCM     | <b>L2</b> (0.1)        | <b>A8</b> (0.12)    | 30                        | 40                     |
| 14    | DCM     | <b>L3</b> (0.1)        | <b>A8</b> (0.12)    | 62                        | 67                     |
| 15    | DCM     | --                     | --                  | trace                     | ND                     |
| 16    | DCM     | <b>L1</b> (0.1)        | --                  | trace                     | ND                     |
| 17    | DCM     | --                     | <b>A8</b> (0.12)    | trace                     | ND                     |

Reaction conditions: To a mixture of silver salt **L1** (0.01 mmol), ammonium salt **A** (0.012 mmol) and NIS (0.12 mmol) was added DCM (1 mL) then the reaction mixture was cooled to 0 °C. Allyl alcohol **1a** (0.1 mmol) in 0.5 mL DCM was added dropwise and the reaction was quenched after 40 h. <sup>a</sup>Isolated yield. <sup>b</sup>Determined by HPLC using Chiralpak AD column.

**Table S2. Survey of other organocatalysts.**

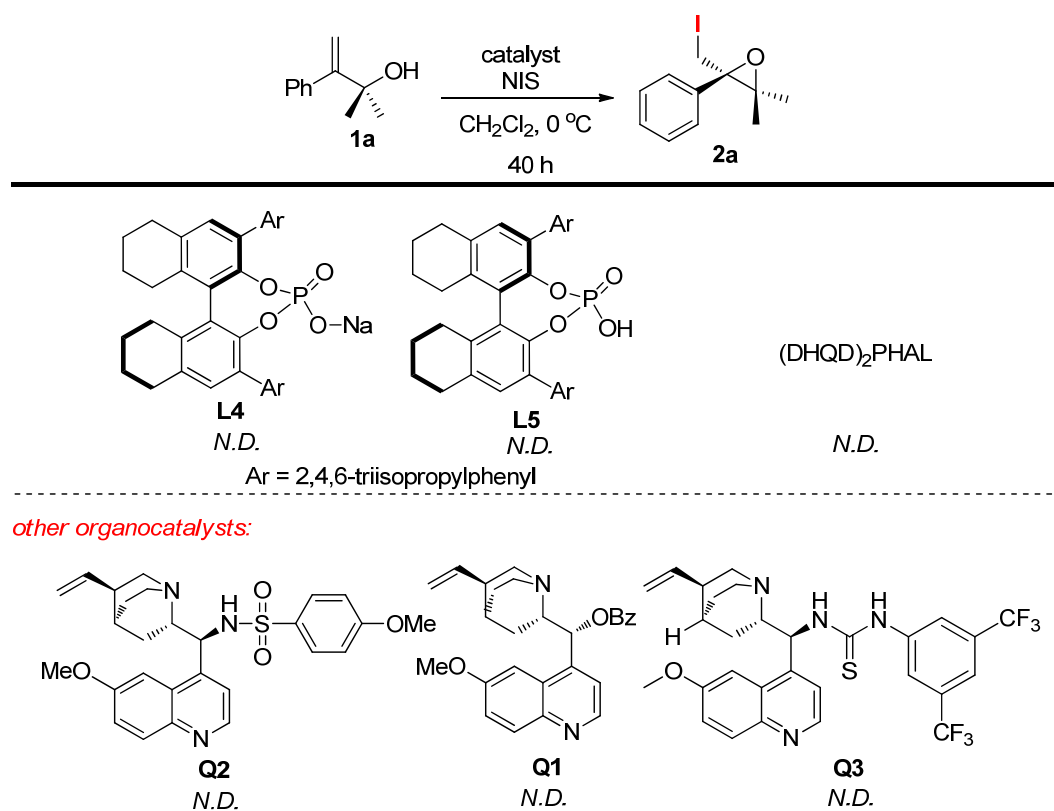

Reaction conditions: To a mixture of catalyst **L1** (0.01 mmol), NIS (0.12 mmol) was added DCM (1 mL) then the reaction mixture was cooled to 0 °C. Allyl alcohol **1a** (0.1 mmol) in 0.5 mL DCM was added dropwise and the reaction was quenched after 40 h.

**Table S3. Screening of halogen sources**

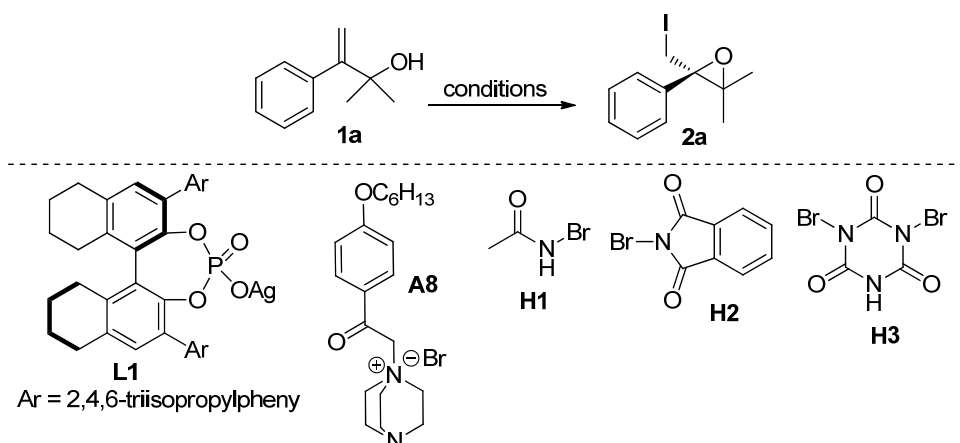

| entry | solvent | silver salt<br>(equiv) | additive<br>(equiv) | halogenating<br>reagent | yield <sup>a</sup><br>(%) | ee <sup>b</sup><br>(%) |
|-------|---------|------------------------|---------------------|-------------------------|---------------------------|------------------------|
| 1     | DCM     | <b>L1</b> (0.1)        | <b>A8</b> (0.12)    | NIS                     | 65                        | 91                     |
| 2     | DCM     | <b>L1</b> (0.1)        | <b>A8</b> (0.12)    | I <sub>2</sub>          | NR                        | --                     |
| 3     | DCM     | <b>L1</b> (0.1)        | <b>A8</b> (0.12)    | NCS                     | NR                        | --                     |
| 4     | DCM     | <b>L1</b> (0.1)        | <b>A8</b> (0.12)    | NBS                     | 15                        | 79                     |
| 5     | DCM     | <b>L1</b> (0.1)        | <b>A8</b> (0.12)    | <b>H1</b>               | 23                        | 8                      |
| 6     | DCM     | <b>L1</b> (0.1)        | <b>A8</b> (0.12)    | <b>H2</b>               | 46                        | 31                     |
| 7     | DCM     | <b>L1</b> (0.1)        | <b>A8</b> (0.12)    | <b>H3</b>               | 68                        | 78                     |

Reaction conditions: To a mixture of silver salt **L1** (0.01 mmol), ammonium salt **A8** (0.012 mmol) and halogenating reagent (0.12 mmol) was added DCM (1 mL) then the reaction mixture was cooled to 0 °C. Allyl alcohol **1a** (0.1 mmol) in 0.5 mL DCM was added dropwise and the reaction was quenched after 40 h. <sup>a</sup>Isolated yield. <sup>b</sup>Determined by HPLC using Chiralpak AD column.

**Table S4. Effects of additive and temperature.**

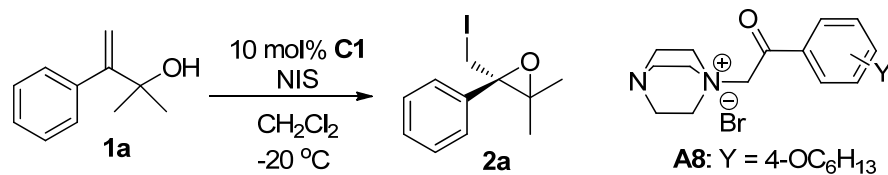

| entry | catalyst<br>(equiv) | additive<br>(equiv)       | T<br>(°C) | t<br>(h) | yield <sup>a</sup><br>(%) | ee <sup>b</sup><br>(%) |
|-------|---------------------|---------------------------|-----------|----------|---------------------------|------------------------|
| 1     | <b>C1</b> (0.1)     | --                        | 0         | 40       | 42                        | 83                     |
| 2     | <b>C1</b> (0.1)     | DABCO (0.1)               | 0         | 40       | 45                        | 84                     |
| 3     | <b>C1</b> (0.1)     | (-)-CSA (0.1)             | 0         | 40       | 38                        | 80                     |
| 4     | <b>C1</b> (0.1)     | Ph <sub>3</sub> P=S (0.1) | 0         | 40       | 63                        | 90                     |
| 5     | <b>C1</b> (0.1)     | <b>A8</b> (0.1)           | 0         | 40       | 82                        | 92                     |
| 6     | <b>C1</b> (0.1)     | <b>A8</b> (0.1)           | -20       | 107      | 99                        | 94                     |
| 8     | <b>C1</b> (0.1)     | <b>A8</b> (0.1)           | -40       | 121      | 83                        | 94                     |

Reaction conditions: To a mixture of silver salt **C1** (0.01 mmol), additive (0.012 mmol) and NIS (0.12 mmol) was added DCM (1 mL) then the reaction mixture was cooled to 0 °C. Allyl alcohol **1a** (0.1 mmol) in 0.5 mL DCM was added dropwise and the reaction was quenched at indicated time.

<sup>a</sup>Isolated yield. <sup>b</sup>Determined by HPLC using Chiralpak AD column.

**Table S5. Screening of solvents.**

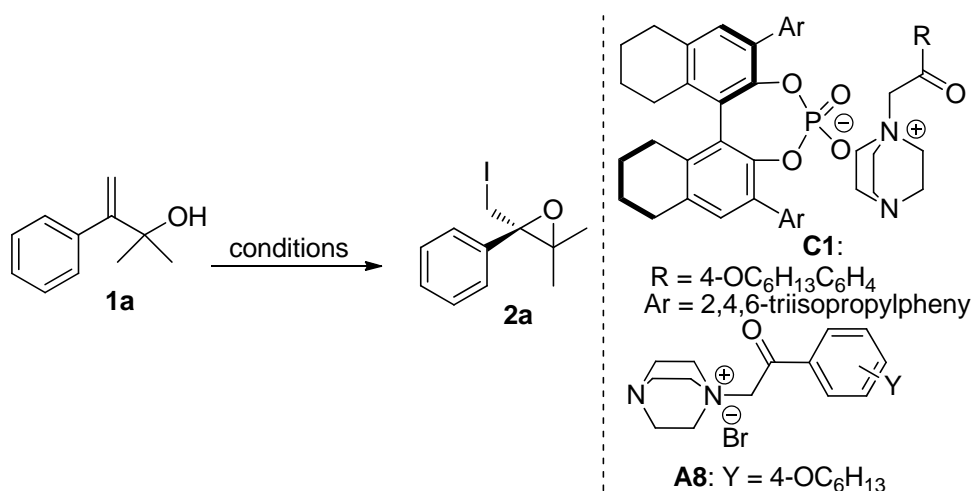

| entry | solvent                         | catalyst<br>(equiv) | additive<br>(equiv) | yield <sup>a</sup><br>(%) | ee <sup>b</sup><br>(%) |
|-------|---------------------------------|---------------------|---------------------|---------------------------|------------------------|
| 1     | CH <sub>2</sub> Cl <sub>2</sub> | <b>C1</b> (0.1)     | <b>A8</b> (0.1)     | 82                        | 92                     |
| 2     | CHCl <sub>3</sub>               | <b>C1</b> (0.1)     | <b>A8</b> (0.1)     | 62                        | 69                     |
| 3     | 1,2-dichoroethane               | <b>C1</b> (0.1)     | <b>A8</b> (0.1)     | 76                        | 19                     |
| 4     | Ethylene dibromide              | <b>C1</b> (0.1)     | <b>A8</b> (0.1)     | 49                        | 55                     |
| 5     | CH <sub>3</sub> CN              | <b>C1</b> (0.1)     | <b>A8</b> (0.1)     | 59                        | 50                     |
| 6     | EtOAc                           | <b>C1</b> (0.1)     | <b>A8</b> (0.1)     | 31                        | 67                     |
| 8     | THF                             | <b>C1</b> (0.1)     | <b>A8</b> (0.1)     | 73                        | 85                     |
| 9     | Hexane                          | <b>C1</b> (0.1)     | <b>A8</b> (0.1)     | 59                        | 50                     |

Reaction conditions: To a mixture of silver salt **L1** (0.01 mmol), additive (0.012 mmol) and NIS (0.12 mmol) was added Solvent (1 mL) then the reaction mixture was cooled to 0 °C. Allyl alcohol **1a** (0.1 mmol) in 0.5 mL DCM was added dropwise and the reaction was quenched after 40 h.

<sup>a</sup>Isolated yield. <sup>b</sup>Determined by HPLC using Chiralpak AD column.

### Proposed transition states for the observed stereoselectivity.

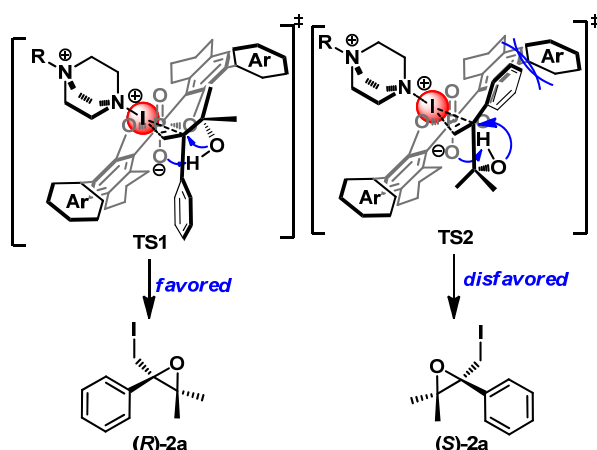

**Figure S1.** Rationale for the Observed Stereoselectivity.

To explain the stereoselectivity of this reaction, putative transition states are proposed based on previous working model for the chiral anionic phase-transfer catalyst (Figure S1).<sup>[1,2]</sup> That is, the iodine of NIS may be first transferred to DABCO moiety of the ion-pair organocatalyst, which may be accelerated by ammonium **A8**. Subsequently, alkene exchanges with one of DABCO-derived ammonium to produce cyclization precursor. In the transition state, chiral phosphate functionalizes as Brønsted base for deprotonation of hydroxyl of allyl alcohol and meanwhile is hold tightly with DABCO-derived ammonium by Columbic interaction. Through these cooperative interactions, substrate and NIS are simultaneously activated by the ion-pair catalyst, which leads to a well-defined transition state for the 3-*exo* iodo-cycloetherification. As shown in Figure S1, iodonium complexing with *Re* face of alkene in **TS1** suffers less steric repulsion between substrate and phosphate than that in **TS2**, which would favorably produce the observed stereoisomer (*R*)-**2a**.



## General procedure for preparation of substrates, ammonium salts and catalyst

### 3.1 General procedure for the synthesis of 2-Aryl-2-propen-1-ol

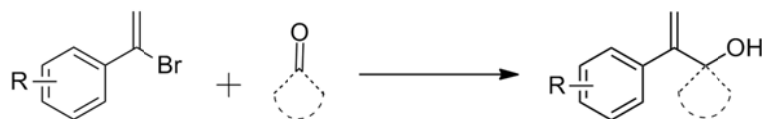

#### General procedure A<sup>[1a]</sup>

To a THF solution (20 ml) of alkene (4 mmol) was added *t*-BuLi (8 mmol) at -78 °C. After stirred at this temperature for 1.5 h, the lithium salt was quenched with ketone (4.8 mmol). The mixture stirred for a further 1h, and slowly warmed to rt. Water (10 ml) was then added, and the organic product extracted with Et<sub>2</sub>O, and dried over anhydrous Na<sub>2</sub>SO<sub>4</sub>. The alcohol were purified by flash column chromatography (ethyl acetate/petroleum ether = 1:25, v/v).

#### General procedure B

A 50 mL two-neck round-bottomed flask equipped with an addition funnel and a condenser was charged with Mg turnings (264 mg, 11 mmol). Anhydrous THF (3 mL) and 1,2-dibromoethane (91 mg, 43 μL, 0.05 mmol) were added via syringe, then the mixture was activated by heat with a hairdryer during which time there were bubbles emerging from the surface of Mg turnings. After stirring at rt for 0.5 min, corresponding alkene (10 mmol) in anhydrous THF (10 mL) was then added dropwise over 0.5 h via the addition funnel, during which time a significant exotherm was observed. The reaction was then placed in an oil bath and heated at reflux for 2h. At which time, ketone (11 mmol) was added. After further stirring for 1.5 h at reflux, saturated NH<sub>4</sub>Cl (aq.) (5 mL) was added. The organic layer was extracted with ethyl acetate and washed with brine, separated, dried over Na<sub>2</sub>SO<sub>4</sub>, filtered and then concentrated. The residue was purified by silica gel column chromatography (ethyl acetate/petroleum ether = 1:25, v/v) to afford the product.

#### General procedure C<sup>[1b]</sup>

Into a flame-dried 50 mL round-bottomed flask was added dry THF (15 mL) under a nitrogen atmosphere. After cooling to -78 °C (acetone/dry-ice bath), *n*-BuLi (8.3 mL, 2.5 M in hexane, 20.5 mmol) and dry CH<sub>3</sub>CN (550 μL, 10.5 mmol) were slowly added respectively. After stirring for 20 min, aryl epoxide (10 mmol) was then added. The reaction mixture was gradually warmed up to room temperature overnight and quenched with saturated NaHCO<sub>3</sub> (15 mL). After the phase separation, the aqueous layer was extracted with Et<sub>2</sub>O. The combined organics were washed with brine, dried over Na<sub>2</sub>SO<sub>4</sub>, and concentrated under reduced pressure. The crude product was purified by column chromatography (ethyl acetate/petroleum ether = 1:25, v/v).

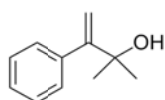

#### 2-Methyl-3-phenylbut-3-en-2-ol (1a)

**1a**, a known compound<sup>[1b]</sup>, was prepared following the general procedure A by using acetone and  $\alpha$ -bromostyrene as a colorless liquid (1.13 g, 61% yield on 11.4 mmol scale).

Analytical data for **1a**: <sup>1</sup>H NMR (500 MHz, CDCl<sub>3</sub>)  $\delta$  7.33-7.27 (m, 5H), 5.46 (d, *J* = 1.0 Hz, 1H), 4.99

(d,  $J = 1.0$  Hz, 1H), 2.12 (brs, 1H), 1.44 (s, 6H);  $^{13}\text{C}$  NMR (126 MHz,  $\text{CDCl}_3$ )  $\delta$  157.1, 141.6, 128.9, 127.8, 127.0, 112.6, 73.0, 29.7; IR (film) 3388, 915, 703  $\text{cm}^{-1}$ ; HRMS(EI+) exact mass calcd. for  $\text{C}_{11}\text{H}_{14}\text{O}$  requires  $m/z$   $[\text{M}]^+$ : 162.1045. Found  $m/z$  162.1047.

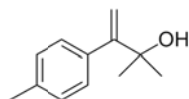

### 2-Methyl-3-p-tolyl-but-3-en-2-ol (1aa)

**1aa**, a known compound<sup>[1a]</sup>, was prepared following the general procedure A by using acetone and 1-(1-bromovinyl)-4-methylbenzene as a yellow liquid (454 mg, 60% yield on 4.3 mmol scale).

Analytical data for **1aa**:  $^1\text{H}$  NMR (500 MHz,  $\text{CDCl}_3$ )  $\delta$  7.20 (d,  $J = 10.0$  Hz, 1H), 7.13 (d,  $J = 10.0$  Hz, 2H), 5.41 (d,  $J = 1.0$  Hz, 1H), 4.96 (d,  $J = 1.0$  Hz, 1H), 2.36 (s, 3H), 1.66 (brs, 1H), 1.42 (s, 6H);  $^{13}\text{C}$  NMR (126 MHz,  $\text{CDCl}_3$ )  $\delta$  157.0, 138.5, 136.7, 128.7, 128.5, 112.3, 73.1, 29.7, 21.1; IR (film) 3393, 2976, 910, 792  $\text{cm}^{-1}$ ; HRMS(EI+) exact mass calcd. for  $\text{C}_{12}\text{H}_{16}\text{O}$  requires  $m/z$  176.1201. Found  $m/z$  176.1202.

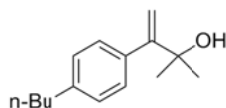

### 3-(4-Butyl-phenyl)-2-methyl-but-3-en-2-ol (1ab)

**1ab** was prepared following the general procedure A by using acetone and 1-(1-bromovinyl)-4-butylbenzene as a yellow liquid (417 mg, 49% yield on 3.9 mmol scale).

Analytical data for **1ab**:  $^1\text{H}$  NMR (500 MHz,  $\text{CDCl}_3$ )  $\delta$  7.21 (d,  $J = 7.5$  Hz, 2 H), 7.13 (d,  $J = 7.5$  Hz, 2 H), 5.10 (d,  $J = 1.5$  Hz, 1H), 4.96 (d,  $J = 1.5$  Hz, 1H), 2.61 (t,  $J = 7.5$  Hz, 2 H), 1.66 (brs, 1 H), 1.65-1.58 (m, 2 H), 1.41 (s, 6 H), 1.40-1.34 (m, 2 H), 0.94 (t,  $J = 7.5$  Hz, 3 H);  $^{13}\text{C}$  NMR (126 MHz,  $\text{CDCl}_3$ )  $\delta$  157.0, 141.7, 138.6, 128.7, 127.8, 112.3, 73.1, 35.3, 33.6, 29.7, 22.4, 14.0; IR (film) 3392, 2929, 1177, 913, 839  $\text{cm}^{-1}$ ; HRMS(ESI+) exact mass calcd for  $\text{C}_{15}\text{H}_{22}\text{NaO}_1$  requires  $m/z$   $[\text{M}+\text{Na}]^+$ : 241.1563. Found  $m/z$  241.1553.

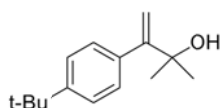

### 3-(4-tert-Butyl-phenyl)-2-methyl-but-3-en-2-ol (1ac)

**1ac** was prepared following the general procedure B by using acetone and 1-(1-bromovinyl)-4-(tert-butyl)benzene as a pale yellow solid (412 mg, 42% yield on 4.5 mmol scale).

Analytical data for **1ac**:  $^1\text{H}$  NMR (500 MHz,  $\text{CDCl}_3$ )  $\delta$  7.32 (d,  $J = 7.5$  Hz, 2H), 7.23 (d,  $J = 7.5$  Hz, 2H), 5.39 (d,  $J = 1.5$  Hz, 1H), 4.97 (d,  $J = 1.5$  Hz, 1H), 1.63 (brs, 1H), 1.42 (s, 6H), 1.33 (s, 9H);  $^{13}\text{C}$  NMR (126 MHz,  $\text{CDCl}_3$ )  $\delta$  156.9, 149.9, 138.3, 128.5, 124.7, 112.3, 73.1, 34.5, 31.4, 29.7; IR (film) 3398, 1508, 913, 838  $\text{cm}^{-1}$ ; HRMS(ESI+) exact mass calcd for  $\text{C}_{15}\text{H}_{22}\text{NaO}_1$  requires  $m/z$   $[\text{M}+\text{Na}]^+$ : 241.1563. Found  $m/z$  241.1557.

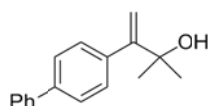

### 3-Biphenyl-4-yl-2-methyl-but-3-en-2-ol (1ad)

**1ad** was prepared following the general procedure B by using acetone and 4-(1-bromovinyl)-1,1'-biphenyl as a pale yellow solid (324 mg, 34% yield on 4.0 mmol scale).

Analytical data for **1ad**:  $^1\text{H}$  NMR (500 MHz,  $\text{CDCl}_3$ )  $\delta$  7.62 (d,  $J = 8.0$  Hz, 2H), 7.56 (d,  $J = 8.0$  Hz,

2H), 7.46 (t,  $J = 7.5$  Hz, 2H), 7.41 (d,  $J = 8.0$  Hz, 2H), 7.36 (t,  $J = 7.5$  Hz, 1H), 5.47 (s, 1H), 5.05 (s, 1H), 1.70 (brs, 1H), 1.47 (s, 6H);  $^{13}\text{C}$  NMR (126 MHz,  $\text{CDCl}_3$ )  $\delta$  156.7, 140.8, 140.5, 139.9, 129.3, 128.79, 128.78, 127.3, 127.0, 126.5, 112.7, 73.1, 29.8; IR (film) 3394, 917, 851  $\text{cm}^{-1}$ ; HRMS(EI+) exact mass calcd for  $\text{C}_{17}\text{H}_{18}\text{O}$  requires  $m/z$   $[\text{M}]^+$ : 238.1358. Found  $m/z$  238.1360.

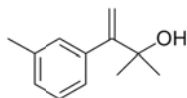

### 2-Methyl-3-m-tolyl-but-3-en-2-ol (1ae)

**1ae** was prepared following the general procedure B by using acetone and 1-(1-bromovinyl)-3-methylbenzene as a pale yellow liquid (221 mg, 37% yield on 3.4 mmol scale).

Analytical data for **1ae**:  $^1\text{H}$  NMR (500 MHz,  $\text{CDCl}_3$ )  $\delta$  7.21 (t,  $J = 7.5$  Hz, 1H), 7.12-7.10 (m, 3H), 5.42 (s, 1H), 4.96 (s, 1H), 2.37 (s, 3H), 1.76 (brs, 1H), 1.43 (s, 6H);  $^{13}\text{C}$  NMR (126 MHz,  $\text{CDCl}_3$ )  $\delta$  157.2, 141.4, 137.3, 129.6, 127.8, 127.7, 125.9, 112.3, 73.0, 29.7, 21.5; IR (film) 3387, 911, 837  $\text{cm}^{-1}$ ; HRMS(EI+) exact mass calcd for  $\text{C}_{12}\text{H}_{16}\text{O}$  requires  $m/z$   $[\text{M}]^+$ : 176.1201. Found  $m/z$ : 176.1202.

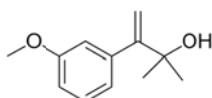

### 3-(3-Methoxy-phenyl)-2-methyl-but-3-en-2-ol (1af)

**1af**, a known compound<sup>[1a]</sup>, was prepared following the general procedure A by using acetone and 1-(1-bromovinyl)-3-methoxybenzene as a pale yellow liquid (438 mg, 57% yield on 4.0 mmol scale).

Analytical data for **1af**:  $^1\text{H}$  NMR (500 MHz,  $\text{CDCl}_3$ )  $\delta$  7.21-7.24 (t,  $J = 8.0$  Hz, 1H), 6.83-6.89 (m, 3H), 5.42 (s, 1H), 4.98 (s, 1H), 3.81 (s, 3H), 1.68 (brs, 1H), 1.42 (s, 6H);  $^{13}\text{C}$  NMR (500 MHz,  $\text{CDCl}_3$ )  $\delta$  156.9, 156.0, 142.9, 128.8, 121.3, 114.8, 112.5, 112.3, 73.0, 55.2, 29.7; IR (film) 3402, 911, 832  $\text{cm}^{-1}$ ; HRMS (ESI+) exact mass calcd for  $\text{C}_{12}\text{H}_{16}\text{NaO}_2$  requires  $m/z$   $[\text{M}+\text{Na}]^+$ : 215.1043. Found  $m/z$  215.1042.

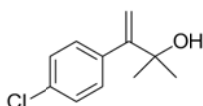

### 3-(4-Chloro-phenyl)-2-methyl-but-3-en-2-ol (1ag)

**1ag**, a known compound<sup>[1a]</sup>, was prepared following the general procedure B by using acetone and 1-(1-bromovinyl)-4-chlorobenzene as a pale yellow liquid (227 mg, 36% yield on 3.2 mmol scale).

Analytical data for **1ag**:  $^1\text{H}$  NMR (500 MHz,  $\text{CDCl}_3$ )  $\delta$  7.129-7.24 (m, 4H), 5.43 (d,  $J = 1.0$  Hz, 1H), 4.97 (d,  $J = 1.0$  Hz, 1H), 1.64 (brs, 1H), 1.40 (s, 6H);  $^{13}\text{C}$  NMR (126 MHz,  $\text{CDCl}_3$ )  $\delta$  155.8, 139.9, 133.0, 130.2, 127.9, 113.2, 72.9, 29.6; IR (film) 3392, 2978, 1560, 920, 790  $\text{cm}^{-1}$ ; HRMS(EI+) exact mass calcd for  $\text{C}_{11}\text{H}_{13}\text{OCl}$  requires  $m/z$   $[\text{M}]^+$ : 196.0655. Found  $m/z$  196.0653.

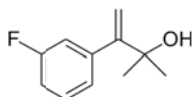

### 3-(3-Fluoro-phenyl)-2-methyl-but-3-en-2-ol (1ah)

**1ah** was prepared following the general procedure B by using acetone and 1-(1-bromovinyl)-3-fluorobenzene as a pale yellow liquid (173 mg, 26% yield on 3.7 mmol).

Analytical data for **1ah**:  $^1\text{H}$  NMR (500 MHz,  $\text{CDCl}_3$ )  $\delta$  7.27 (q,  $J = 8.5$  Hz, 1H), 7.11-7.04 (m, 2H), 6.98 (td,  $J = 8.5, 2.5$  Hz, 1H), 5.44 (s, 1H), 5.00 (s, 1H), 1.65 (brs, 1H), 1.41 (s, 6H);  $^{13}\text{C}$  NMR (126 MHz,  $\text{CDCl}_3$ )  $\delta$  162.1 (d,  $J = 247.0$  Hz), 155.8, 143.7 (d,  $J = 8.8$  Hz),

129.2 (d,  $J = 8.8$  Hz), 124.5 (d,  $J = 2.5$  Hz), 115.9 (d,  $J = 21.4$  Hz), 113.9 (d,  $J = 21.4$  Hz), 113.2, 72.9, 29.6;  $^{19}\text{F}$  NMR (376 MHz,  $\text{CDCl}_3$ )  $\delta$  -113.84--113.90 (m); IR (film) 3396, 2961, 1223, 841  $\text{cm}^{-1}$ ; HRMS(EI+) exact mass calcd for  $\text{C}_{11}\text{H}_{13}\text{FO}$  requires  $m/z$   $[\text{M}]^+$ : 180.0950. Found  $m/z$ : 180.0949.

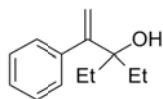

### 3-ethyl-2-phenylpent-1-en-3-ol (1b)

**1b**, a known compound<sup>[1c]</sup>, was prepared following the general procedure A by using 3-pentanone and  $\alpha$ -bromostyrene as a colorless liquid (504 mg, 53% yield on 5.0 mmol scale).

Analytical data for **1b**:  $^1\text{H}$  NMR (500 MHz,  $\text{CDCl}_3$ )  $\delta$  7.32-7.29 (m, 3H), 7.27-7.25 (m, 2H), 5.39 (d,  $J = 1.0$  Hz, 1H), 5.14 (d,  $J = 1.0$  Hz, 1H), 1.72-1.67 (m, 2H), 1.66-1.60 (m, 2H), 1.50 (brs, 1H), 0.95 (t,  $J = 7.5$  Hz, 6H);  $^{13}\text{C}$  NMR (126 MHz,  $\text{CDCl}_3$ )  $\delta$  153.7, 141.8, 128.4, 127.8, 127.0, 115.4, 78.1, 31.9, 7.8; IR (film) 3407, 906, 832  $\text{cm}^{-1}$ ; HRMS(EI+) exact mass calcd for  $\text{C}_{13}\text{H}_{18}\text{O}$  requires  $m/z$   $[\text{M}+\text{Na}]^+$ : 190.1358. Found  $m/z$  190.1354.

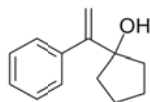

### 1-(1-Phenyl-vinyl)-cyclopentanol (1c)

**1c**, a known compound<sup>[1d]</sup>, was prepared following the general procedure B by using cyclopentanone and  $\alpha$ -bromostyrene as a colorless liquid (4.29 g, 76% yield on 30 mmol scale).

Analytical data for **1c**:  $^1\text{H}$  NMR (500 MHz,  $\text{CDCl}_3$ )  $\delta$  7.41 (d,  $J = 5.0$  Hz, 2H), 7.34-7.28 (m, 3H), 5.45 (s, 1H), 5.09 (s, 1H), 1.92-1.85 (m, 4H), 1.82-1.79 (m, 2H), 1.74-1.66 (m, 3H);  $^{13}\text{C}$  NMR (126 MHz,  $\text{CDCl}_3$ )  $\delta$  154.9, 141.8, 128.5, 127.8, 127.1, 113.2, 84.1, 39.2, 23.3; IR (film) 3388, 915, 703  $\text{cm}^{-1}$ ; HRMS(ESI+) exact mass calcd for  $\text{C}_{15}\text{H}_{20}\text{NaO}$  requires  $m/z$   $[\text{M}+\text{Na}]^+$ : 239.1406. Found  $m/z$  239.1398.

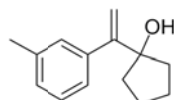

### 1-(1-(m-tolyl)vinyl)cyclopentanol (1ca)

**1ca** was prepared following the general procedure B by using cyclopentanone and 1-(1-bromovinyl)-3-methylbenzene as a yellow liquid (286 mg, 41% yield on 3.2 mmol scale).

Analytical data for **1ca**:  $^1\text{H}$  NMR (500 MHz,  $\text{CDCl}_3$ )  $\delta$  7.22-7.17 (m, 3H), 7.10 (d,  $J = 10.0$  Hz, 1H), 5.41 (d,  $J = 1.0$  Hz, 1H), 5.05 (d,  $J = 1.0$  Hz, 1H), 2.36 (s, 3H), 1.90-1.84 (m, 4H), 1.80-1.78 (m, 2H), 1.70-1.68 (m, 2H), 1.47 (brs, 1H);  $^{13}\text{C}$  NMR (126 MHz,  $\text{CDCl}_3$ )  $\delta$  155.0, 141.6, 137.4, 129.2, 127.8, 127.7, 125.5, 113.0, 84.1, 39.2, 23.28, 23.27, 21.5; IR (film) 3420, 1601, 949, 911  $\text{cm}^{-1}$ ; HRMS(EI+) exact mass calcd for  $\text{C}_{14}\text{H}_{18}\text{O}$  requires  $m/z$   $[\text{M}]^+$ : 202.1358. Found  $m/z$  202.1359.

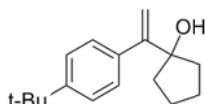

### 1-(1-(4-(tert-butyl)phenyl)vinyl)cyclopentanol (1cb)

**1cb** was prepared following the general procedure B by using cyclopentanone and 1-(1-bromovinyl)-4-(tert-butyl)benzene as a colorless liquid (708 mg, 63% yield on 4.6 mmol scale).

Analytical data for **1cb**:  $^1\text{H}$  NMR (500 MHz,  $\text{CDCl}_3$ )  $\delta$  7.35 (d,  $J = 1.0$  Hz, 4H), 5.42 (d,  $J = 1.0$  Hz, 1H), 5.09 (s,  $J = 1.0$  Hz, 1H), 1.93-1.87 (m, 4H), 1.84-1.81 (m, 2H), 1.72-1.70 (m, 2H), 1.36 (s, 9H);  $^{13}\text{C}$  NMR (126 MHz,  $\text{CDCl}_3$ )  $\delta$  154.8, 149.9, 138.7, 128.2, 124.7, 112.9, 84.2, 39.3, 34.5, 31.4, 23.4; IR

(film) 3458, 999, 842  $\text{cm}^{-1}$ ; HRMS(EI+) exact mass calcd for  $\text{C}_{17}\text{H}_{24}\text{O}$  requires  $m/z$   $[\text{M}]^+$ : 244.1827. Found  $m/z$  244.1830.

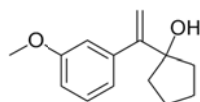

#### 1-(1-(3-methoxyphenyl)vinyl)cyclopentanol (**1cc**)

**1cc** was prepared following the general procedure **B** by using cyclopentanone and 1-(1-bromovinyl)-3-methylbenzene as a yellow liquid (465 mg, 41% yield on 5.2 mmol scale).

Analytical data for **1cc**:  $^1\text{H}$  NMR (500 MHz,  $\text{CDCl}_3$ )  $\delta$  7.24-7.21 (m, 1H), 6.97-6.94 (m, 2H), 6.83 (d,  $J$  = 10.0 Hz, 1H), 5.42 (s, 1H), 5.08 (s, 1H), 3.81 (s, 3H), 1.89-1.84 (m, 4H), 1.80-1.77 (m, 2H), 1.70-1.65 (m, 2H), 1.49 (brs, 1H);  $^{13}\text{C}$  NMR (126 MHz,  $\text{CDCl}_3$ )  $\delta$  159.0, 154.7, 143.2, 128.8, 121.0, 114.4, 113.2, 112.4, 84.0, 55.2, 39.2, 23.3; IR (film) 3420, 1601, 949, 911  $\text{cm}^{-1}$ ; HRMS(EI+) exact mass calcd for  $\text{C}_{14}\text{H}_{18}\text{O}_2$  requires  $m/z$   $[\text{M}]^+$ : 218.1307. Found  $m/z$  218.1309.

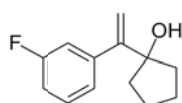

#### 1-(1-(3-fluorophenyl)vinyl)cyclopentanol (**1cd**)

**1cd** was prepared following the general procedure **B** by using cyclopentanone and 1-(1-bromovinyl)-3-fluorobenzene as a yellow liquid (195 mg, 27% yield on 3.5 mmol scale).

Analytical data for **1cd**:  $^1\text{H}$  NMR (500 MHz,  $\text{CDCl}_3$ )  $\delta$  7.28-7.23 (m, 1H), 7.17-7.12 (m, 2H), 6.70 (t,  $J$  = 12.5 Hz, 1H), 5.43 (s, 1H), 5.09 (s, 1H), 1.89-1.78 (m, 6H), 1.74-1.68 (m, 2H), 1.42 (brs, 1H);  $^{13}\text{C}$  NMR (126 MHz,  $\text{CDCl}_3$ )  $\delta$  162.34 (d,  $J$  = 244.5 Hz), 153.7 (d,  $J$  = 1.9 Hz), 143.9 (d,  $J$  = 7.6 Hz), 129.2 (d,  $J$  = 8.5 Hz), 124.1 (d,  $J$  = 2.9 Hz), 115.5 (d,  $J$  = 20.9 Hz), 114.0 (d,  $J$  = 6.6 Hz), 113.8, 83.9, 39.1, 23.2;  $^{19}\text{F}$  NMR (376MHz,  $\text{CDCl}_3$ )  $\delta$  -113.78--113.85 (m); IR (film) 3447, 1508, 836  $\text{cm}^{-1}$ ; HRMS(EI+) exact mass calcd for  $\text{C}_{13}\text{H}_{15}\text{OF}$  requires  $m/z$   $[\text{M}]^+$ : 206.1107. Found  $m/z$  206.1103.

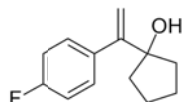

#### 1-(1-(4-fluorophenyl)vinyl)cyclopentanol (**1ce**)

**1ce** was prepared following the general procedure **B** by using cyclopentanone and 1-(1-bromovinyl)-4-fluorobenzene as a yellow liquid (286 mg, 42% yield on 3.3 mmol scale).

Analytical data for **1ce**:  $^1\text{H}$  NMR (500 MHz,  $\text{CDCl}_3$ )  $\delta$  7.39-7.35 (m, 2H), 7.01-6.96 (m, 2H), 5.41 (d,  $J$  = 1.0 Hz 1H), 5.06 (d,  $J$  = 1.0 Hz 1H), 1.90-1.74 (m, 6H), 1.71-1.67 (m, 2H), 1.50 (brs, 1H);  $^{13}\text{C}$  NMR (126 MHz,  $\text{CDCl}_3$ )  $\delta$  162.1 (d,  $J$  = 244.7 Hz), 153.8, 137.6 (d,  $J$  = 3.8 Hz), 130.0 (d,  $J$  = 7.6 Hz), 114.6 (d,  $J$  = 9.2 Hz), 113.5, 84.1, 39.1, 23.2;  $^{19}\text{F}$  NMR (376MHz,  $\text{CDCl}_3$ )  $\delta$  -115.78--115.84; IR (film) 3397, 915, 841  $\text{cm}^{-1}$ ; HRMS(EI+) exact mass calcd for  $\text{C}_{13}\text{H}_{15}\text{OF}$  requires  $m/z$   $[\text{M}]^+$ : 206.1107. Found  $m/z$  206.1104.

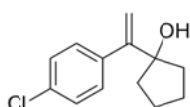

#### 1-(1-(4-chlorophenyl)vinyl)cyclopentanol (**1cf**)

**1cf** was prepared following the general procedure **B** by using cyclopentanone and 1-(1-bromovinyl)-4-chlorobenzene as a yellow liquid (248 mg, 31% yield on 3.6 mmol scale).

Analytical data for **1cf**:  $^1\text{H}$  NMR (500 MHz,  $\text{CDCl}_3$ )  $\delta$  7.34-7.32 (m, 2H), 7.27-7.25 (m, 2H), 5.41 (d,  $J$

= 1.0 Hz, 1H), 5.06 (d,  $J = 1.0$  Hz, 1H), 1.88-1.74 (m, 6H), 1.68-1.65 (m, 2H), 1.50 (brs, 1H);  $^{13}\text{C}$  NMR (126 MHz,  $\text{CDCl}_3$ )  $\delta$  153.7, 140.2, 133.0, 129.8, 128.0, 113.8, 84.0, 39.1, 23.2; IR (film) 3398, 952, 861  $\text{cm}^{-1}$ ; HRMS(EI+) exact mass calcd for  $\text{C}_{13}\text{H}_{15}\text{OCl}$  requires  $m/z$   $[\text{M}]^+$ : 222.0811. Found  $m/z$  222.0812.

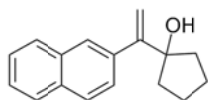

#### 1-(1-(naphthalen-2-yl)vinyl)cyclopentanol (**1cg**)

**1cg** was prepared following the general procedure **B** by using cycloheptanone and 2-(1-bromovinyl)naphthalene as a yellow liquid (297 mg, 39% yield on 3.2 mmol scale).

Analytical data for **1cg**:  $^1\text{H}$  NMR (500 MHz,  $\text{CDCl}_3$ )  $\delta$  7.86 (s, 1H), 7.83 (d,  $J = 7.5$  Hz, 2H), 7.79 (d,  $J = 7.5$  Hz, 1H), 7.56 (d,  $J = 10.0$  Hz, 1H), 7.49-7.47 (m, 2H), 5.52 (s, 1H), 5.20 (s, 1H), 1.94-1.84 (m, 6H), 1.73-1.70 (m, 2H), 1.64 (brs, 1H);  $^{13}\text{C}$  NMR (126 MHz,  $\text{CDCl}_3$ )  $\delta$  154.9, 139.3, 133.1, 132.5, 128.1, 127.5, 127.2, 127.07, 127.05, 126.06, 125.8, 113.7, 84.3, 39.3, 23.3; IR (film) 3435, 951, 899  $\text{cm}^{-1}$ ; HRMS (EI+) exact mass calcd for  $\text{C}_{17}\text{H}_{18}\text{O}$  requires  $m/z$   $[\text{M}]^+$ : 238.1358. Found  $m/z$  238.1362.

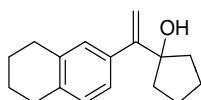

#### 1-(1-(5,6,7,8-tetrahydronaphthalen-2-yl)vinyl)cyclopentanol (**1ch**)

**1ch** was prepared following the general procedure **B** by using cycloheptanone and 6-(1-bromovinyl)-1,2,3,4-tetrahydronaphthalene as a yellow liquid (387 mg, 47% yield on 3.4 mmol scale).

Analytical data for **1ch**:  $^1\text{H}$  NMR (500 MHz,  $\text{CDCl}_3$ )  $\delta$  7.09 (d,  $J = 7.5$  Hz, 2H), 7.07 (s, 1.0H), 7.01 (d,  $J = 7.5$  Hz, 1H), 5.38 (s, 1H), 5.04 (s, 1H), 2.76 (m, 4H), 1.91-1.84 (m, 4H), 1.81-1.78 (m, 6H), 1.71-1.66 (m, 2H), 1.62 (brs, 1H);  $^{13}\text{C}$  NMR (126 MHz,  $\text{CDCl}_3$ )  $\delta$  154.9, 138.8, 136.5, 136.0, 129.1, 128.5, 125.6, 112.7, 84.1, 39.3, 29.5, 29.1, 23.3, 23.2; IR (film) 3425, 952, 879  $\text{cm}^{-1}$ ; HRMS (EI+) exact mass calcd for  $\text{C}_{17}\text{H}_{22}\text{O}$  requires  $m/z$   $[\text{M}]^+$ : 242.1671. Found  $m/z$  242.1672.

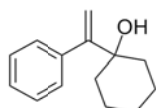

#### 1-(1-Phenyl-vinyl)-cyclohexanol (**1d**)

**1d**, a known compound<sup>[1e]</sup>, was prepared following the general procedure **B** by using cyclohexanone and  $\alpha$ -bromostyrene as a pale yellow liquid (2.10 g, 52% yield on 20.0 mmol scale).

Analytical data for **1d**:  $^1\text{H}$  NMR (500 MHz,  $\text{CDCl}_3$ )  $\delta$  7.31-7.27 (m, 5H), 5.43 (d,  $J = 5.0$  Hz, 1H), 5.02 (d,  $J = 5.0$  Hz, 1H), 1.69-1.56 (m, 8H), 1.53-1.50 (m, 2H), 1.44 (brs, 1H);  $^{13}\text{C}$  NMR (126 MHz,  $\text{CDCl}_3$ )  $\delta$  156.7, 141.6, 129.0, 127.7, 126.9, 113.4, 73.6, 36.7, 25.5, 22.1; IR (film) 3388, 915, 703  $\text{cm}^{-1}$ ; HRMS(EI+) exact mass calcd for  $\text{C}_{14}\text{H}_{18}\text{O}$  requires  $m/z$   $[\text{M}]^+$ : 202.1358. Found  $m/z$  202.1354.

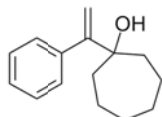

#### 1-(1-Phenyl-vinyl)-cycloheptanol (**1e**)

**1e** was prepared following the general procedure **B** by using cycloheptanone and  $\alpha$ -bromostyrene in 56% yield as a yellow liquid (1.22 g, 56% yield on 1.0 mmol scale).

Analytical data for **1e**:  $^1\text{H}$  NMR (500 MHz,  $\text{CDCl}_3$ )  $\delta$  7.32-7.29 (m, 5H), 5.40 (d,  $J = 1.0$  Hz, 1H), 4.97 (d,  $J = 1.0$  Hz, 1H), 1.99-1.94 (m, 2H), 1.99-1.94 (m, 2H), 1.79-1.74 (m, 2H), 1.67-1.61 (m, 4H),

1.56 (brs, 1H), 1.50-1.47 (m, 2H), 1.44-1.40 (m, 2H);  $^{13}\text{C}$  NMR (126 MHz,  $\text{CDCl}_3$ )  $\delta$  157.6, 141.8, 129.1, 127.7, 126.9, 112.7, 77.5, 40.6, 29.2, 22.4; IR (film) 3421, 973, 702  $\text{cm}^{-1}$ ; HRMS(EI+) exact mass calcd for  $\text{C}_{15}\text{H}_{20}\text{O}$  requires  $m/z$   $[\text{M}]^+$ : 216.1514. Found  $m/z$  216.1512.

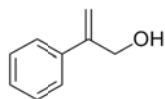

### 2-phenylprop-2-en-1-ol (1f)

**1f** was prepared following the general procedure **C** by using 2-phenyloxirane as a yellow liquid (684 mg, 51% yield on 10 mmol scale).

Analytical data for **1f**:  $^1\text{H}$  NMR (500 MHz,  $\text{CDCl}_3$ )  $\delta$  7.45 (d,  $J = 8.0$  Hz, 2H), 7.36 (t,  $J = 8.0$  Hz, 2H), 7.31 (t,  $J = 8.0$  Hz, 1H), 5.48 (s, 1H), 5.36 (s, 1H), 4.55 (s, 2H), 1.79 (brs, 1H);  $^{13}\text{C}$  NMR (126 MHz,  $\text{CDCl}_3$ )  $\delta$  147.3, 138.5, 128.5, 127.9, 126.1, 112.6, 65.0; IR (film) 3367, 961, 715  $\text{cm}^{-1}$ ; HRMS(EI+) exact mass calcd for  $\text{C}_9\text{H}_{10}\text{O}$  requires  $m/z$   $[\text{M}]^+$ : 134.0732 Found  $m/z$  134.0729.

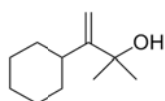

### 3-cyclohexyl-2-methylbut-3-en-2-ol (1g)

**1g**, a known compound<sup>[1a]</sup>, was prepared following the general procedure **A** by using acetone and (1-bromovinyl)cyclohexane as a colorless liquid (309 mg, 46% yield on 4.0 mmol scale).

Analytical data for **1g**:  $^1\text{H}$  NMR (500 MHz,  $\text{CDCl}_3$ )  $\delta$  5.11 (s, 1H), 4.80 (s, 1H), 2.01 (t,  $J = 11.5$  Hz, 1H), 1.75-1.67(m, 5H), 1.55 (brs, 1H), 1.33 (s, 6H), 1.30-1.18 (m, 5H);  $^{13}\text{C}$  NMR (126 MHz,  $\text{cdcl}_3$ )  $\delta$  162.2, 105.7, 73.8, 39.7, 35.5, 28.8, 27.1, 26.2; IR (film) 3401, 2874, 881  $\text{cm}^{-1}$ ; HRMS(EI+) exact mass calcd for  $\text{C}_{11}\text{H}_{20}\text{O}$  requires  $m/z$   $[\text{M}]^+$ : 148.1514. Found  $m/z$  148.1510.

## 3.2 Synthesis of ammonium salt

### General procedure D

To a solution of DABCO (224 mg, 2.0 mmol) in 10 ml EA was added halogenated alkanes (2.0 mmol). The mixture was stirred at rt for 3 hours, filtrated then dried under reduced pressure getting the analytically pure quaternary ammonium salt.

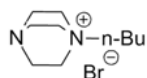

### 1-butyl-1,4-diazabicyclo[2.2.2]octan-1-ium bromide (A1)

Analytical data for:  $^1\text{H}$  NMR (400 MHz,  $\text{D}_2\text{O}$ )  $\delta$  3.39 (t,  $J = 8.0$  Hz, 6H), 3.27-3.23 (m, 2H), 3.18 (t,  $J = 8.0$  Hz, 6H), 1.77-1.69 (m, 2H), 1.41-1.32 (m, 2H), 0.94 (t,  $J = 7.5$  Hz, 3H);  $^{13}\text{C}$  NMR (101 MHz,  $\text{D}_2\text{O}$ )  $\delta$  64.39, 64.36, 64.32, 51.98, 51.94, 51.91, 44.1, 23.1, 19.2, 12.7; HRMS (ESI+) exact mass calcd for  $\text{C}_{10}\text{H}_{21}\text{N}_2$  requires  $m/z$   $[\text{M}-\text{Br}]^+$ : 169.1699. Found  $m/z$  169.1697

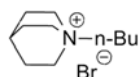

### 1-butylquinuclidin-1-ium bromide (A2)

Analytical data for **A2**:  $^1\text{H}$  NMR (400 MHz,  $\text{D}_2\text{O}$ )  $\delta$  3.37 (t,  $J = 8.0$  Hz, 6H), 3.11-3.07 (m, 2H), 2.18-2.15 (m, 1H), 2.10-1.92 (m, 6H), 1.72-1.66 (m, 2H), 1.36-1.31 (m, 2H), 0.92 (t,  $J = 8.0$  Hz, 3H);  $^{13}\text{C}$  NMR (101 MHz,  $\text{D}_2\text{O}$ )  $\delta$  64.08, 64.04, 64.01, 54.4, 23.37, 23.27, 19.2, 19.03, 18.98, 18.98, 12.7; HRMS (ESI+) exact mass calcd for  $\text{C}_{11}\text{H}_{22}\text{N}$  requires  $m/z$   $[\text{M}-\text{Br}]^+$ : 168.1747. Found  $m/z$  168.1748.

Note: proton and carbon peak of NCH<sub>2</sub>CO of **A3-A12** are not found in the NMR spectra due to the rapid exchange with D<sub>2</sub>O. Those two peaks could be detected by using CDCl<sub>3</sub> as solvent as exemplified by the spectra of **A8** in CDCl<sub>3</sub>.

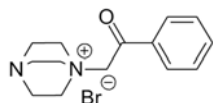

**1-(2-oxo-2-phenylethyl)-1,4-diazabicyclo[2.2.2]octan-1-ium bromide (A3)**

Analytical data for **A3**: <sup>1</sup>H NMR (500 MHz, D<sub>2</sub>O) δ 7.99 (dd, *J* = 10.0, 1.0 Hz, 2H), 7.78 (dt, *J* = 10.0, 1.0 Hz, 1H), 7.62 (t, *J* = 10.0 Hz, 2H), 3.81 (t, *J* = 7.5 Hz, 6H), 3.32 (t, *J* = 7.5 Hz, 6H); <sup>13</sup>C NMR (126 MHz, D<sub>2</sub>O) δ 191.7, 135.2, 134.1, 129.1, 127.9, 52.9, 44.1. HRMS (ESI+) exact mass calcd for C<sub>14</sub>H<sub>19</sub>N<sub>2</sub>O requires *m/z* [M-Br]<sup>+</sup>: 231.1492. Found *m/z* 231.1490

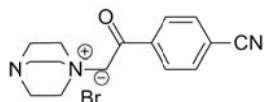

**1-(2-(4-cyanophenyl)-2-oxoethyl)-1,4-diazabicyclo[2.2.2]octan-1-ium bromide (A4)**

Analytical data for **A4**: <sup>1</sup>H NMR (500 MHz, D<sub>2</sub>O) δ 8.12 (dd, *J* = 7.5, 3.0 Hz, 2H), 7.98 (dd, *J* = 7.5, 3.0 Hz, 2H), 3.82 (t, *J* = 7.5 Hz, 6H), 3.33 (t, *J* = 7.5 Hz, 6H); <sup>13</sup>C NMR (126 MHz, D<sub>2</sub>O) δ 190.5, 137.3, 133.1, 128.2, 118.3, 116.7, 52.9, 44.0; HRMS (ESI+) exact mass calcd for C<sub>15</sub>H<sub>18</sub>N<sub>3</sub>O requires *m/z* [M-Br]<sup>+</sup>: 256.1444. Found *m/z* 256.1447.

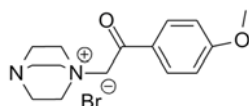

**1-(2-(4-methoxyphenyl)-2-oxoethyl)-1,4-diazabicyclo[2.2.2]octan-1-ium bromide (A5)**

Analytical data for **A5**: <sup>1</sup>H NMR (500 MHz, D<sub>2</sub>O) δ 7.99 (d, *J* = 10.0 Hz, 2H), 7.13 (d, *J* = 10.0 Hz, 2H), 3.94 (s, 3H), 3.80 (t, *J* = 7.5 Hz, 6H), 3.31 (t, *J* = 7.5 Hz, 6H); <sup>13</sup>C NMR (101 MHz, D<sub>2</sub>O) δ 189.8, 164.5, 130.5, 127.1, 114.3, 55.6, 52.8, 44.0; HRMS (ESI+) exact mass calcd for C<sub>15</sub>H<sub>20</sub>N<sub>2</sub>O<sub>2</sub> requires *m/z* [M-Br]<sup>+</sup>: 260.1525. Found *m/z* 260.1523.

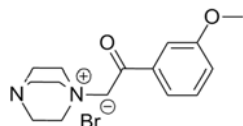

**1-(2-(3-methoxyphenyl)-2-oxoethyl)-1,4-diazabicyclo[2.2.2]octan-1-ium bromide (A6)**

Analytical data for **A6**: <sup>1</sup>H NMR (400 MHz, D<sub>2</sub>O) δ 7.55 (d, *J* = 8.0, 1H), 7.50 (t, *J* = 8.0, 1H), 7.46 (s, 1H), 7.31 (dd, *J* = 8.0, 2.0 Hz, 1H), 3.86 (s, 3H), 3.77 (t, *J* = 8.0 Hz, 6H), 3.28 (t, *J* = 8.0 Hz, 6H); <sup>13</sup>C NMR (101 MHz, D<sub>2</sub>O) δ 191.2, 159.2, 135.4, 130.3, 121.1, 120.8, 112.4, 55.5, 52.8, 44.0; HRMS (ESI+) exact mass calcd for C<sub>15</sub>H<sub>20</sub>N<sub>2</sub>O<sub>2</sub> requires *m/z* [M-Br]<sup>+</sup>: 260.1525. Found *m/z* 260.1524.

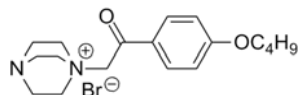

**1-(2-(4-butoxyphenyl)-2-oxoethyl)-1,4-diazabicyclo[2.2.2]octan-1-ium bromide (A7)**

Analytical data for **A7**: <sup>1</sup>H NMR (500 MHz, D<sub>2</sub>O) δ 7.97 (d, *J* = 10.0 Hz, 2H), 7.11 (d, *J* = 10.0 Hz, 2H), 4.18 (t, *J* = 10.0 Hz, 2H), 3.79 (t, *J* = 7.5 Hz, 6H), 3.31 (t, *J* = 7.5 Hz, 6H), 1.82-1.76 (m, 2H), 1.50-1.45 (m, 2H), 0.96 (t, *J* = 7.5 Hz, 3H); <sup>13</sup>C NMR (126 MHz, D<sub>2</sub>O) δ 189.9, 164.1, 130.6, 127.1, 114.9, 68.7, 52.9, 44.1, 30.3, 18.5, 13.0; HRMS (ESI+) exact mass calcd for C<sub>18</sub>H<sub>27</sub>N<sub>2</sub>O<sub>2</sub> requires *m/z*



[M-Br]<sup>+</sup>: 303.2067. Found m/z 303.2068.

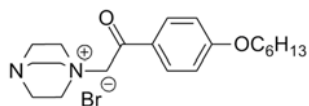

**1-(2-(4-(hexyloxy)phenyl)-2-oxoethyl)-1,4-diazabicyclo[2.2.2]octan-1-ium bromide (A8)**

Analytical data for **A8**: <sup>1</sup>H NMR (500 MHz, D<sub>2</sub>O) δ 7.88 (d, *J* = 10.0 Hz, 2H), 6.84 (d, *J* = 10.0 Hz, 2H), 3.88 (m, 2H), 3.75 (m, 6H), 3.23 (m, 6H), 1.63 (m, 2H), 1.36-1.30 (m, 6H), 0.92 (t, *J* = 5.0 Hz, 3H); <sup>13</sup>C NMR (101 MHz, D<sub>2</sub>O) δ 189.4, 163.8, 130.7, 127.0, 114.5, 68.4, 52.7, 44.0, 31.5, 28.7, 25.4, 22.4, 13.7; For comparison, NMR spectra were also measured by using CDCl<sub>3</sub> as solvent to find signals of *NCH<sub>2</sub>CO*. H NMR (500 MHz, CDCl<sub>3</sub>) δ 8.00 (d, *J* = 8.5 Hz, 3H), 6.84 (d, *J* = 8.5 Hz, 2H), 5.53 (s, 2H, *NCH<sub>2</sub>CO*), 4.03 (s, 6H), 3.91 (t, *J* = 6.0 Hz, 2H), 3.22 (s, 6H), 1.80-1.67 (m, 2H), 1.46-1.36 (m, 2H), 1.37-1.26 (m, 4H), 0.93-0.85 (m, 3H); <sup>13</sup>C NMR (101 MHz, CDCl<sub>3</sub>) δ 189.3, 164.5, 131.0, 127.0, 114.7, 68.5, 65.3 (*NCH<sub>2</sub>CO*), 52.8, 45.2, 31.5, 29.0, 25.6, 22.5, 14.00; HRMS (ESI<sup>+</sup>) exact mass calcd for C<sub>20</sub>H<sub>30</sub>N<sub>2</sub>O<sub>2</sub> requires m/z [M-Br]<sup>+</sup>: 330.2307. Found m/z 330.2307.

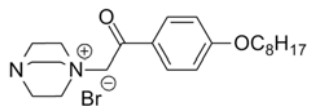

**1-(2-(4-(octyloxy)phenyl)-2-oxoethyl)-1,4-diazabicyclo[2.2.2]octan-1-ium bromide (A9)**

Analytical data for **A9**: <sup>1</sup>H NMR (500 MHz, D<sub>2</sub>O) δ 7.87 (d, *J* = 7.5 Hz, 2H), 6.81 (d, *J* = 7.5 Hz, 2H), 3.84 (m, 2H), 3.74 (m, 6H), 3.20 (m, 6H), 1.61 (m, 2H), 1.41-1.23 (m, 10H), 0.95 (t, *J* = 7.5 Hz, 3H); <sup>13</sup>C NMR (101 MHz, D<sub>2</sub>O) δ 189.3, 163.8, 130.8, 127.0, 114.4, 68.3, 52.7, 44.0, 31.9, 29.5, 29.3, 29.0, 25.9, 22.6, 13.9; HRMS (ESI<sup>+</sup>) exact mass calcd for C<sub>22</sub>H<sub>35</sub>N<sub>2</sub>O<sub>2</sub> requires m/z [M-Br]<sup>+</sup>: 359.2693. Found m/z 359.2695.

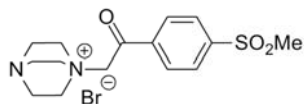

**1-(2-(4-(methylsulfonyl)phenyl)-2-oxoethyl)-1,4-diazabicyclo[2.2.2]octan-1-ium bromide (A10)**

Analytical data for **A10**: <sup>1</sup>H NMR (500 MHz, D<sub>2</sub>O) δ 8.21 (d, *J* = 10.0 Hz, 2H), 8.13 (d, *J* = 10.0 Hz, 2H), 3.83 (t, *J* = 7.5 Hz, 6H), 3.33 (t, *J* = 7.5 Hz, 6H) and 3.33 (s, 3H); <sup>13</sup>C NMR (126 MHz, D<sub>2</sub>O) δ 190.4, 143.7, 138.3, 128.9, 127.8, 52.9, 44.0, 42.9; HRMS (ESI<sup>+</sup>) exact mass calcd for C<sub>15</sub>H<sub>20</sub>N<sub>2</sub>O<sub>3</sub>S requires m/z [M-Br]<sup>+</sup>: 308.1195. Found m/z 308.1196.

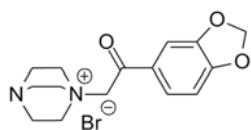

**1-(2-(benzo[d][1,3]dioxol-5-yl)-2-oxoethyl)-1,4-diazabicyclo[2.2.2]octan-1-ium bromide (A11)**

Analytical data for **A11**: <sup>1</sup>H NMR (500 MHz, D<sub>2</sub>O) δ 7.63 (d, *J* = 10.0 Hz, 1H), 7.44 (s, 1H), 7.02 (d, *J* = 10.0 Hz, 1H), 6.13 (s, 2H), 3.78 (t, *J* = 7.5 Hz, 6H), 3.30 (t, *J* = 7.5 Hz, 6H); <sup>13</sup>C NMR (101 MHz, D<sub>2</sub>O) δ 189.3, 153.2, 148.1, 128.6, 125.3, 108.3, 107.1, 102.4, 52.8, 44.0; HRMS (ESI<sup>+</sup>) exact mass calcd for C<sub>15</sub>H<sub>18</sub>N<sub>2</sub>O<sub>3</sub> requires m/z [M-Br]<sup>+</sup>: 274.1317. Found m/z 274.1319.

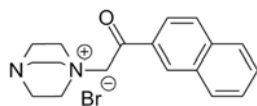

**1-(2-(naphthalen-2-yl)-2-oxoethyl)-1,4-diazabicyclo[2.2.2]octan-1-ium bromide (A12)**

Analytical data for **A12**:  $^1\text{H}$  NMR (500 MHz,  $\text{D}_2\text{O}$ )  $\delta$  8.48 (s, 1H), 8.05 (d,  $J = 5.0$  Hz, 1H), 7.98 (dd,  $J = 10.0, 5.0$  Hz, 2H), 7.88 (dd,  $J = 10.0, 1.5$  Hz, 1H), 7.74 (dd,  $J = 7.5, 1.5$  Hz, 1H), 7.67 (t,  $J = 7.5$  Hz, 1H), 3.80 (t,  $J = 7.5$  Hz, 6H), 3.31 (t,  $J = 7.5$  Hz, 6H);  $^{13}\text{C}$  NMR (126 MHz,  $\text{D}_2\text{O}$ )  $\delta$  191.2, 135.9, 131.8, 130.5, 129.82, 129.77, 128.9, 127.8, 127.4, 122.5, 52.9, 44.1; HRMS (ESI+) exact mass calcd for  $\text{C}_{18}\text{H}_{20}\text{N}_2\text{O}$  requires  $m/z$   $[\text{M}-\text{Br}]^+$ : 280.1576. Found  $m/z$  280.1577.

### 3.3 preparation of catalyst

#### 3.3.1 Synthesis of silver phosphate<sup>[2]</sup>

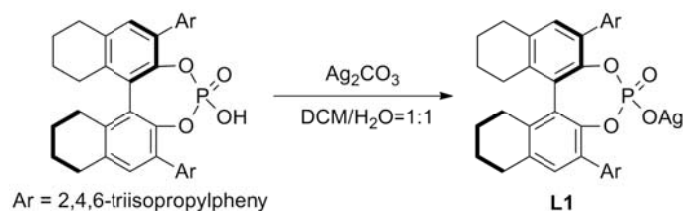

To a solution of chiral phosphoric (140 mg, 0.25 mmol) in  $\text{CH}_2\text{Cl}_2$  (1.5 mL) in the dark was added  $\text{Ag}_2\text{CO}_3$  (34.5 mg, 0.125 mmol) followed by distilled water 1.5 mL. The resulting mixture was stirred for one hour. After this time, the mixture was diluted with water (3 mL) and  $\text{CH}_2\text{Cl}_2$  (3 mL). The aqueous layer extracted with  $\text{CH}_2\text{Cl}_2$ . The combined organic extracts were filtered through celite and concentrated to afford the product as a fluffy white solid (163 mg, 0.24 mmol, 95% yield).

#### 3.3.2 Preparation of ion-pair catalyst

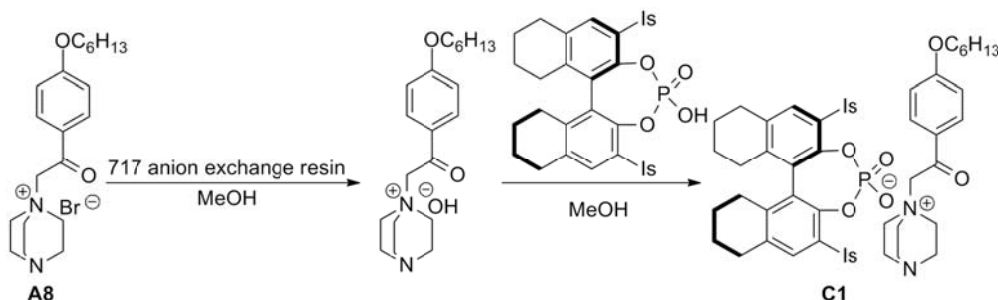

A solution of quaternary ammonium salt **A8** (1.0 mmol) and 707 anion exchange resin (4.0 g, 12.0 mmol, 3mmol/g) in 15 mL methanol was stirred at rt for 3 hours, then filtered. The filtrate was added 8H-TRIP phosphoric acid (1.0 mmol, 760 mg) and stirred for two hours at rt. Then concentrated to get the ionic pair catalyst **C1** quantitatively.

Analytical data for **C1**:  $^1\text{H}$  NMR (500 MHz,  $\text{CDCl}_3$ )  $\delta$  7.90 (d,  $J = 8.5$  Hz, 2H), 6.97 (s, 2H), 6.93 (s, 2H), 6.84 (s, 2H), 6.64 (d,  $J = 8.5$  Hz, 2H), 6.05 (d,  $J = 15.0$  Hz, 1H), 4.42 (d,  $J = 15.0$  Hz, 1H), 3.97 (d,  $J = 2.4$  Hz, 2H), 3.51 (m, 3H), 3.40 (m, 3H), 2.95-2.58 (m, 20H), 2.28 (d,  $J = 16.6$  Hz, 2H), 1.85-1.70 (m, 10H), 1.47-1.45 (m, 2H), 1.35-1.34 (m, 4H), 1.26-1.24 (m, 12H), 0.98 (m, 11H), 0.91 (m, 8H), 0.86 (d,  $J = 6.8$  Hz, 6H);  $^{13}\text{C}$  NMR (126 MHz,  $\text{cdcl}_3$ )  $\delta$  189.8, 164.5, 148.3, 147.1, 146.0, 135.9, 134.0, 132.2, 132.1, 131.2, 129.0, 128.1, 127.0, 120.9, 119.5, 114.4, 77.3, 68.3, 65.2, 52.0, 44.5, 33.9, 31.5, 30.7, 30.3, 29.2, 29.1, 27.8, 26.2, 25.7, 24.7, 24.3, 24.0, 23.5, 23.3, 23.1, 23.0, 22.6, 14.0;  $^{31}\text{P}$  NMR (162 MHz,  $\text{CDCl}_3$ )  $\delta$  2.40; HRMS (ESI+) exact mass calcd for  $\text{C}_{20}\text{H}_{31}\text{N}_2\text{O}_2$  requires  $m/z$   $[\text{M}-\text{phosphate}]^+$ : 331.2380. Found  $m/z$  331.2395. HRMS (ESI-) exact mass calcd for  $\text{C}_{50}\text{H}_{64}\text{O}_4\text{P}_1$  requires  $m/z$   $[\text{M}-\text{ammonium}]^-$ : 759.4548. Found  $m/z$  759.4570.

#### 4. General procedure for asymmetric 3-*exo* iodo-cycloetherification

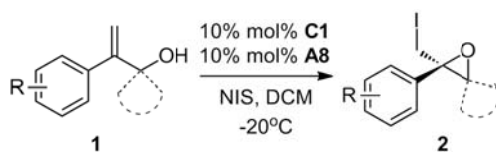

##### General procedure E

In a Schlenk tube, ion pair catalyst **C1** (0.01 mmol), ammonium salt **A8** (0.01 mmol), NIS (0.12 mmol) and CH<sub>2</sub>Cl<sub>2</sub> (1 mL) was added, then the reaction mixture was cooled to -20 °C. Allyl alcohol **1** (0.1 mmol) in 0.5 mL CH<sub>2</sub>Cl<sub>2</sub> was added dropwise and the reaction was quenched by the addition of Na<sub>2</sub>S<sub>2</sub>O<sub>3</sub> aqueous solution at indicated time (monitored by TLC). The organic layer was separated, and the aqueous layer was extracted with ethyl acetate for three times. Then the organic layer combined washed with brine, dried over Na<sub>2</sub>SO<sub>4</sub>, filtered and then concentrated. The residue was purified by preparative TLC (ethyl acetate/petroleum ether = 1:30, v/v) to afford the product.

*Note: Racemic products were obtained by following general procedure E using rac-C1 as catalyst.*

##### Characterization of product

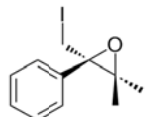

##### (R)-2-(iodomethyl)-3,3-dimethyl-2-phenyloxirane (**2a**)

Prepared according to the general procedure E with **1a** (16.2 mg, 0.1 mmol) over the course of 107 h at -20 °C as a yellow liquid (28.2 mg, 99% yield, 94% *ee*). The enantiomeric purity was determined by HPLC analysis (ChiralPak ID3 column, hexane/*i*-PrOH 98.5:1.5, 0.5 mL/min,  $t_{\text{major}} = 5.98$  min,  $t_{\text{minor}} = 5.60$  min). <sup>1</sup>H NMR (500 MHz, CDCl<sub>3</sub>) δ 7.39-7.30 (m, 5H), 3.61-3.51 (m, 2H), 1.54 (s, 3H), 1.02 (s, 3H); <sup>13</sup>C NMR (126 MHz, CDCl<sub>3</sub>) δ 138.6, 128.0, 127.7, 127.3, 68.2, 67.8, 22.8, 20.8, 11.6; IR (neat) 2961, 1447, 763, 700 cm<sup>-1</sup>; HRMS (EI+) exact mass calcd for C<sub>11</sub>H<sub>13</sub>O: *m/z* 161.0966 ([M-I]<sup>+</sup>), found: *m/z* 161.0964.  $[\alpha]_{\text{D}}^{23.5} = -23.5$  (*c* 0.55, CHCl<sub>3</sub>).

**Gram scale synthesis of 2a:** At nitrogen atmosphere, CH<sub>2</sub>Cl<sub>2</sub> (40 ml) was added to a mixture of ion pair catalyst **C1** (335 mg, 0.31 mmol), ammonium salt **A8** (126 mg, 0.31 mmol) and NIS (1.7g, 7.56 mmol) under -20 °C. After the mixture stirred for one minute, **1a** (1.0 g, 6.17 mmol) in CH<sub>2</sub>Cl<sub>2</sub> (3.0ml) was added dropwise. After 127 h, the reaction was quenched by the addition of Na<sub>2</sub>S<sub>2</sub>O<sub>3</sub> aqueous solution. The organic layer was separated, and the aqueous layer was extracted with ethyl acetate for three times. Then the organic layer combined washed with brine, dried over Na<sub>2</sub>SO<sub>4</sub>, filtered and then concentrated. The residue was purified by column chromatography (ethyl acetate/petroleum ether = 1/100, v/v) to afford 1.47 g (83 %) yellow liquid. Enantiomeric excess was found to be 93% measured by chiral HPLC (ChiralPak AD-H column, hexane/*i*-PrOH 98.5:1.5 0.7 mL/min,  $t_{\text{major}} = 5.77$  min,  $t_{\text{minor}} = 5.41$  min).

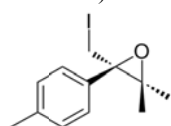

##### (R)-2-(iodomethyl)-3,3-dimethyl-2-(p-tolyl)oxirane (**2aa**)

Prepared according to the general procedure E with **1aa** (17.6 mg, 0.1 mmol) over the course of 111 h at -20 °C as a yellow liquid (27.6 mg, 95% yield, 93% *ee*). The enantiomeric purity was determined by HPLC analysis (ChiralPak ID3 column, hexane/*i*-PrOH 98.5:1.5, 0.7 mL/min,  $t_{\text{major}} = 3.63$  min,  $t_{\text{minor}} =$

3.44 min). <sup>1</sup>H NMR (500 MHz, CDCl<sub>3</sub>) δ 7.27 (d, *J* = 10.0 Hz, 2H), 7.16 (d, *J* = 10.0 Hz, 2H), 3.59-3.55 (m, 2H), 2.35 (s, 3H), 1.52 (s, 3H), 1.02 (s, 3H); <sup>13</sup>C NMR (126 MHz, CDCl<sub>3</sub>) δ 137.4, 135.5, 128.7, 127.1, 68.1, 67.8, 22.8, 21.2, 20.8, 12.0; IR (neat) 2922, 1515, 1142, 813, 554 cm<sup>-1</sup>; HRMS (EI+) exact mass calcd for C<sub>12</sub>H<sub>15</sub>O: *m/z* 175.1123 ([M-I]<sup>+</sup>), found: *m/z* 175.1120. [α]<sub>D</sub><sup>23.5</sup> = -21.5 (*c* 0.44, CHCl<sub>3</sub>).

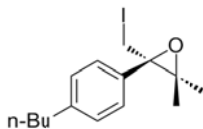

**(R)-2-(4-butylphenyl)-2-(iodomethyl)-3,3-dimethyloxirane (2ab)**

Prepared according to the general procedure E with **1ab** (21.8 mg, 0.1 mmol) over the course of 111 h at -20 °C as a yellow liquid (28.2 mg, 91% yield, 93% *ee*). The enantiomeric purity was determined by HPLC analysis (ChiralPak ADH column, hexane/*i*PrOH 98.5:1.5, 0.4 mL/min, *t*<sub>major</sub> = 10.98 min, *t*<sub>minor</sub> = 10.31 min). <sup>1</sup>H NMR (500 MHz, CDCl<sub>3</sub>) δ 7.28 (d, *J* = 10.0 Hz, 2H), 7.15 (d, *J* = 10.0 Hz, 2H), 3.59-3.55 (m, 2H), 2.61 (t, *J* = 7.5 Hz, 2H), 1.63-1.57 (m, 2H), 1.52 (s, 3H), 1.39-1.32 (m, 2H), 1.02 (s, 3H), 0.93 (t, *J* = 7.5 Hz, 3H); <sup>13</sup>C NMR (126 MHz, CDCl<sub>3</sub>) δ 142.4, 135.7, 128.0, 127.1, 68.1, 67.8, 35.4, 33.5, 22.8, 22.4, 20.8, 14.0, 11.9; IR (neat) 2956, 1456, 1010, 831, 573 cm<sup>-1</sup>; HRMS (EI+) exact mass calcd for C<sub>15</sub>H<sub>21</sub>O: *m/z* 217.1592 ([M-I]<sup>+</sup>), found: *m/z* 217.1594. [α]<sub>D</sub><sup>23.5</sup> = -19.1 (*c* 1.06, CHCl<sub>3</sub>).

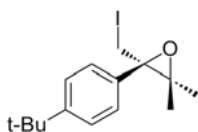

**(R)-2-(4-(tert-butyl)phenyl)-2-(iodomethyl)-3,3-dimethyloxirane (2ac)**

Prepared according to the general procedure E with **1ac** (21.8 mg, 0.1 mmol) over the course of 111 h at -20 °C as a white solid (28.2 mg, 86% yield, 91% *ee*). The enantiomeric purity was determined by HPLC analysis (Lux 5μ cellulose-3 column, hexane/*i*-PrOH 98:2, 0.5 mL/min, *t*<sub>major</sub> = 7.68 min, *t*<sub>minor</sub> = 8.25 min). <sup>1</sup>H NMR (500 MHz, CDCl<sub>3</sub>) δ 7.35 (d, *J* = 8.5 Hz, 2H), 7.31 (d, *J* = 8.5 Hz, 2H), 3.58 (d, *J* = 10.0 Hz, 1H), 3.55 (d, *J* = 10.0 Hz, 1H), 1.53 (s, 3H), 1.32 (s, 9H), 1.02 (s, 3H); <sup>13</sup>C NMR (126 MHz, CDCl<sub>3</sub>) δ 150.5, 135.3, 126.9, 124.9, 68.1, 67.7, 34.6, 31.4, 22.8, 20.8, 11.8; IR (neat) 2962, 1270, 1008, 830, 619 cm<sup>-1</sup>; HRMS (EI+) exact mass calcd for C<sub>11</sub>H<sub>13</sub>O: *m/z* 217.1592 ([M-I]<sup>+</sup>), found: *m/z* 217.1590. [α]<sub>D</sub><sup>23.5</sup> = -13.6 (*c* 0.93, CHCl<sub>3</sub>).

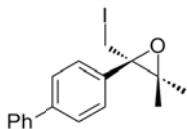

**(R)-2-([1,1'-biphenyl]-4-yl)-2-(iodomethyl)-3,3-dimethyloxirane (2ad)**

Prepared according to the general procedure E with **1ad** (23.8 mg, 0.1 mmol) over the course of 62 h at -20 °C as a yellow liquid (33.5 mg, 92% yield, 94% *ee*). The enantiomeric purity was determined by HPLC analysis (ChiralPak ID3 column, hexane/*i*-PrOH 98:2, 0.7 mL/min, *t*<sub>major</sub> = 4.79 min, *t*<sub>minor</sub> = 4.15 min). <sup>1</sup>H NMR (500 MHz, CDCl<sub>3</sub>) δ 7.61 (d, *J* = 10.0 Hz, 2H), 7.59 (d, *J* = 10.0 Hz, 2H), 7.43-7.47 (m, 4H), 7.35 (t, *J* = 7.5 Hz, 1H), 3.63 (d, *J* = 10.0 Hz, 1H), 3.61 (d, *J* = 10.0 Hz, 1H), 1.56 (s, 3H), 1.07 (s, 3H); <sup>13</sup>C NMR (126 MHz, CDCl<sub>3</sub>) δ 140.6, 140.5, 137.6, 128.8, 127.7, 127.4, 127.1, 126.7, 68.3, 67.7, 22.9, 20.8, 11.5; IR (neat) 2922, 1487, 829, 755, 580 cm<sup>-1</sup>; HRMS (EI+) exact mass calcd for C<sub>17</sub>H<sub>17</sub>O: *m/z* 257.1302 ([M-I]<sup>+</sup>), found: *m/z* 257.1300. [α]<sub>D</sub><sup>23.5</sup> = -18.5 (*c* 0.93, CHCl<sub>3</sub>).

m/z 364.0324 ( $[M]^+$ ), found: m/z 364.0326.  $[\alpha]_D^{23.5} = -9.3$  (c 1.34,  $\text{CHCl}_3$ ).

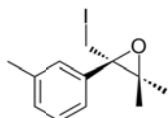

**(R)-2-(iodomethyl)-3,3-dimethyl-2-(m-tolyl)oxirane (2ae)**

Prepared according to the general procedure E with **1ae** (17.2 mg, 0.1 mmol) over the course of 134 h at  $-20^\circ\text{C}$  as a yellow liquid (27.3 mg, 93% yield, 90% *ee*). The enantiomeric purity was determined by HPLC analysis (Lux 5 $\mu$  cellulose-4 column, hexane/*i*-PrOH 98:2, 0.7 mL/min,  $t_{\text{major}} = 5.89$  min,  $t_{\text{minor}} = 5.51$  min).  $^1\text{H}$  NMR (500 MHz,  $\text{CDCl}_3$ )  $\delta$  7.23 (t,  $J = 5.0$  Hz, 1H), 7.18 (s, 1H), 7.17 (d,  $J = 5.0$  Hz, 1H), 7.11 (d,  $J = 5.0$  Hz, 1H), 3.59 (d,  $J = 10.0$  Hz, 1H), 3.56 (d,  $J = 10.0$  Hz, 1H), 2.37 (s, 3H), 1.53 (s, 3H), 1.03 (s, 3H);  $^{13}\text{C}$  NMR (126 MHz,  $\text{CDCl}_3$ )  $\delta$  138.4, 137.7, 128.5, 127.9, 127.8, 124.4, 68.2, 67.8, 22.8, 21.5, 20.8, 11.7; IR (neat) 2924, 1456, 1376, 785  $\text{cm}^{-1}$ ; HRMS (EI+) exact mass calcd for  $\text{C}_{12}\text{H}_{15}\text{O}$ : m/z 175.1123 ( $[M-I]^+$ ), found: m/z 175.1119.  $[\alpha]_D^{23.5} = -25.7$  (c 0.84,  $\text{CHCl}_3$ ).

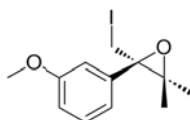

**(R)-2-(iodomethyl)-2-(3-methoxyphenyl)-3,3-dimethyloxirane (2af)**

Prepared according to the general procedure E with **1af** (16.2mg, 0.1 mmol) over the course of 120 h at  $-20^\circ\text{C}$  as a yellow liquid (18.7 mg, 57% yield, 91% *ee*). The enantiomeric purity was determined by HPLC analysis (ChiralPak OD-H column, hexane/*i*-PrOH 98:2, 0.4 mL/min,  $t_{\text{major}} = 7.75$  min,  $t_{\text{minor}} = 9.12$  min).  $^1\text{H}$  NMR (500 MHz,  $\text{CDCl}_3$ )  $\delta$  7.26 (t,  $J = 10.0$  Hz, 1H), 6.96 (d,  $J = 10.0$  Hz, 1H), 6.93 (s, 1H), 6.84 (d,  $J = 5.0$  Hz, 1H), 3.82 (s, 3H), 3.60-3.55 (m, 2H), 1.5 (s, 3H), 1.04 (s, 3H);  $^{13}\text{C}$  NMR (126 MHz, )  $\delta$  159.3, 140.2, 129.1, 119.5, 113.2, 113.0, 68.3, 67.8, 55.3, 22.7, 20.8, 11.3; IR (neat) 2917, 1109, 813, 555  $\text{cm}^{-1}$ ; HRMS (EI+) exact mass calcd for  $\text{C}_{12}\text{H}_{15}\text{O}_2$ : m/z 191.1072 ( $[M-I]^+$ ), found: m/z 191.1074.  $[\alpha]_D^{23.5} = -30.8$  (c 1.21,  $\text{CHCl}_3$ ).

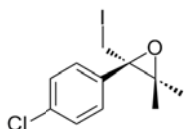

**(R)-2-(4-chlorophenyl)-2-(iodomethyl)-3,3-dimethyloxirane (2ag)**

Prepared according to the general procedure E with **1ag** (20.2 mg, 0.1 mmol) over the course of 120 h at  $-20^\circ\text{C}$  as a yellow liquid (18.1 mg, 55% yield, 93% *ee*). The enantiomeric purity was determined by HPLC analysis (ChiralPak AD-H column, hexane/*i*-PrOH 98.5:1.5, 0.4 mL/min,  $t_{\text{major}} = 12.17$  min,  $t_{\text{minor}} = 11.49$  min).  $^1\text{H}$  NMR (500 MHz,  $\text{CDCl}_3$ )  $\delta$  7.33 (s, 4H), 3.54 (s, 2H), 1.53 (s, 3H), 1.01 (s, 3H);  $^{13}\text{C}$  NMR (126 MHz,  $\text{CDCl}_3$ ) 137.1, 133.6, 128.7, 128.3, 68.3, 67.4, 22.8, 20.7, 10.9; IR (neat) 2957, 1376, 1142, 814, 603  $\text{cm}^{-1}$ ; HRMS (EI+) exact mass calcd for  $\text{C}_{11}\text{H}_{12}\text{OCl}$ : m/z 195.0577 ( $[M-I]^+$ ), found: m/z 195.0581.  $[\alpha]_D^{23.5} = -19.2$  (c 0.58,  $\text{CHCl}_3$ ).

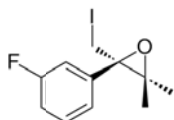

**(R)-2-(3-fluorophenyl)-2-(iodomethyl)-3,3-dimethyloxirane (2ah)**

Prepared according to the general procedure E with **1ah** (18.3 mg, 0.1 mmol) over the course of 107 h at  $-20^\circ\text{C}$  as a yellow liquid (10.1 mg, 32% yield, 86% *ee*). The enantiomeric purity was determined by

HPLC analysis (ChiralPak ID3 column, hexane/*i*-PrOH 98:2, 0.7 mL/min,  $t_{\text{major}} = 6.73$  min,  $t_{\text{minor}} = 6.33$  min).  $^1\text{H}$  NMR (500 MHz,  $\text{CDCl}_3$ )  $\delta$  7.32 (dt,  $J = 10.0, 5.0$  Hz, 1H), 7.17 (d,  $J = 10.0$  Hz, 1H), 7.11 (d,  $J = 10.0$  Hz, 1H), 7.01 (td,  $J = 10.0, 5.0$  Hz, 1H), 3.57 (d,  $J = 10.0$  Hz, 2H), 3.54 (d,  $J = 10.0$  Hz, 2H), 1.53 (s, 3H), 1.03 (s, 3H);  $^{13}\text{C}$  NMR (126 MHz,  $\text{CDCl}_3$ )  $\delta$  162.4 (d,  $J = 272.4$  Hz), 141.2 (d,  $J = 5.0$  Hz), 129.7 (d,  $J = 7.6$  Hz), 122.8, 114.8 (d,  $J = 21.4$  Hz), 114.5 (d,  $J = 22.7$  Hz), 68.5, 67.4, 22.7, 20.7, 10.6;  $^{19}\text{F}$  NMR (376 MHz,  $\text{CDCl}_3$ )  $\delta$  -112.8; IR (neat) 2957, 1437, 763, 573  $\text{cm}^{-1}$ ; HRMS (EI+) exact mass calcd for  $\text{C}_{11}\text{H}_{13}\text{O}$ :  $m/z$  161.0966 ( $[\text{M-I}]^+$ ), found:  $m/z$  161.0964.  $[\alpha]_{\text{D}}^{23.5} = -23.9$  ( $c$  0.43,  $\text{CHCl}_3$ ).

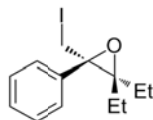

**(R)-2,2-diethyl-3-(iodomethyl)-3-phenyloxirane (2b)**

Prepared according to the general procedure E with **1b** (19.3 mg, 0.1 mmol) over the course of 115 h at  $-20$  °C as a yellow liquid (19.0 mg, containing about 9% rearrangement product, 60% yield, 95% *ee*). The enantiomeric purity was determined by HPLC analysis (ChiralPak IC column, hexane/*i*-PrOH 98:2, 0.7 mL/min,  $t_{\text{major}} = 6.34$  min,  $t_{\text{minor}} = 5.72$  min).  $^1\text{H}$  NMR (500 MHz,  $\text{CDCl}_3$ )  $\delta$  7.36-7.30 (m, 5H), 3.64-3.59 (m, 2H), 1.95-1.87 (m, 1H), 1.74-1.71 (m, 1H), 1.25-1.20 (m, 2H), 1.11 (t,  $J = 7.5$  Hz, 3H), 0.82 (t,  $J = 7.5$  Hz, 3H);  $^{13}\text{C}$  NMR (126 MHz,  $\text{CDCl}_3$ )  $\delta$  138.8, 128.9, 127.9, 127.6, 75.8, 69.0, 24.8, 23.4, 12.2, 10.0, 8.8; IR (neat) 2956, 1447, 701, 577  $\text{cm}^{-1}$ ; HRMS (EI+) exact mass calcd for  $\text{C}_{13}\text{H}_{17}\text{O}$ :  $m/z$  189.1279 ( $[\text{M-I}]^+$ ), found:  $m/z$  189.1278.  $[\alpha]_{\text{D}}^{23.5} = -65.7$  ( $c$  0.47,  $\text{CHCl}_3$ ).

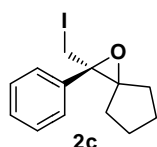

gram scale (5 mol% **C1**)  
47 h, 92%, 98% *ee*  
3 mmol (1 mol% **C1**)  
72 h, 87%, 97.6% *ee*

**(R)-2-(iodomethyl)-2-phenyl-1-oxaspiro[2.4]heptanes (2c)**

Prepared according to the general procedure E with **1c** (19.2 mg, 0.1 mmol) over the course of 44 h at  $-20$  °C as a yellow liquid (32.1 mg, 99% yield, 97% *ee*). The enantiomeric purity was determined by HPLC analysis (ChiralPak OD-H column, hexane/*i*-PrOH 98:2, 0.7 mL/min,  $t_{\text{major}} = 7.18$  min,  $t_{\text{minor}} = 7.81$  min).  $^1\text{H}$  NMR (500 MHz,  $\text{CDCl}_3$ )  $\delta$  7.36 (d,  $J = 5.0$  Hz, 4H), 7.32-7.30 (m, 1H), 3.70 (d,  $J = 10.0$  Hz, 1H), 3.45 (d,  $J = 10.0$  Hz, 1H), 2.16-2.11 (m, 1H), 1.91-1.71 (m, 4H), 1.58-1.52 (m, 1H), 1.45-1.39 (m, 1H), 1.30-1.26 (m, 1H);  $^{13}\text{C}$  NMR (126 MHz,  $\text{CDCl}_3$ )  $\delta$  128.1, 127.7, 126.7, 80.0, 66.3, 32.6, 30.7, 25.4, 25.1, 12.0; IR (neat) 2960, 1447, 762, 572  $\text{cm}^{-1}$ ; HRMS (EI+) exact mass calcd for  $\text{C}_{13}\text{H}_{15}\text{O}$ :  $m/z$  187.1123 ( $[\text{M-I}]^+$ ), found:  $m/z$  187.1125.  $[\alpha]_{\text{D}}^{23.5} = -38.5$  ( $c$  1.03,  $\text{CHCl}_3$ ).

**Gram scale synthesis of 2c:** At nitrogen atmosphere,  $\text{CH}_2\text{Cl}_2$  (30 mL) was added to a mixture of ion pair catalyst **C1** (290 mg, 0.27 mmol), ammonium salt **A8** (109 mg, 0.27 mmol) and NIS (1.46 g, 6.38 mmol) under  $-20$  °C. After the mixture stirred for 5 min, **1c** (1.0 g) in  $\text{CH}_2\text{Cl}_2$  (3.0 mL) was added dropwise. After 47 h, the reaction was quenched by the addition of  $\text{Na}_2\text{S}_2\text{O}_3$  aqueous solution. The organic layer was separated, and the aqueous layer was extracted with ethyl acetate for three times. Then the organic layer combined, washed with brine, dried over  $\text{Na}_2\text{SO}_4$ , filtered and then concentrated. The residue was purified by column chromatography (ethyl acetate/petroleum ether = 1:100, v/v) to afford 1.54 g (92%) yellow liquid. Enantiomeric excess was found to be 98% measured by chiral HPLC (ChiralPak OD-H column, hexane/*i*-PrOH 98:2 0.7 mL/min,  $t_{\text{major}} = 6.56$  min,  $t_{\text{minor}} = 7.04$  min).

**Synthesis of 2c using 1 mol% C1 on 3 mmol scale:**

Following gram scale synthesis of **2c**, synthesis of **2c** on 3 mmol scale was carried out using 1 mol% **C1** (32 mg, 0.03 mmol) under  $-40$  °C. After 72 h, most of **1c** was consumed and work-up of the reaction afforded **2c** (820 mg,

87%). Enantiomeric excess was found to be 97.6% measured by chiral HPLC (ChiralPak OD-H column, hexane/*i*-PrOH 98:2 0.7 mL/min,  $t_{\text{major}} = 7.16$  min,  $t_{\text{minor}} = 7.79$  min).

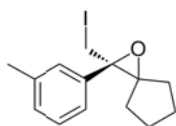

**(R)-2-(iodomethyl)-2-(m-tolyl)-1-oxaspiro[2.4]heptane (2ca)**

Prepared according to the general procedure E with **1ca** (20.8 mg, 0.1 mmol) over the course of 70 h at  $-20$  °C as a yellow liquid (28.3 mg, 84 % yield, 95% *ee*). The enantiomeric purity was determined by HPLC analysis (Lux 5 $\mu$  cellulose-4 column, hexane/*i*-PrOH 95:5, 0.7 mL/min,  $t_{\text{major}} = 6.32$  min,  $t_{\text{minor}} = 5.86$  min).  $^1\text{H}$  NMR (500 MHz,  $\text{CDCl}_3$ )  $\delta$  7.24 (t,  $J = 7.5$  Hz, 1H), 7.15(s, 1H), 7.14 (d,  $J = 7.5$  Hz, 1H), 7.12 (d,  $J = 7.5$  Hz, 1H), 3.69 (d,  $J = 10.0$  Hz, 1H), 3.44 (d,  $J = 10.0$  Hz, 1H), 2.37 (s, 3H), 2.15-2.10 (m, 1H), 1.90-1.84 (m, 1H), 1.80-1.72 (m, 3H), 1.60-1.51 (m, 1H), 1.46-1.40 (m, 1H), 1.31-1.26 (m, 1H);  $^{13}\text{C}$  NMR (126 MHz,  $\text{CDCl}_3$ )  $\delta$  138.5, 137.7, 128.5, 127.9, 127.3, 123.8, 80.0, 66.3, 32.7, 30.7, 25.4, 25.1, 21.5, 12.3; IR (neat) 2961, 1447, 763, 700  $\text{cm}^{-1}$ ; HRMS (EI+) exact mass calcd for  $\text{C}_{14}\text{H}_{17}\text{OI}$ :  $m/z$  328.0324 ( $[\text{M}]^+$ ), found:  $m/z$  328.0322.  $[\alpha]_{\text{D}}^{23.5} = -29.8$  ( $c$  1.13,  $\text{CHCl}_3$ )

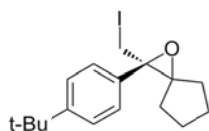

**(R)-2-(4-(tert-butyl)phenyl)-2-(iodomethyl)-1-oxaspiro[2.4]heptane (2cb)**

Prepared according to the general procedure E with **1cb** (24.5 mg, 0.1 mmol) over the course of 21 h at  $-20$  °C as a yellow liquid (31.1 mg, 82% yield, 92% *ee*). The enantiomeric purity was determined by HPLC analysis (Lux 5 $\mu$  cellulose-4 column, hexane/*i*-PrOH 98:2, 0.7 mL/min,  $t_{\text{major}} = 6.02$  min,  $t_{\text{minor}} = 5.61$  min).  $^1\text{H}$  NMR (500 MHz,  $\text{CDCl}_3$ )  $\delta$  7.35 (d,  $J = 7.5$  Hz, 2H), 7.27 (d,  $J = 7.5$  Hz, 2H), 3.66 (d,  $J = 10.0$  Hz, 1H), 3.46 (d,  $J = 10.0$  Hz, 1H), 2.16-2.10 (m, 1H), 1.88-1.83 (m, 1H), 1.79-1.71 (m, 3H), 1.57-1.51 (m, 1H), 1.47-1.42 (m, 1H), 1.32 (s, 9H), 1.30-1.26 (m, 1H);  $^{13}\text{C}$  NMR (126 MHz,  $\text{CDCl}_3$ )  $\delta$  150.5, 135.4, 126.4, 124.9, 79.9, 66.1, 34.6, 32.6, 31.4, 30.8, 25.4, 25.1, 12.3; IR (neat) 2961, 1447, 763, 700  $\text{cm}^{-1}$ ; HRMS (EI+) exact mass calcd for  $\text{C}_{17}\text{H}_{23}\text{O}$ :  $m/z$  243.1749 ( $[\text{M}]^+$ ), found:  $m/z$  243.1748.  $[\alpha]_{\text{D}}^{23.5} = -14.8$  ( $c$  1.24,  $\text{CHCl}_3$ ).

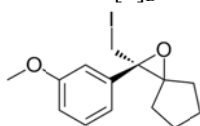

**(R)-2-(iodomethyl)-2-(3-methoxyphenyl)-1-oxaspiro[2.4]heptane (2cc)**

Prepared according to the general procedure E with **1cc** (22.0 mg, 0.1 mmol) over the course of 45 h at  $-20$  °C as a yellow liquid (28.2 mg, 81% yield, 96.5% *ee*). The enantiomeric purity was determined by HPLC analysis (Lux 5 $\mu$  cellulose-4 column, hexane/*i*-PrOH 98:2, 0.7 mL/min,  $t_{\text{major}} = 8.45$  min,  $t_{\text{minor}} = 7.95$  min).  $^1\text{H}$  NMR (500 MHz,  $\text{CDCl}_3$ )  $\delta$  7.27 (t,  $J = 7.5$  Hz, 1H), 6.93 (d,  $J = 7.5$  Hz, 1H), 6.90 (s, 1H), 6.84 (dd,  $J_1 = 7.5, 2.5$  Hz, 1H), 3.82 (s, 3H), 3.69 (d,  $J = 10.0$  Hz, 1H), 3.43 (d,  $J = 10.0$  Hz, 1H), 2.15-2.09 (m, 1H), 1.88-1.86 (m, 1H), 1.83-1.70 (m, 3H), 1.58-1.51 (m, 1H), 1.47-1.41 (m, 1H), 1.33-1.27 (m, 1H);  $^{13}\text{C}$  NMR (126 MHz,  $\text{CDCl}_3$ )  $\delta$  159.4, 140.1, 129.2, 119.0, 113.2, 112.5, 80.1, 66.3, 55.3, 32.6, 30.8, 25.4, 25.1, 11.9; IR (neat) 2961, 1447, 763, 700  $\text{cm}^{-1}$ ; HRMS (EI+) exact mass calcd for  $\text{C}_{14}\text{H}_{17}\text{O}_2\text{I}$ :  $m/z$  344.0273 ( $[\text{M}]^+$ ), found:  $m/z$  344.0269.  $[\alpha]_{\text{D}}^{23.5} = -35.3$  ( $c$  1.09,  $\text{CHCl}_3$ ).

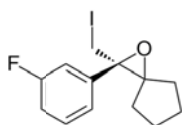

**(R)-2-(3-fluorophenyl)-2-(iodomethyl)-1-oxaspiro[2.4]heptane (2cd)**

Prepared according to the general procedure E with **1cd** (20.5 mg, 0.1 mmol) over the course of 42 h at -20 °C as a yellow liquid (26.7 mg, 81% yield, 96.5% *ee*). The enantiomeric purity was determined by HPLC analysis (Lux 5 $\mu$  cellulose-4 column, hexane/*i*-PrOH 98:2, 0.7 mL/min,  $t_{\text{major}} = 6.56$  min,  $t_{\text{minor}} = 6.27$  min).  $^1\text{H}$  NMR (500 MHz,  $\text{CDCl}_3$ )  $\delta$  7.33 (dt,  $J = 10.0, 7.5$  Hz, 1H), 7.1 (d,  $J = 7.5$  Hz, 1H), 7.07 (dd,  $J = 10.0, 1.5$  Hz, 1H), 7.00 (t,  $J = 7.5$  Hz, 1H), 3.67 (d,  $J = 10.5$  Hz, 1H), 3.42 (d,  $J = 10.5$  Hz, 1H), 2.15-2.09 (m, 1H), 1.89-1.85 (m, 1H), 1.81-1.71 (m, 3H), 1.57-1.54 (m, 1H), 1.44-1.38 (m, 1H), 1.32-1.28 (m, 1H);  $^{13}\text{C}$  NMR (126 MHz,  $\text{CDCl}_3$ )  $\delta$  162.4 (d,  $J = 255.5$  Hz), 141.3, 129.8 (d,  $J = 7.7$  Hz), 122.3 (d,  $J = 2.9$  Hz), 114.7 (d,  $J = 21.0$  Hz), 114.0 (d,  $J = 22.8$  Hz), 80.3, 65.9, 32.5, 30.7, 25.3, 25.1, 11.1;  $^{19}\text{F}$  NMR (376 MHz,  $\text{CDCl}_3$ )  $\delta$  -112.7; IR (neat) 2961, 1447, 763, 700  $\text{cm}^{-1}$ ; HRMS (EI+) exact mass calcd for  $\text{C}_{13}\text{H}_{14}\text{OFI}$ :  $m/z$  332.0073 ( $[\text{M}]^+$ ), found:  $m/z$  332.0070.  $[\alpha]_{\text{D}}^{23.5} = -48.4$  ( $c$  1.03,  $\text{CHCl}_3$ ).

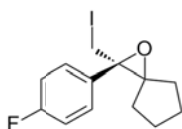

**(R)-2-(4-fluorophenyl)-2-(iodomethyl)-1-oxaspiro[2.4]heptane (2ce)**

Prepared according to the general procedure E with **1ce** (20.2 mg, 0.1 mmol) over the course of 51 h at -20 °C as a yellow liquid (33.2 mg, 97% yield, 96.5% *ee*). The enantiomeric purity was determined by HPLC analysis (ChiralPak PA-2 column, hexane/*i*-PrOH 98:2, 0.7 mL/min,  $t_{\text{major}} = 7.54$  min,  $t_{\text{minor}} = 8.31$  min).  $^1\text{H}$  NMR (500 MHz,  $\text{CDCl}_3$ )  $\delta$  7.35-7.32 (m, 2H), 7.06-7.02 (m, 2H), 3.64 (d,  $J = 10.0$  Hz, 1H), 3.43 (d,  $J = 10.0$  Hz, 1H), 2.15-2.10 (m, 1H), 1.89-1.84 (m, 1H), 1.80-1.71 (m, 3H), 1.58-1.54 (m, 1H), 1.44-1.38 (m, 1H), 1.28-1.22 (m, 1H);  $^{13}\text{C}$  NMR (126 MHz,  $\text{CDCl}_3$ )  $\delta$  162.2 (d,  $J = 246.1$  Hz), 134.4, 128.5 (d,  $J = 8.5$  Hz), 115.1 (d,  $J = 21.0$  Hz), 80.0, 65.8, 32.6, 30.7, 25.4, 25.1, 11.9;  $^{19}\text{F}$  NMR (376 MHz,  $\text{CDCl}_3$ )  $\delta$  -114.3; IR (neat) 2961, 1447, 763, 700  $\text{cm}^{-1}$ ; HRMS (EI+) exact mass calcd for  $\text{C}_{13}\text{H}_{14}\text{OFI}$ :  $m/z$  332.0073 ( $[\text{M}]^+$ ), found:  $m/z$  332.0070.  $[\alpha]_{\text{D}}^{23.5} = -7.1$  ( $c$  1.20,  $\text{CHCl}_3$ ).

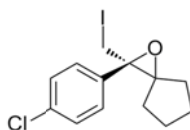

**(R)-2-(4-chlorophenyl)-2-(iodomethyl)-1-oxaspiro[2.4]heptane (2cf)**

Prepared according to the general procedure E with **1cf** (22.5 mg, 0.1 mmol) over the course of 51 h at -20 °C as a yellow liquid (32.5 mg, 92% yield, 98% *ee*). The enantiomeric purity was determined by HPLC analysis (ChiralPak PA-2 column, hexane/*i*-PrOH 98:2, 0.7 mL/min,  $t_{\text{major}} = 8.17$  min,  $t_{\text{minor}} = 9.39$  min).  $^1\text{H}$  NMR (500 MHz,  $\text{CDCl}_3$ )  $\delta$  7.34-7.29 (m, 4H), 3.65 (d,  $J = 10.0$  Hz, 1H), 3.42 (d,  $J = 10.0$  Hz, 1H), 2.15-2.09 (m, 1H), 1.89-1.85 (m, 1H), 1.79-1.71 (m, 3H), 1.58-1.55 (m, 1H), 1.43-1.37 (m, 1H), 1.29-1.23 (m, 1H);  $^{13}\text{C}$  NMR (126 MHz,  $\text{CDCl}_3$ )  $\delta$  137.2, 133.6, 128.4, 128.1, 80.1, 65.9, 32.6, 30.7, 25.3, 25.1, 11.4; IR (neat) 2961, 1447, 763, 700  $\text{cm}^{-1}$ ; HRMS (EI+) exact mass calcd for  $\text{C}_{13}\text{H}_{14}\text{OClI}$ :  $m/z$  347.9778 ( $[\text{M}]^+$ ), found:  $m/z$  347.9781.  $[\alpha]_{\text{D}}^{23.5} = -5.2$  ( $c$  1.22,  $\text{CHCl}_3$ ).



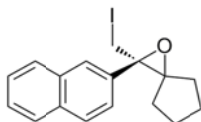

**(R)-2-(iodomethyl)-2-(naphthalen-2-yl)-1-oxaspiro[2.4]heptane (2cg)**

Prepared according to the general procedure E with **1cg** (23.6 mg, 0.1 mmol) over the course of 45 h at -20 °C as a yellow liquid (27.7 mg, 75% yield, 94% *ee*). The enantiomeric purity was determined by HPLC analysis (Lux 5 $\mu$  cellulose-4 column, hexane/*i*-PrOH 98:2, 0.7 mL/min,  $t_{\text{major}} = 7.93$  min,  $t_{\text{minor}} = 7.07$  min).  $^1\text{H}$  NMR (500 MHz,  $\text{CDCl}_3$ )  $\delta$  7.87-7.84 (m, 4H), 7.51-7.46 (m, 3H), 3.83 (d,  $J = 10.0$  Hz, 1H), 3.53 (d,  $J = 10.0$  Hz, 1H), 2.20-2.16 (m, 1H), 1.94-1.71 (m, 4H), 1.60-1.51 (m, 1H), 1.47-1.41 (m, 1H), 1.34-1.27 (m, 1H);  $^{13}\text{C}$  NMR (126 MHz,  $\text{CDCl}_3$ )  $\delta$  136.1, 133.0, 132.9, 128.1, 127.9, 127.7, 126.3, 126.1, 126.0, 124.4, 80.3, 66.5, 32.7, 30.8, 25.4, 25.1, 12.0; IR (neat) 2959, 1422, 816, 654  $\text{cm}^{-1}$ ; HRMS (EI+) exact mass calcd for  $\text{C}_{17}\text{H}_{17}\text{OI}$ :  $m/z$  364.0324 ( $[\text{M}]^+$ ), found:  $m/z$  364.0328.  $[\alpha]_{\text{D}}^{23.5} = -6.5$  (*c* 1.24,  $\text{CHCl}_3$ ).

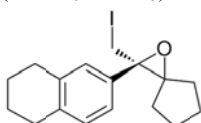

**(R)-2-(iodomethyl)-2-(5,6,7,8-tetrahydronaphthalen-2-yl)-1-oxaspiro[2.4]heptane (2ch)**

Prepared according to the general procedure E with **1ch** (23.9 mg, 0.1 mmol) over the course of 45 h at -20 °C as a yellow liquid (27.7 mg, 76% yield, 91% *ee*). The enantiomeric purity was determined by HPLC analysis (Lux 5 $\mu$  cellulose-4 column, hexane/*i*-PrOH 98:2, 0.7 mL/min,  $t_{\text{major}} = 6.95$  min,  $t_{\text{minor}} = 6.25$  min).  $^1\text{H}$  NMR (500 MHz,  $\text{CDCl}_3$ )  $\delta$  7.06-7.01 (m, 3H), 3.67 (d,  $J = 10.0$  Hz, 1H), 3.44 (d,  $J = 10.0$  Hz, 1H), 2.80-2.72 (m, 4H), 2.14-2.10 (m, 1H), 1.88-1.85 (m, 1H), 1.81-1.72 (m, 6H), 1.58-1.53 (m, 2H), 1.49-1.42 (m, 1H), 1.32-1.26 (m, 1H);  $^{13}\text{C}$  NMR (126 MHz,  $\text{CDCl}_3$ )  $\delta$  136.9, 136.5, 135.4, 128.7, 127.2, 123.8, 79.9, 66.2, 32.7, 30.8, 29.5, 29.2, 25.4, 25.1, 23.2, 12.6.; IR (neat) 2926, 1434, 825, 603  $\text{cm}^{-1}$ ; HRMS (EI+) exact mass calcd for  $\text{C}_{17}\text{H}_{21}\text{OI}$ :  $m/z$  368.0637 ( $[\text{M}]^+$ ), found:  $m/z$  368.0633.  $[\alpha]_{\text{D}}^{23.5} = -5.5$  (*c* 1.27,  $\text{CHCl}_3$ ).

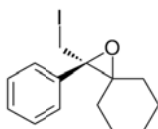

**(R)-2-(iodomethyl)-2-phenyl-1-oxaspiro[2.5]octane (2d)**

Prepared according to the general procedure E with **1d** (20.4 mg, 0.1 mmol) over the course of 44 h at -20 °C as a yellow liquid (32.7 mg, 98% yield, 92% *ee*). The enantiomeric purity was determined by HPLC analysis (ChiralPak OD-H column, hexane/*i*-PrOH 98:2, 0.7 mL/min,  $t_{\text{major}} = 6.56$  min,  $t_{\text{minor}} = 7.01$  min).  $^1\text{H}$  NMR (500 MHz,  $\text{CDCl}_3$ )  $\delta$  7.39-7.29 (m, 5H), 3.63-3.59 (m, 2H), 1.89-1.70 (m, 4H), 1.53-1.47 (m, 3H), 1.44-1.39 (m, 1H), 1.22-1.19 (m, 2H);  $^{13}\text{C}$  NMR (126 MHz,  $\text{CDCl}_3$ )  $\delta$  138.5, 128.0, 127.6, 72.8, 68.8, 32.6, 30.8, 25.4, 25.3, 24.4, 11.5; IR (neat) 2930, 1447, 703, 576  $\text{cm}^{-1}$ ; HRMS (EI+) exact mass calcd for  $\text{C}_{14}\text{H}_{17}\text{O}$ :  $m/z$  201.1279 ( $[\text{M}]^+$ ), found:  $m/z$  201.1275.  $[\alpha]_{\text{D}}^{23.5} = -36.9$  (*c* 0.64,  $\text{CHCl}_3$ ).

**Gram scale synthesis of 2d:** At nitrogen atmosphere,  $\text{CH}_2\text{Cl}_2$  (30 mL) was added to a mixture of ion pair catalyst **C1** (269 mg, 0.25 mmol), ammonium salt **A8** (101 mg, 0.25 mmol) and NIS (1.34 g, 6.0 mmol) under -20 °C. After the mixture stirred for 5 min, **1d** (1.0 g) in  $\text{CH}_2\text{Cl}_2$  (3.0 mL) was added dropwise. After 48 h, the reaction was quenched by the addition of  $\text{Na}_2\text{S}_2\text{O}_3$  aqueous solution. The organic layer

was separated, and the aqueous layer was extracted with ethyl acetate for three times. Then the organic layer combined washed with brine, dried over Na<sub>2</sub>SO<sub>4</sub>, filtered and then concentrated. The residue was purified by column chromatography (ethyl acetate/petroleum ether = 1:100, v/v) to afford 1.47 g (90% yield) yellow liquid. Enantiomeric excess was found to be 90% measured by chiral HPLC (ChiralPak OD-H column, hexane/*i*-PrOH 98:2 0.7 mL/min, *t*<sub>major</sub> = 6.02 min, *t*<sub>minor</sub> = 6.38 min).

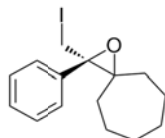

**(R)-2-(iodomethyl)-2-phenyl-1-oxaspiro[2.6]nonane (2e)**

Prepared according to the general procedure E with **1e** (21.7 mg, 0.1 mmol) over the course of 44 h at -20 °C as a yellow liquid (31.2 mg, 91% yield, 98% *ee*). The enantiomeric purity was determined by HPLC analysis (ChiralPak IC column, hexane/*i*-PrOH 95:5, 0.7 mL/min, *t*<sub>major</sub> = 6.72 min, *t*<sub>minor</sub> = 5.92 min). <sup>1</sup>H NMR (500 MHz, CDCl<sub>3</sub>) δ 7.37-7.30 (m, 5H), 3.64 (d, *J* = 10.0 Hz, 1H), 3.59 (d, *J* = 10.0 Hz, 1H), 2.09-2.04 (m, 1H), 1.97-1.92 (m, 1H), 1.84-1.79 (m, 1H), 1.65-1.59 (m, 4H), 1.50-1.44 (m, 2H); 1.38-1.26 (m, 3H); <sup>13</sup>C NMR (126 MHz, CDCl<sub>3</sub>) δ 138.8, 128.0, 127.6, 127.2, 74.6, 68.7, 34.2, 33.2, 29.2, 28.8, 24.7, 24.0, 12.5; IR (neat) 2924, 1447, 703, 573 cm<sup>-1</sup>; HRMS (EI+) exact mass calcd for C<sub>15</sub>H<sub>19</sub>O: *m/z* 215.1436 ([M-I]<sup>+</sup>), found: *m/z* 215.1440. [*α*]<sub>D</sub><sup>23.5</sup> = -54.5 (*c*, 0.70, CHCl<sub>3</sub>).

**Gram scale synthesis of 2e:** At nitrogen atmosphere, CH<sub>2</sub>Cl<sub>2</sub> (25 mL) was added to a mixture of ion pair catalyst **C1** (252 mg, 0.23 mmol), ammonium salt **A8** (95 mg, 0.23 mmol) and NIS (1.25 g, 5.54 mmol) under -20 °C. After the mixture stirred for one minute, **1e** (1.0 g) in CH<sub>2</sub>Cl<sub>2</sub> (3.0 mL) was added dropwise. After 50 h, the reaction was quenched by the addition of Na<sub>2</sub>S<sub>2</sub>O<sub>3</sub> aqueous solution. The organic layer was separated, and the aqueous layer was extracted with ethyl acetate for three times. Then the organic layer combined washed with brine, dried over Na<sub>2</sub>SO<sub>4</sub>, filtered and then concentrated. The residue was purified by column chromatography (ethyl acetate/petroleum ether = 1:100, v/v) to afford 1.40 g (89% yield) yellow liquid. Enantiomeric excess was found to be 98% measured by chiral HPLC (ChiralPak IC column, hexane/*i*-PrOH 95:5 0.7 mL/min, *t*<sub>major</sub> = 6.63 min, *t*<sub>minor</sub> = 5.86 min).

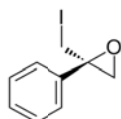

**(R)-2-(iodomethyl)-2-phenyloxirane (2f)**

Prepared according to the general procedure E with **1f** (13.5 mg, 0.1 mmol) over the course of 56 h at -20 °C as a yellow liquid (10.7 mg, 41% yield, 63% *ee*). The enantiomeric purity was determined by HPLC analysis (ChiralPak AD-H column, hexane/*i*-PrOH 98.5:1.5 0.7 mL/min, *t*<sub>major</sub> = 23.06 min, *t*<sub>minor</sub> = 20.66 min). <sup>1</sup>H NMR (500 MHz, CDCl<sub>3</sub>) δ 7.38 (d, *J* = 7.5 Hz, 2H), 7.33 (t, *J* = 7.5 Hz, 2H), 7.29 (d, *J* = 7.5 Hz, 1H), 4.09 (d, *J* = 10.0 Hz, 1H), 4.04 (d, *J* = 10.0 Hz, 1H), 3.90 (d, *J* = 10.0 Hz, 1H), 3.56 (d, *J* = 10.0 Hz, 1H); <sup>13</sup>C NMR (126 MHz, CDCl<sub>3</sub>) δ 138.5, 128.6, 128.1, 126.0, 73.7, 65.8, 12.9; IR (neat) 2961, 1447, 765, 574 cm<sup>-1</sup>; HRMS (EI+) exact mass calcd for C<sub>9</sub>H<sub>9</sub>O: *m/z* 133.1672 ([M-I]<sup>+</sup>), found: *m/z* 133.1674. [*α*]<sub>D</sub><sup>23.5</sup> = -4.6 (*c* 0.31, CHCl<sub>3</sub>).

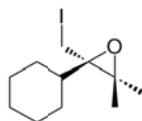

**(R)-2-cyclohexyl-2-(iodomethyl)-3,3-dimethyloxirane (2g)**

Prepared according to the general procedure E with **1g** (16.8 mg, 0.1 mmol) over the course of 74 h at

-20 °C as a yellow liquid (20.9 mg, 71% yield, 37% *ee*). The enantiomeric purity was determined by HPLC analysis (ChiralPak AD-H column, hexane/*i*-PrOH 98:2, 0.7 mL/min,  $t_{\text{major}} = 5.87$  min,  $t_{\text{minor}} = 6.37$  min).  $^1\text{H}$  NMR (500 MHz,  $\text{CDCl}_3$ )  $\delta$  3.56 (d,  $J = 10.0$  Hz, 1H), 3.02 (d,  $J = 10.0$  Hz, 1H), 1.89-1.60 (m, 5H), 1.50 (tt,  $J = 10.0, 2.5$  Hz, 1H), 1.39 (s, 3H), 1.37 (s, 3H), 1.36-1.35 (m, 1H), 1.27-1.19 (m, 3H);  $^{13}\text{C}$  NMR (126 MHz,  $\text{CDCl}_3$ )  $\delta$  66.6, 66.0, 43.5, 31.3, 28.6, 27.1, 26.5, 26.3, 22.3, 20.3, 2.6; IR (neat) 2961, 1447, 763, 633  $\text{cm}^{-1}$ ; HRMS (EI+) exact mass calcd for  $\text{C}_{11}\text{H}_{19}\text{OI}$ :  $m/z$  294.0481 ( $[\text{M-I}]^+$ ), found:  $m/z$  294.0479.  $[\alpha]_{\text{D}}^{23.5} = -10.5$  ( $c$  0.52,  $\text{CHCl}_3$ ).

## 5. Wagner-Meerwein Rearrangement of epoxide and one-pot procedure

### 5.1 Wagner-Meerwein Rearrangement of 2c.

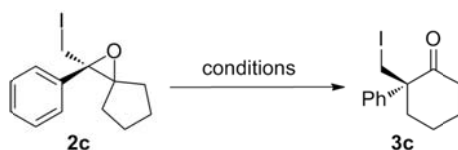

**Table S6. Optimization of the rearrangement of 2c<sup>[a]</sup>**

| entry            | Cat                                           | solvent | C (mmol/ml) | T (°C) | t (h) | ee (%) <sup>[b]</sup> |
|------------------|-----------------------------------------------|---------|-------------|--------|-------|-----------------------|
| 1                | BF <sub>3</sub> ·Et <sub>2</sub> O (1 equiv)  | DCM     | 0.1         | 0      | 1.5   | 91                    |
| 2                | BF <sub>3</sub> ·Et <sub>2</sub> O (5 equiv)  | DCM     | 0.1         | 0      | 1.5   | 91                    |
| 3                | BF <sub>3</sub> ·Et <sub>2</sub> O (10 equiv) | DCM     | 0.1         | 0      | 1.5   | 89                    |
| 4                | BF <sub>3</sub> ·Et <sub>2</sub> O (1 equiv)  | DCM     | 0.1         | rt     | 1.5   | 90                    |
| 5                | BF <sub>3</sub> ·Et <sub>2</sub> O (1 equiv)  | DCM     | 0.1         | -20    | 2     | 91                    |
| 6                | BF <sub>3</sub> ·Et <sub>2</sub> O (1 equiv)  | DCM     | 0.1         | -78    | 3     | 92                    |
| 7                | BF <sub>3</sub> ·Et <sub>2</sub> O (1 equiv)  | DCM     | 0.05        | -78    | 3     | 92                    |
| 8 <sup>[b]</sup> | BF <sub>3</sub> ·Et <sub>2</sub> O (1 equiv)  | DCM     | 0.05        | 0      | 1.5   | 92                    |
| 9                | BF <sub>3</sub> ·Et <sub>2</sub> O (1 equiv)  | DCM     | 0.005       | 0      | 1.5   | 93                    |
| 10               | BF <sub>3</sub> ·Et <sub>2</sub> O (1 equiv)  | Tol     | 0.05        | 0      | 1.5   | 90                    |
| 11               | BF <sub>3</sub> ·Et <sub>2</sub> O (1 equiv)  | Hex     | 0.05        | 0      | 1.5   | 90                    |
| 12               | AlEtCl <sub>2</sub> (1 equiv)                 | DCM     | 0.05        | 0      | 1.5   | 32                    |
| 13               | TMSOTf (1 equiv)                              | DCM     | 0.05        | 0      | 1.5   | 92                    |
| 14               | TBSOTf (1 equiv)                              | DCM     | 0.05        | 0      | 1.5   | 89                    |

[a] Reactions were performed with 2c in solvent at indicated concentration by addition of Lewis acid at indicated temperature (0.1 mmol). [b] Determined by HPLC using Lux 5 $\mu$  cellulose-4 column. [b] Entry 8 was selected as the optimal condition.

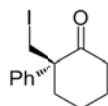

#### (S)-2-(iodomethyl)-2-phenylcyclohexanone (3c)

To a stirred solution of **2c** (31.4 mg, 0.1 mmol) in 2ml CH<sub>2</sub>Cl<sub>2</sub> under nitrogen atmosphere at 0°C was added boron trifluoride etherate (10  $\mu$ l, 0.1 mmol). Two hours later, saturated aqueous NaHCO<sub>3</sub> was added to the solution, and the resulting mixture was extracted with CH<sub>2</sub>Cl<sub>2</sub>. The organic layer was washed with brine, dried over Na<sub>2</sub>SO<sub>4</sub>, and evaporated in vacuo<sup>[3b]</sup>. The residue was purified by preparative column chromatography (ethyl acetate/petroleum ether = 1/30, v/v) and gave **3c** as a red brown liquid (29.1 mg, 93% yield, 93% ee for 0.1 mmol scale). The enantiomeric purity was determined by HPLC analysis (Lux 5 $\mu$  cellulose-4 column, hexane/*i*-PrOH 98:2, 0.7 mL/min,  $t_{\text{major}}$  = 10.21 min,  $t_{\text{minor}}$  = 11.52 min). <sup>1</sup>H NMR (500 MHz, CDCl<sub>3</sub>)  $\delta$  7.37 (t,  $J$  = 7.5 Hz, 2H), 7.31 (d,  $J$  = 7.5 Hz, 1H), 7.20 (d,  $J$  = 7.5 Hz, 2H), 3.61 (d,  $J$  = 10.0 Hz, 1H), 3.37 (d,  $J$  = 10.0 Hz, 1H), 2.81 (dq,  $J$  = 15.0, 3.0 Hz, 1H), 2.34-2.25 (m, 2H), 1.96-1.87 (m, 2H), 1.80-1.74 (m, 2H), 1.74-1.68 (m, 3H). <sup>13</sup>C NMR (126 MHz, CDCl<sub>3</sub>)  $\delta$  210.2, 138.2, 129.1, 127.7, 126.8, 56.2, 40.2, 36.3, 27.8, 21.8, 19.5; IR (neat) 2939, 1704, 1448, 701 cm<sup>-1</sup>; HRMS (ESI+) exact mass calcd for C<sub>13</sub>H<sub>16</sub>IO:  $m/z$  315.0246 ([M+H]<sup>+</sup>), found:  $m/z$  315.0247;  $[\alpha]_{\text{D}}^{23.5}$  = 104.7 ( $c$  0.44, CHCl<sub>3</sub>).

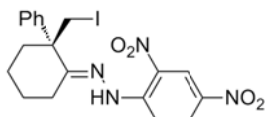

**(*S,E*)-1-(2,4-dinitrophenyl)-2-(2-(iodomethyl)-2-phenylcyclohexylidene)hydrazine (4)**

To a solution of **3c** (31.3 mg, 0.1 mmol) in EtOH/H<sub>2</sub>O (1.8 mL/0.6 mL), 2,4-dinitrophenylhydrazine (36.4, mg, 0.12 mmol, wetted with 50% water) and con.H<sub>2</sub>SO<sub>4</sub> (0.2 mL) were added. The mixture was stirred at rt for 4 h. Then H<sub>2</sub>O (3 mL) was added. The organic layer was extracted with ethyl acetate and washed with saturated NaHCO<sub>3</sub> (aq.), brine, dried over Na<sub>2</sub>SO<sub>4</sub>, filtered and then concentrated<sup>[1d]</sup>. The residue was purified by silica gel column chromatography (ethyl acetate/petroleum ether = 1:15, v/v) to afford the title product as a yellow solid (42.9 mg, 87% yield, 94% *ee*). The enantiomeric purity was determined by HPLC analysis (ChiralPak ID3 column, hexane/*i*-PrOH 9:1, 0.7 mL/min, *t*<sub>major</sub> = 12.51 min, *t*<sub>minor</sub> = 11.34 min). <sup>1</sup>H NMR (500 MHz, CDCl<sub>3</sub>) δ 11.41 (s, 1H), 9.17 (s, 1H), 8.39 (d, *J* = 10.0 Hz, 1H), 8.22 (d, *J* = 10.0 Hz, 1H), 7.38 (t, *J* = 7.5 Hz, 2H), 7.32 (t, *J* = 7.5 Hz, 1H), 7.38 (d, *J* = 7.5 Hz, 2H), 3.84 (d, *J* = 10.0 Hz, 1H), 3.48 (d, *J* = 10.0 Hz, 1H), 2.82 (d, *J* = 15.0 Hz, 1H), 2.68 (d, *J* = 15.0 Hz, 1H), 2.09-2.03 (m, 1H), 1.98-1.91 (m, 2H), 1.85-1.78 (m, 1H), 1.73-1.66 (m, 1H), 1.59-1.57 (m, 1H); <sup>13</sup>C NMR (126 MHz, CDCl<sub>3</sub>) δ 160.1, 145.6, 139.8, 138.1, 130.3, 129.2, 127.7, 127.0, 123.5, 117.0, 50.3, 36.3, 29.7, 26.2, 25.1, 21.7, 19.8; IR (neat) 3323, 2934, 1617, 1336, 7442 cm<sup>-1</sup>; HRMS (ESI+) exact mass calcd for C<sub>19</sub>H<sub>20</sub>O<sub>4</sub>N<sub>4</sub>I: *m/z* 495.0518 ([M+H]<sup>+</sup>), found: *m/z* 495.0524. [α]<sub>D</sub><sup>23.5</sup> = 126.4 (*c* 0.55, CHCl<sub>3</sub>).

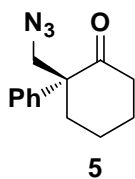

To a flask charged with NaN<sub>3</sub> (7.8 mg, 0.12 mmol, in 1mL DMSO) was added a solution of **5** (31.2mg, 0.1 mmol) in 1ml DMSO under nitrogen. The mixture was stirred at 80 °C for 5 hours and cooled to room temperature. Then the reaction was washed with water for 3 times, dried under reduced pressure<sup>[3a]</sup>. The residue was purified by preparative column chromatography (ethyl acetate/petroleum ether = 1:30, v/v) and gave **6** as a colorless liquid (20.3 mg, 86% yield, 92% *ee*). The enantiomeric purity was determined by HPLC analysis (Lux 5μ cellulose-4 column, hexane/*i*PrOH 98:2, 0.7 mL/min, *t*<sub>major</sub> = 10.45 min, *t*<sub>minor</sub> = 11.46 min). <sup>1</sup>H NMR (500 MHz, CDCl<sub>3</sub>) δ 7.39 (t, *J* = 7.5 Hz, 2H), 7.34–7.28 (m, 1H), 7.22 (d, *J* = 7.5 Hz, 2H), 3.63 (d, *J* = 12.5 Hz, 1H), 3.34 (d, *J* = 12.5 Hz, 1H), 2.74 (dd, *J* = 14.4, 2.5 Hz, 1H), 2.39-2.26 (m, 2H), 2.00-1.86 (m, 2H), 1.82-1.66 (m, 3H); <sup>13</sup>C NMR (126 MHz, CDCl<sub>3</sub>) δ 211.8, 137.9, 129.2, 127.7, 126.9, 59.9, 58.0, 39.9, 32.8, 27.9, 21.2; HRMS (ESI+) exact mass calcd for C<sub>13</sub>H<sub>16</sub>N<sub>3</sub>O: *m/z* 230.1293 ([M+H]<sup>+</sup>), found: *m/z* 230.1297; IR (neat) 2939, 2102, 1708, 702 cm<sup>-1</sup>; [α]<sub>D</sub><sup>23.5</sup> = 136.1 (*c* 0.34, CHCl<sub>3</sub>).

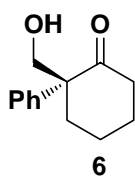

A flask charged with AgBF<sub>4</sub> (0.13 mmol) in CH<sub>3</sub>NO<sub>2</sub> (1mL) under nitrogen atmosphere was added **5** (31.4mg, 0.1mmol, in 0.4 mL DMF). Then stirred at 40 °C for 4.5 h in dark and filtered through a short

pad of celite. The filtrate was washed successively with water, brine, and then dried. The obtained residue was dissolved in methanol, added Na<sub>2</sub>CO<sub>3</sub> and stirred at room temperature for 1h. After the addition of water (2 ml), the solution was extracted with DCM. The organic layers were washed with water, brine and dried over Na<sub>2</sub>SO<sub>4</sub>. Evaporation of the solvent gave the corresponding alcohol, which could be purified by chromatography (ethyl acetate/petroleum ether = 1:6, v/v) as a colorless liquid (23.2 mg, 74% yield, 91% *ee*). The enantiomeric purity was determined by HPLC analysis (Lux 5 $\mu$  cellulose-4 column, hexane/*i*PrOH 4:1, 0.7 mL/min,  $t_{\text{major}}$  = 9.14 min,  $t_{\text{minor}}$  = 8.19 min). <sup>1</sup>H NMR (500 MHz, CDCl<sub>3</sub>)  $\delta$  7.31-7.16 (m, 5H), 3.85 (s, 1H), 3.14 (d,  $J$  = 13.5 Hz, 1H), 2.97 (d,  $J$  = 13.5 Hz, 1H), 2.73-2.66 (m, 1H), 2.56-2.53 (m, 1H), 2.26-2.11 (m, 2H), 1.91-1.86 (m, 2H), 1.69-1.65 (m, 2H); <sup>13</sup>C NMR (126 MHz, CDCl<sub>3</sub>)  $\delta$  213.2, 135.3, 130.0, 128.2, 127.0, 79.3, 43.3, 40.4, 38.6, 28.0, 22.8; HRMS (ESI+) exact mass calcd for C<sub>13</sub>H<sub>16</sub>NaO<sub>2</sub>:  $m/z$  227.1048 ([M+Na]<sup>+</sup>), found:  $m/z$  227.1049; IR (neat) 3448, 2920, 1709, 702, 669 cm<sup>-1</sup>; [ $\alpha$ ]<sub>D</sub><sup>23.5</sup> = 50.0 ( $c$  0.42, CHCl<sub>3</sub>)

## 5.2 one-pot iodo-etherification/Wagner-Meerwein rearrangement reaction

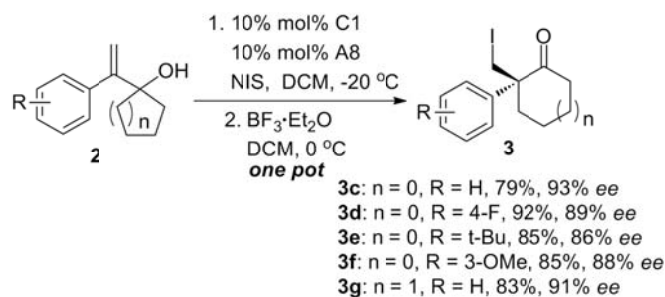

**General procedure F:** In a Schlenk tube, ion pair catalyst **C1** (0.01 mmol), ammonium salt **A8** (0.01 mmol), NIS (0.12 mmol) and CH<sub>2</sub>Cl<sub>2</sub> (1 mL) was added, then the reaction mixture was cooled to -20 °C. Allyl alcohol **1** (0.1 mmol) in 1 mL CH<sub>2</sub>Cl<sub>2</sub> was added dropwise. As the substrate disappeared indicated by TLC, boron trifluoride etherate (0.1 mmol) was added dropwise to the mixture at 0 °C. After 2.5 h, the solvent was removed under reduced pressure, and the residue was purified by silica gel column chromatography (ethyl acetate/petroleum ether = 1:25, v/v) to afford the product.

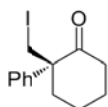

### (S)-2-(iodomethyl)-2-phenylcyclohexanone (**3c**)

Prepared according to the general procedure **F** with **2c** (31.4 mg, 0.1 mmol) as a pale yellow liquid (24.8 mg, 79% yield, 93% *ee*). The enantiomeric purity was determined by HPLC analysis (Lux 5 $\mu$  cellulose-4 column, hexane/*i*-PrOH 98:2, 0.7 mL/min,  $t_{\text{major}}$  = 10.59 min,  $t_{\text{minor}}$  = 12.38 min). The product shows no difference in spectra with those of **3c** obtained by stepwise reaction.

**2.7mmol scale synthesis of 3c:** In a Schlenk tube, ion pair catalyst **C1** (150 mg, 0.014 mmol), ammonium salt **A8** (58 mg, 0.014 mmol), NIS (720 mg, 3.2 mmol) and CH<sub>2</sub>Cl<sub>2</sub> (50 mL) was added, then the reaction mixture was cooled to -20 °C. Allyl alcohol **1** (500 mg, 2.66 mmol) in 5 mL CH<sub>2</sub>Cl<sub>2</sub> was added dropwise. After 39h boron trifluoride etherate (120 mg, 104  $\mu$ l, 0.9 mmol) was added dropwise to the mixture at 0 °C. After 2.5 h the reaction was quenched with saturated Na<sub>2</sub>S<sub>2</sub>O<sub>3</sub>. The organic layer was separated and organic layer washed with CH<sub>2</sub>Cl<sub>2</sub> for two times. Combined the organic layer, washed with brine, dried over Na<sub>2</sub>SO<sub>4</sub> and evaporated under reduced pressure. The residue was purified by silica gel column chromatography (ethyl acetate/petroleum ether = 1:100, v/v) to afford the product (685 mg, 2.18 mmol, 82% yield, 92% *ee*). Enantiomeric excess was found to be 92%

measured by chiral HPLC (Lux 5 $\mu$  cellulose-4 column, hexane/*i*-PrOH 98:2, 0.7 mL/min,  $t_{\text{major}} = 10.47$  min,  $t_{\text{minor}} = 12.18$  min).

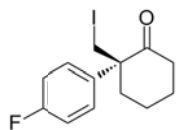

**(S)-2-(4-fluorophenyl)-2-(iodomethyl)cyclohexanone (3d)**

Prepared according to the general procedure **F** with **2ce** (22.3 mg, 0.1 mmol) as a white solid (32.2 mg, 92% yield, 89% *ee*). The enantiomeric purity was determined by HPLC analysis (ChiralPak IF-3 column, hexane/*i*PrOH 98:2, 0.7 mL/min,  $t_{\text{major}} = 9.96$  min,  $t_{\text{minor}} = 13.29$  min).  $^1\text{H}$  NMR (500 MHz,  $\text{CDCl}_3$ )  $\delta$  7.18–7.16 (m, 2H), 7.08–7.04 (m, 2H), 3.57 (dd,  $J = 10.0, 1.5$  Hz, 1H), 3.37 (dd,  $J = 10.0, 1.5$  Hz, 1H), 2.82–2.75 (m, 1H), 2.31–2.26 (m, 2H), 1.96–1.68 (m, 5H);  $^{13}\text{C}$  NMR (126 MHz,  $\text{CDCl}_3$ )  $\delta$  210.1, 162.2 (d,  $J = 247.7$  Hz), 134.1 (d,  $J = 3.4$  Hz), 128.7 (d,  $J = 8.1$  Hz), 116.1 (d,  $J = 21.4$  Hz), 55.6, 40.1, 36.5, 27.8, 21.8, 19.7;  $^{19}\text{F}$  NMR (376 MHz,  $\text{CDCl}_3$ )  $\delta$  -114.3; IR (neat) 2942, 1721, 1443, 678  $\text{cm}^{-1}$ ; HRMS (ESI+) exact mass calcd for  $\text{C}_{13}\text{H}_{15}\text{FIO}^+$ :  $m/z$  333.0152 ( $[\text{M}+\text{H}]^+$ ), found:  $m/z$  333.0152.  $[\alpha]_{\text{D}}^{23.5} = 87.3$  (c 0.94,  $\text{CHCl}_3$ ).

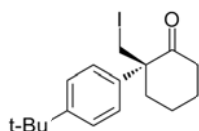

**(S)-2-(4-(tert-butyl)phenyl)-2-(iodomethyl)cyclohexanone (3e)**

Prepared according to the general procedure **F** with **2cb** (37.0 mg, 0.1 mmol) as a white solid (31.5 mg, 85% yield, 86% *ee*). The enantiomeric purity was determined by HPLC analysis (Lux 5 $\mu$  cellulose-4 column, hexane/*i*-PrOH 99:1, 0.7 mL/min,  $t_{\text{major}} = 7.79$  min,  $t_{\text{minor}} = 9.01$  min).  $^1\text{H}$  NMR (500 MHz,  $\text{CDCl}_3$ )  $\delta$  7.36 (d,  $J = 7.5$  Hz, 2H), 7.11 (d,  $J = 7.5$  Hz, 2H), 3.63 (d,  $J = 10.0$  Hz, 1H), 3.29 (d,  $J = 10.0$  Hz, 1H), 2.81–2.71 (m, 1H), 2.35–2.26 (m, 2H), 2.00–1.87 (m, 2H), 1.82–1.74 (m, 2H), 1.74–1.64 (m, 2H), 1.30 (s, 9H);  $^{13}\text{C}$  NMR (126 MHz,  $\text{CDCl}_3$ )  $\delta$  210.2, 150.7, 134.9, 126.4, 126.0, 55.8, 40.0, 36.2, 34.5, 31.3, 27.7, 21.8, 19.2; IR (neat) 2933, 1692, 1447, 683  $\text{cm}^{-1}$ ; HRMS (ESI+) exact mass calcd for  $\text{C}_{17}\text{H}_{24}\text{IO}^+$ :  $m/z$  371.0872 ( $[\text{M}+\text{H}]^+$ ), found:  $m/z$  371.0876.  $[\alpha]_{\text{D}}^{23.5} = 69.5$  (c 0.97,  $\text{CHCl}_3$ ).

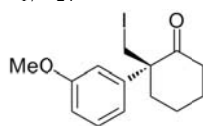

**(S)-2-(iodomethyl)-2-(3-methoxyphenyl)cyclohexanone (3f)**

Prepared according to the general procedure **F** with **2cc** (34.4 mg, 0.1 mmol) as a white solid (27.3 mg, 85% yield, 88% *ee*). The enantiomeric purity was determined by HPLC analysis (Lux 5 $\mu$  cellulose-4 column, hexane/*i*-PrOH 99:1, 0.7 mL/min,  $t_{\text{major}} = 13.31$  min,  $t_{\text{minor}} = 16.75$  min).  $^1\text{H}$  NMR (500 MHz,  $\text{CDCl}_3$ )  $\delta$  7.28 (t,  $J = 8.0$  Hz, 1H), 6.84 (d,  $J = 8.0$  Hz, 1H), 6.78 (d,  $J = 8.0$  Hz, 1H), 6.74 (s, 1H), 3.80 (s, 3H), 3.59 (d,  $J = 10.0$  Hz, 1H), 3.36 (d,  $J = 10.0$  Hz, 1H), 2.81–2.74 (m, 1H), 2.35–2.27 (m, 2H), 1.98–1.86 (m, 2H), 1.83–1.77 (m, 2H), 1.74–1.63 (m, 1H);  $^{13}\text{C}$  NMR (126 MHz,  $\text{CDCl}_3$ )  $\delta$  210.0, 160.1, 139.7, 130.1, 119.1, 113.2, 112.5, 56.1, 55.3, 40.2, 36.4, 27.7, 21.8, 19.2; IR (neat) 2937, 1712, 1437, 692  $\text{cm}^{-1}$ ; HRMS (ESI+) exact mass calcd for  $\text{C}_{14}\text{H}_{18}\text{IO}_2^+$ :  $m/z$  345.0351 ( $[\text{M}+\text{H}]^+$ ), found:  $m/z$  345.0352.  $[\alpha]_{\text{D}}^{23.5} = 79.7$  (c 0.92,  $\text{CHCl}_3$ ).

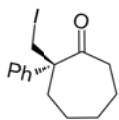

**(S)-2-(iodomethyl)-2-phenylcycloheptanone (3g)**

Prepared according to the general procedure **F** with **2d** (20.2 mg, 0.1 mmol) as a pale yellow liquid (27.2 mg, 83% yield, 91% *ee*). The enantiomeric purity was determined by HPLC analysis (Lux 5 $\mu$  cellulose-4 column, hexane/*i*-PrOH 98:2, 0.7 mL/min,  $t_{\text{major}} = 8.37$  min,  $t_{\text{minor}} = 10.50$  min).  $^1\text{H}$  NMR (500 MHz,  $\text{CDCl}_3$ )  $\delta$  7.35 (t,  $J = 7.5$  Hz, 2H), 7.29 (t,  $J = 7.5$  Hz, 1H), 7.20 (d,  $J = 7.5$  Hz, 2H), 3.81 (d,  $J = 10.0$  Hz, 1H), 3.54 (d,  $J = 10.0$  Hz, 1H), 2.59-2.51 (m, 2H), 2.35-2.33 (m, 1H), 2.23-2.18 (m, 1H), 1.96-1.93 (m, 1H), 1.86-1.81 (m, 2H), 1.62-1.44 (m, 3H), 1.27-1.22 (m, 1H);  $^{13}\text{C}$  NMR (126 MHz,  $\text{CDCl}_3$ )  $\delta$  210.8, 140.5, 128.7, 127.7, 126.8, 58.6, 41.6, 33.1, 30.4, 26.8, 24.2, 19.3; IR (neat) 2936, 1702, 1048, 706  $\text{cm}^{-1}$ ; HRMS (ESI+) exact mass calcd for  $\text{C}_{13}\text{H}_{16}\text{IO}$ :  $m/z$  329.0402 ( $[\text{M}+\text{H}]^+$ ), found:  $m/z$  329.0405.  $[\alpha]_{\text{D}}^{23.5} = 94.7$  ( $c$  0.53,  $\text{CHCl}_3$ ).



## 6. References

- [1] (a) Yu, W. Y.; Bensimon, C.; Alper, H. *Chem. Eur. J.* **1997**, *3*, 417. (b) Tomioka, T.; Sankranti, R.; Yamada, T.; Clark, C. *Org. Lett.*, **2013**, *15*, 5099-5101. (c) Wang, B.; Wong, O. A.; Zhao, M.-X.; Shi, Y.; *J. Org. Chem.*, **2008**, *73*, 9539-9543. (d) Qin, Y.; You, S. L. *Org. Lett.* **2014**, *16*, 1810. (e) Dabdoub, M. J.; Jacob, R. G.; Ferreira, J. T. B.; Dabdoub, V. B.; Marques, F. A. *Tetrahedron. Lett.* **1999**, *40*, 7159.
- [2] Hamilton, G. L.; Kang, E. J.; Mba, M.; Toste, F. D. *Science*. **2007**, *317*, 496.
- [3] (a) Suzuki, T.; Ota, Y.; Kasuya, Y.; Mutsuga, M.; Kawamura, Y.; Tsumoto, H.; Nakagawa, H.; Finn, M. G.; Miyata, N. *Angew. Chem., Int. Ed.* **2010**, *49*, 6817. (b) Kita, Y.; Matsuda, S.; Inoguchi, R.; Ganesh, J. K.; Fujioka, H. *J. Org. Chem.* **2006**, *71*, 5191 (c) Abad, A.; Agulló, C.; Cuñat, A. C.; Navarro, I.; *Synthesis*, **2005**, *19*, 3355. (d) Manas, M. M.; Teixido, M.; *J. Heterocycl. Chem.* **1988**, *25*, 1439.

## 7. Copies of spectrum

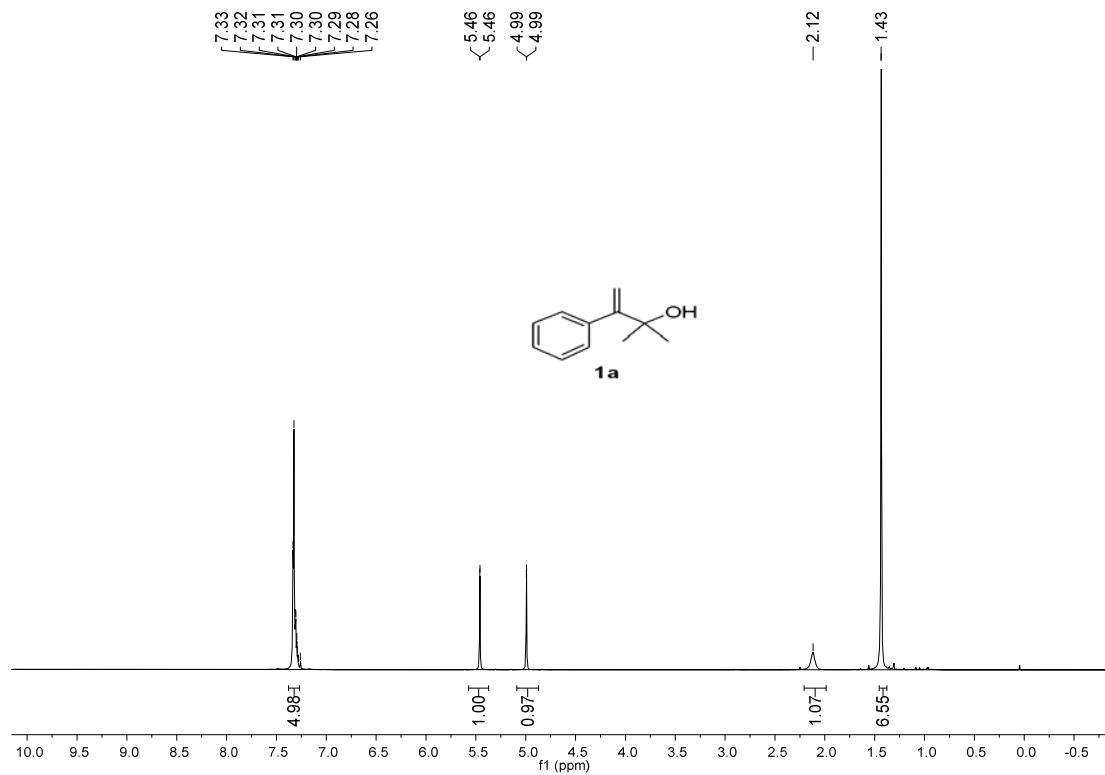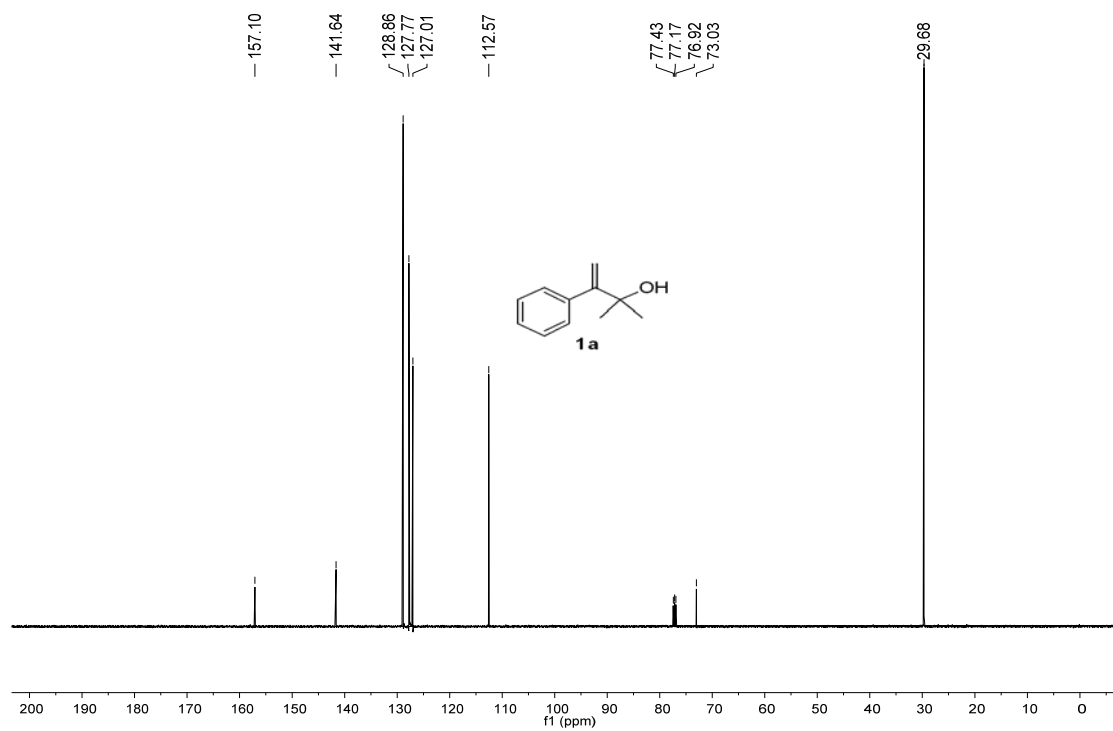

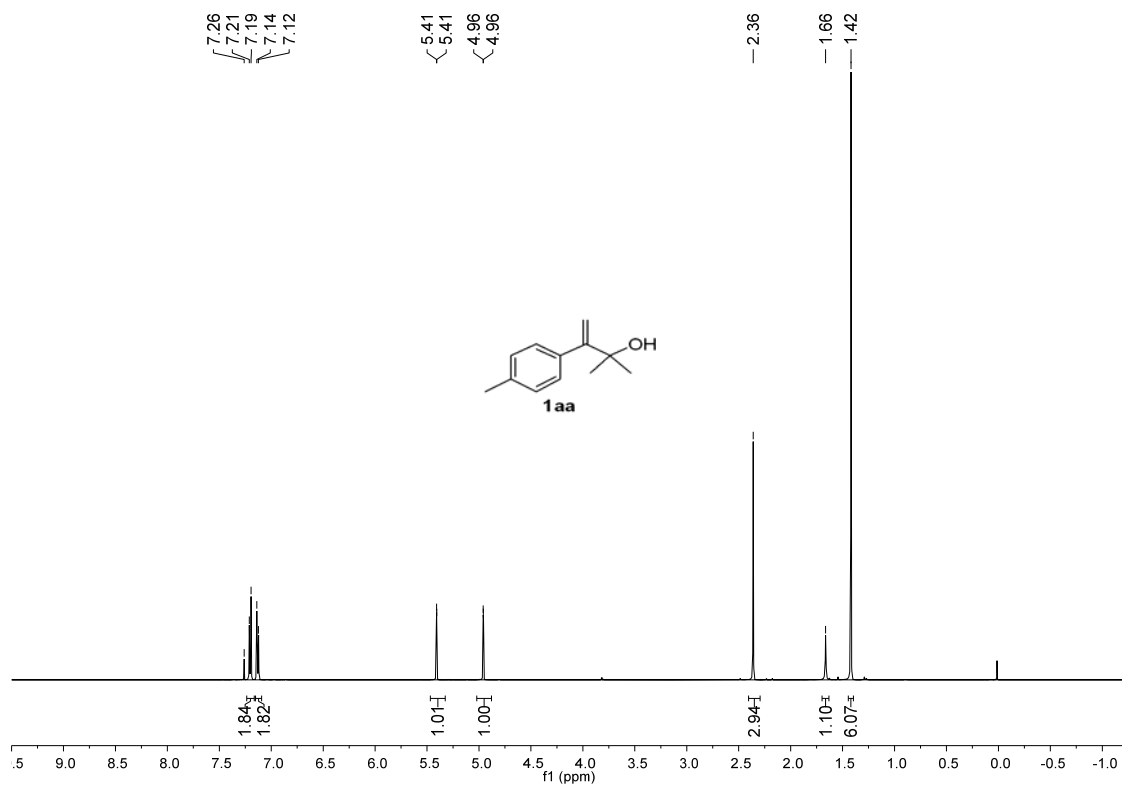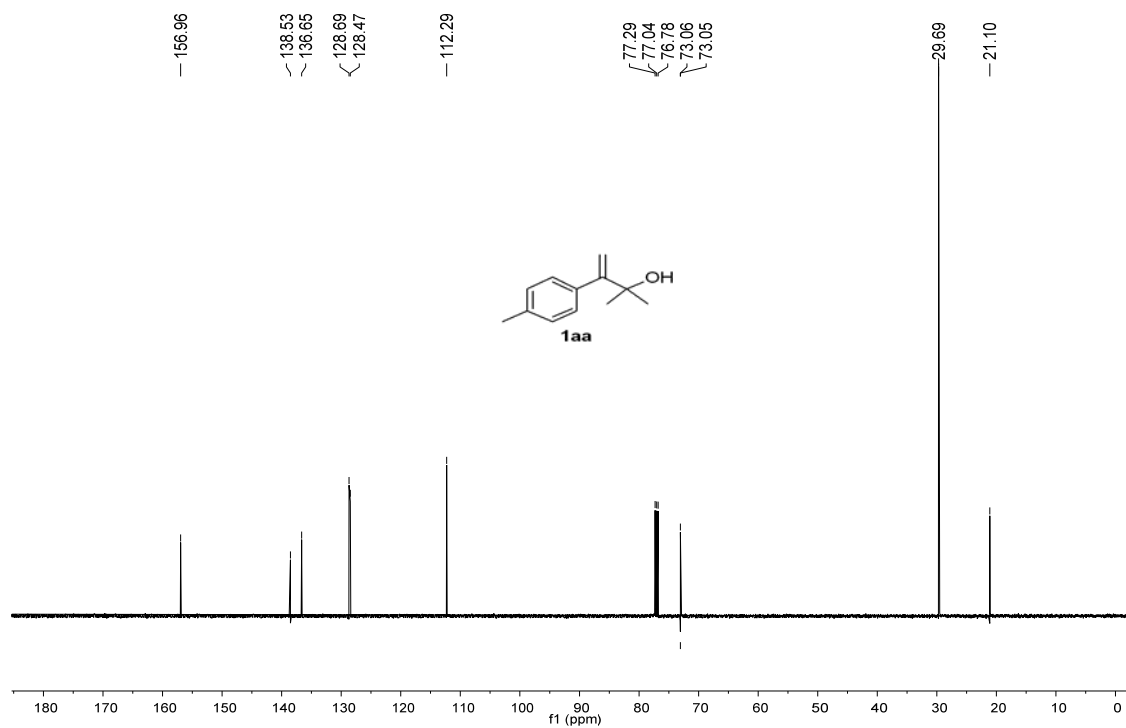

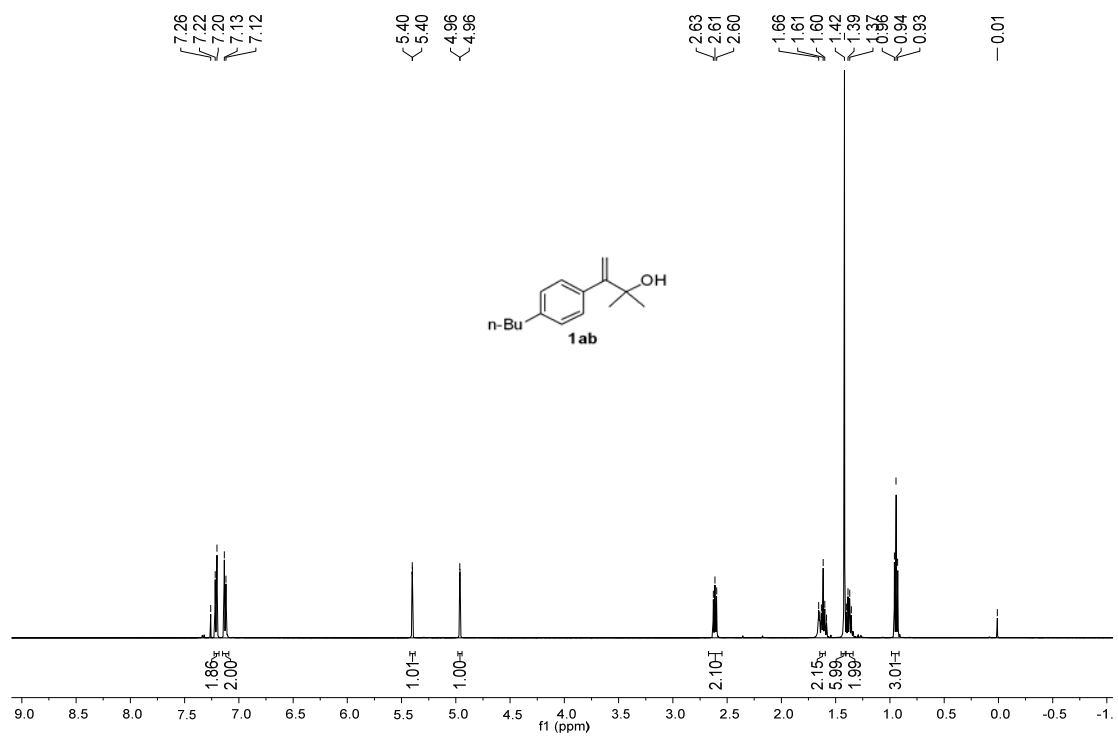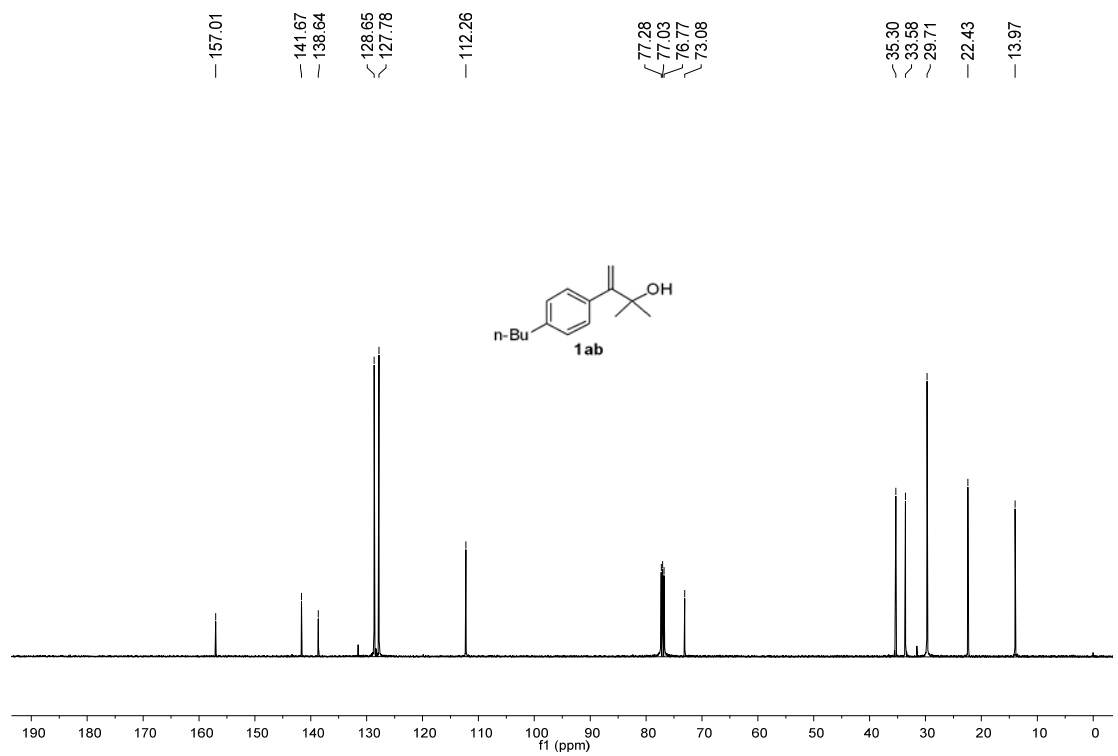

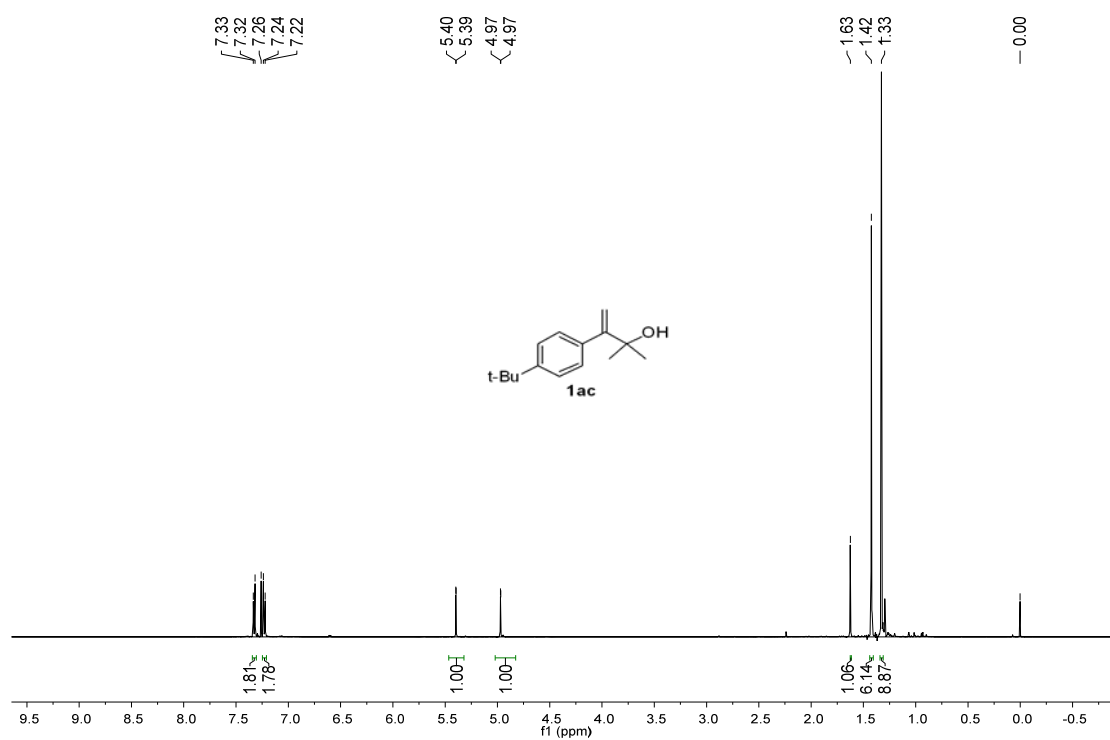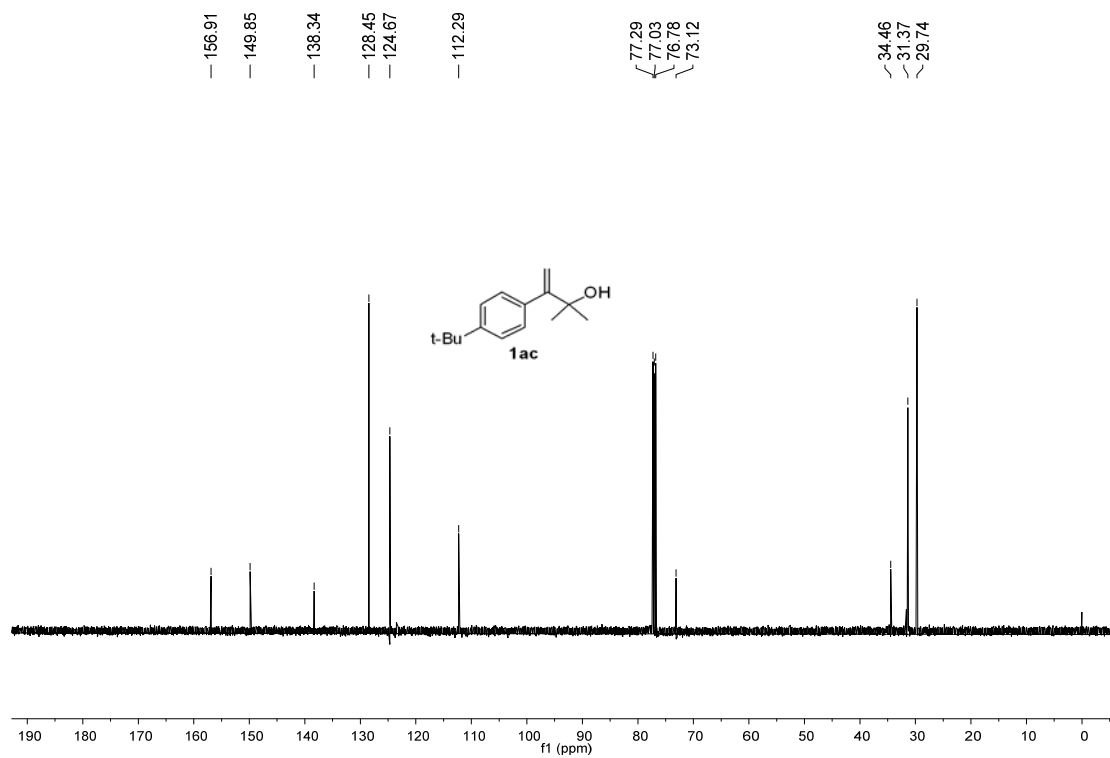

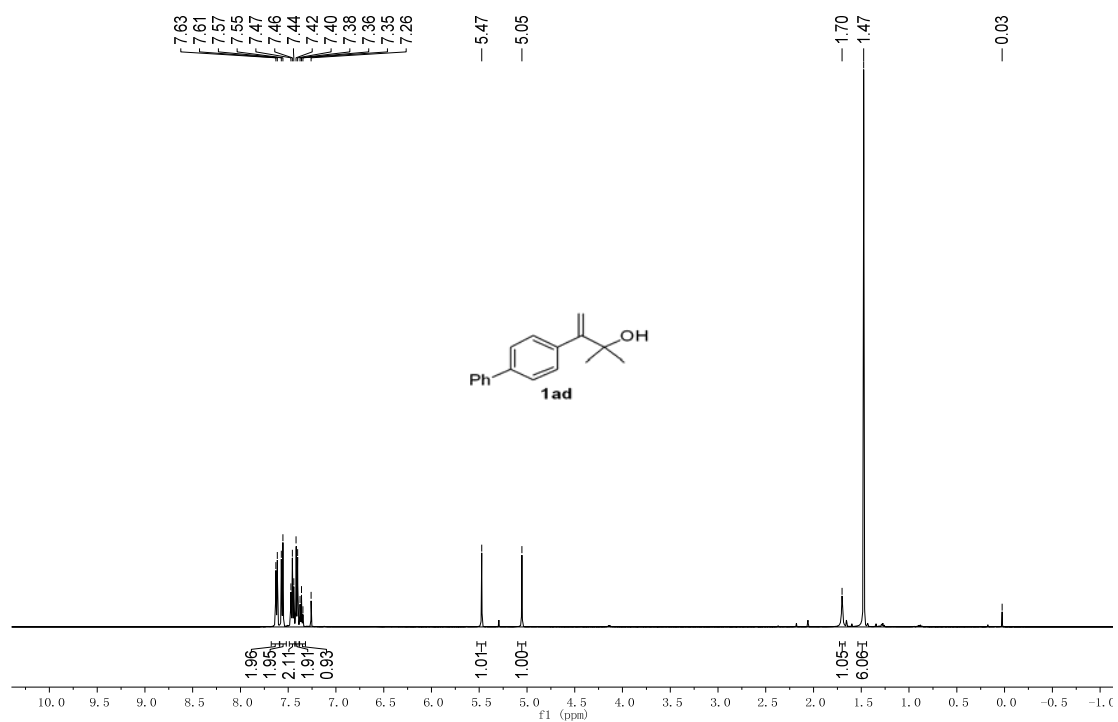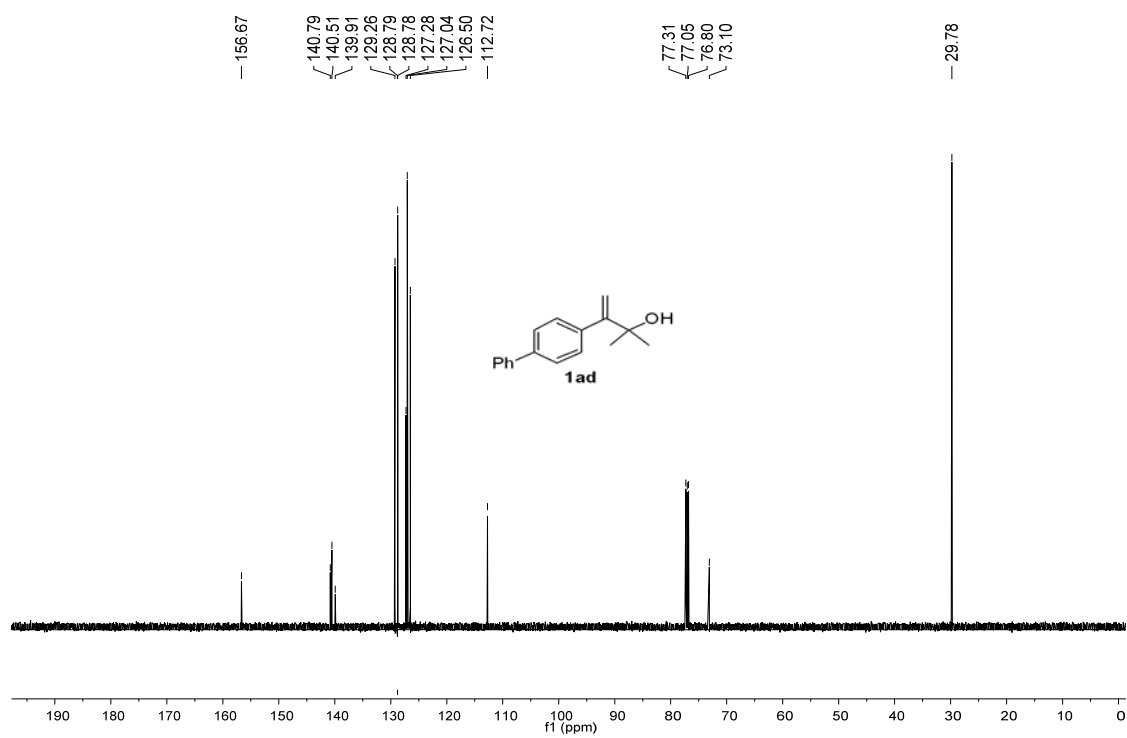

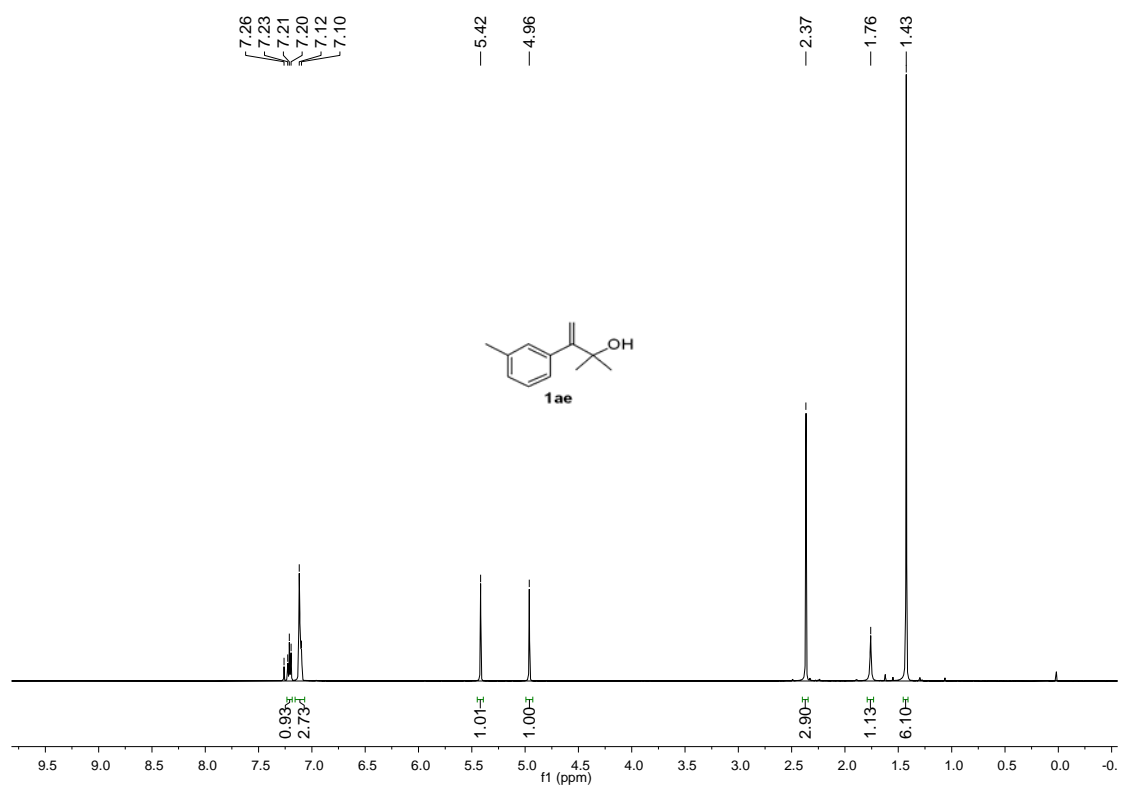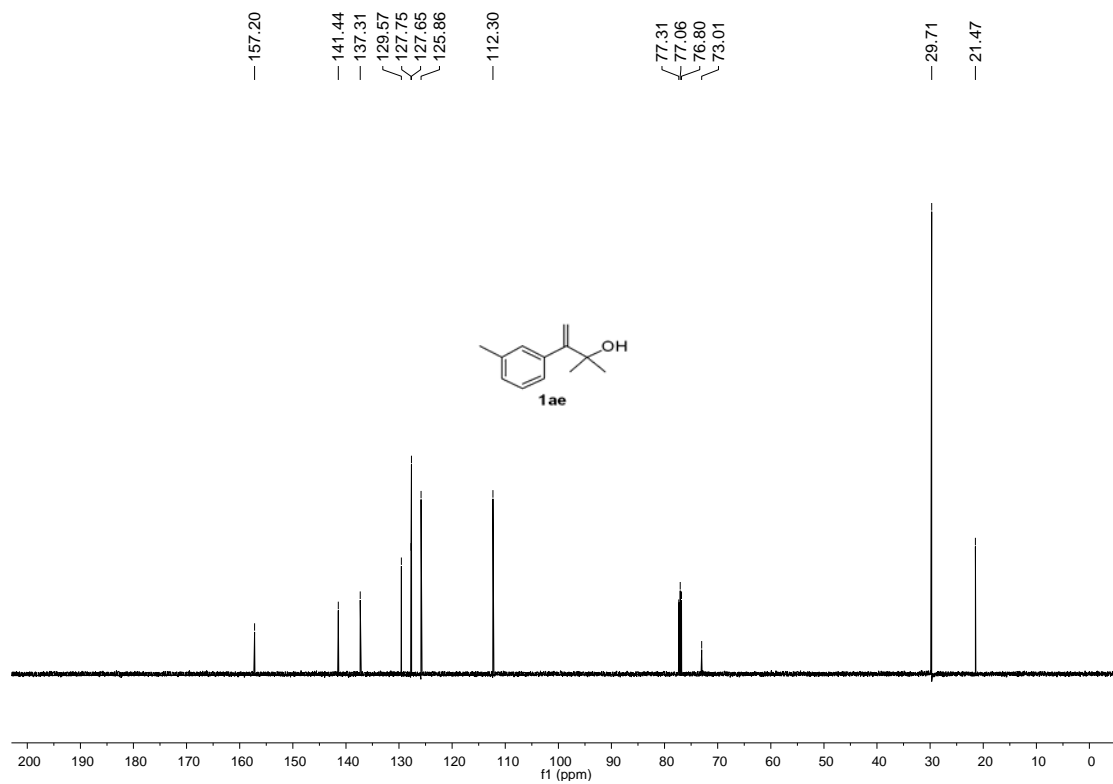

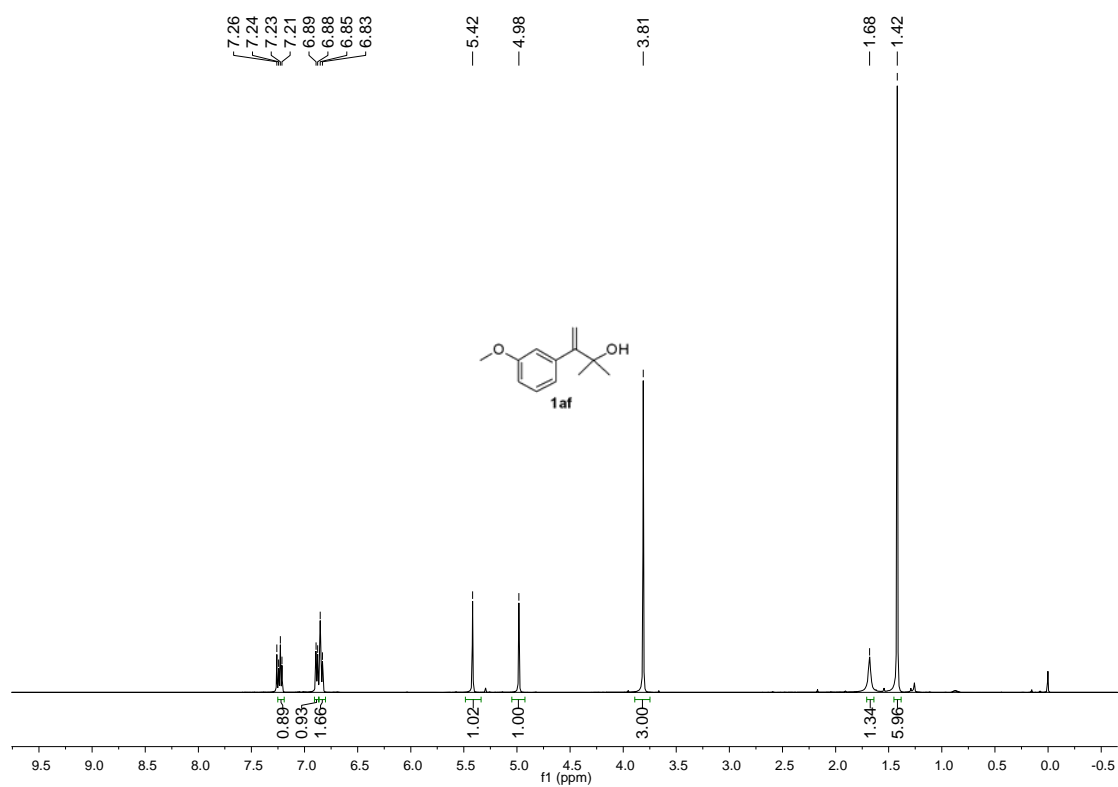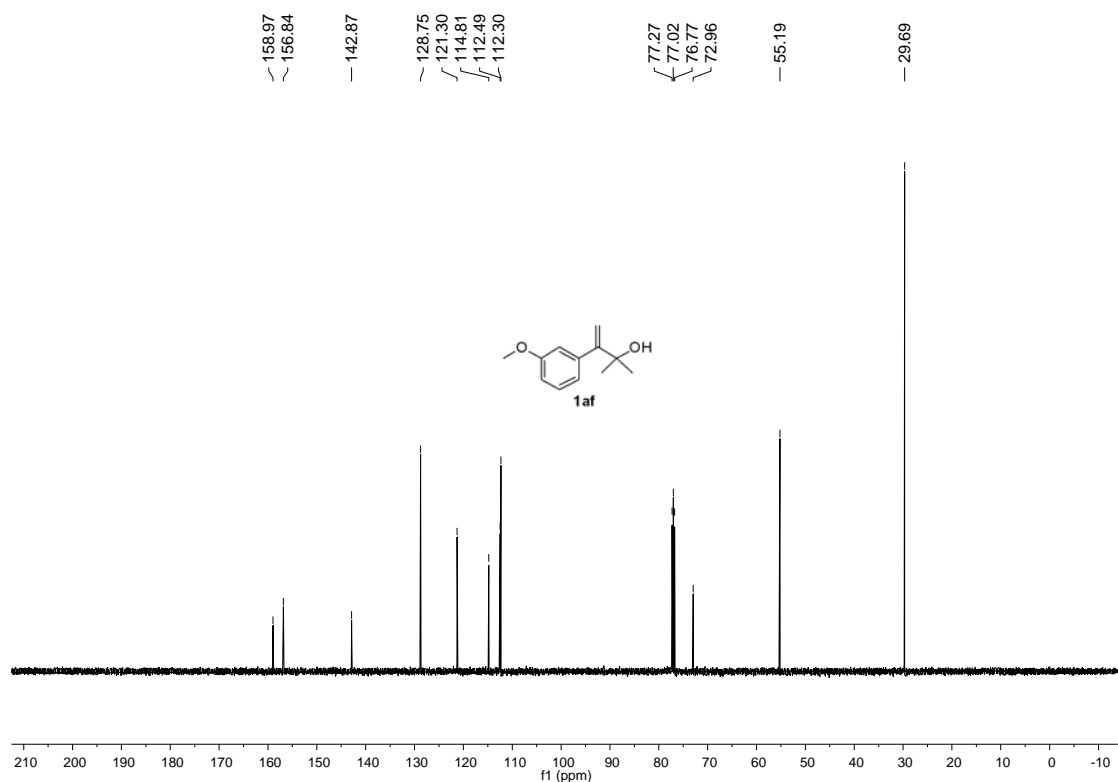



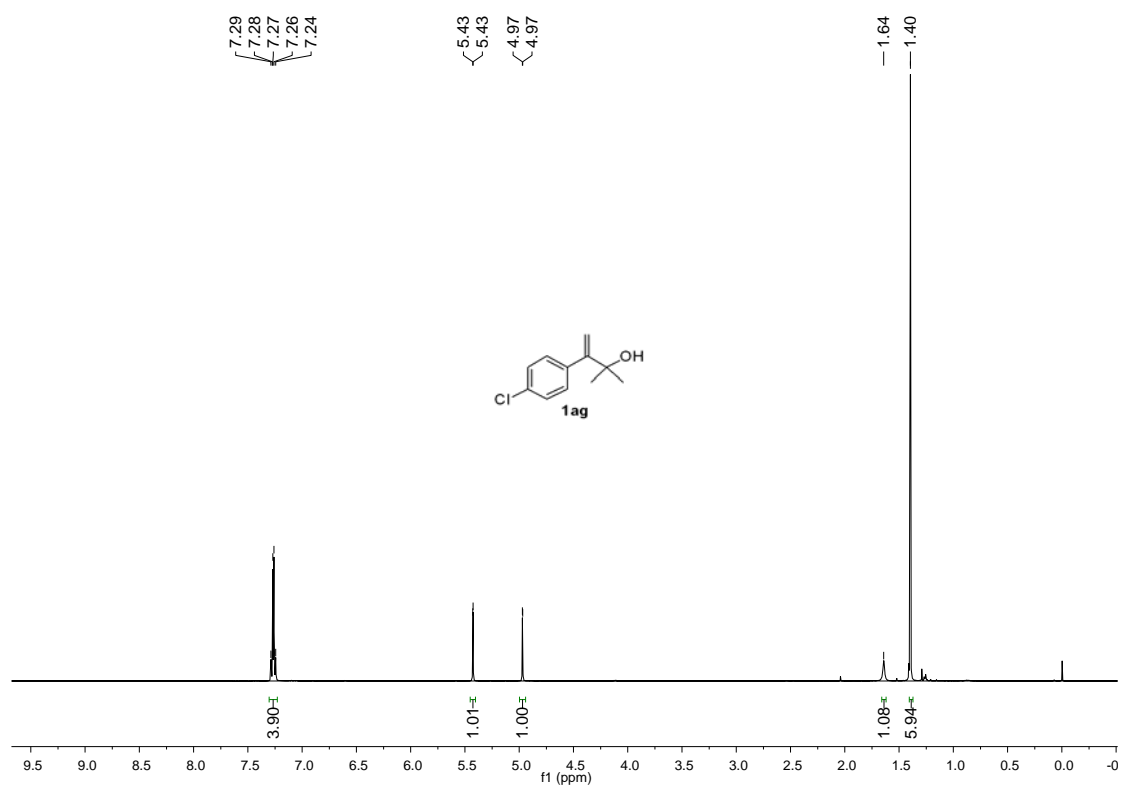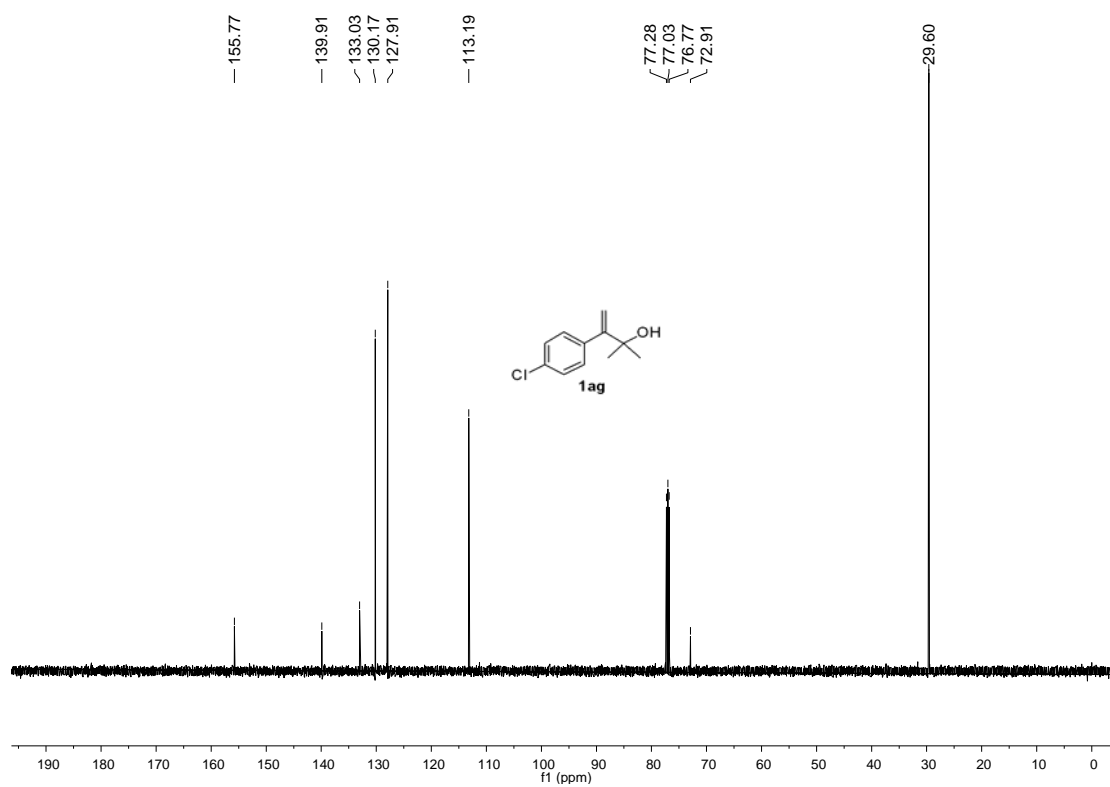

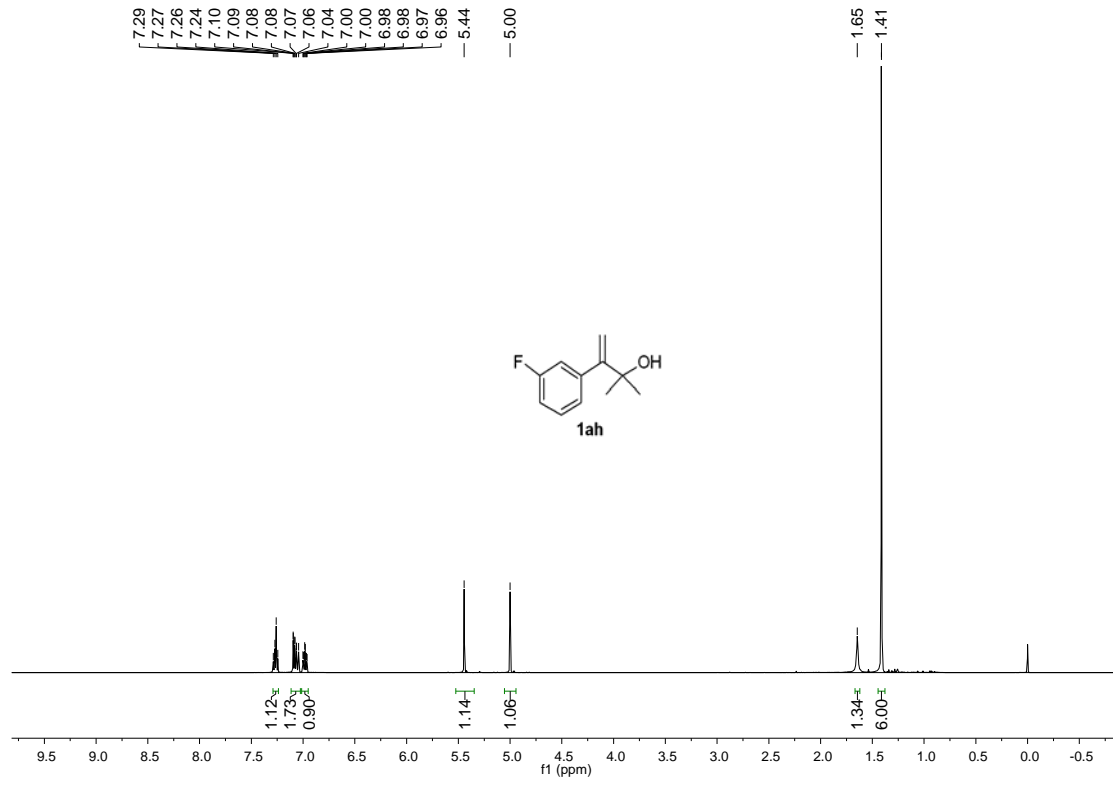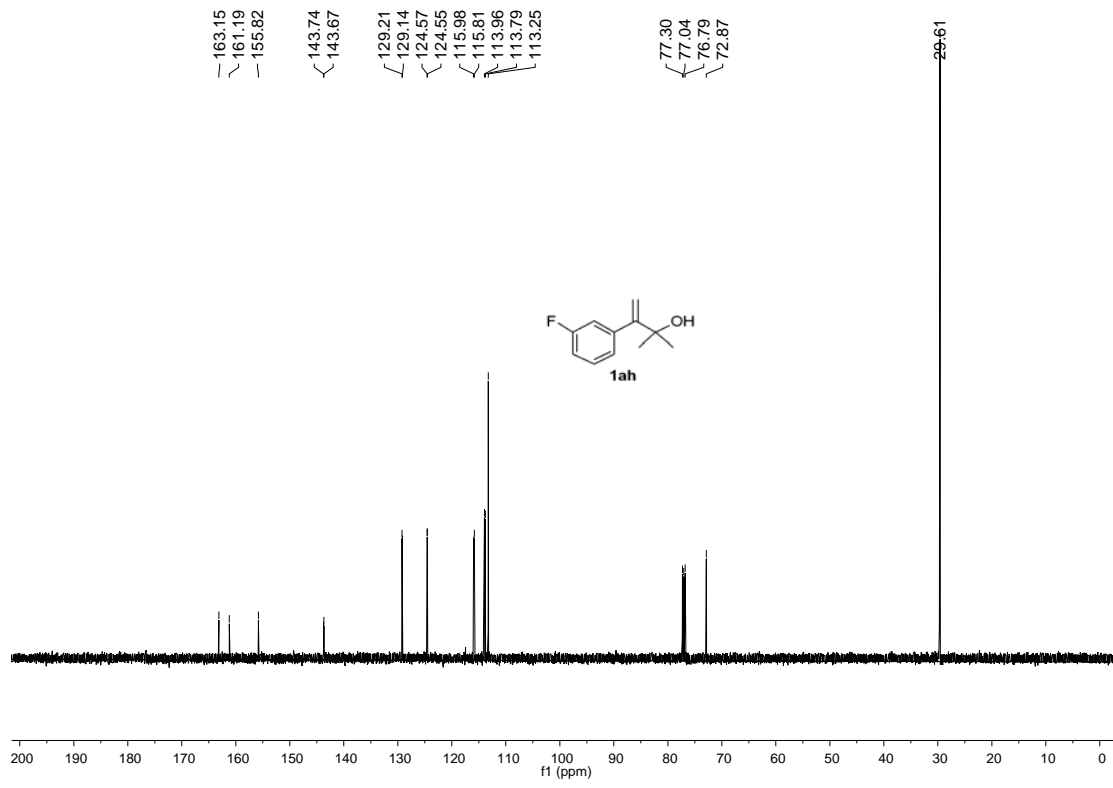

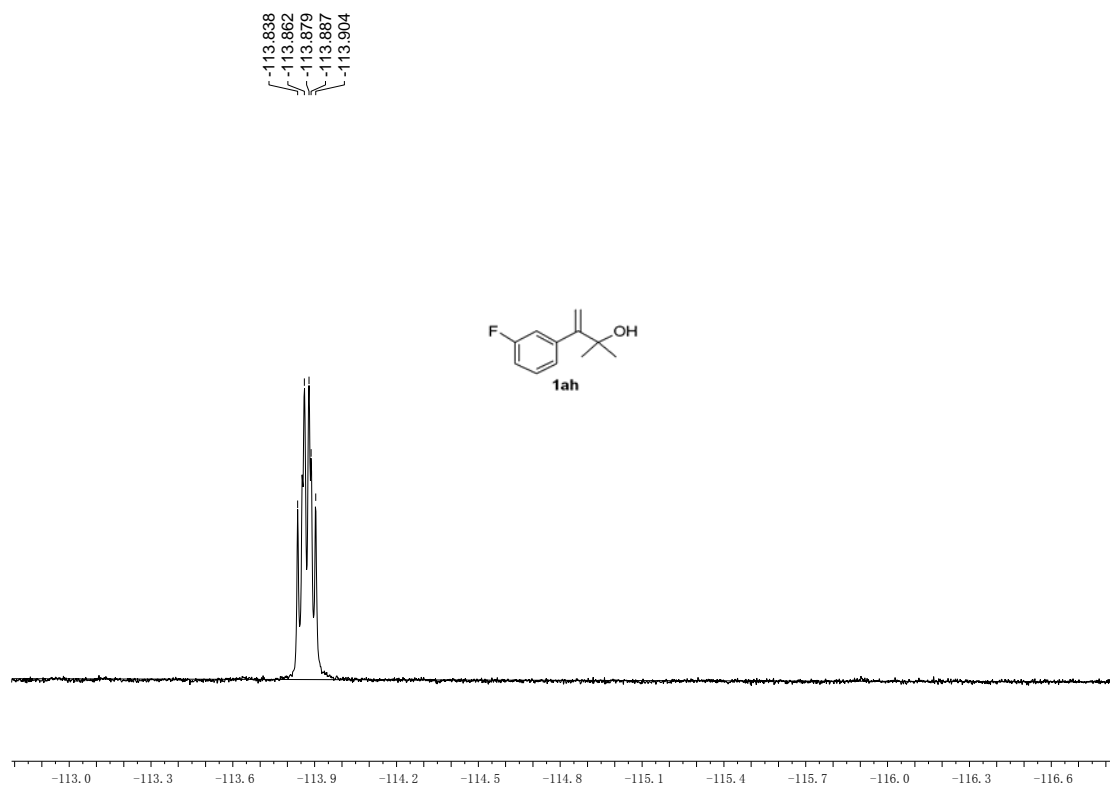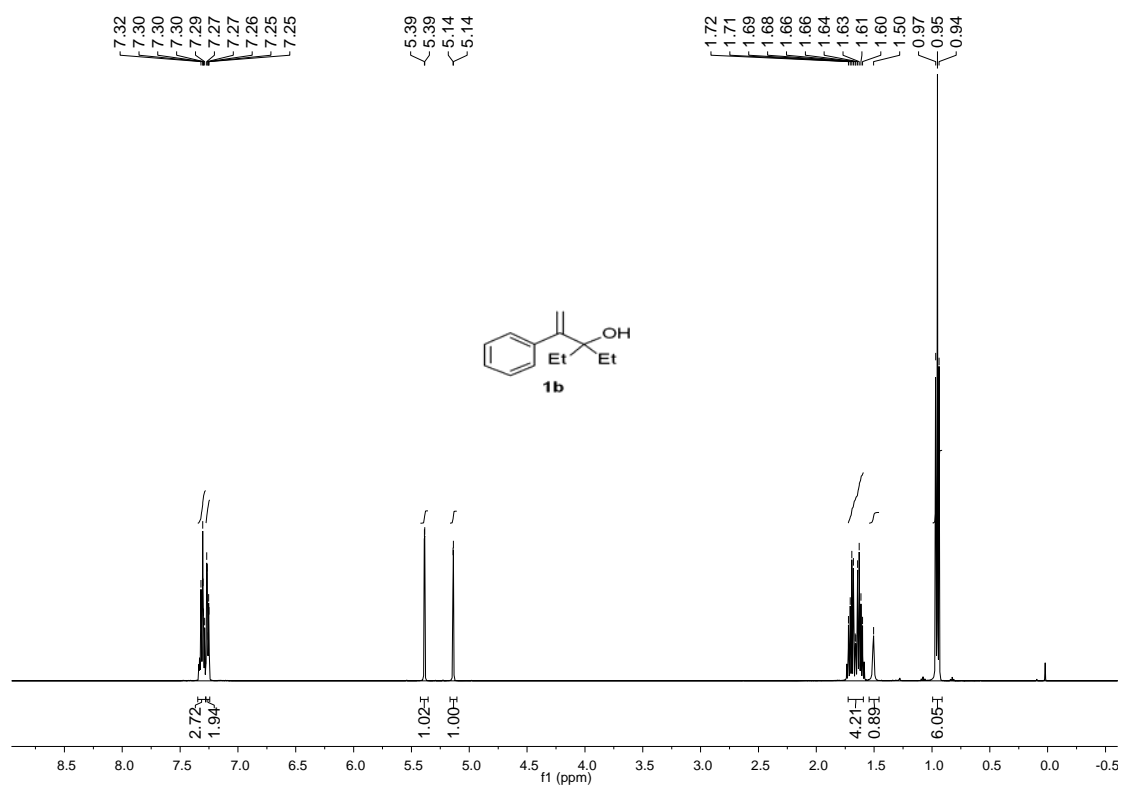

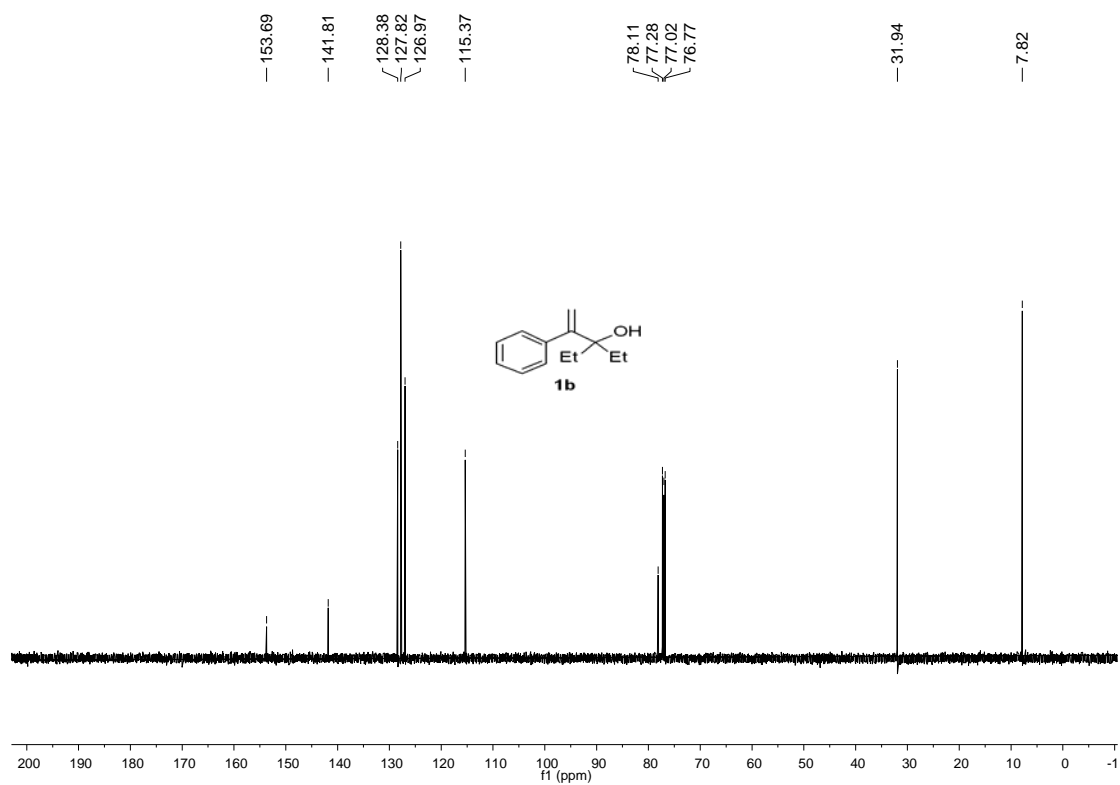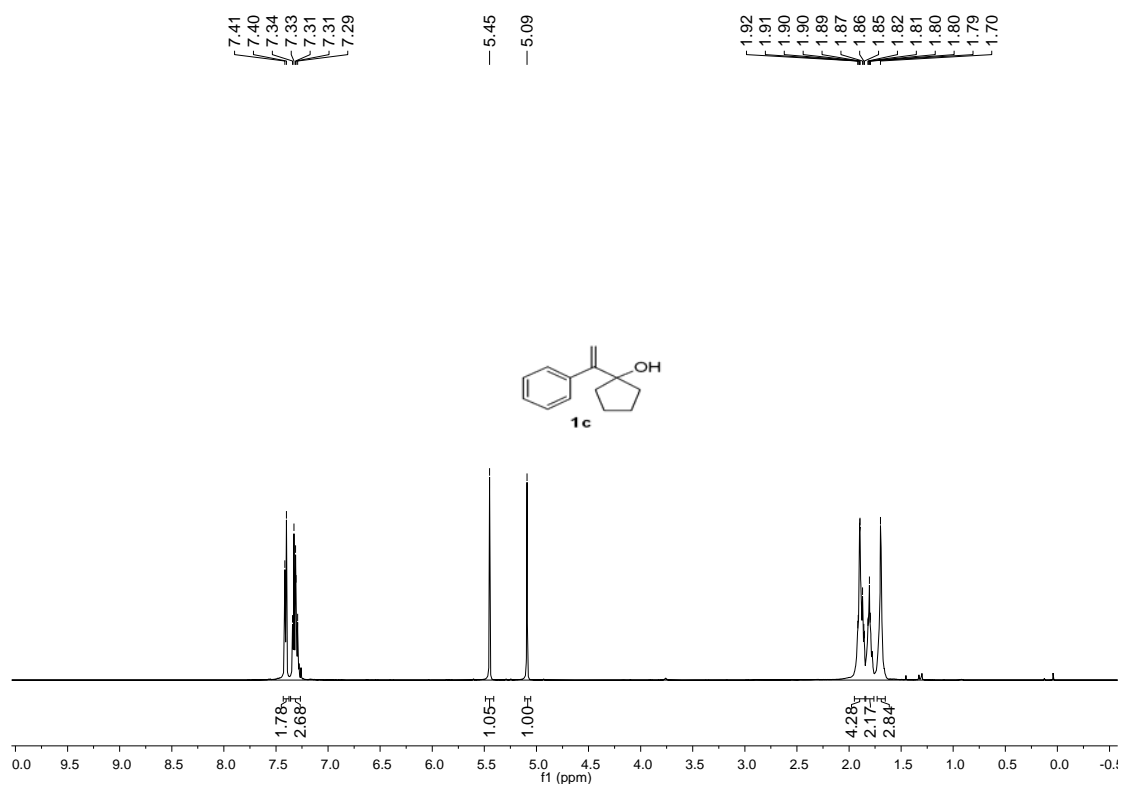

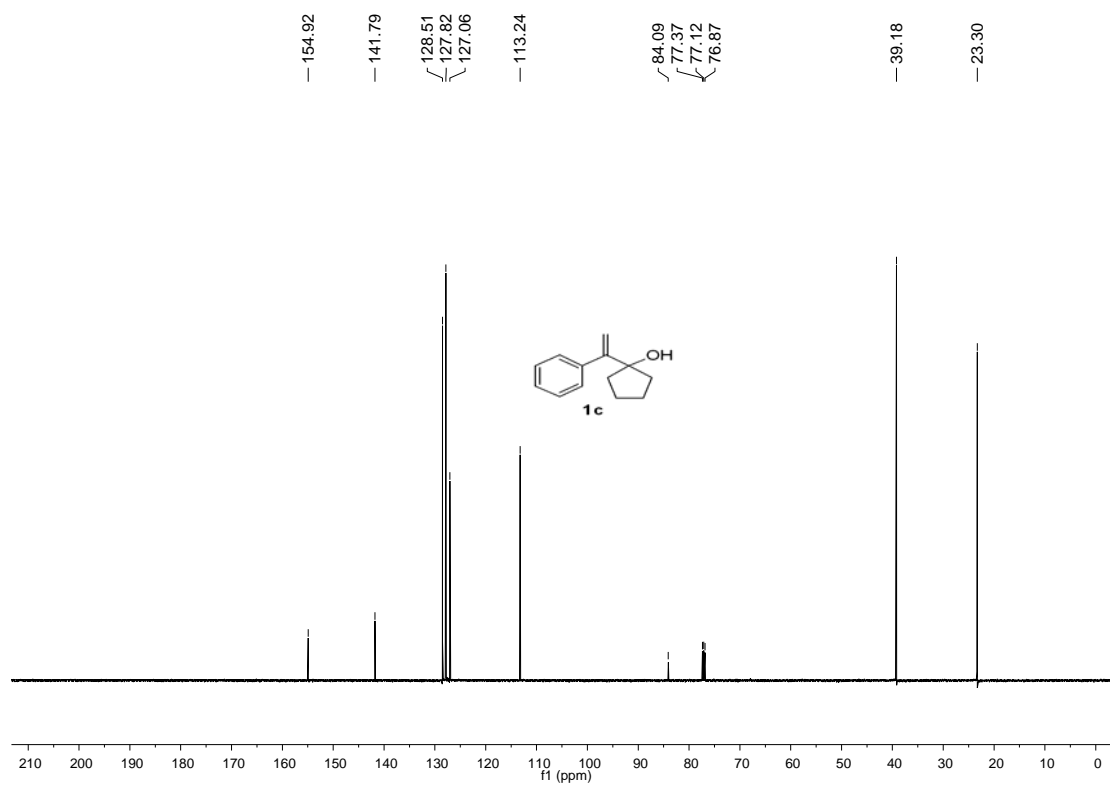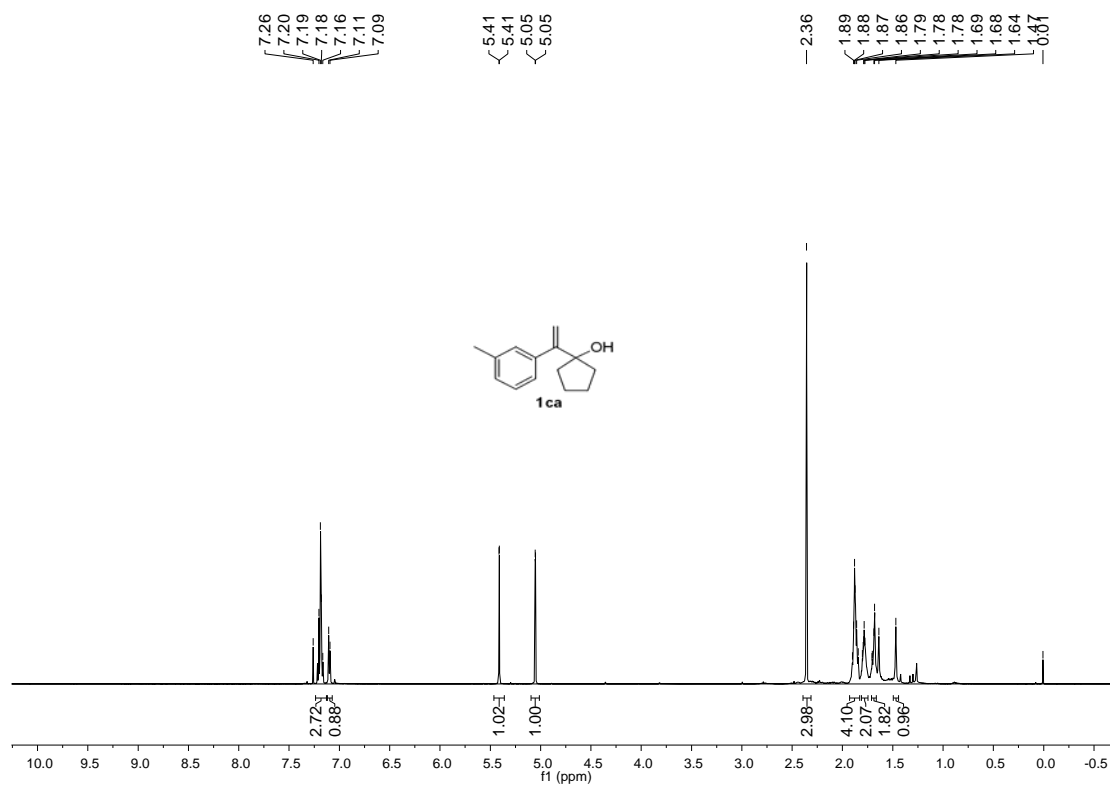

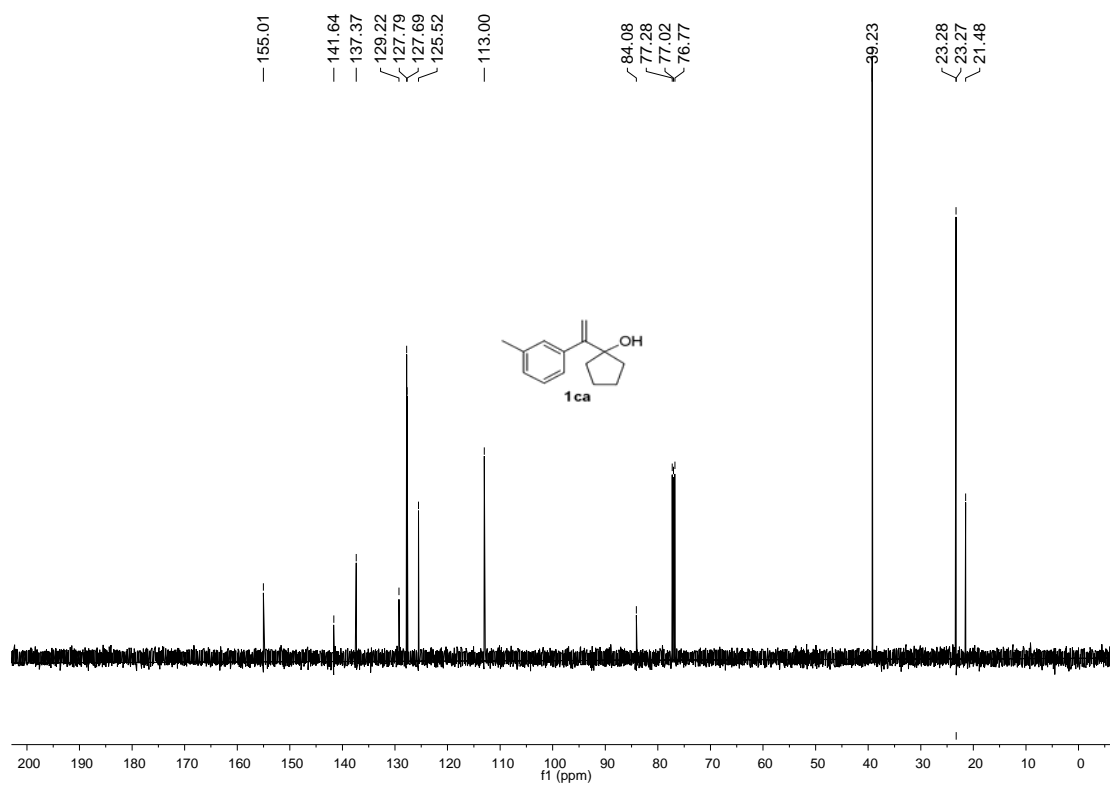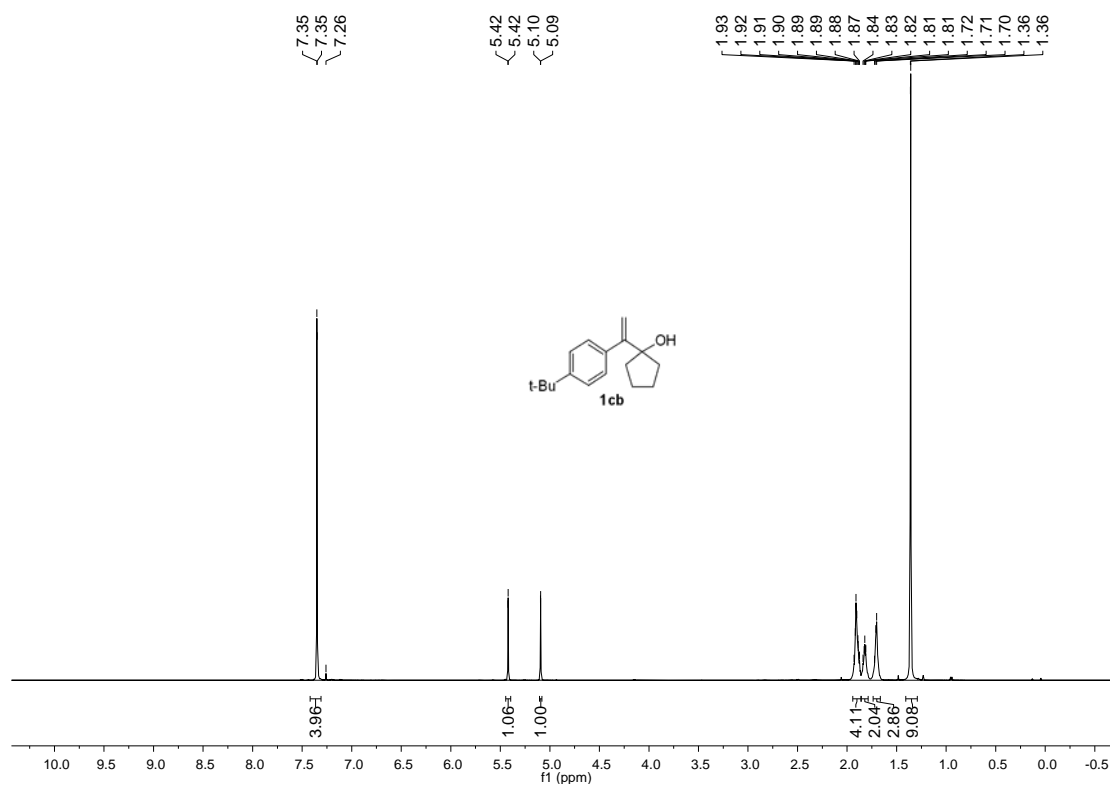

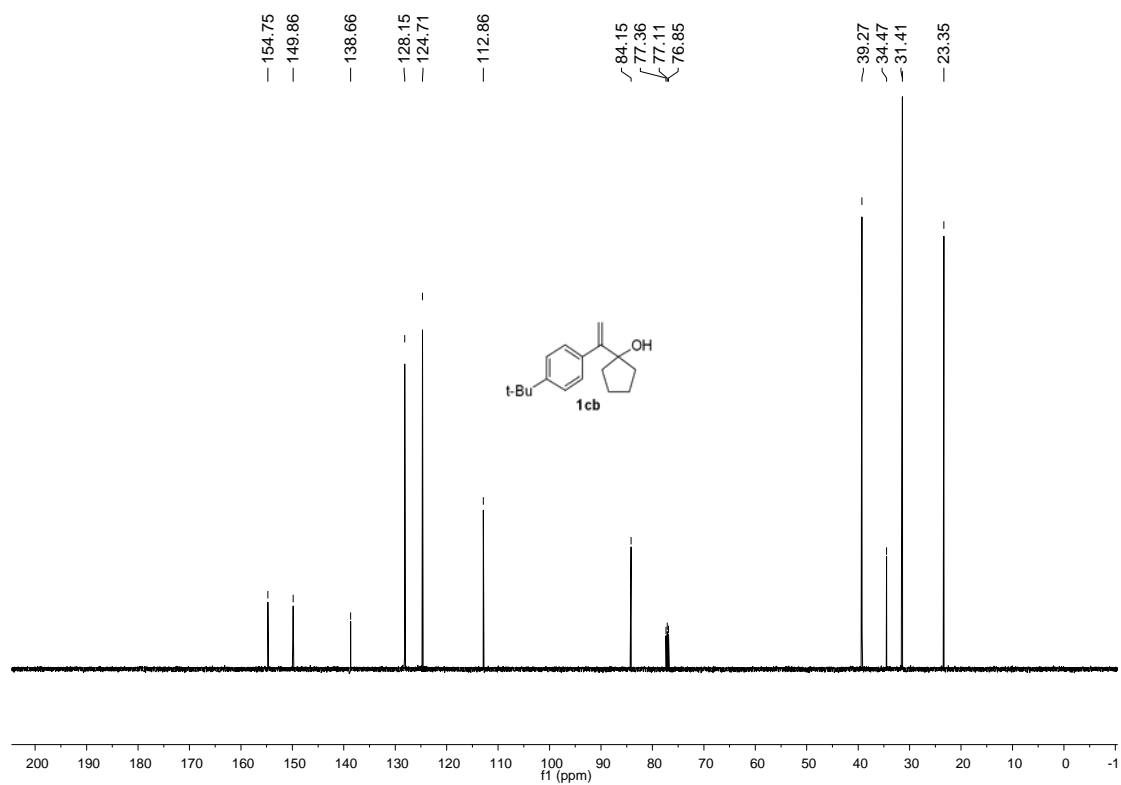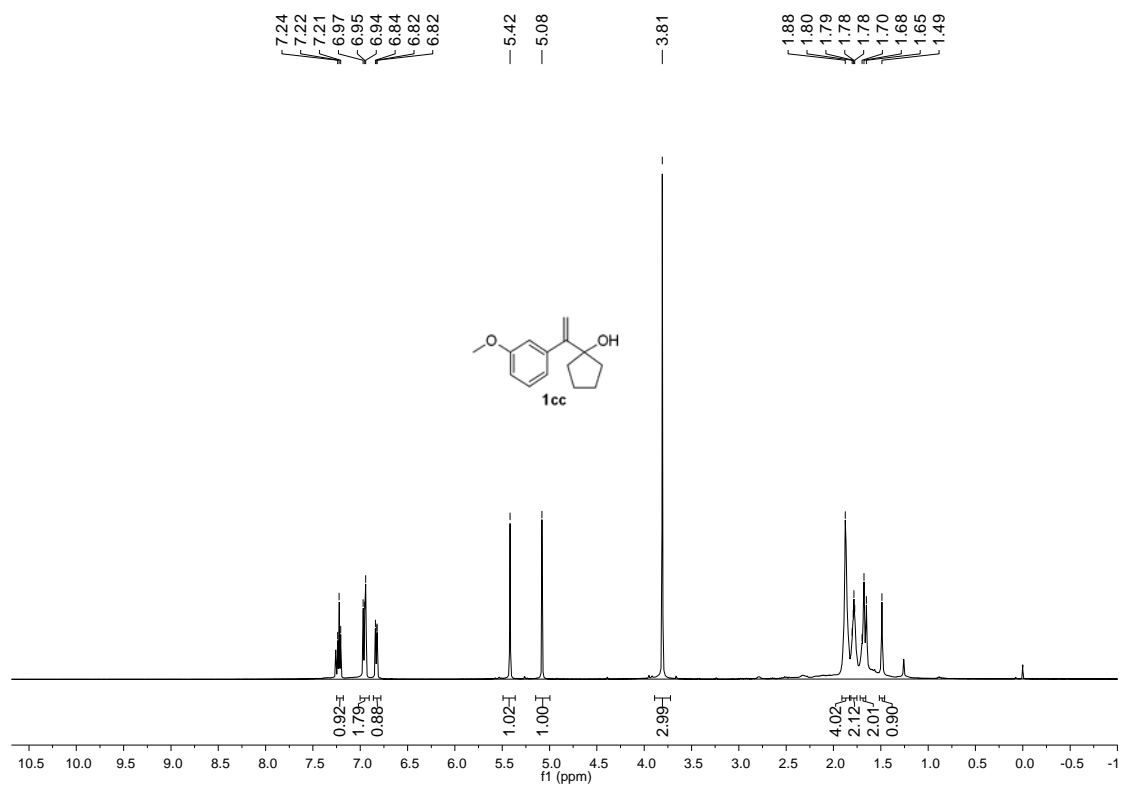

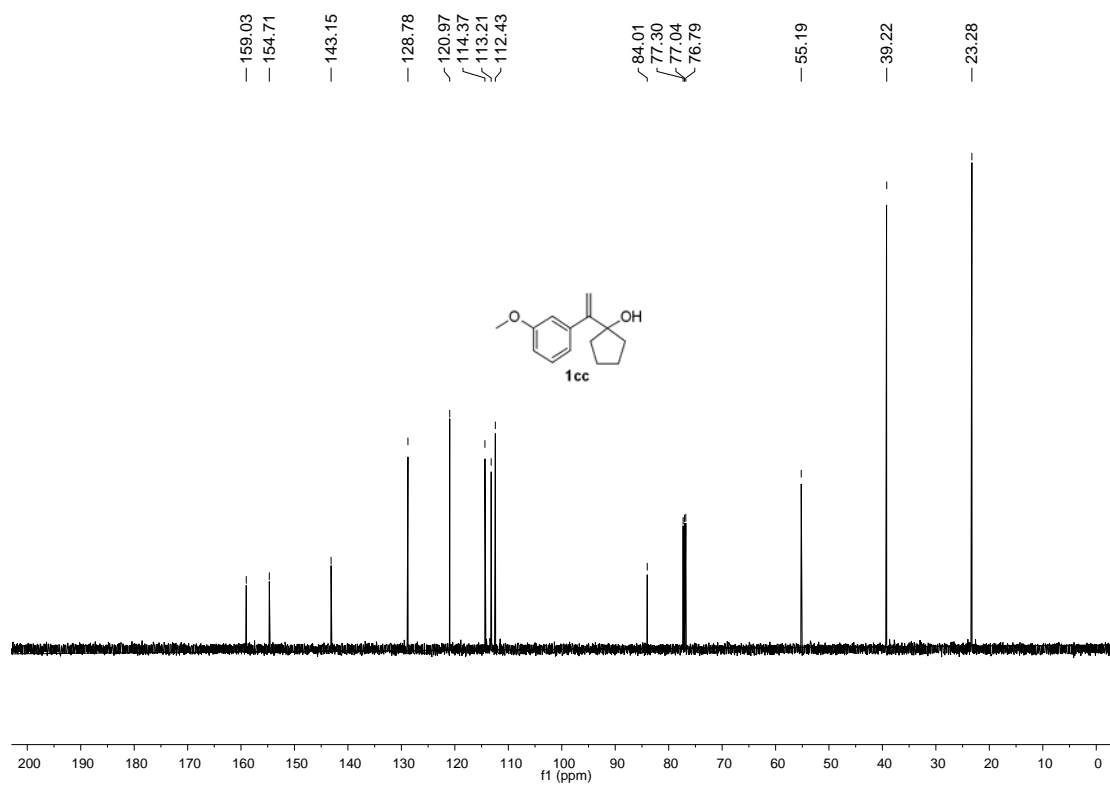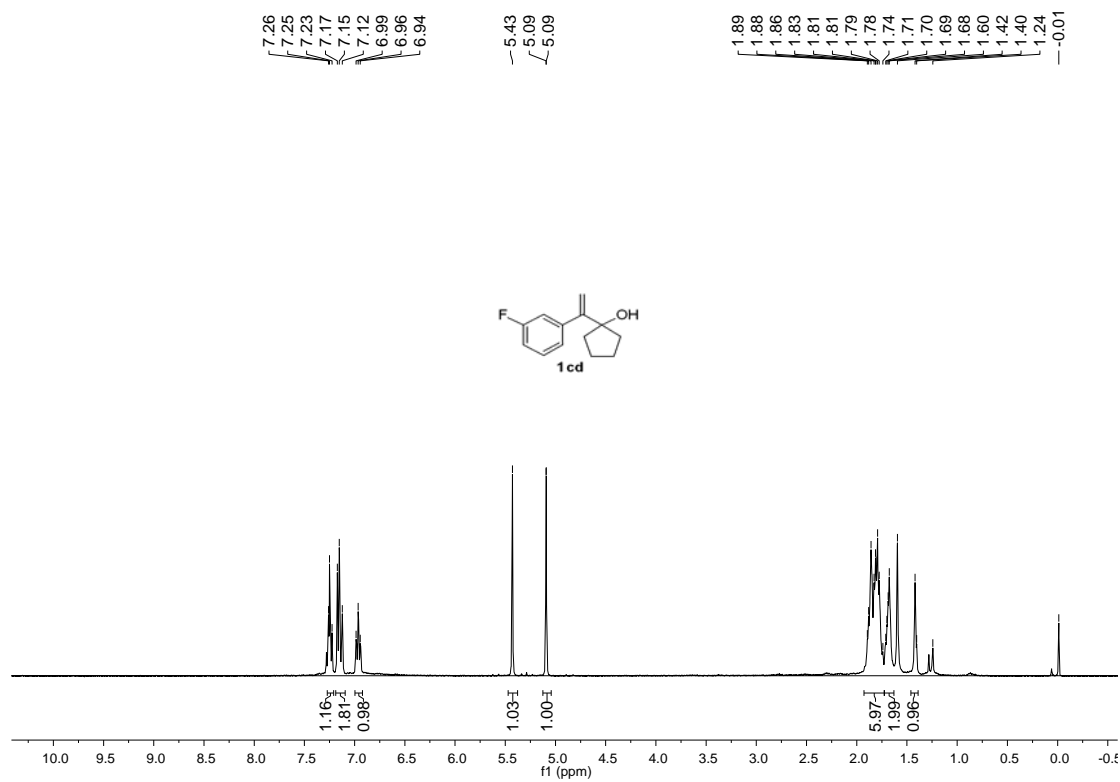



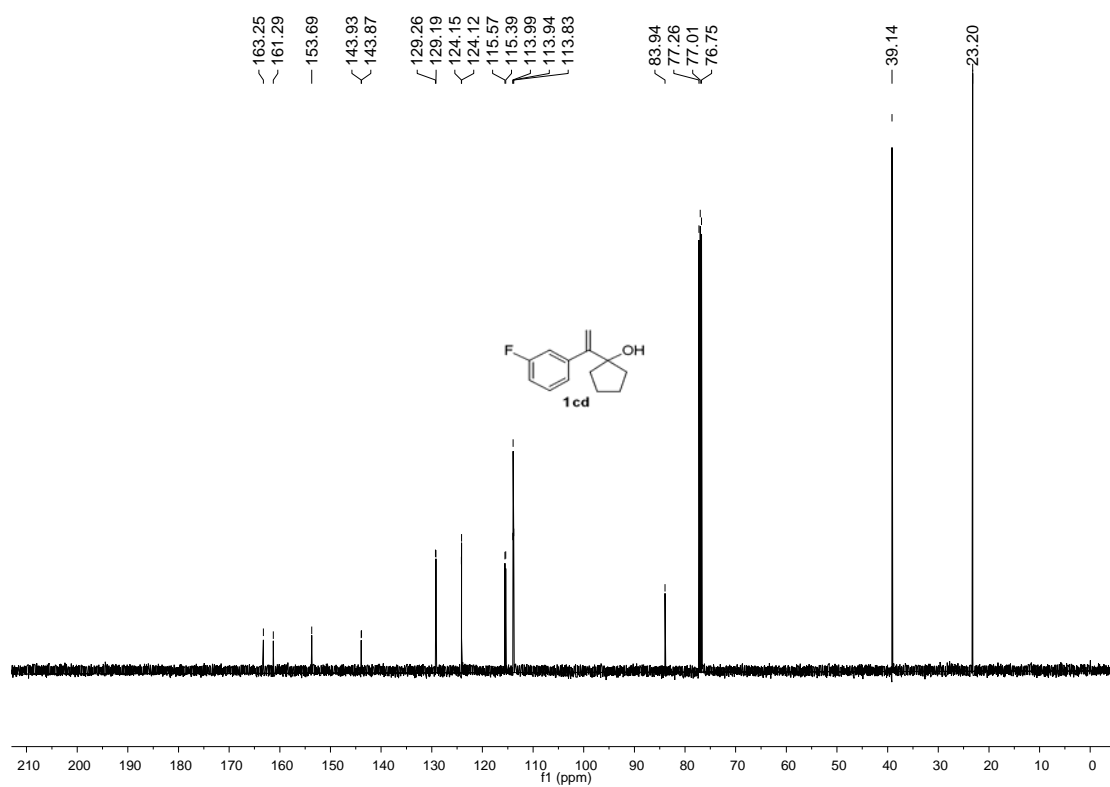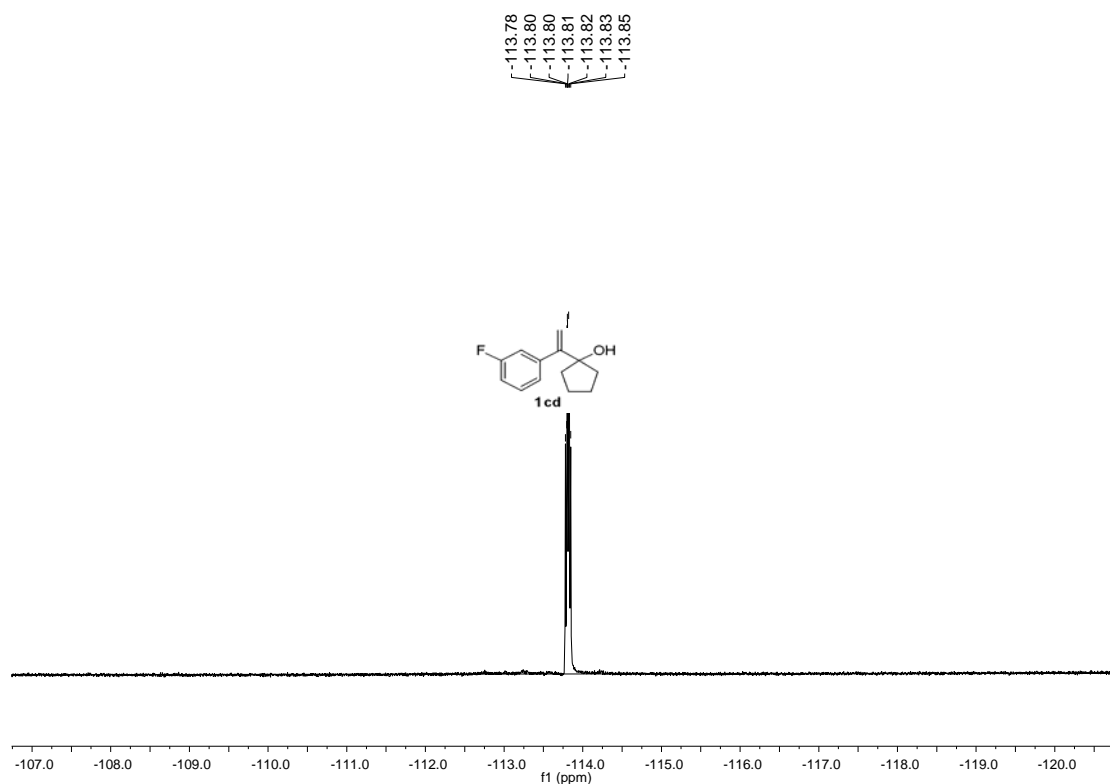

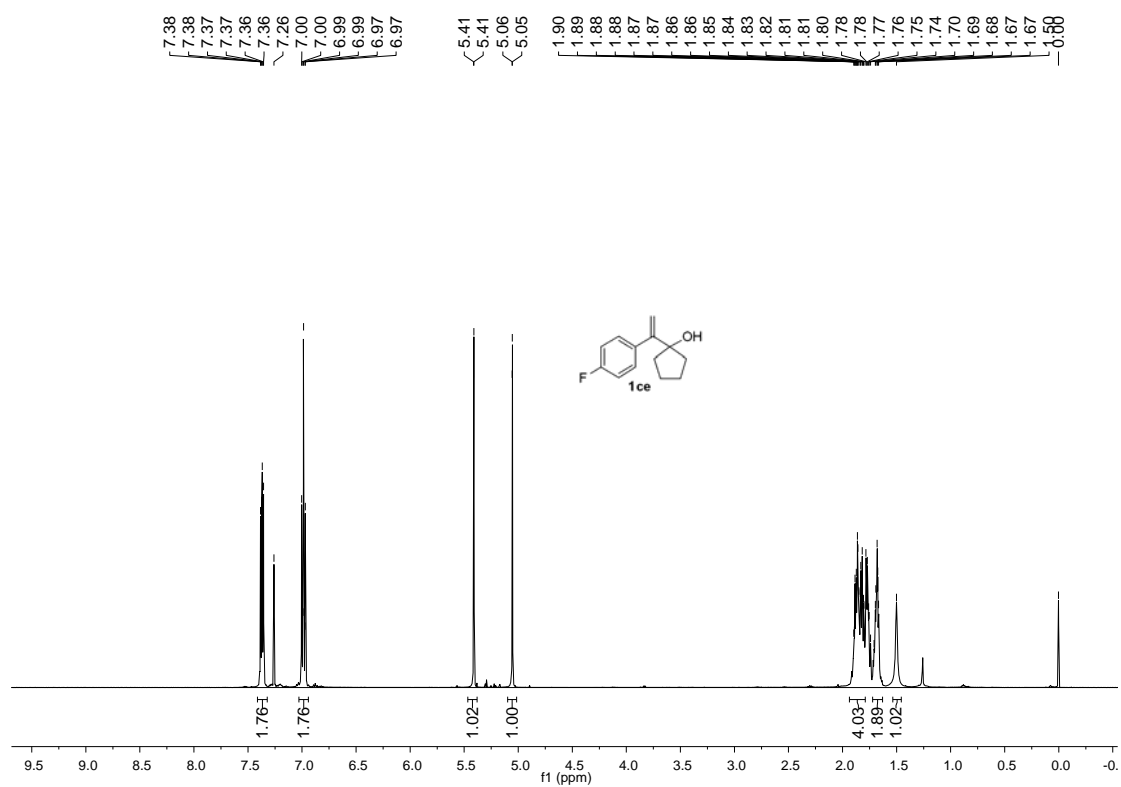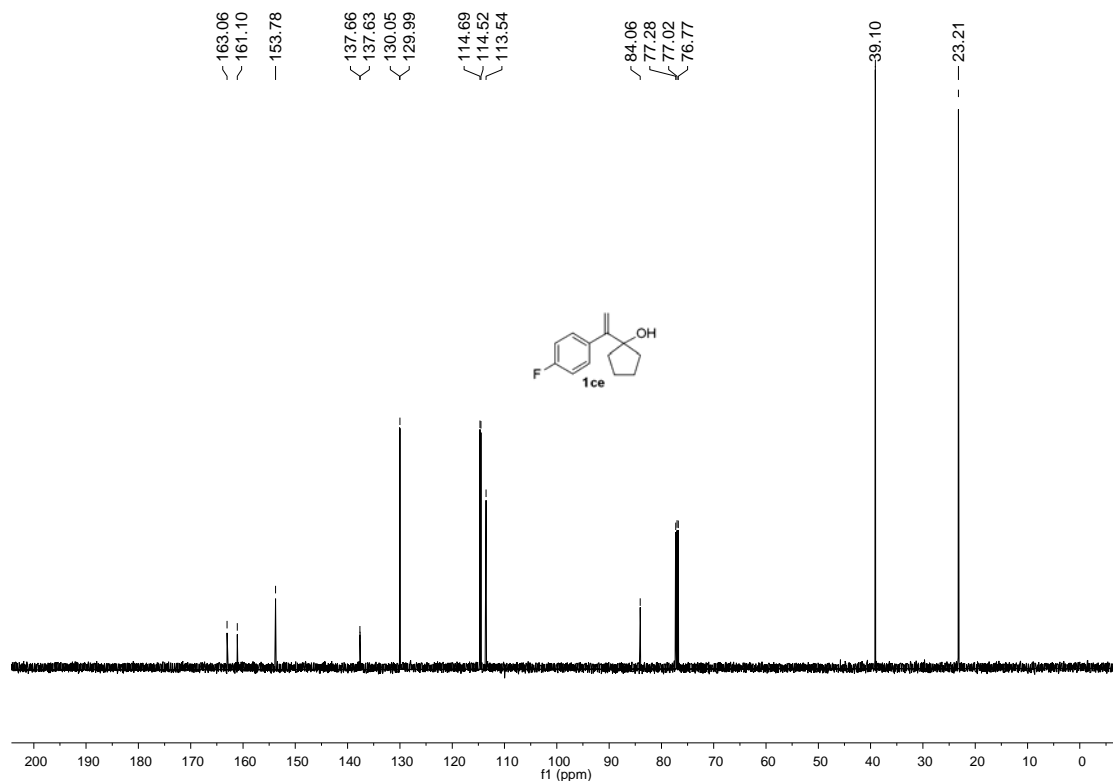

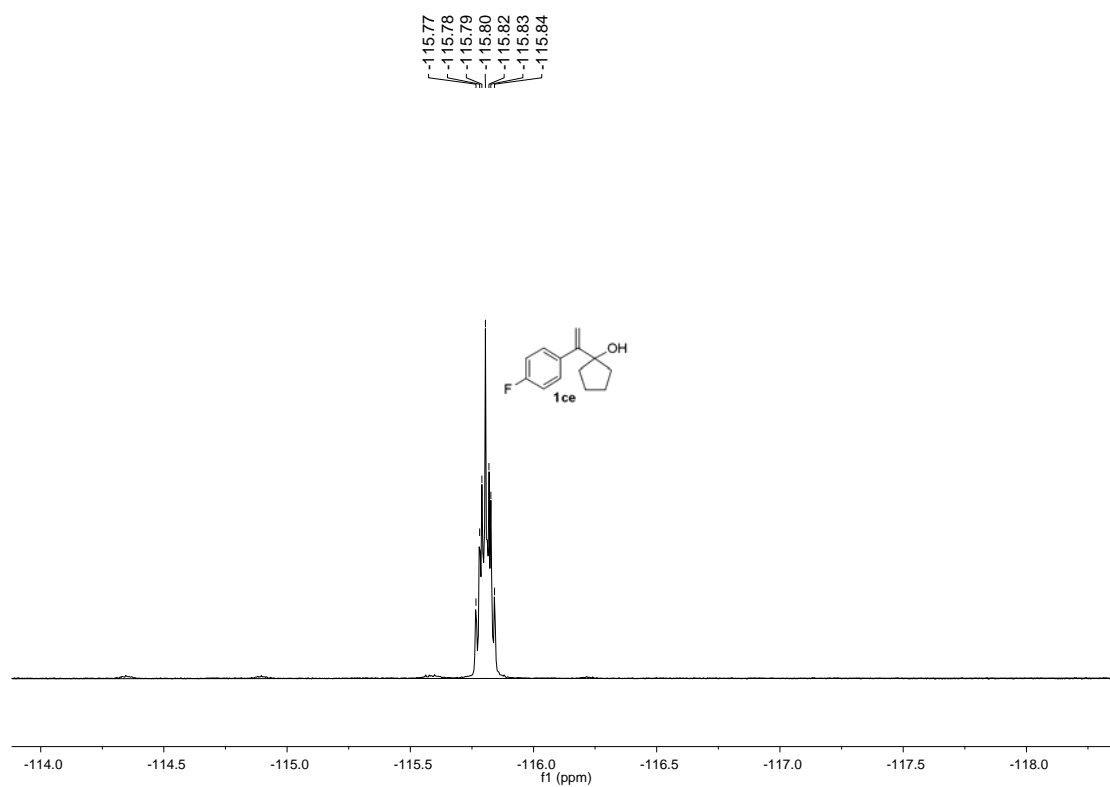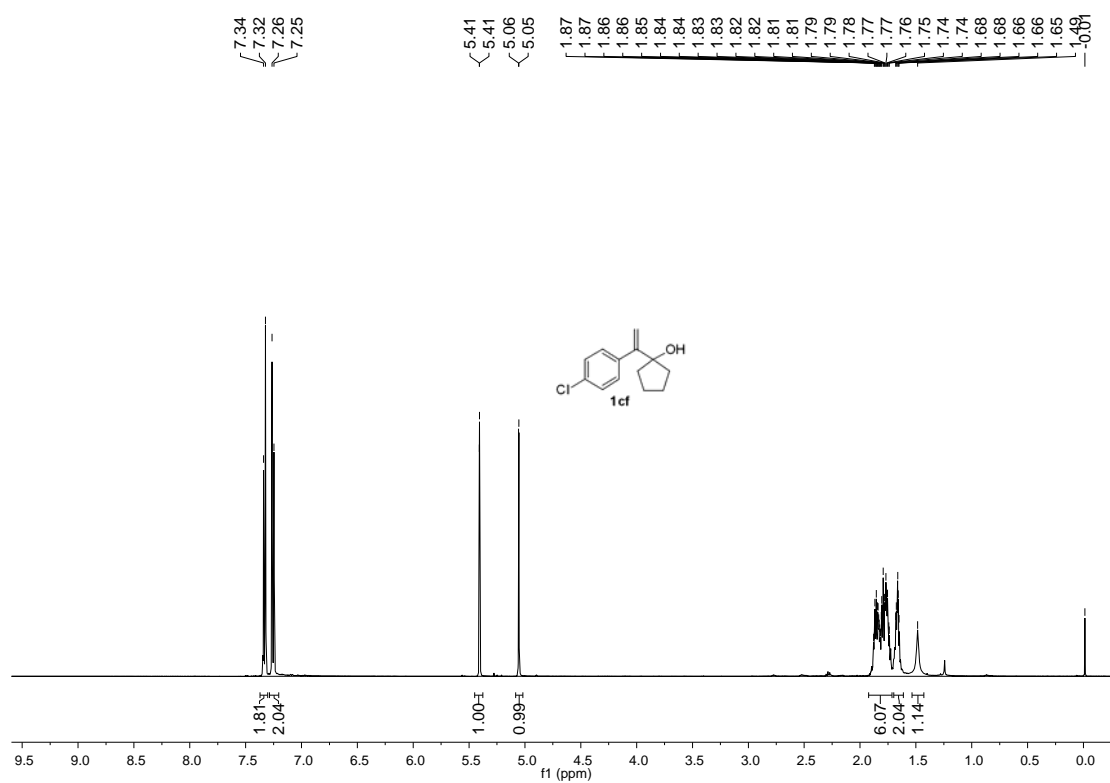

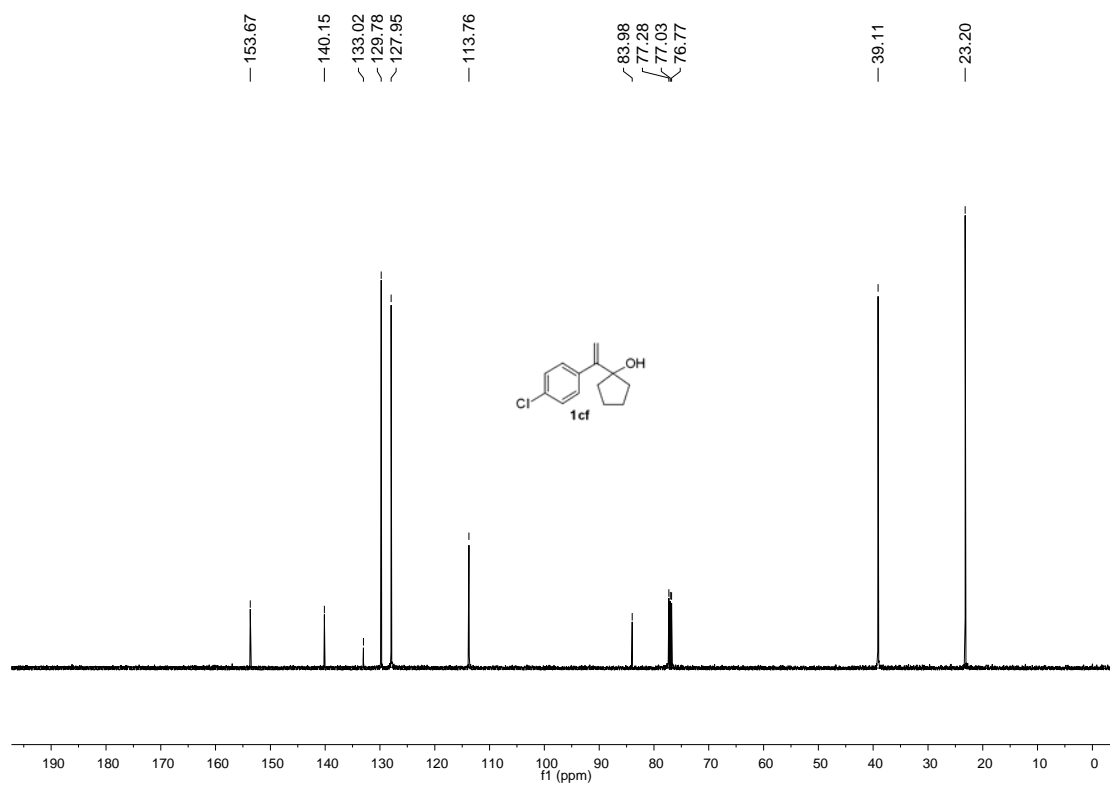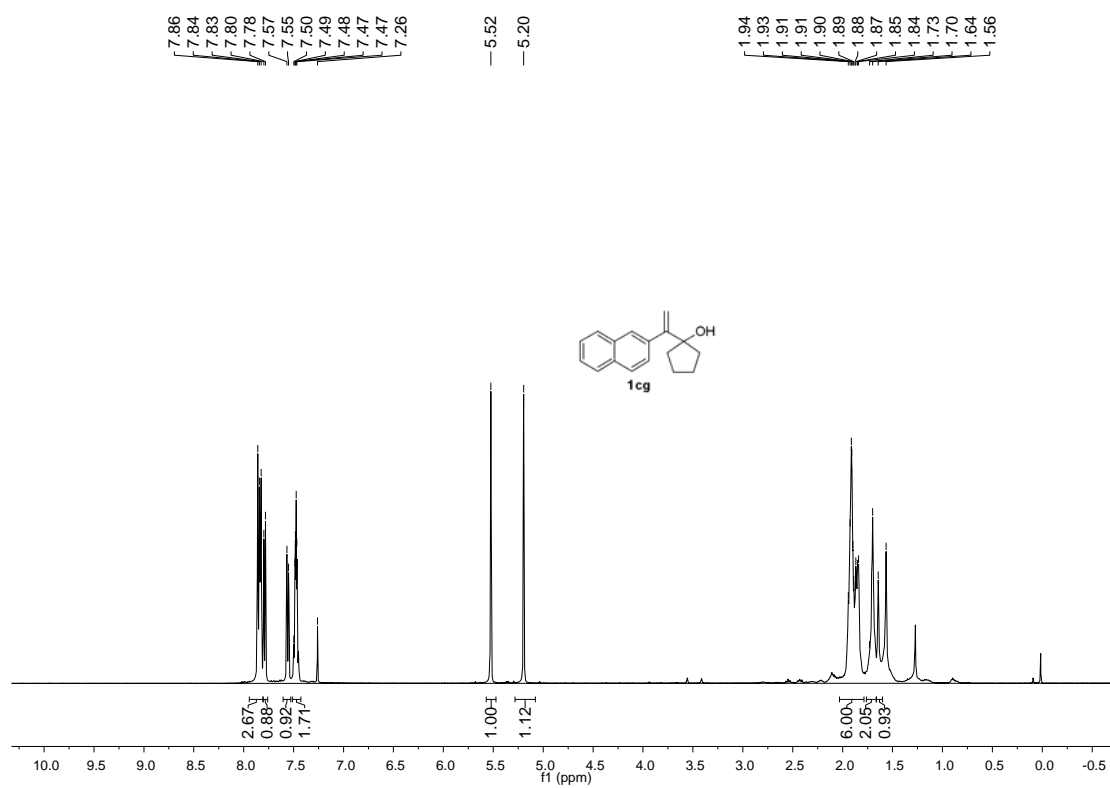

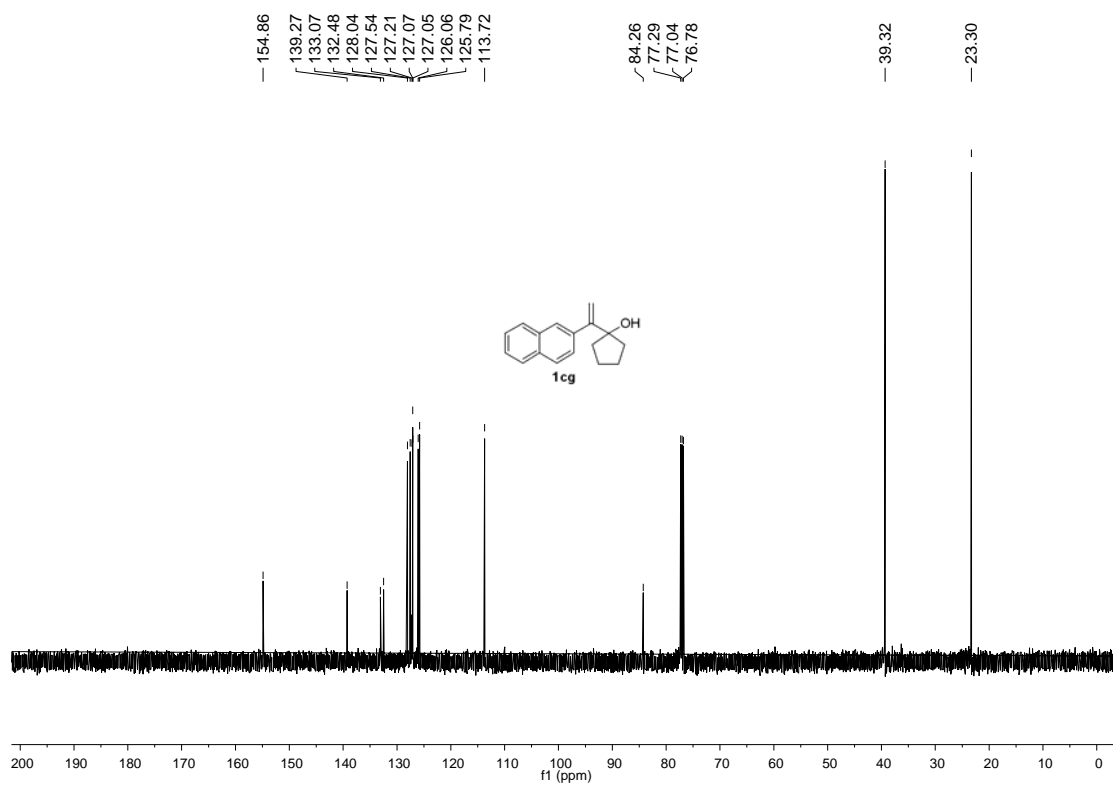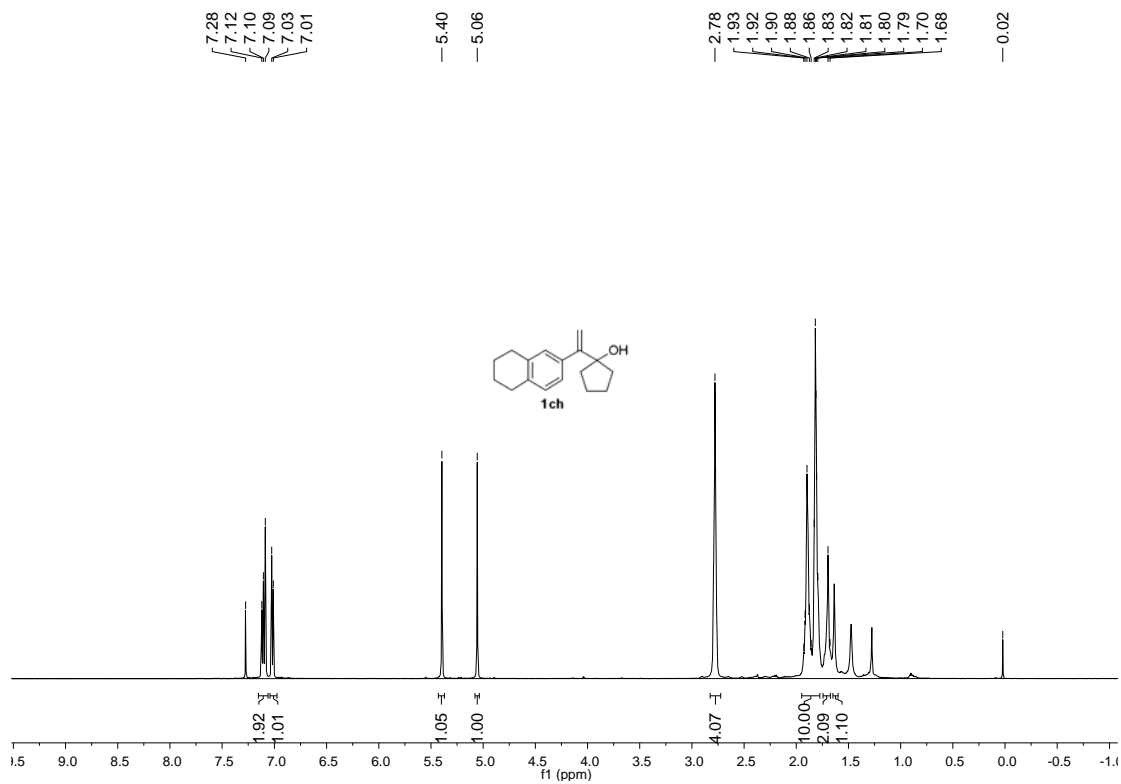

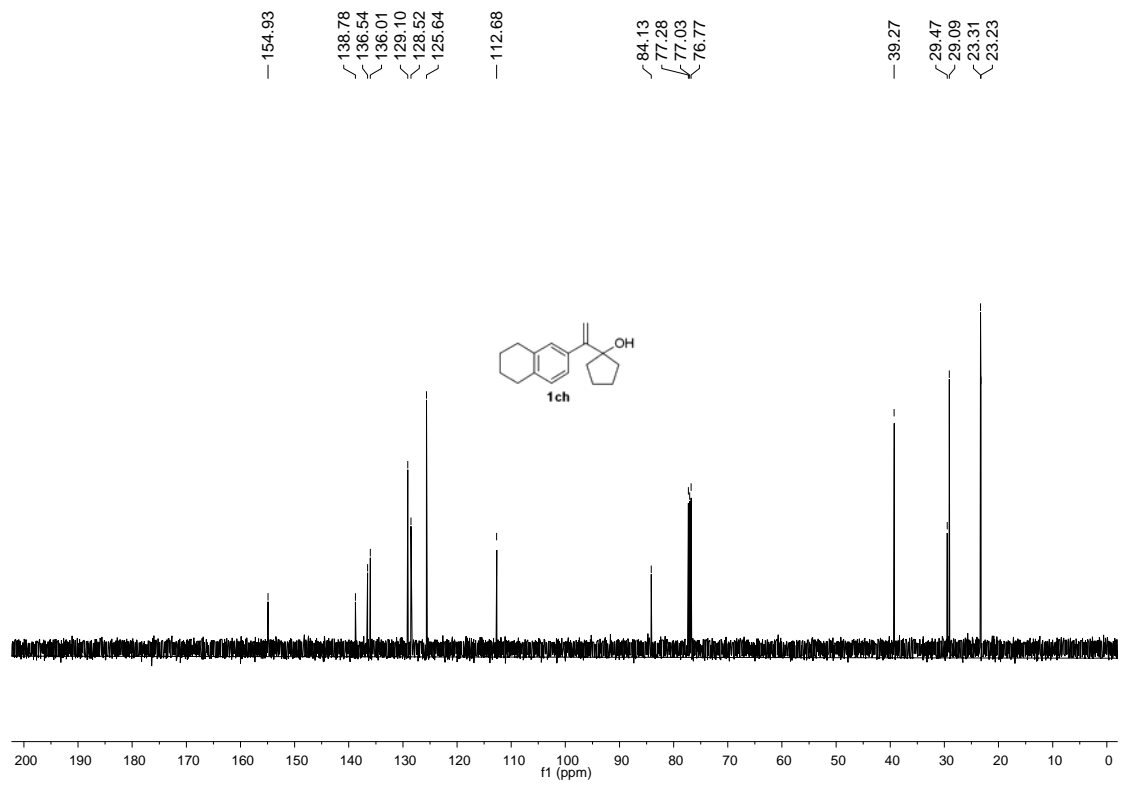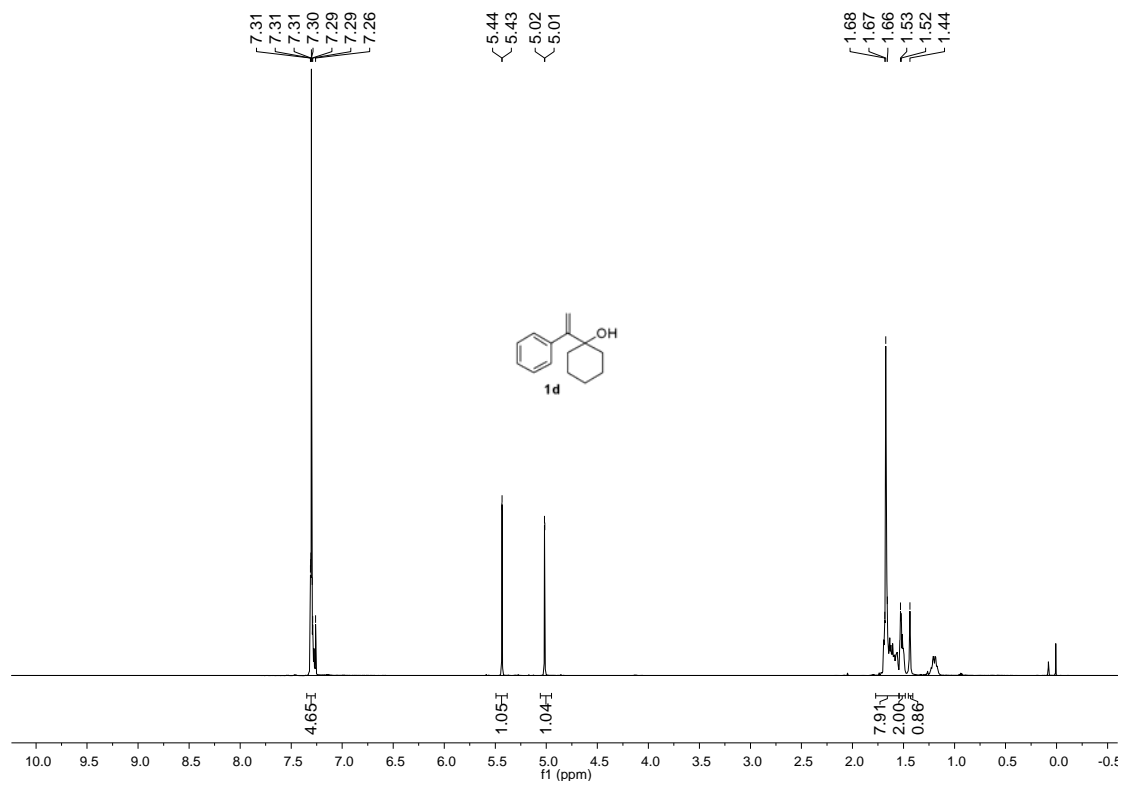

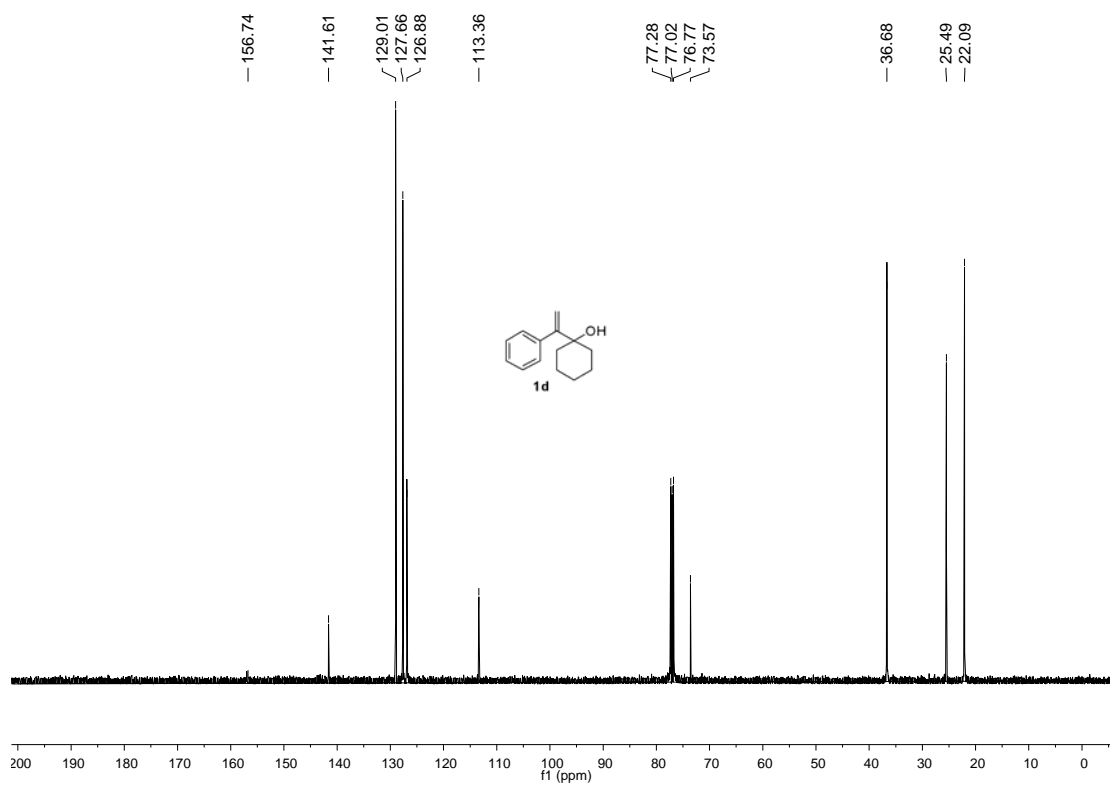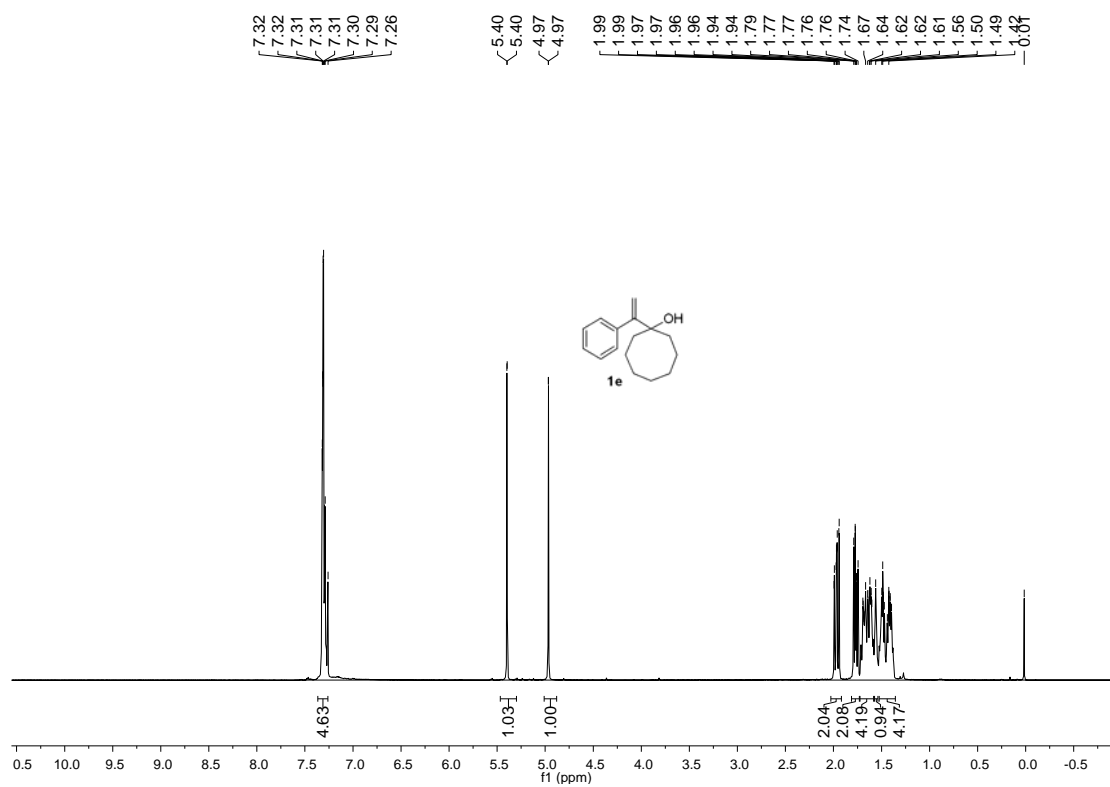

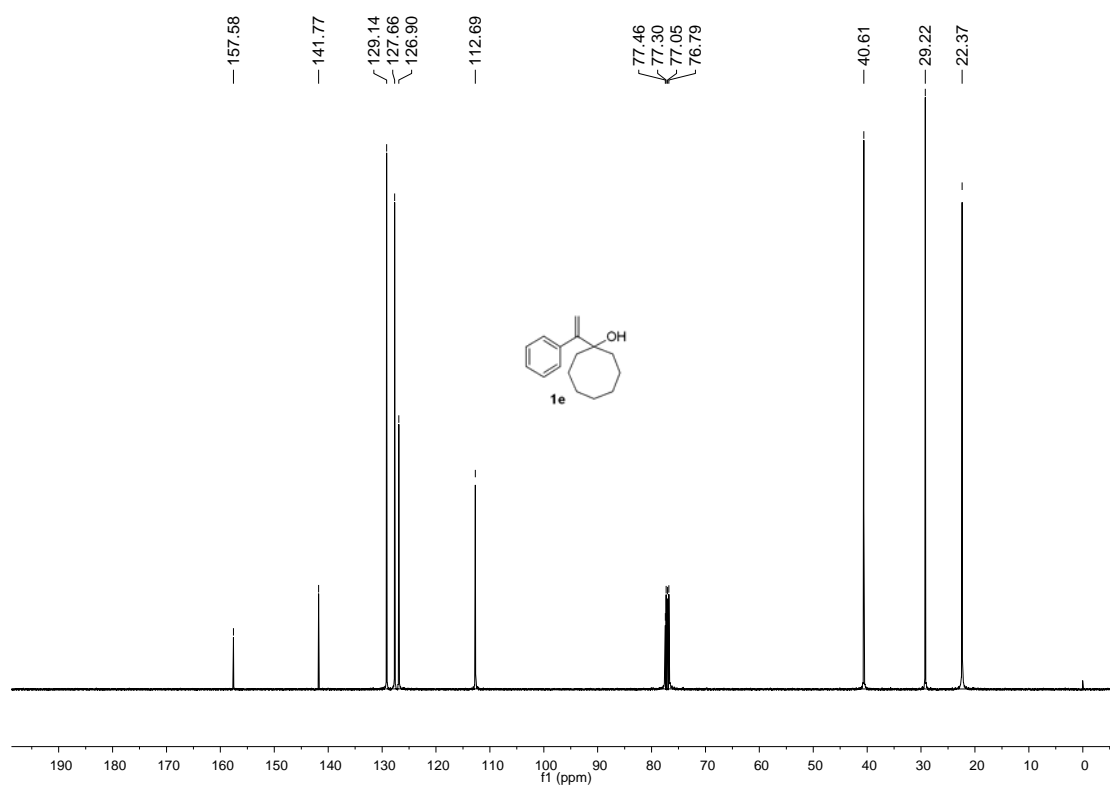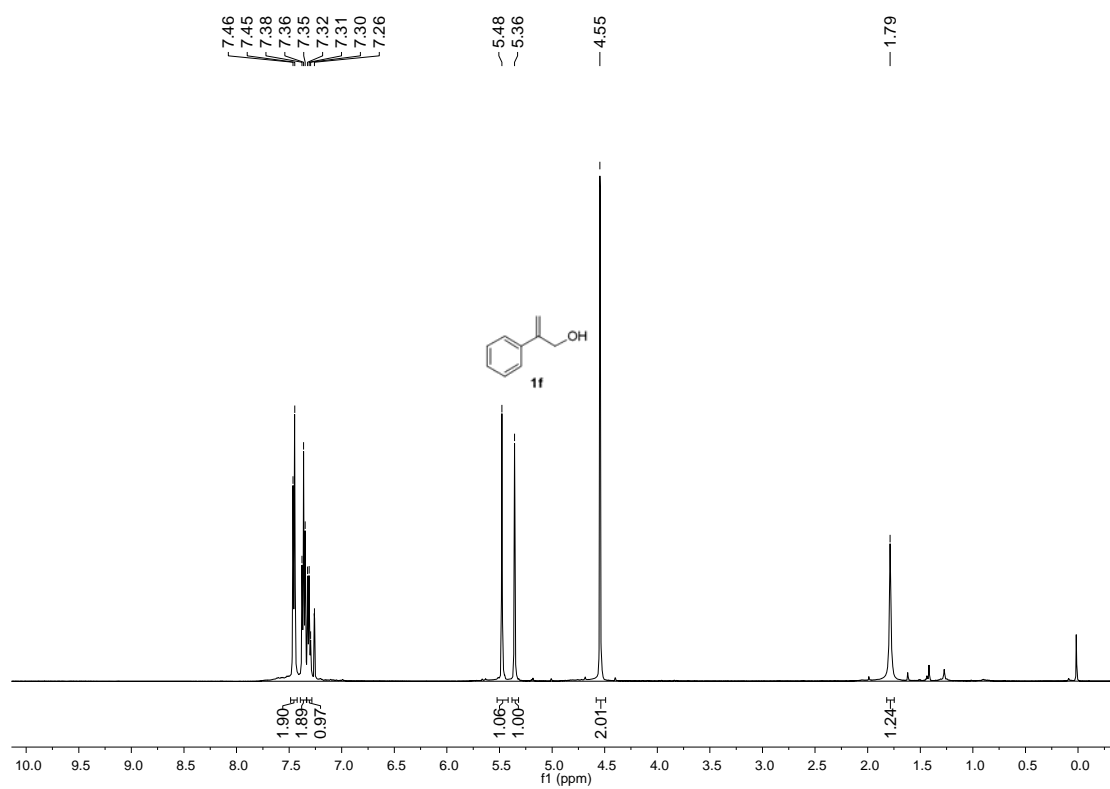



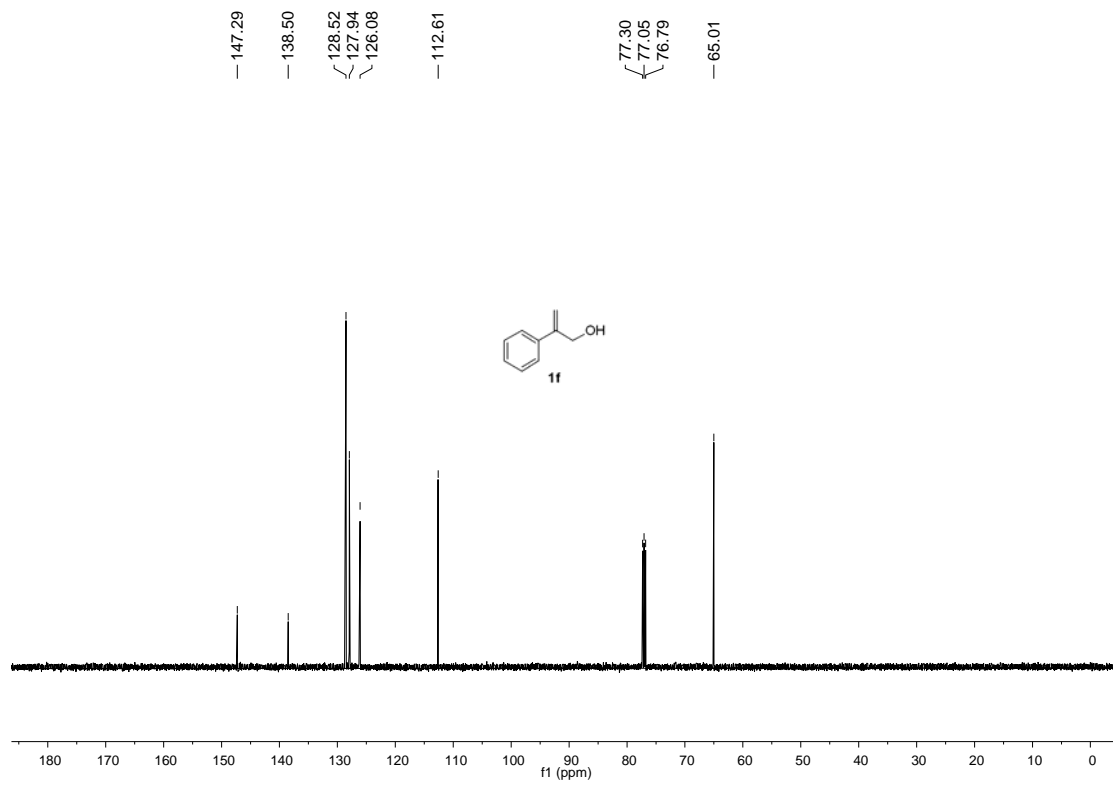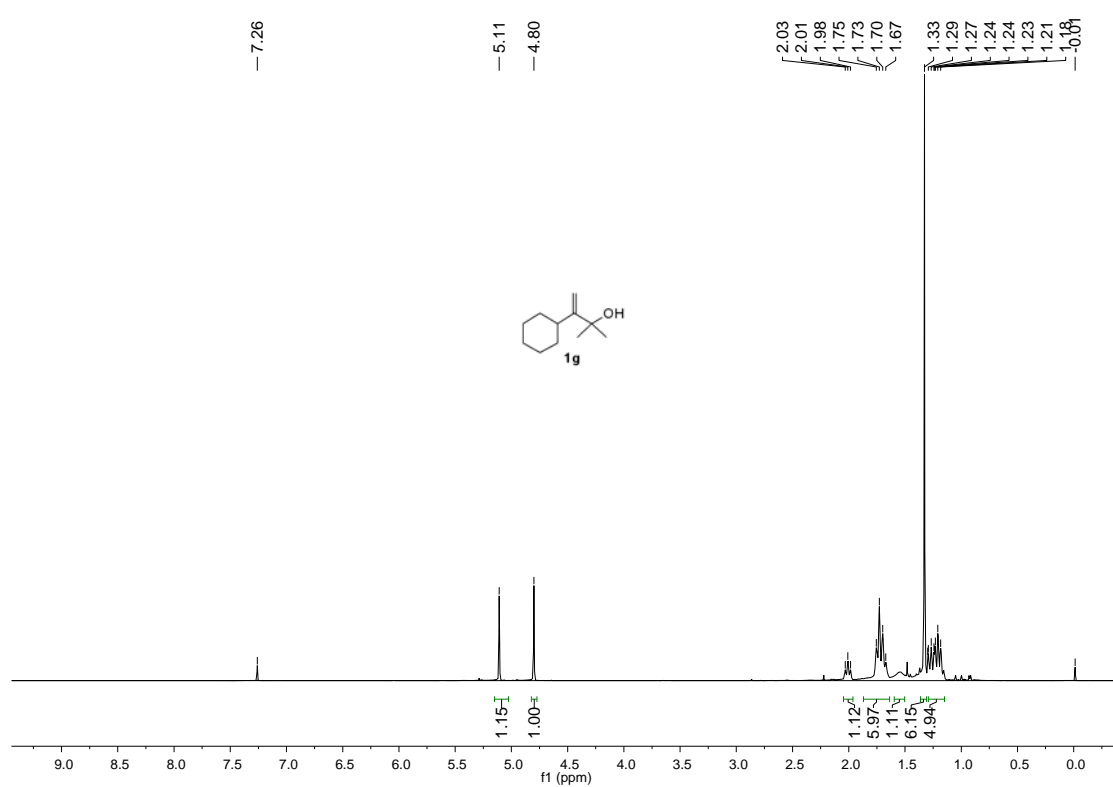

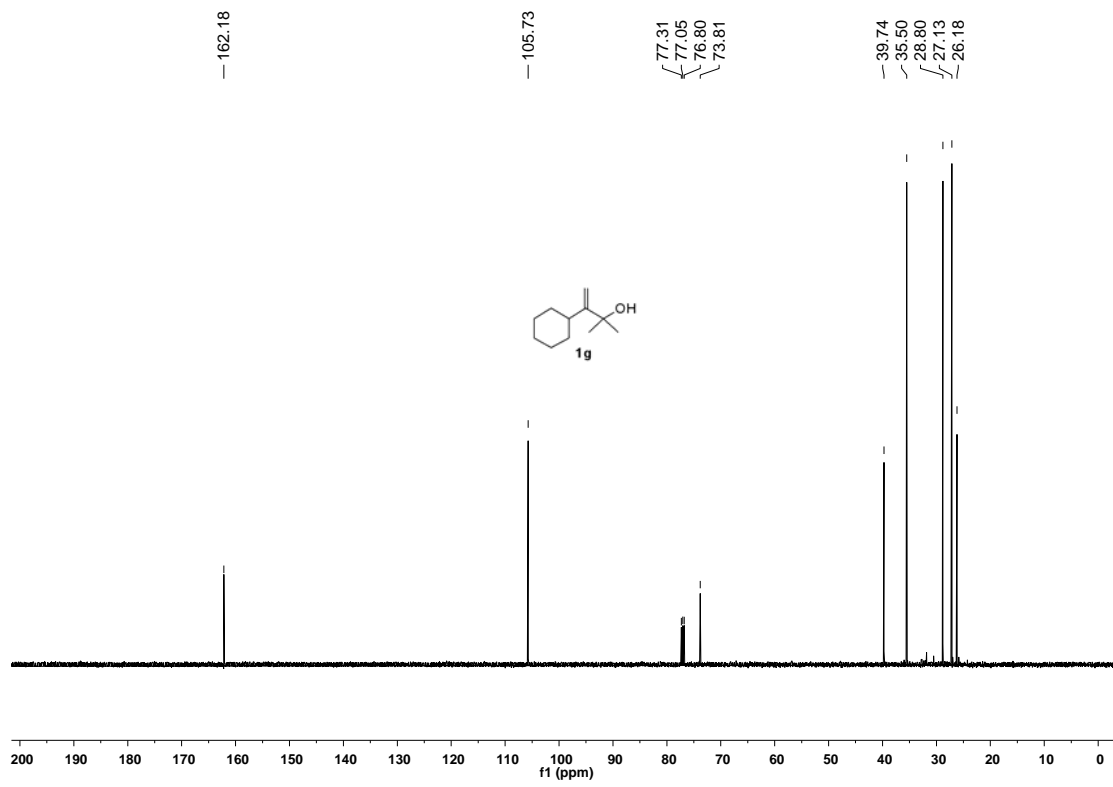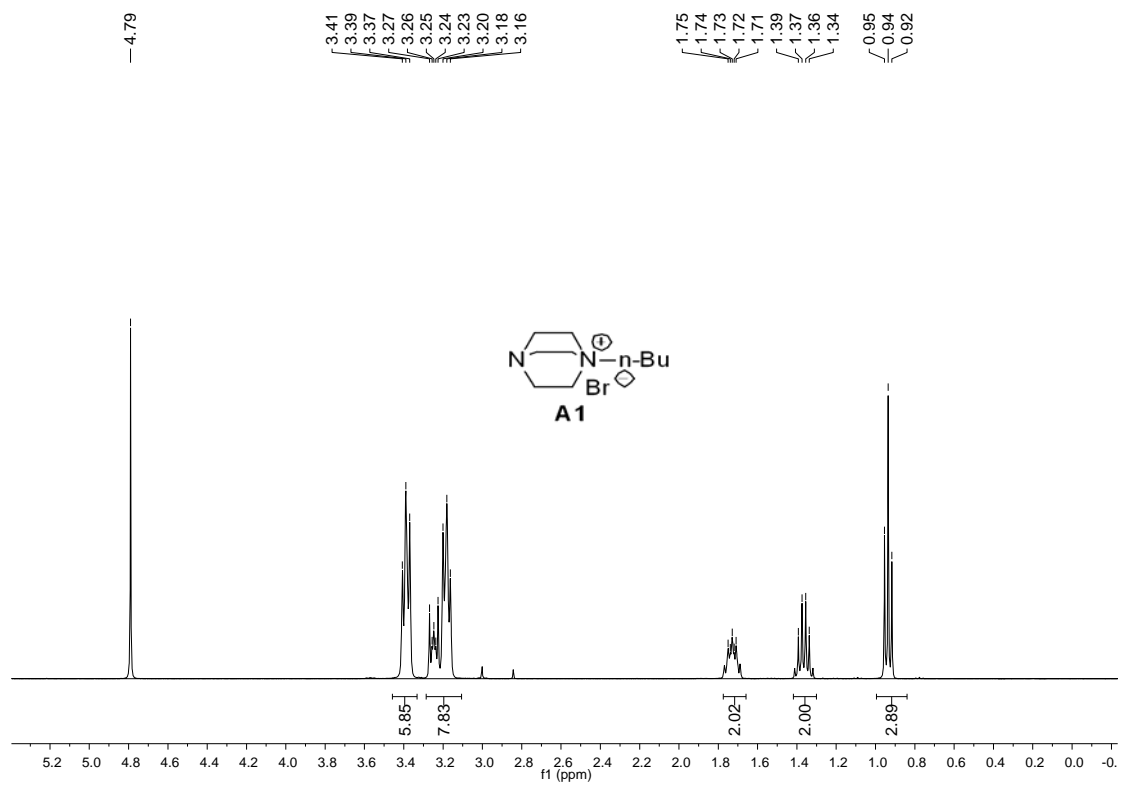

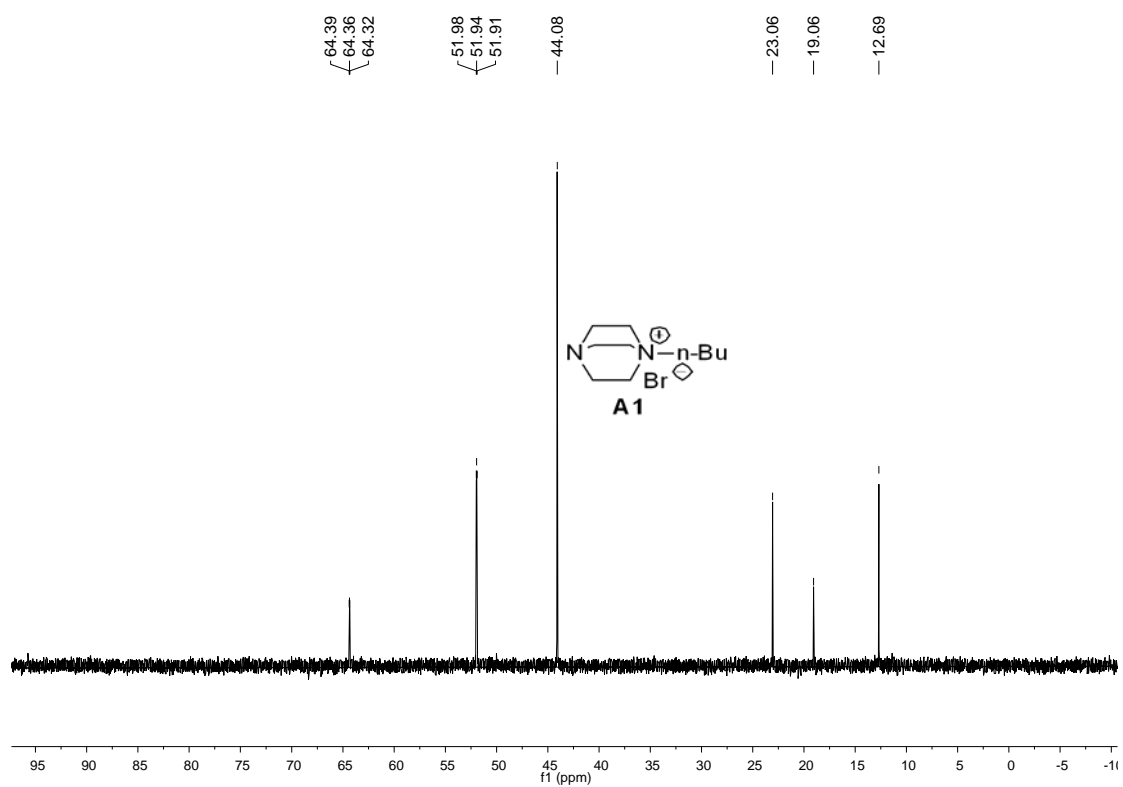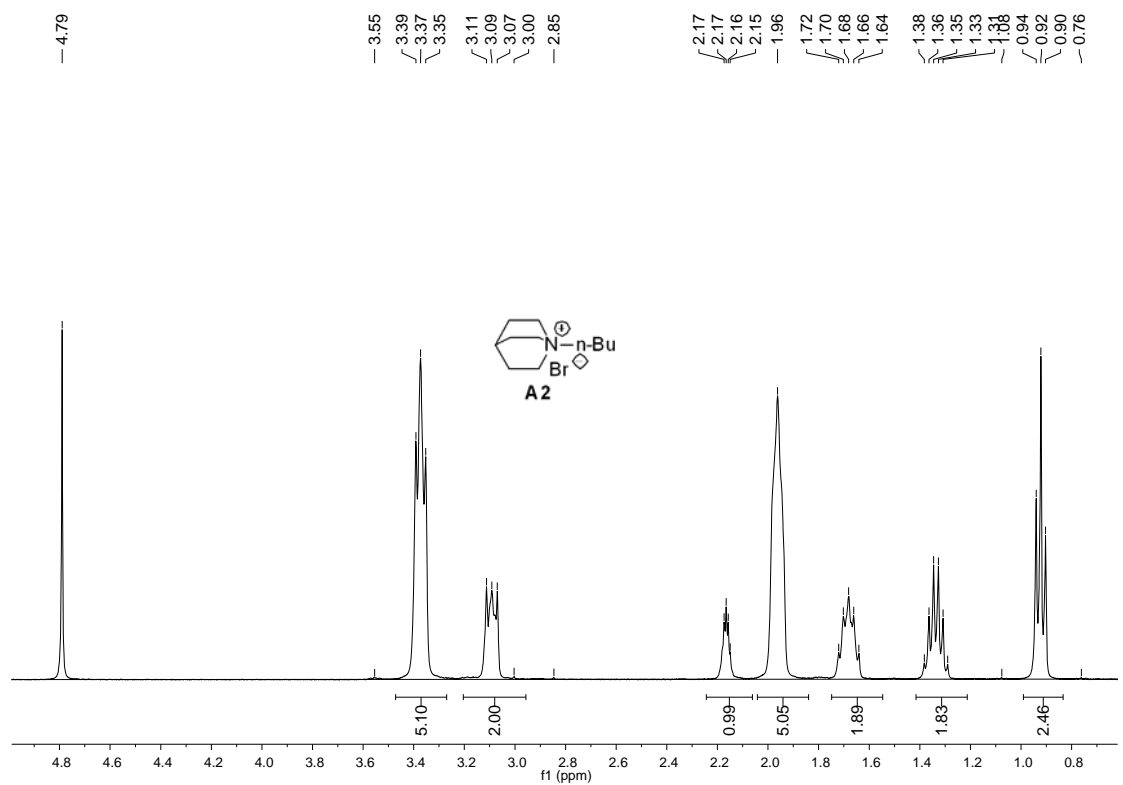

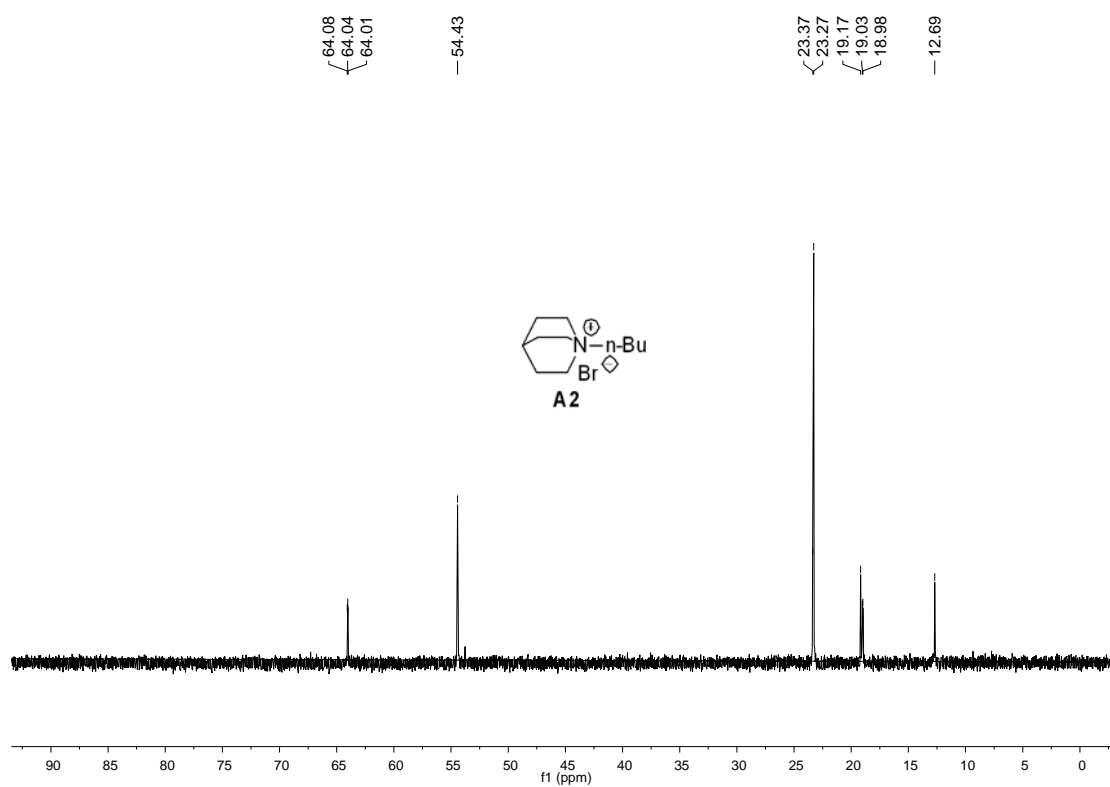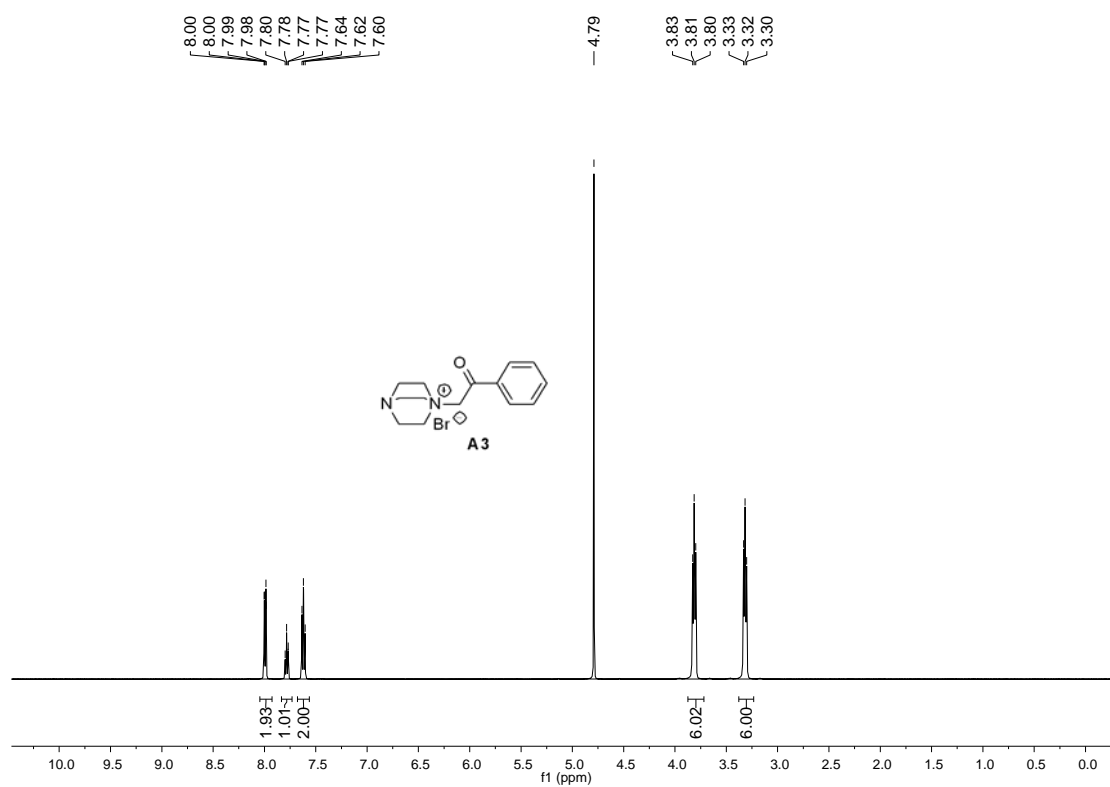

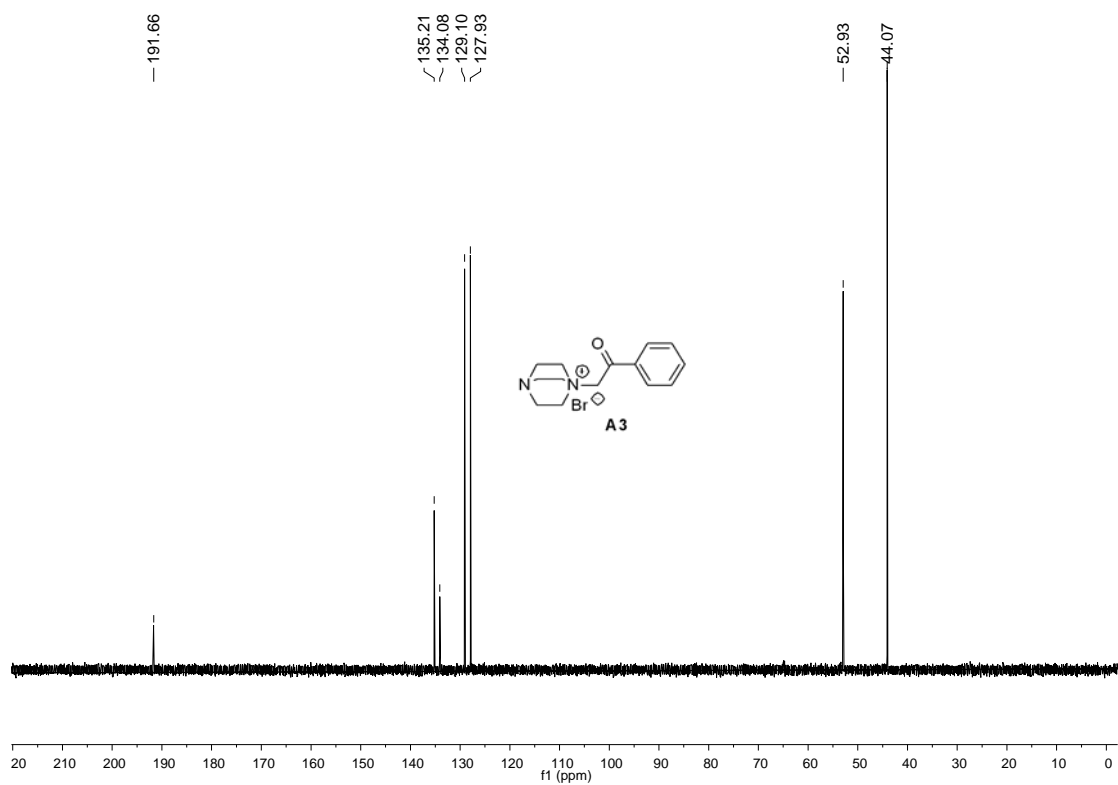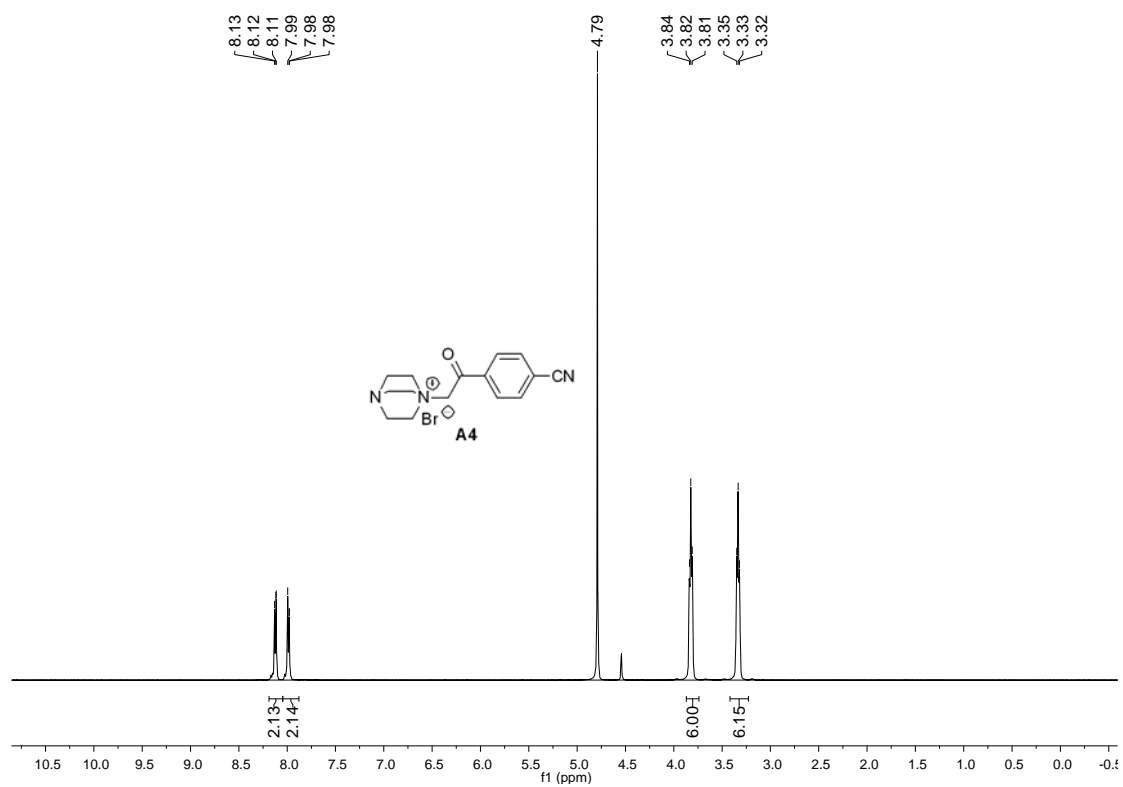

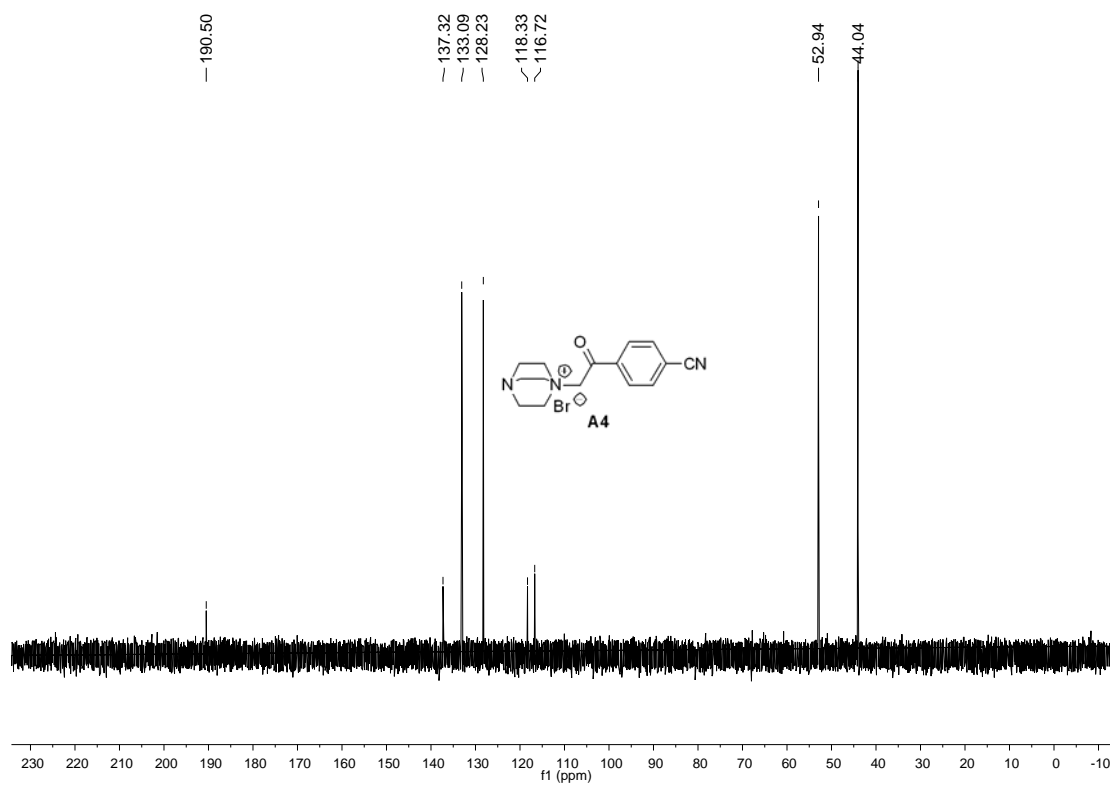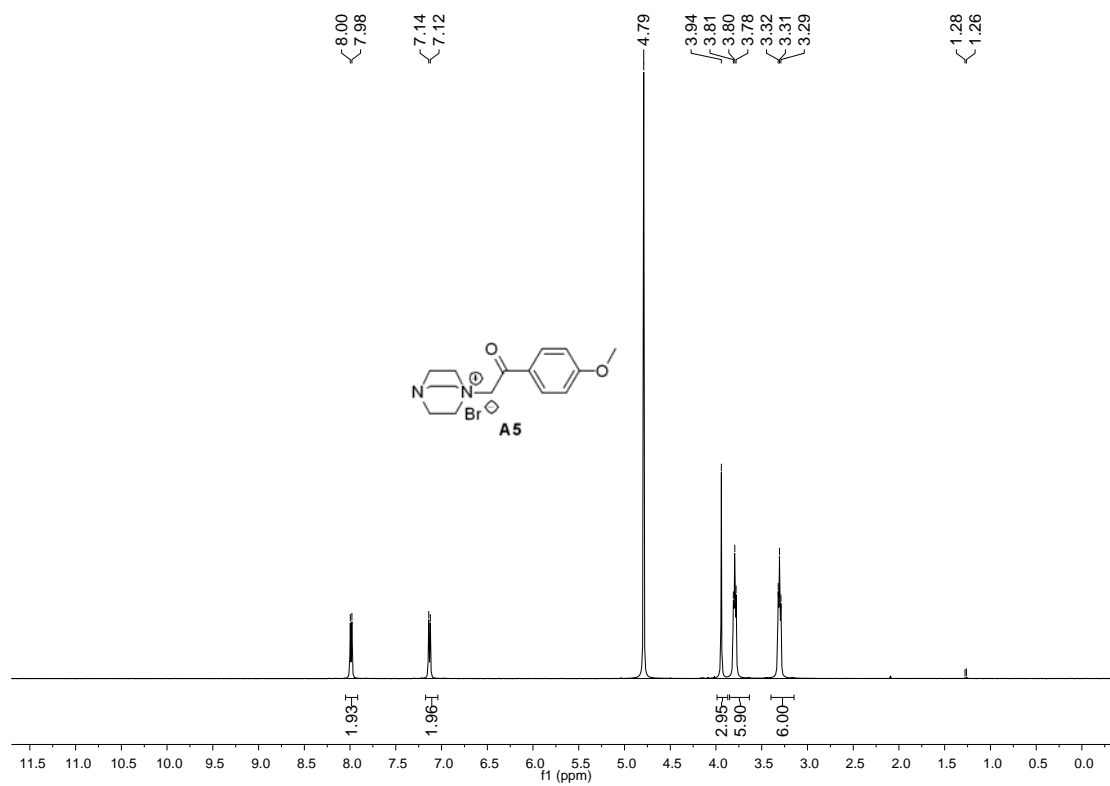

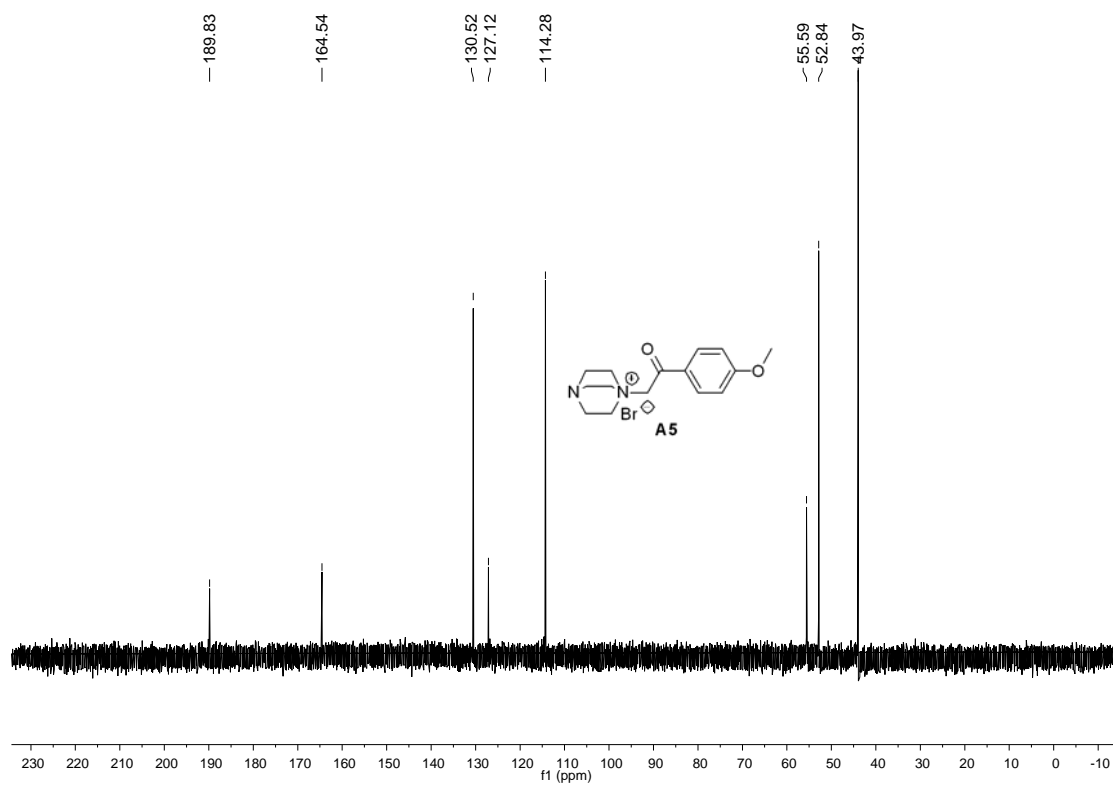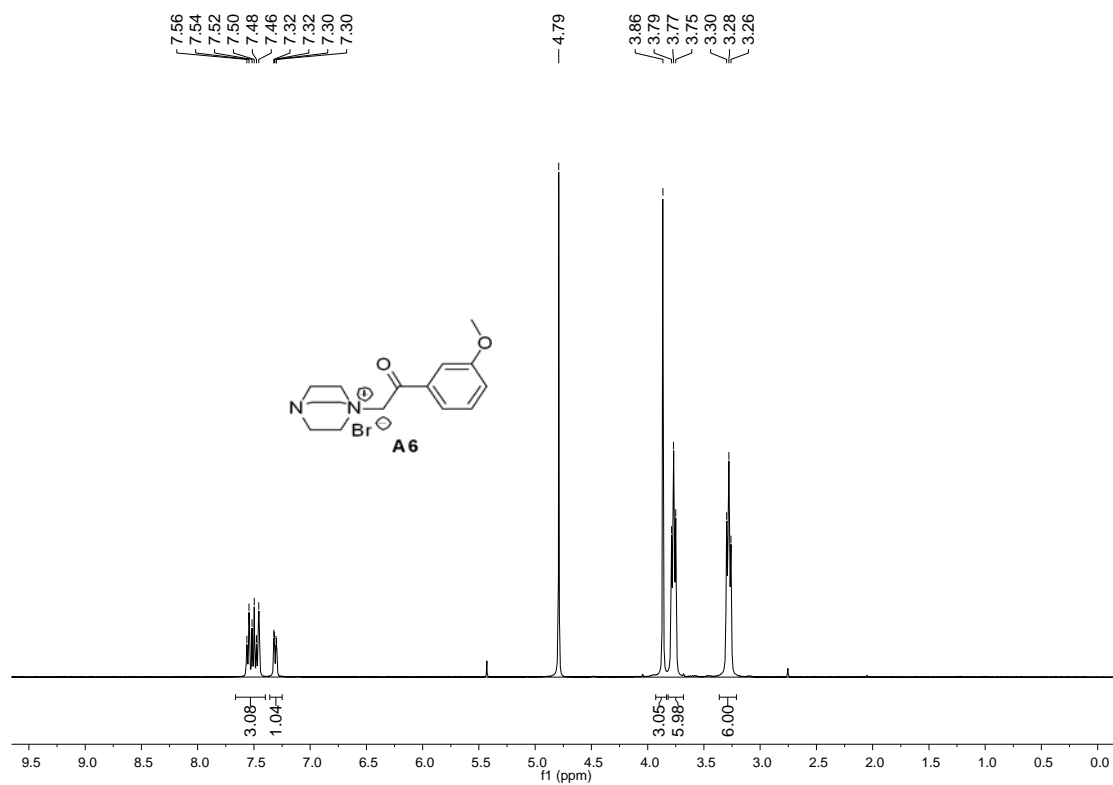

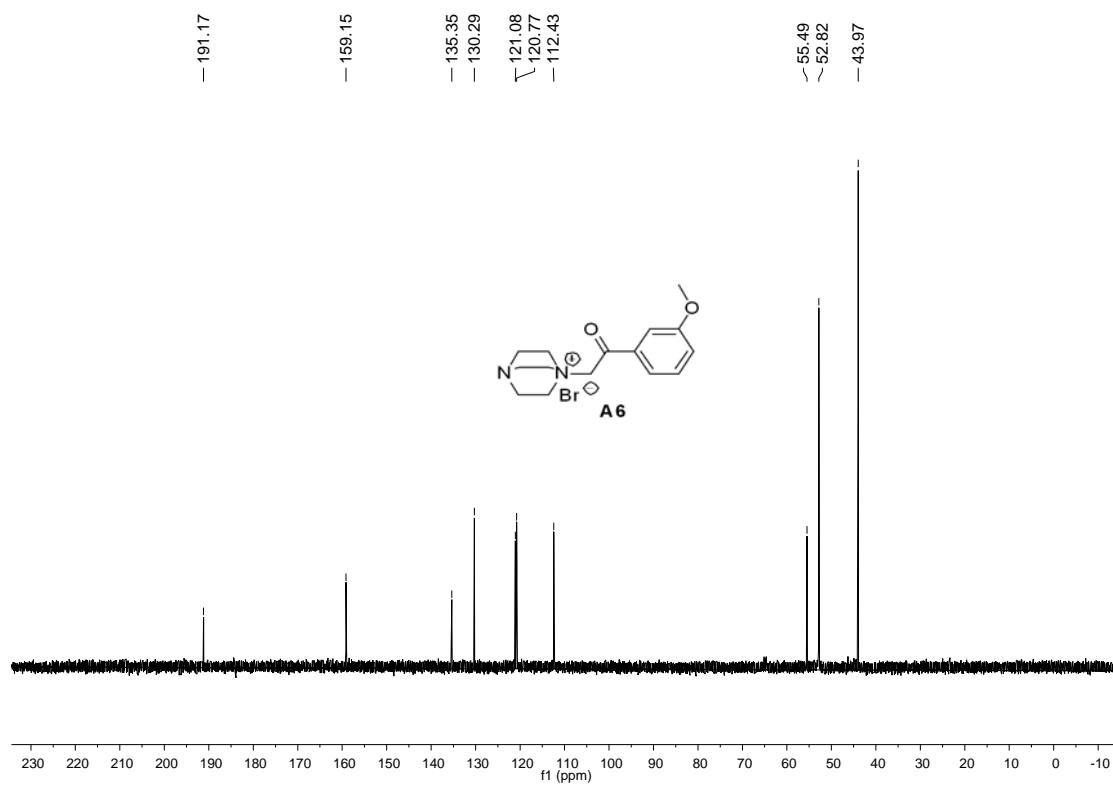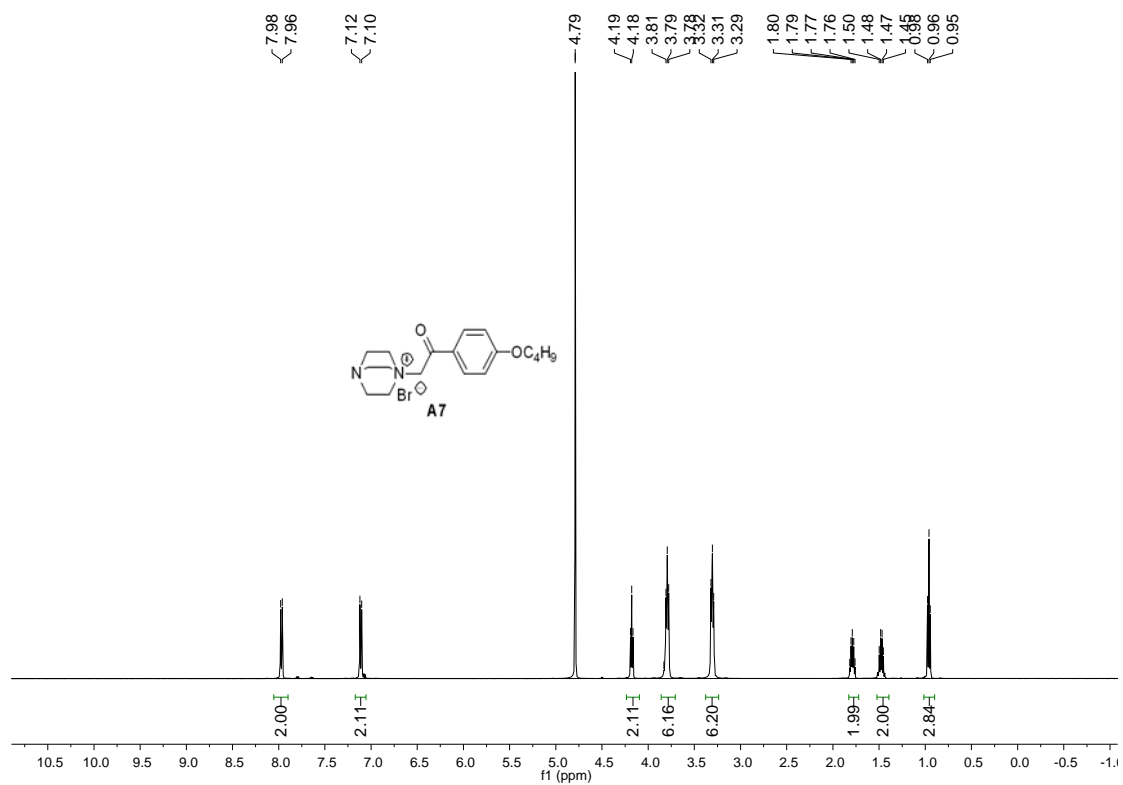



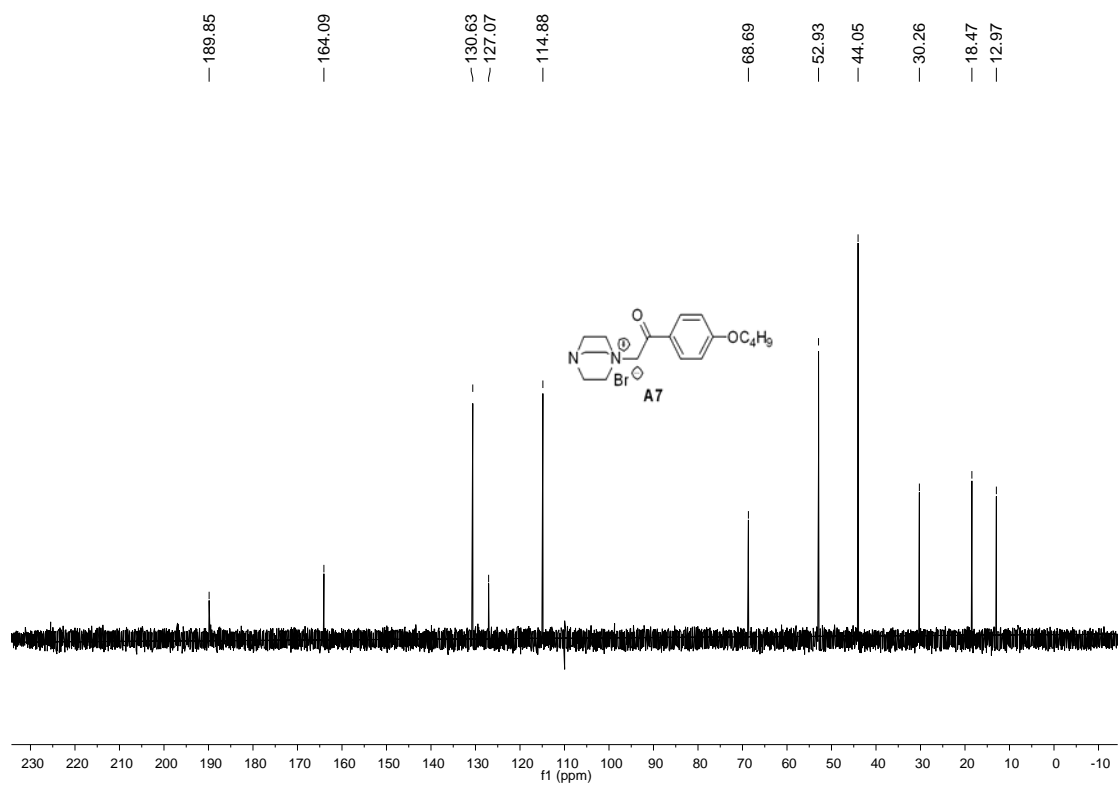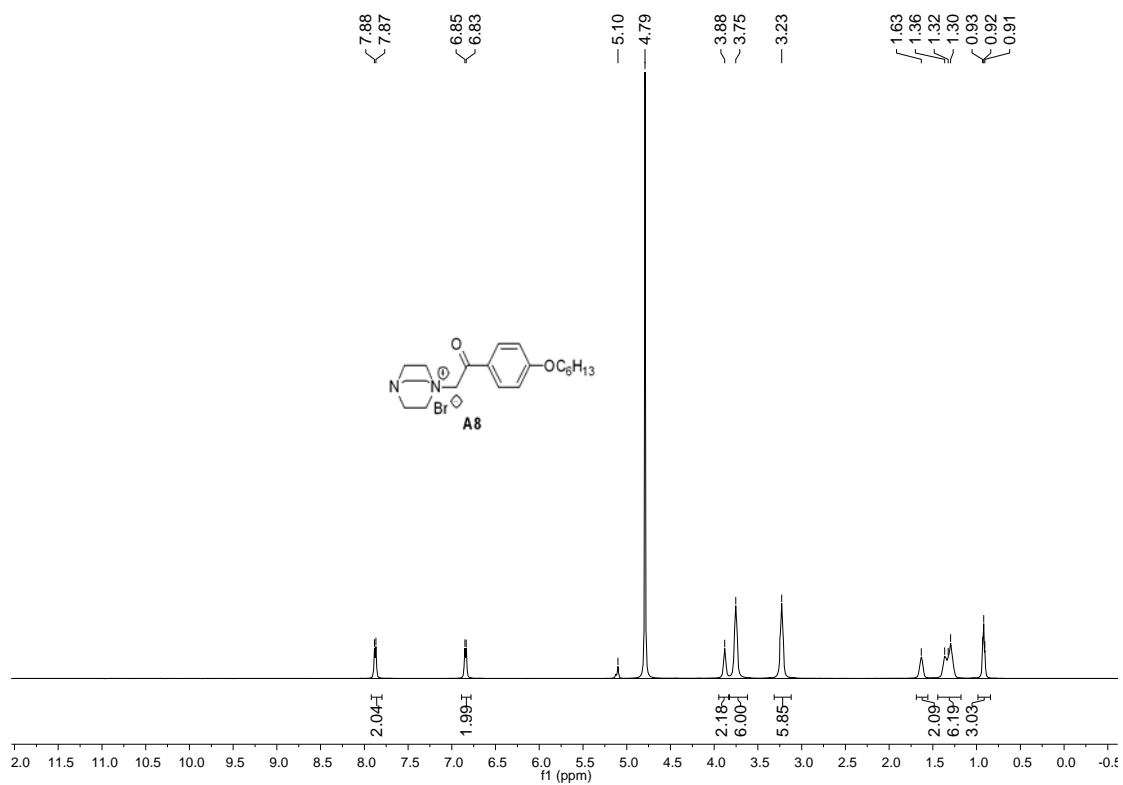

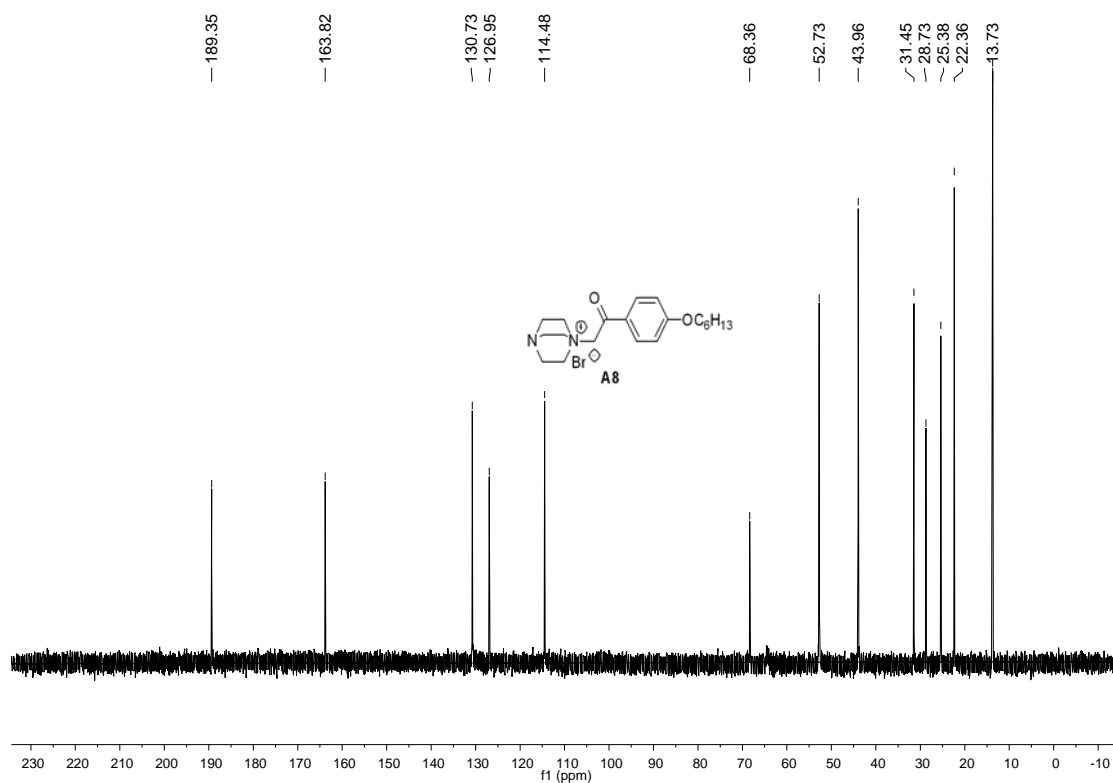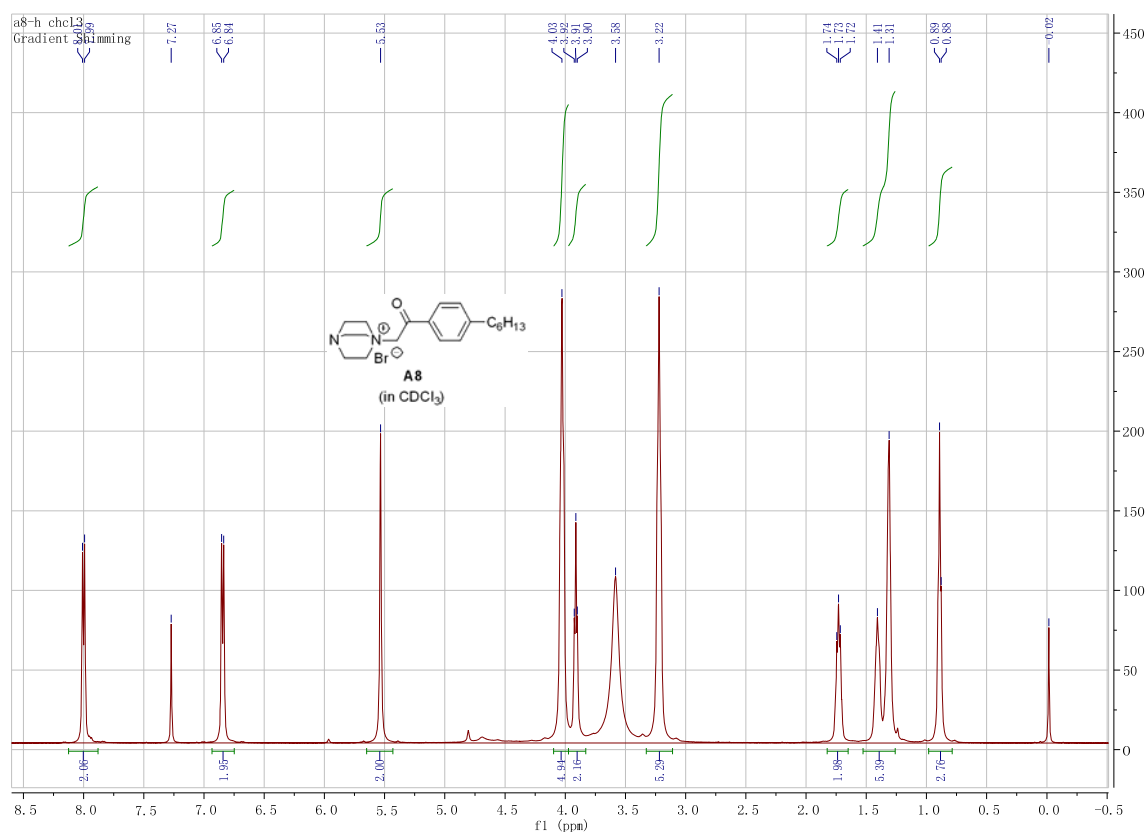

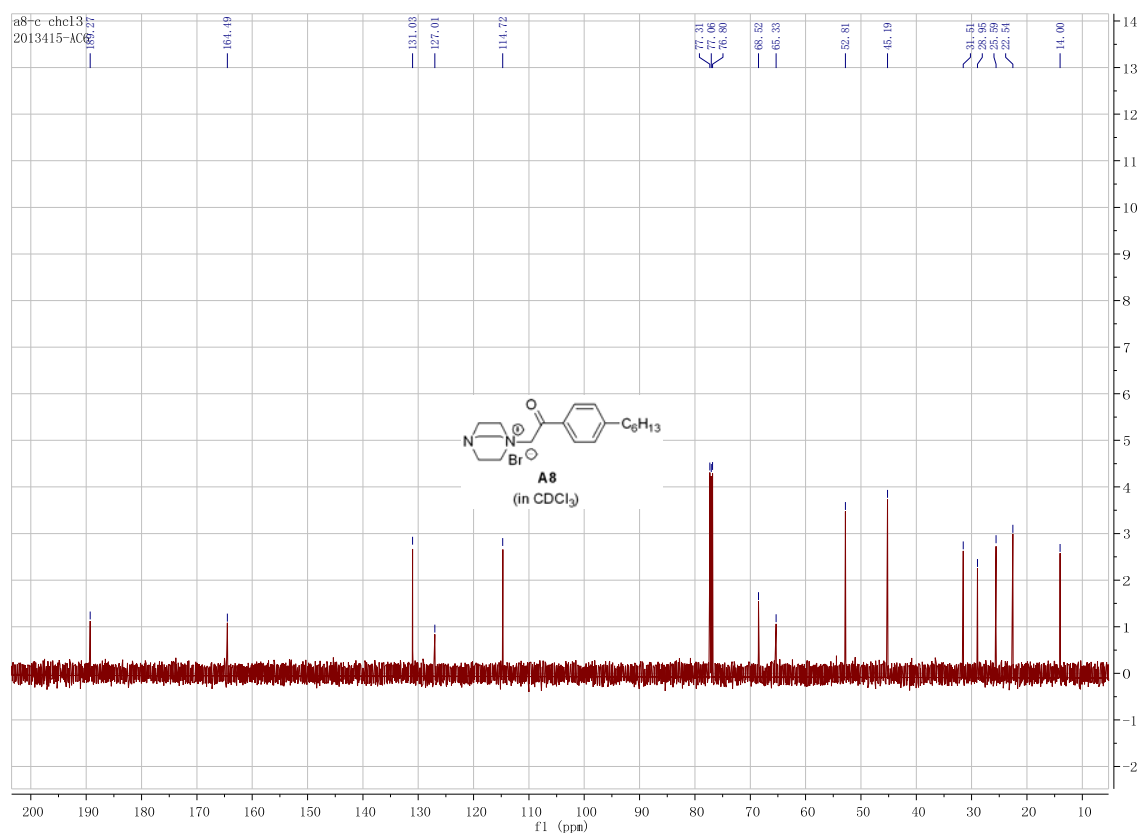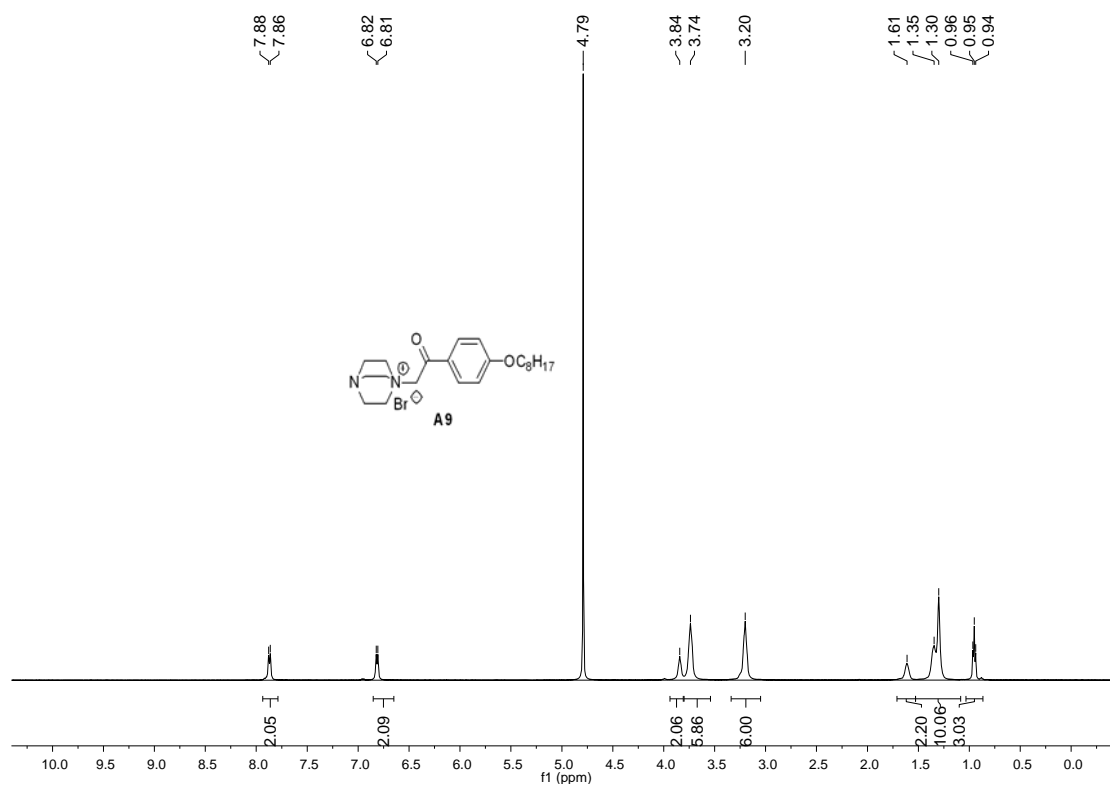

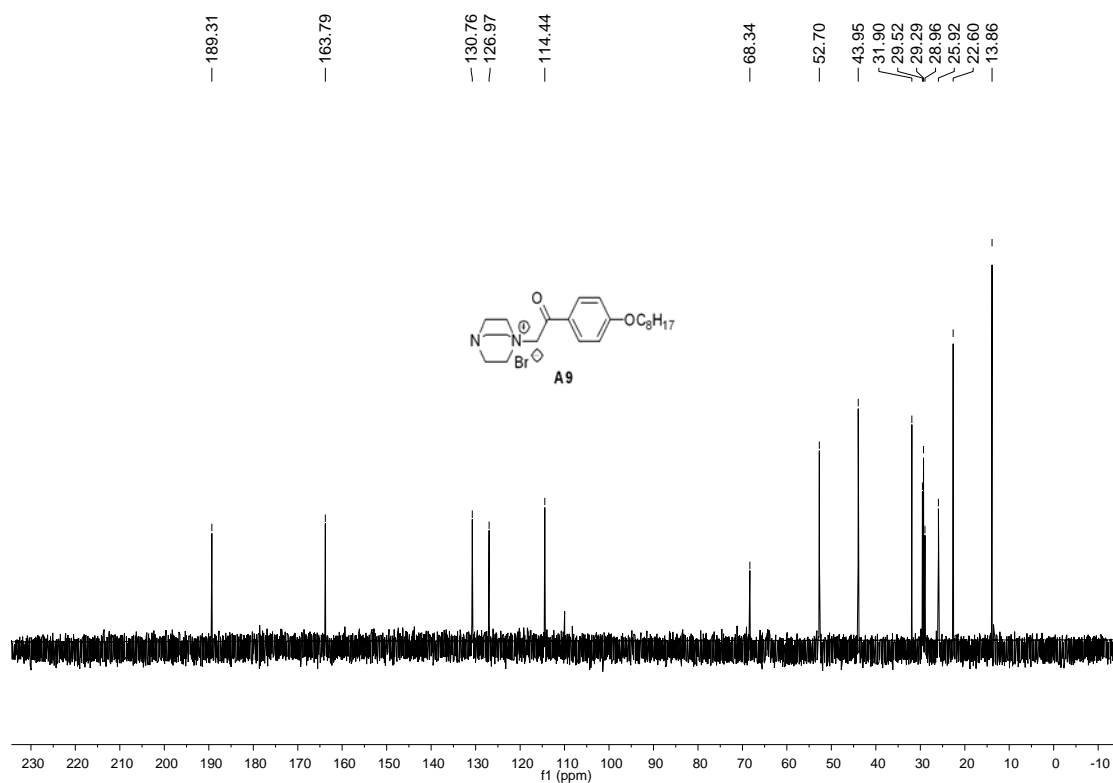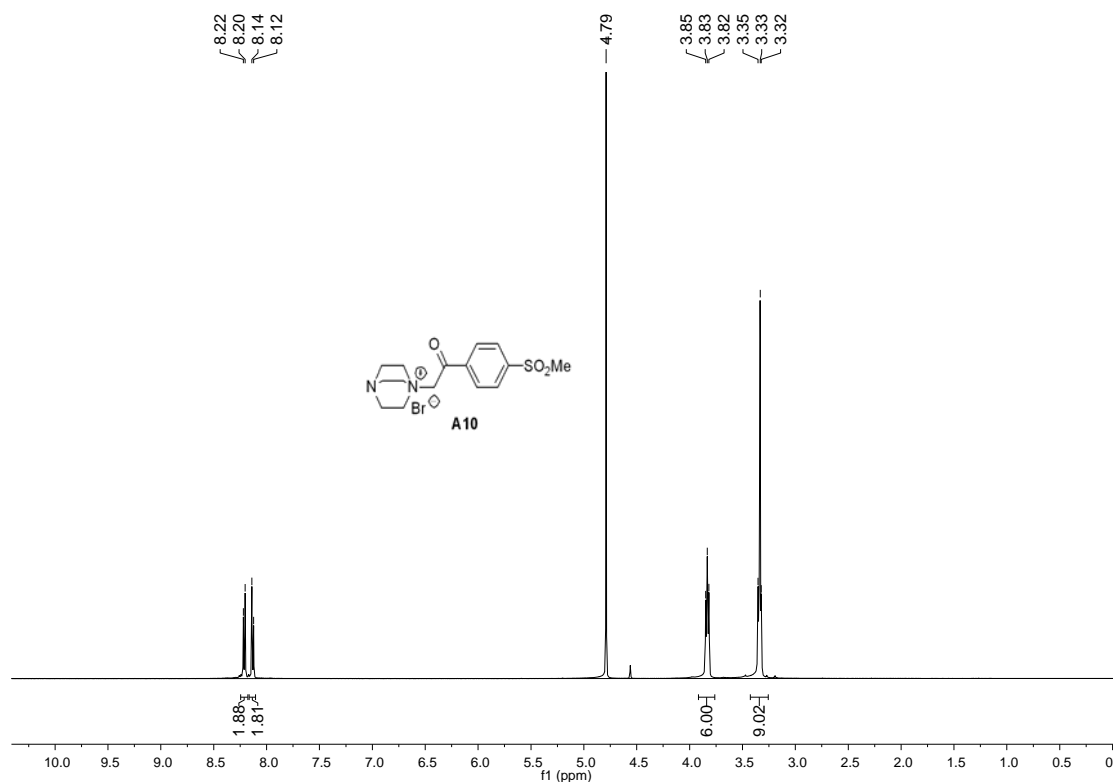

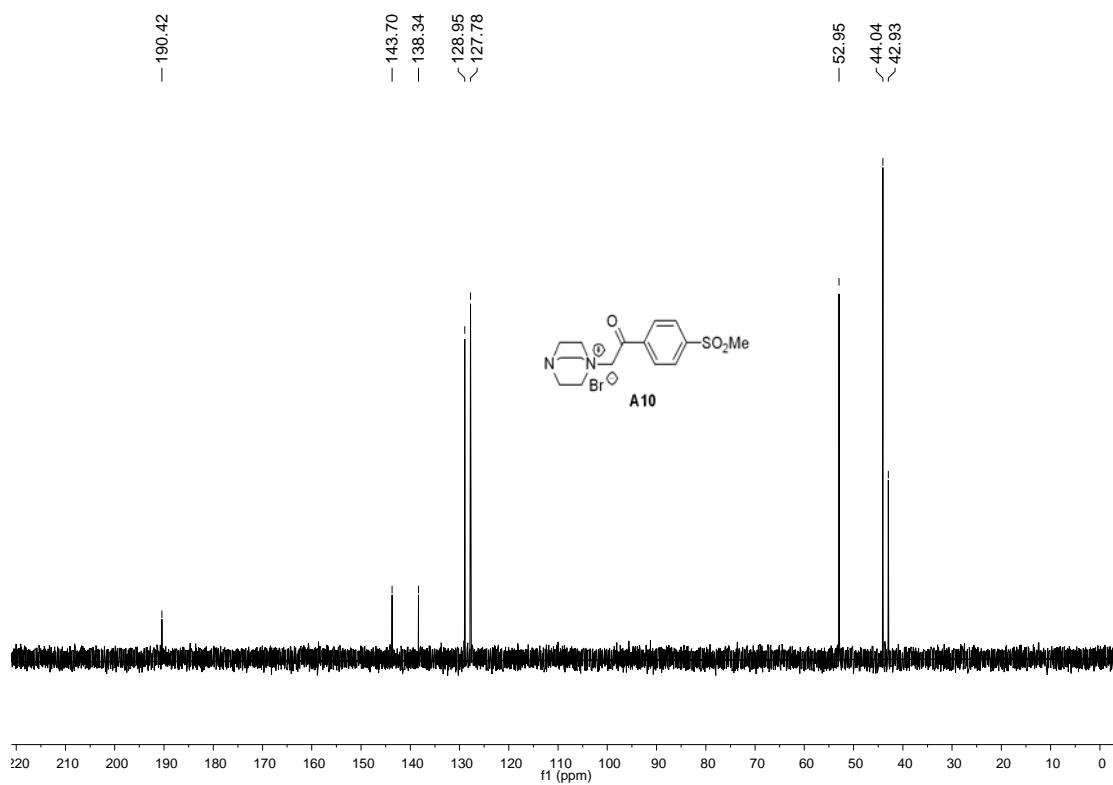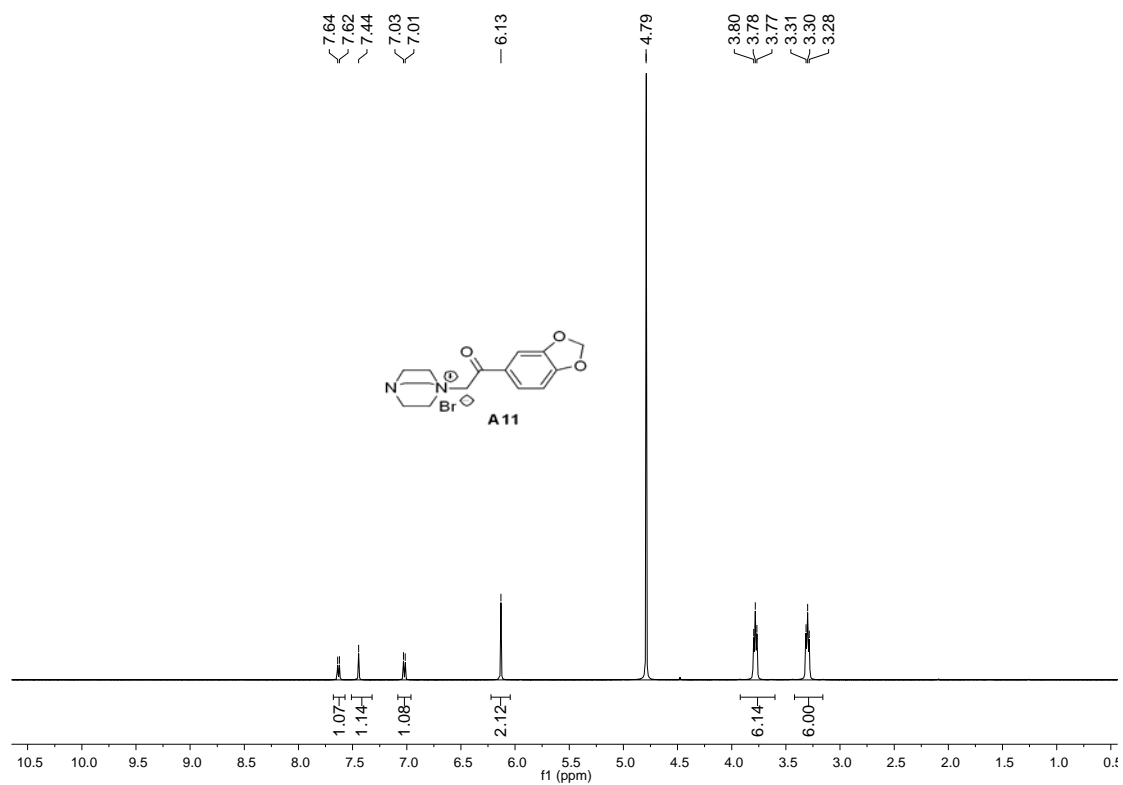

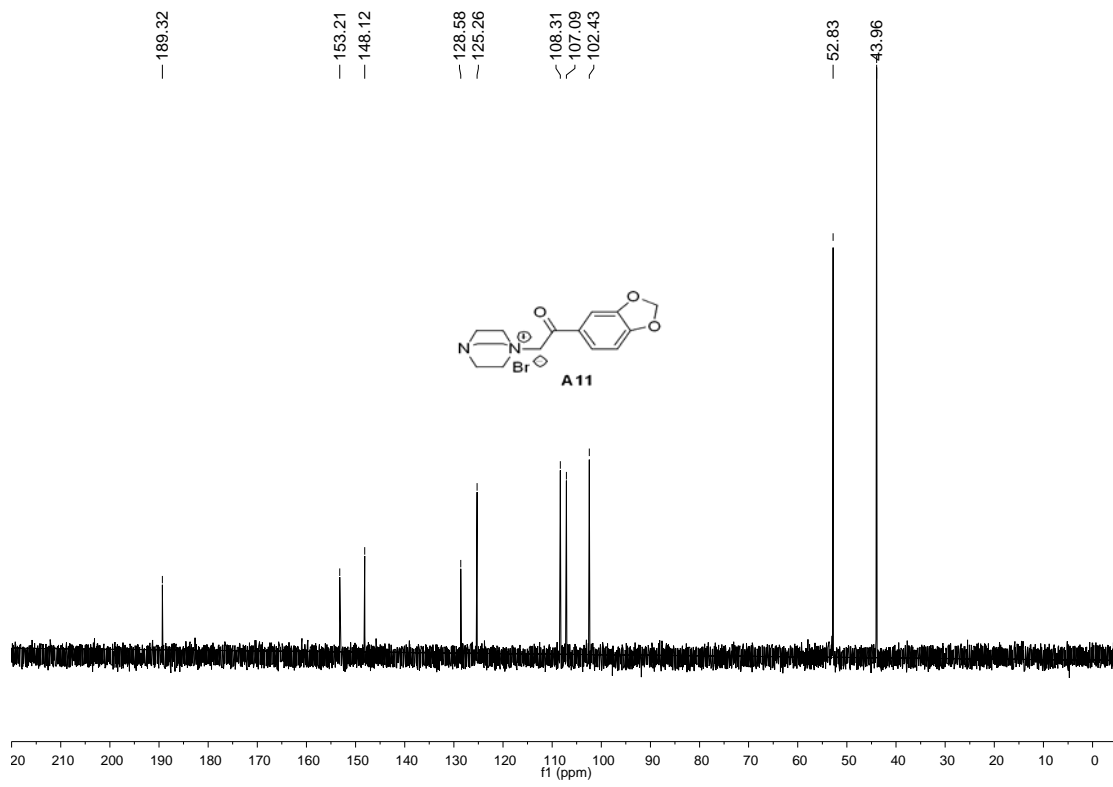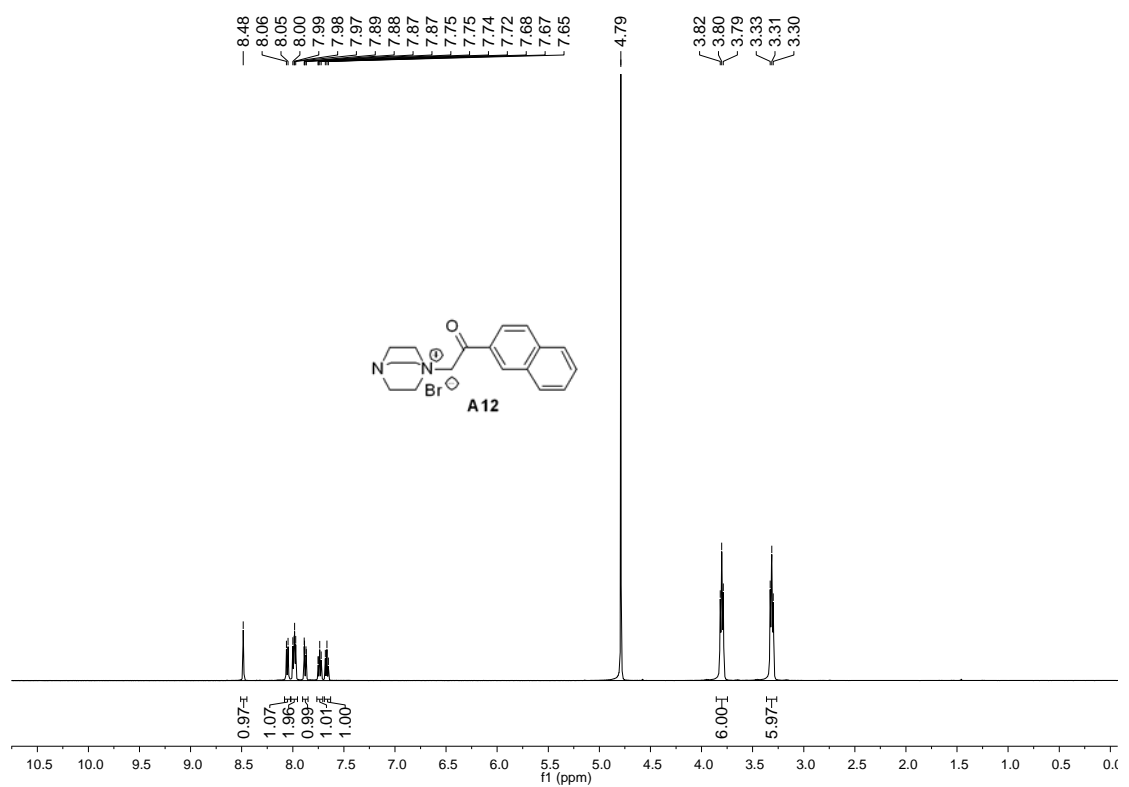

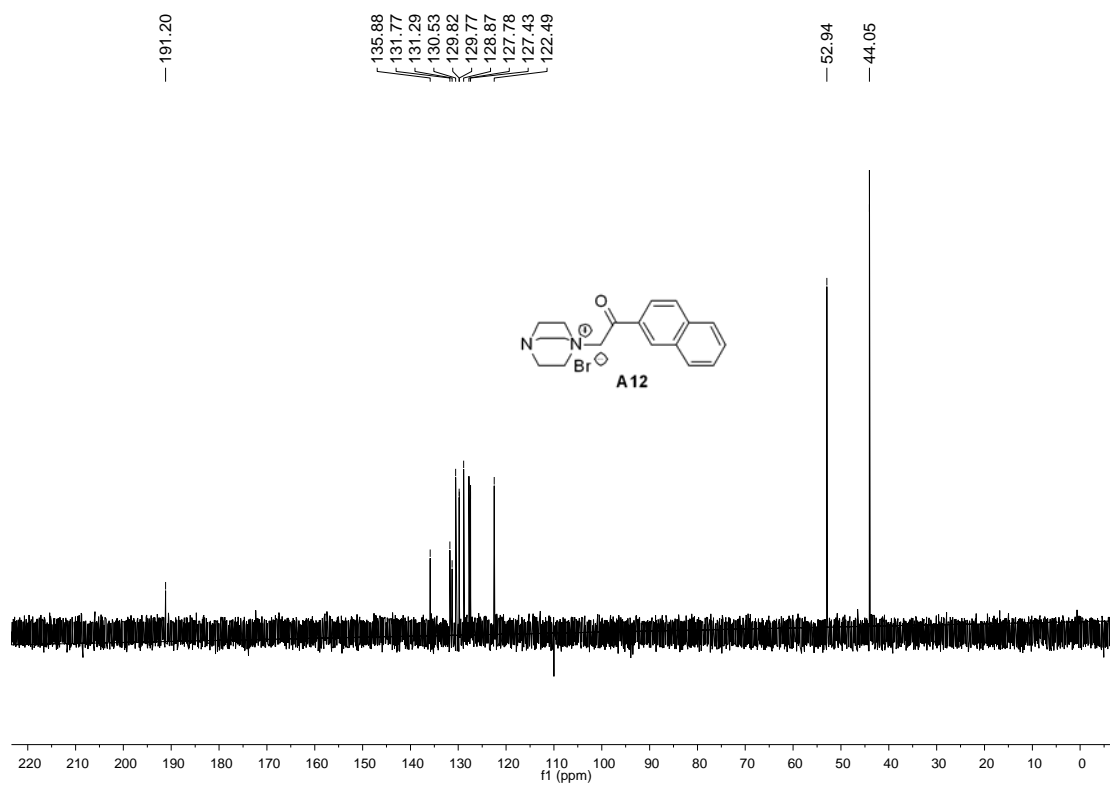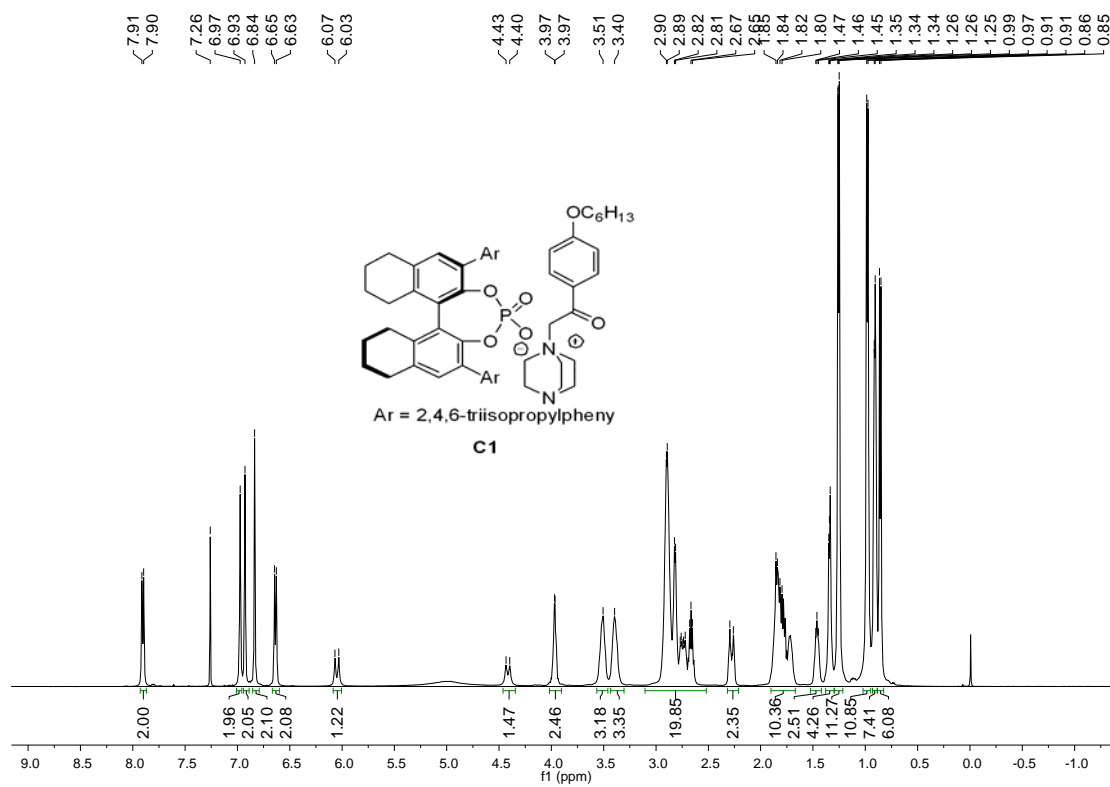

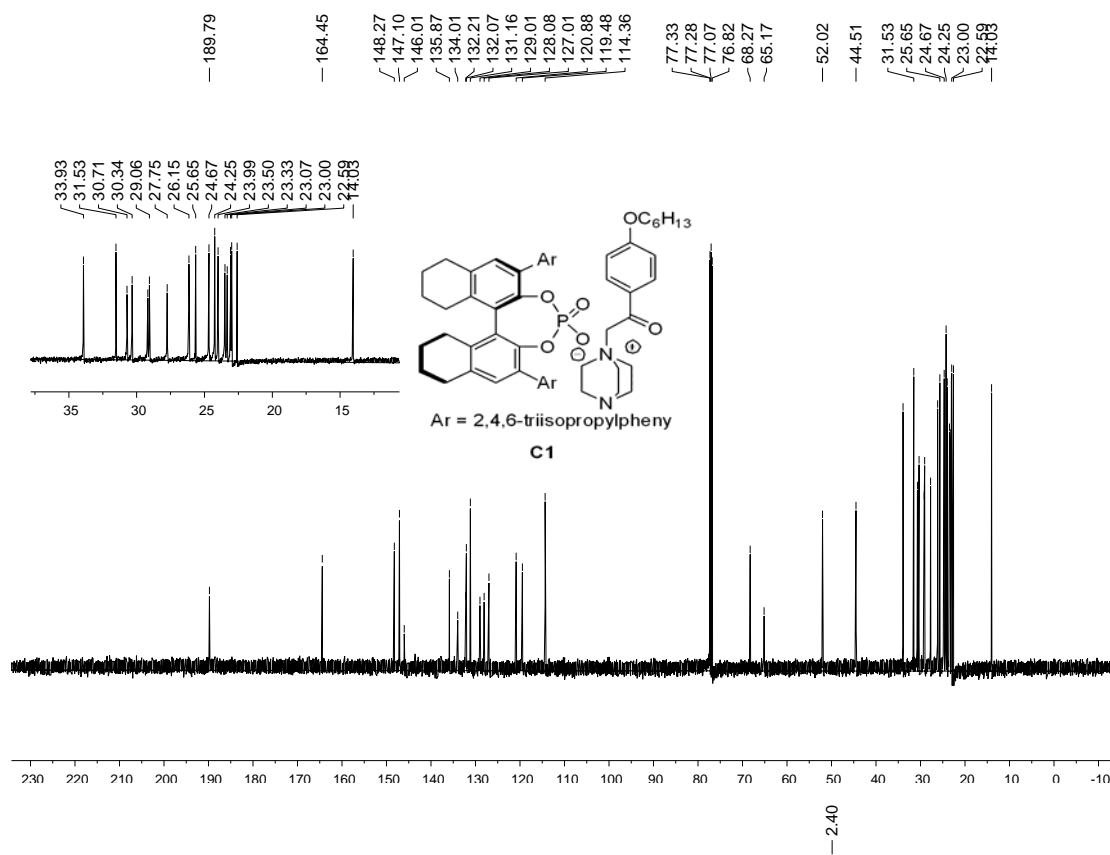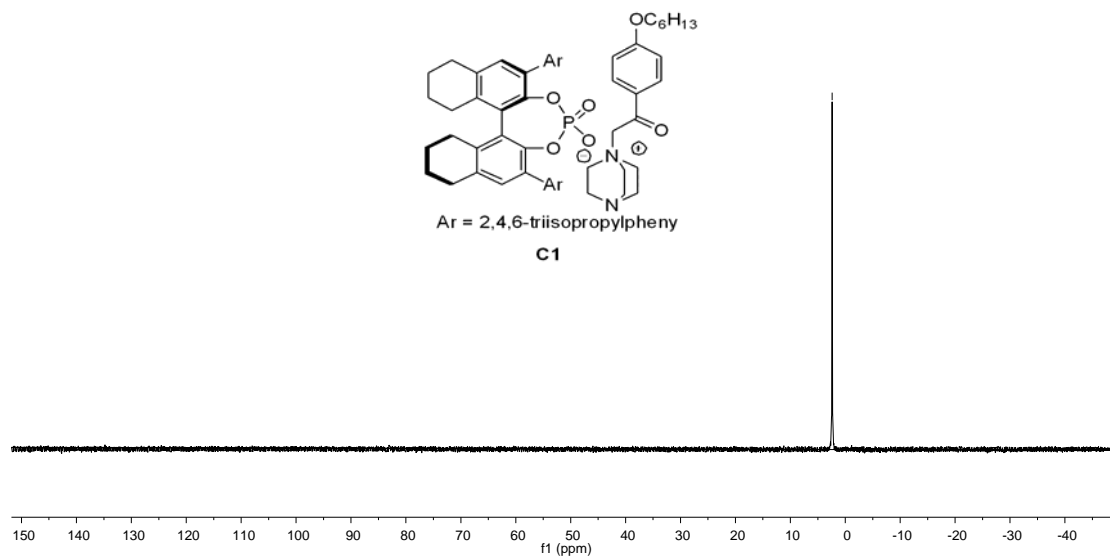



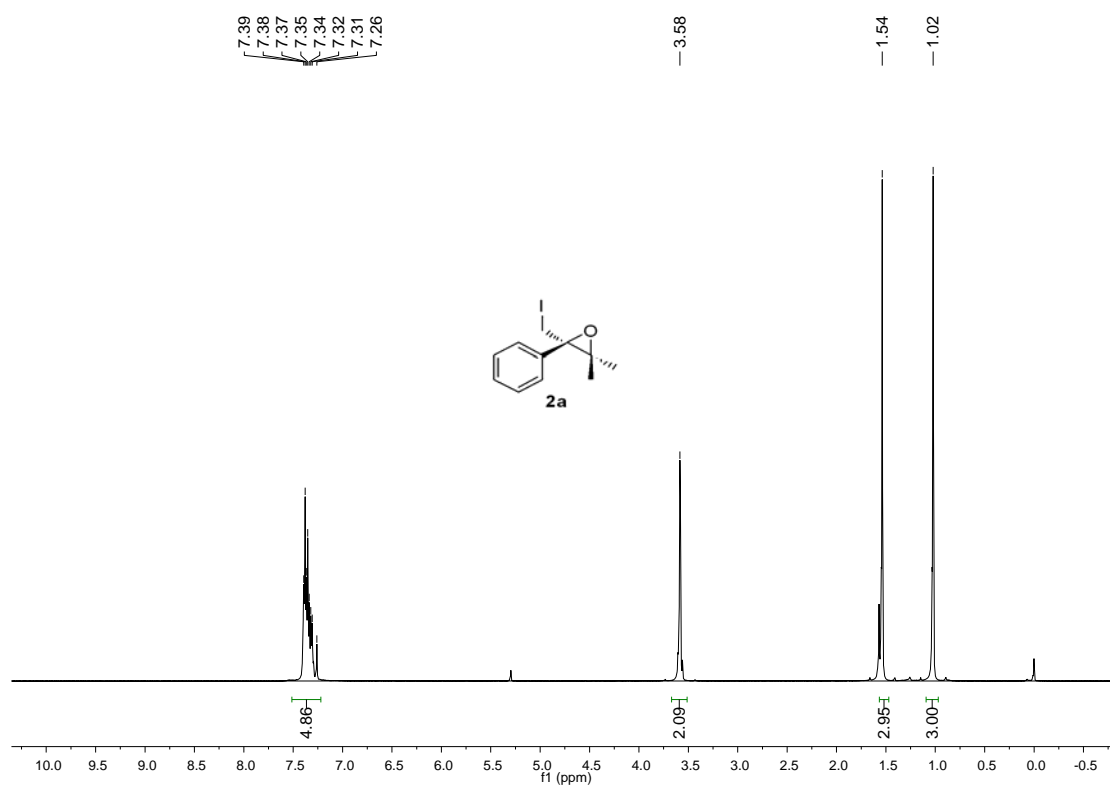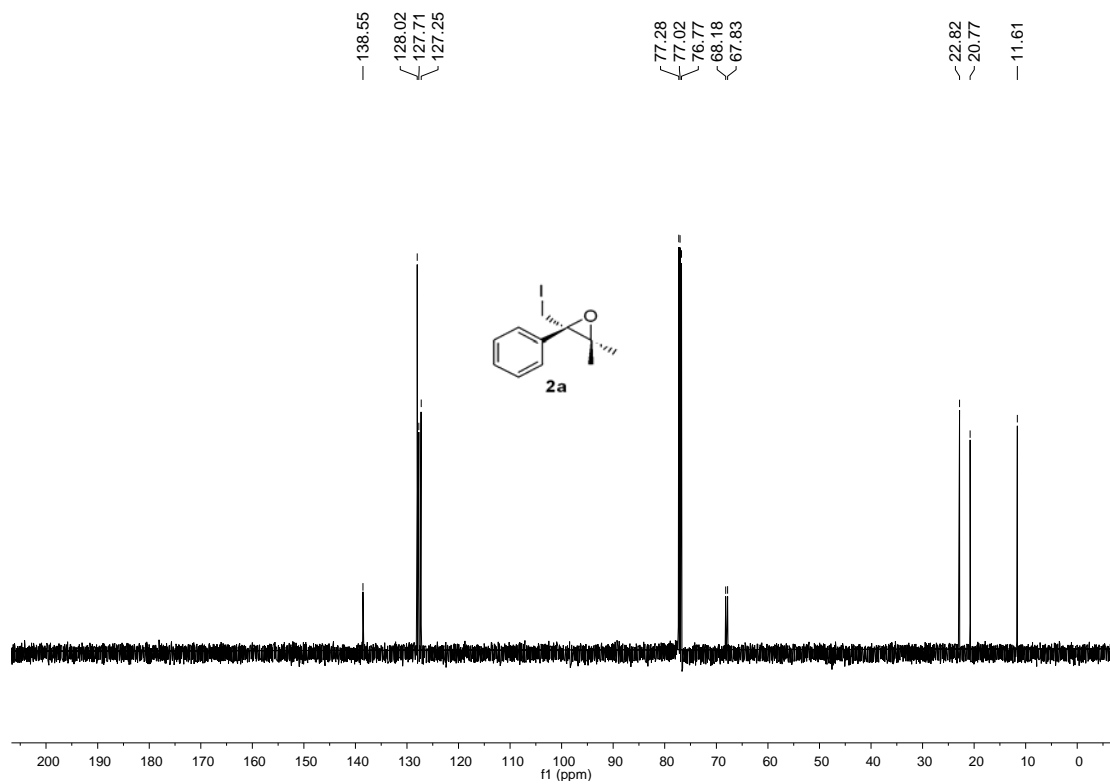

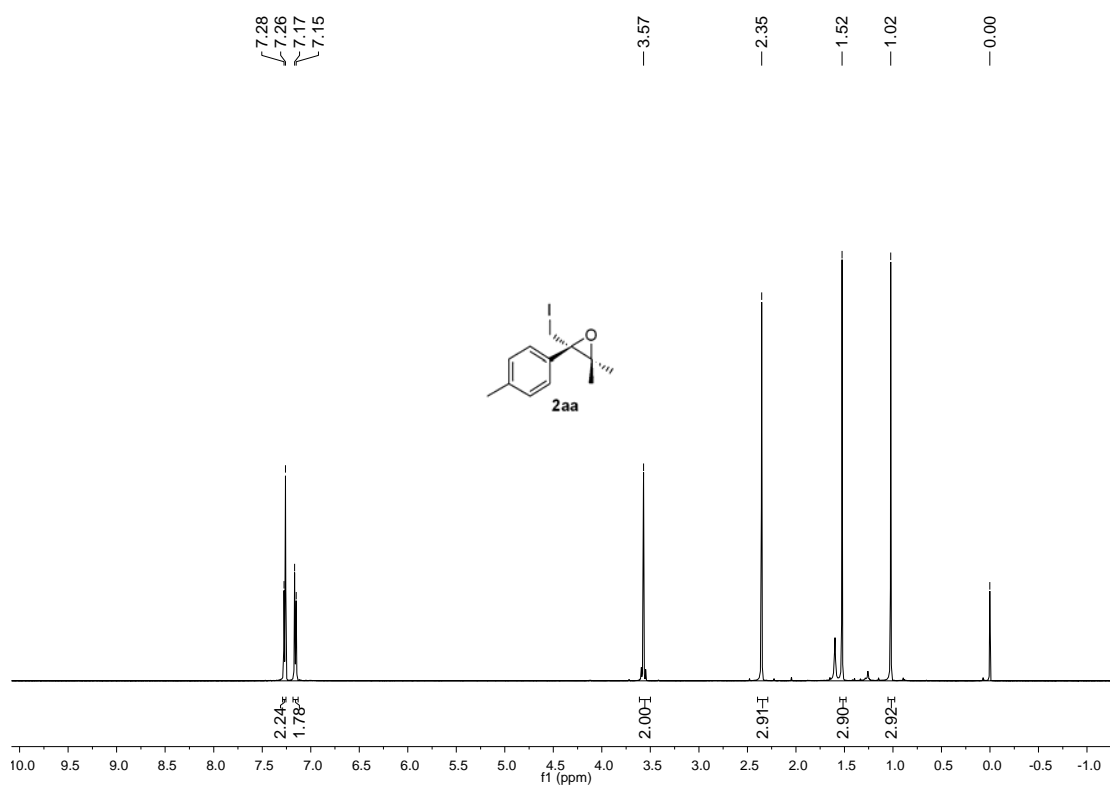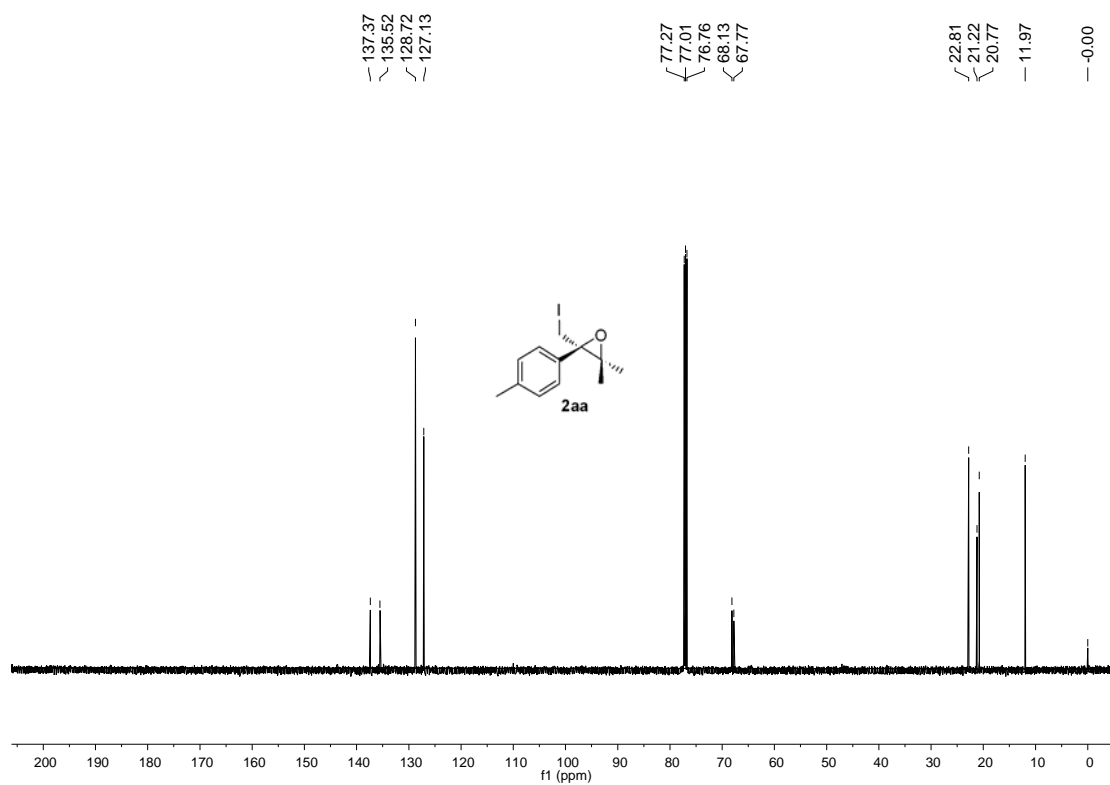

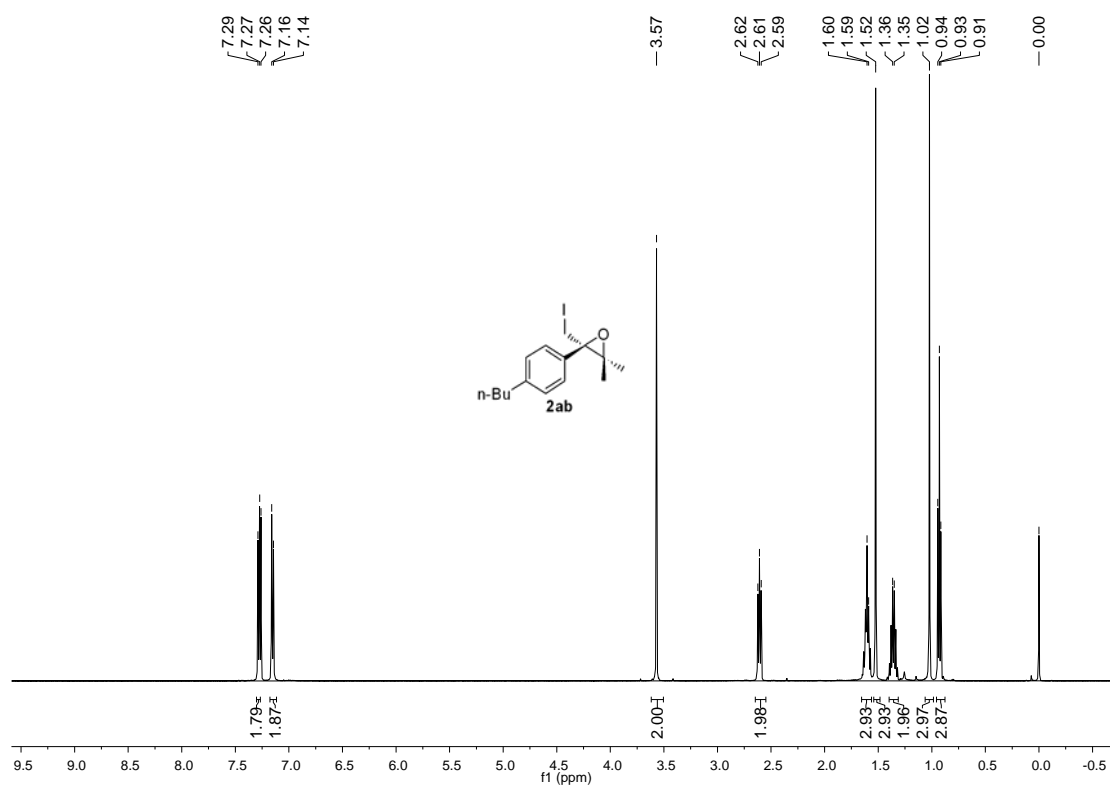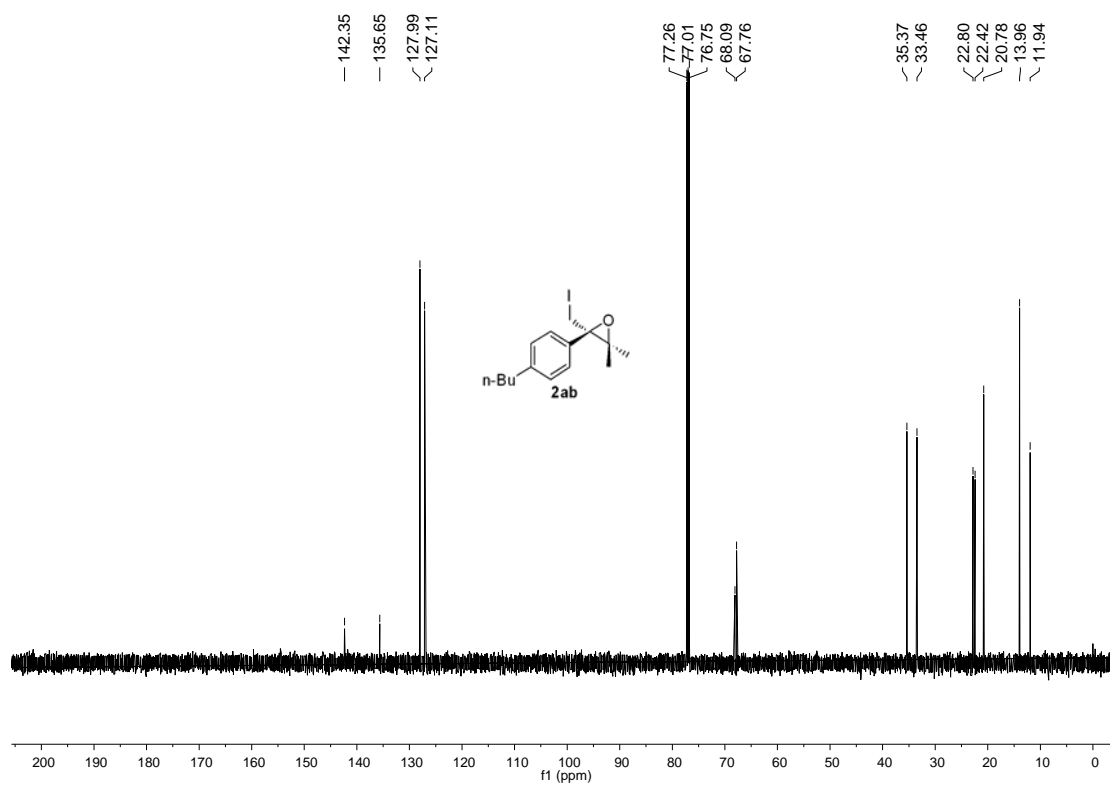

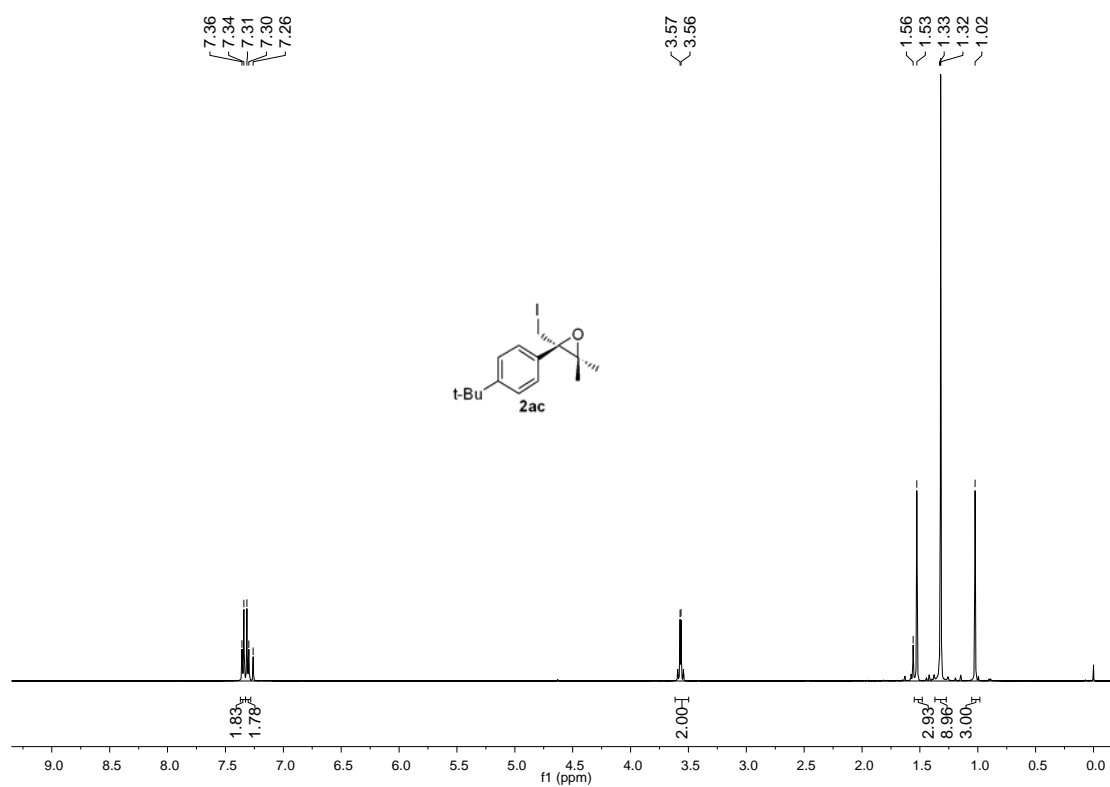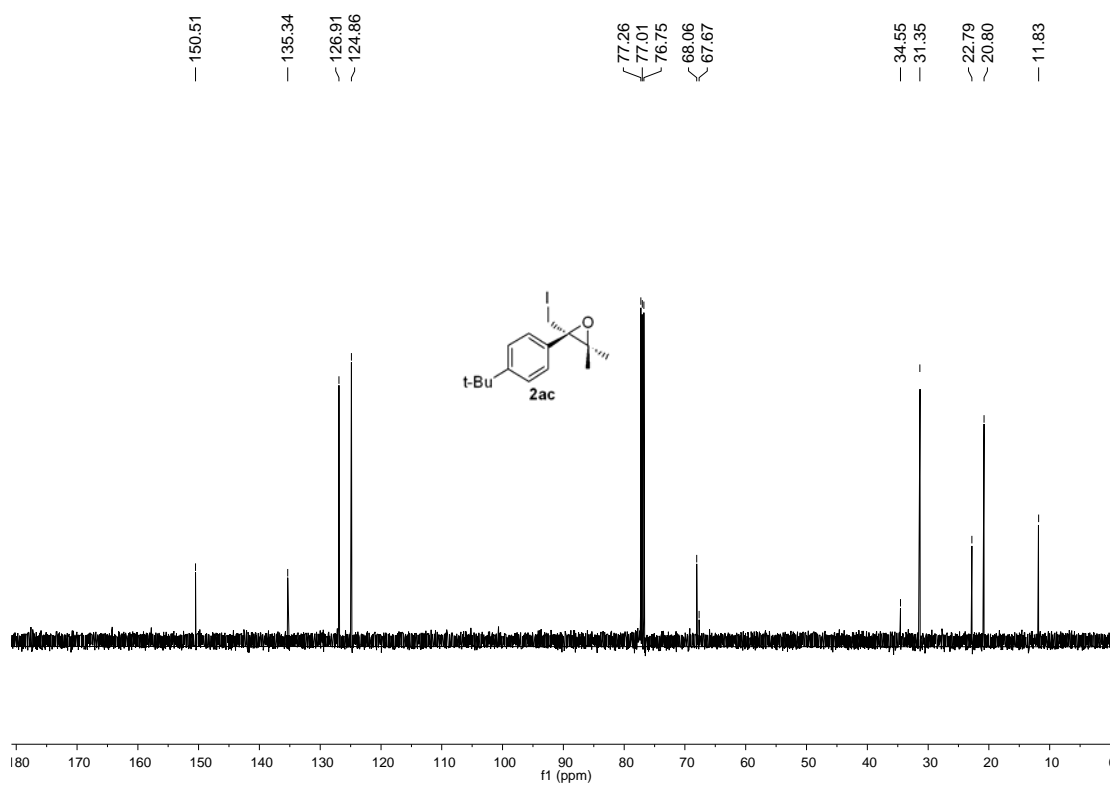

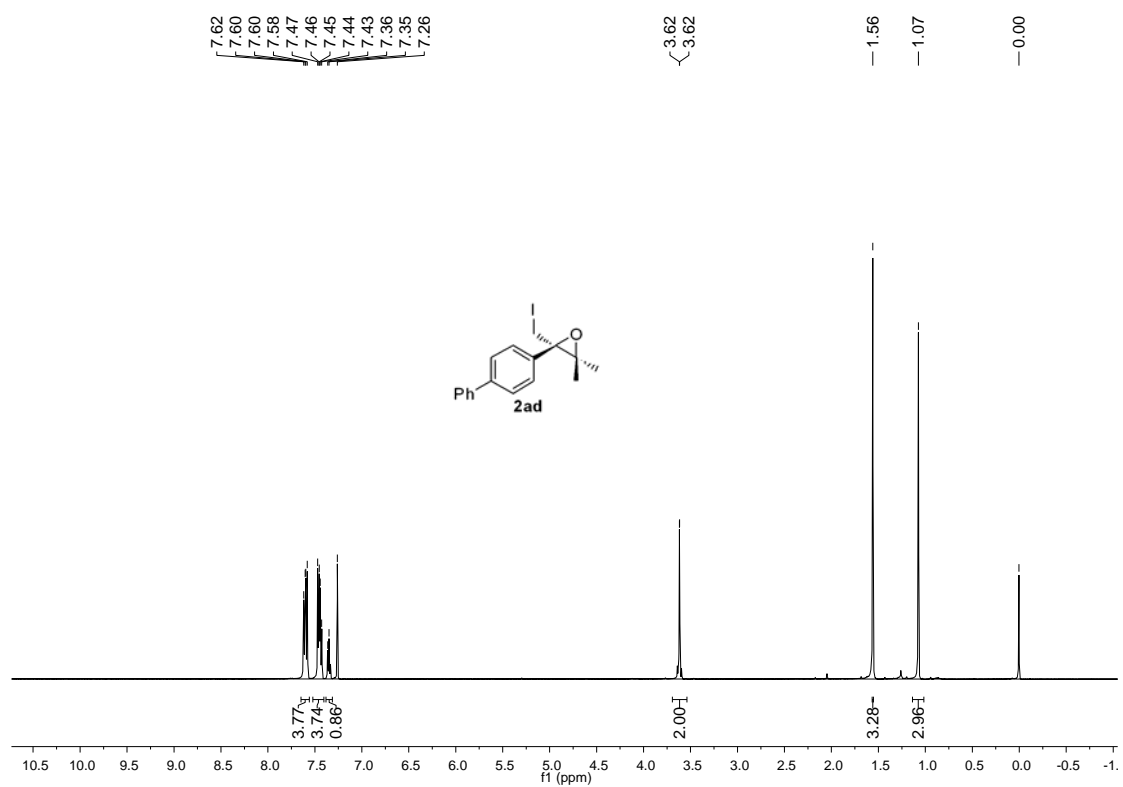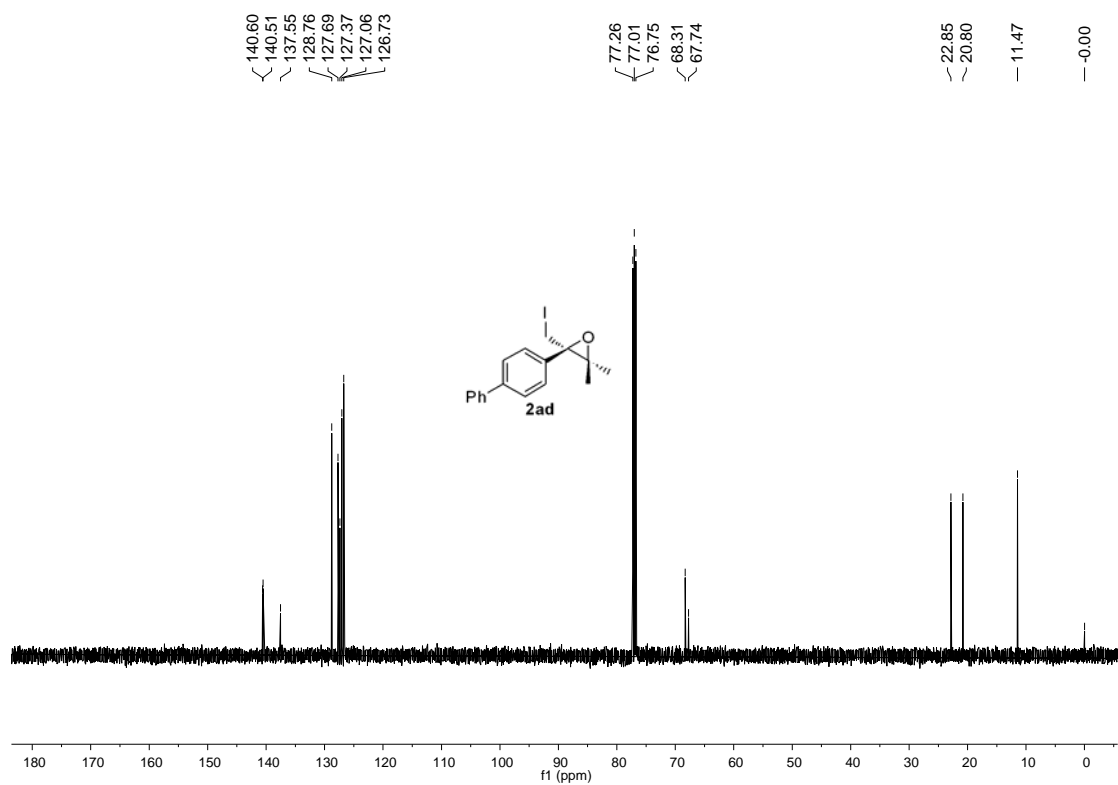

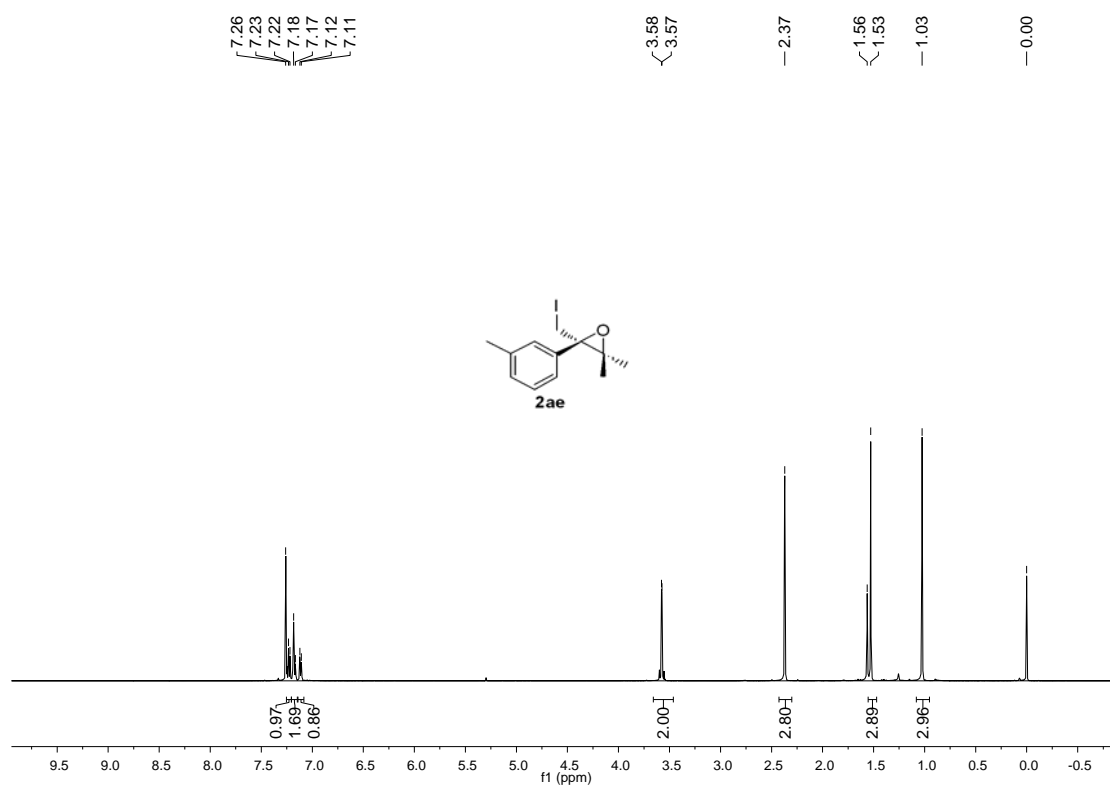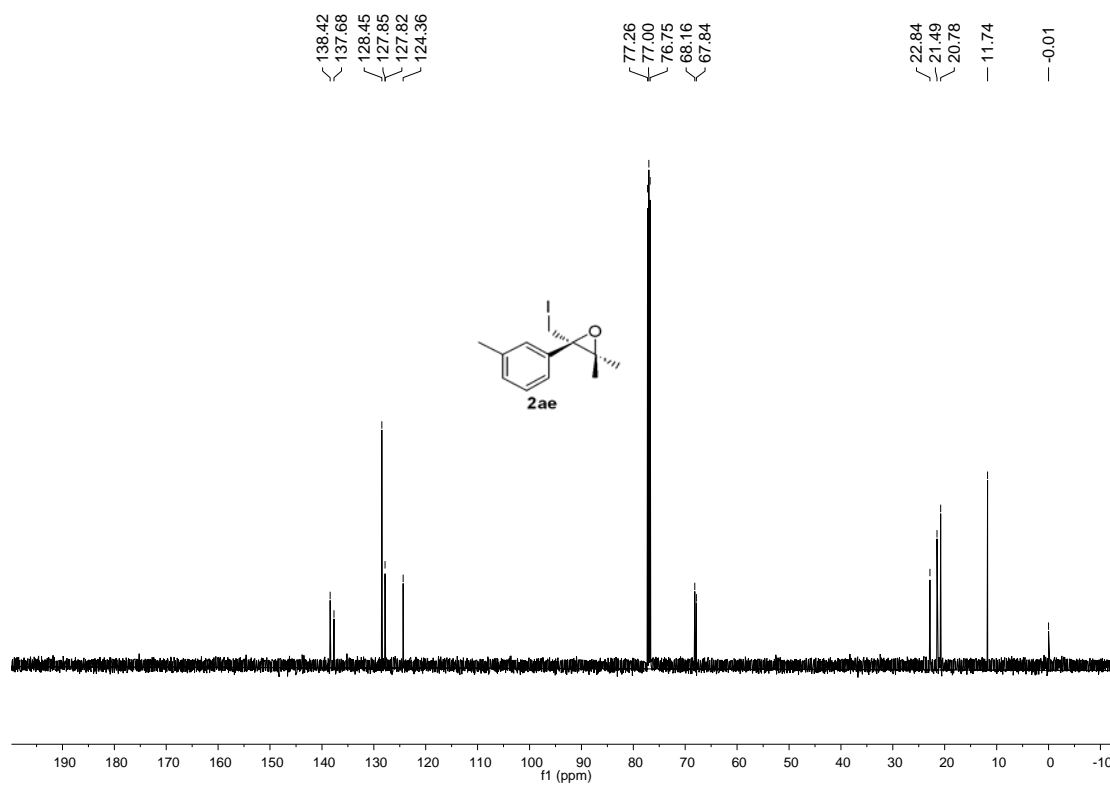

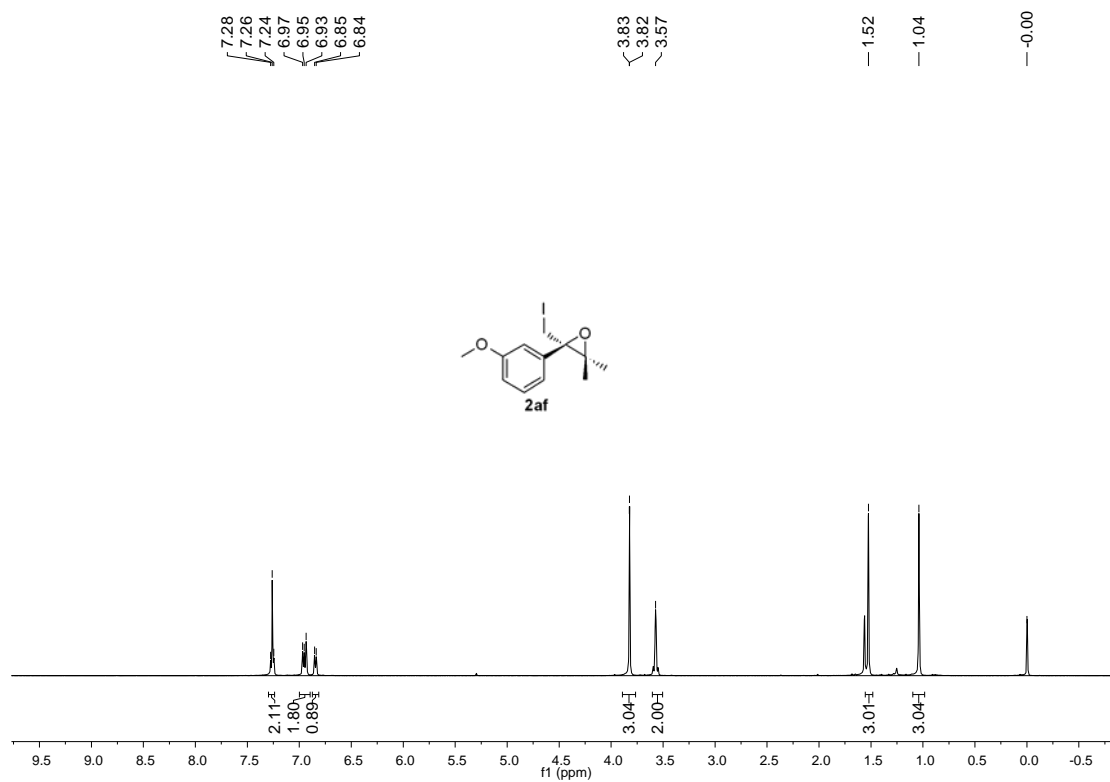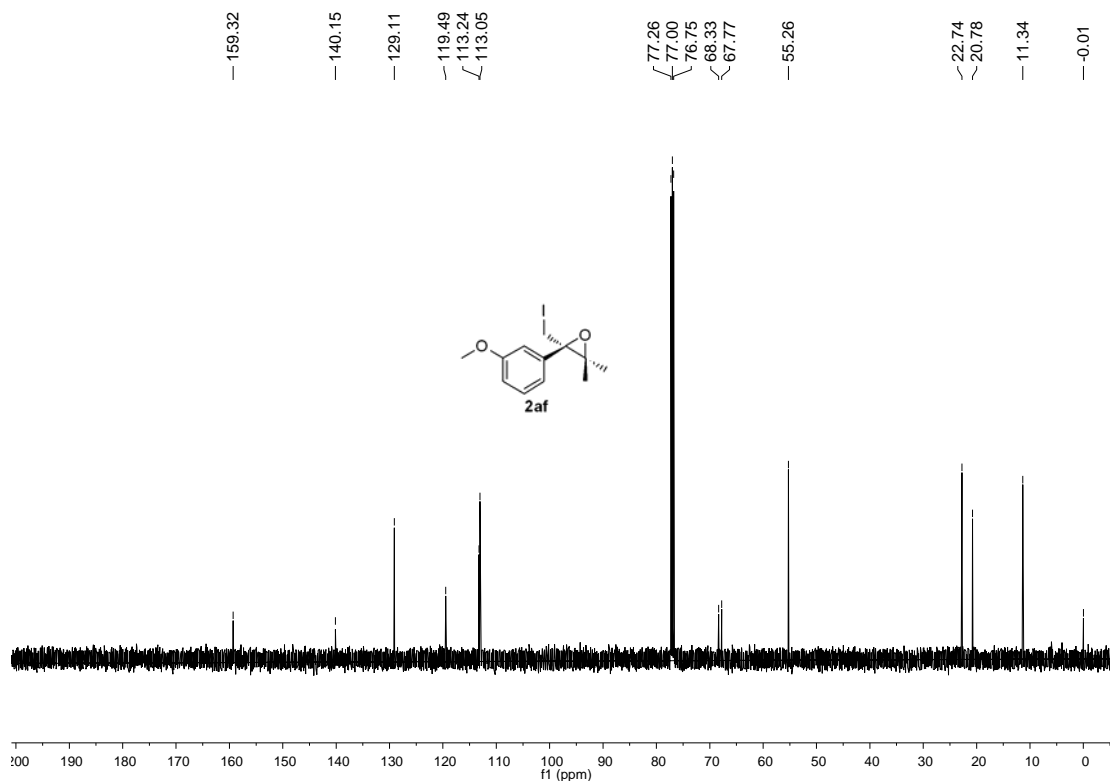

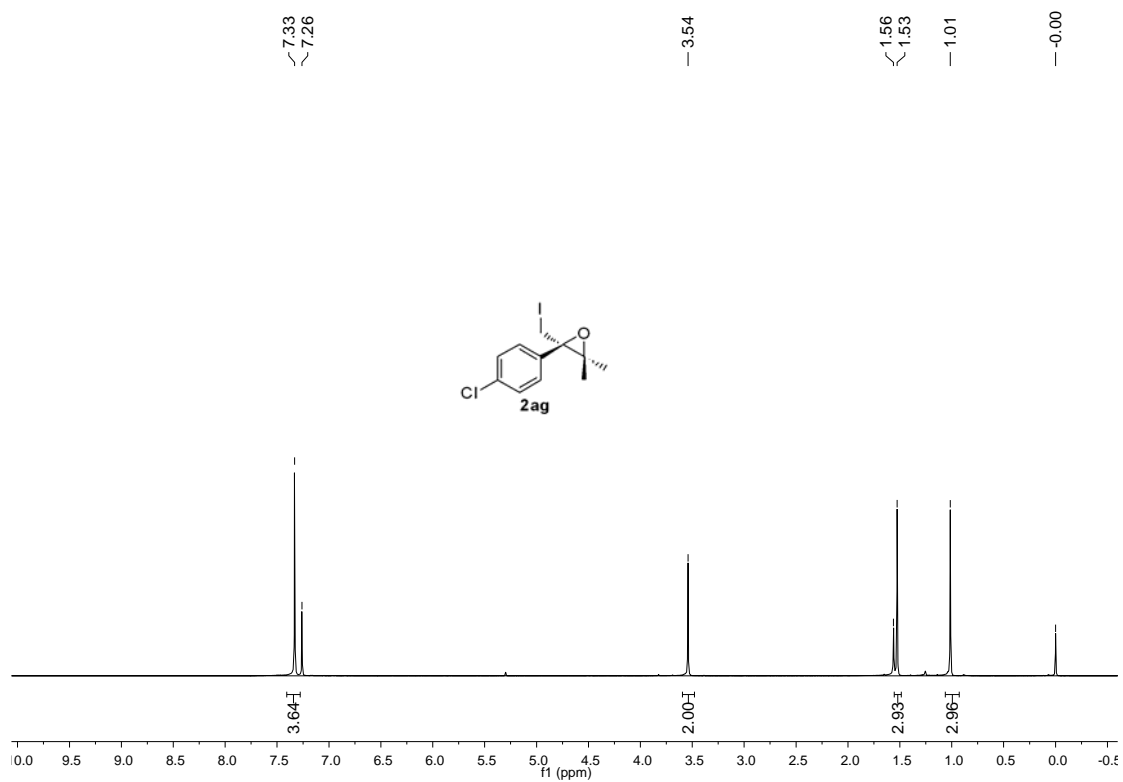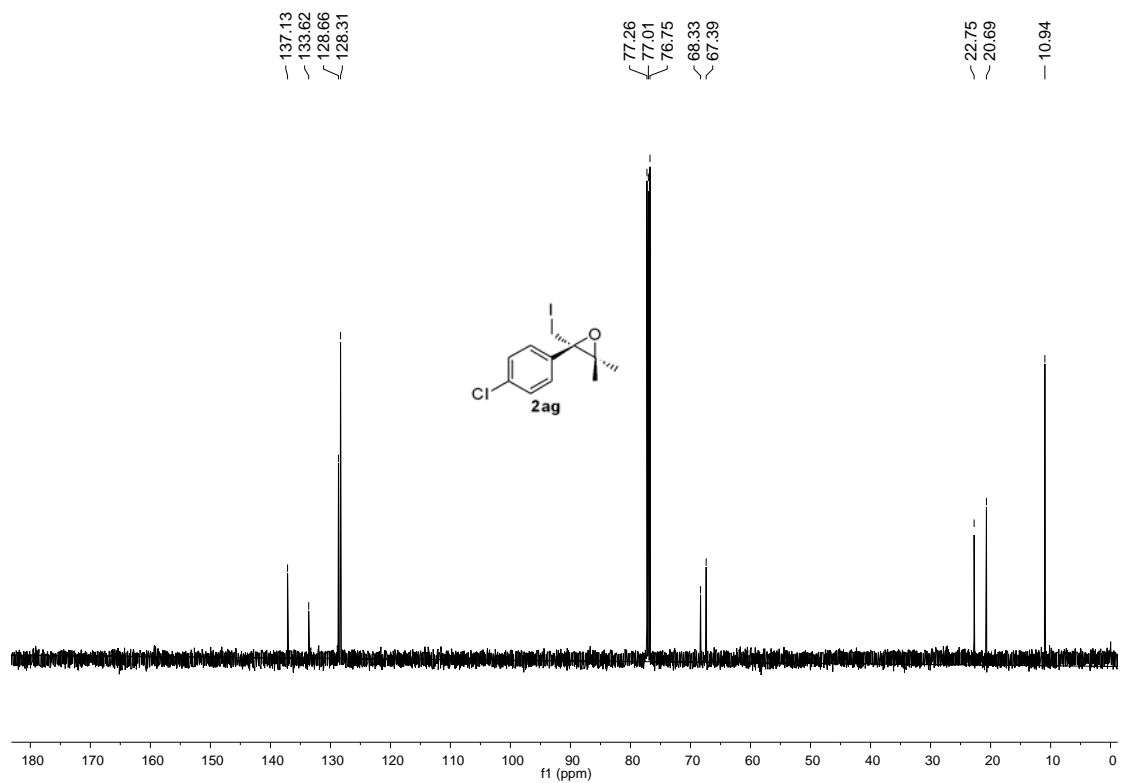



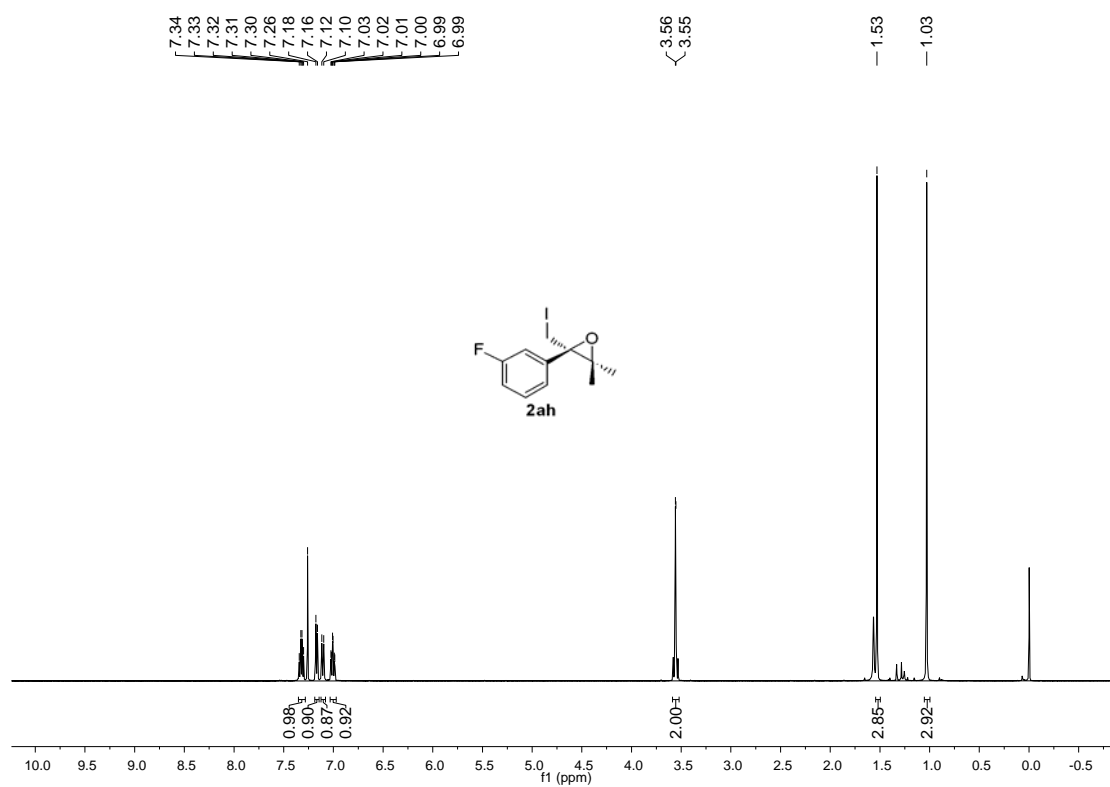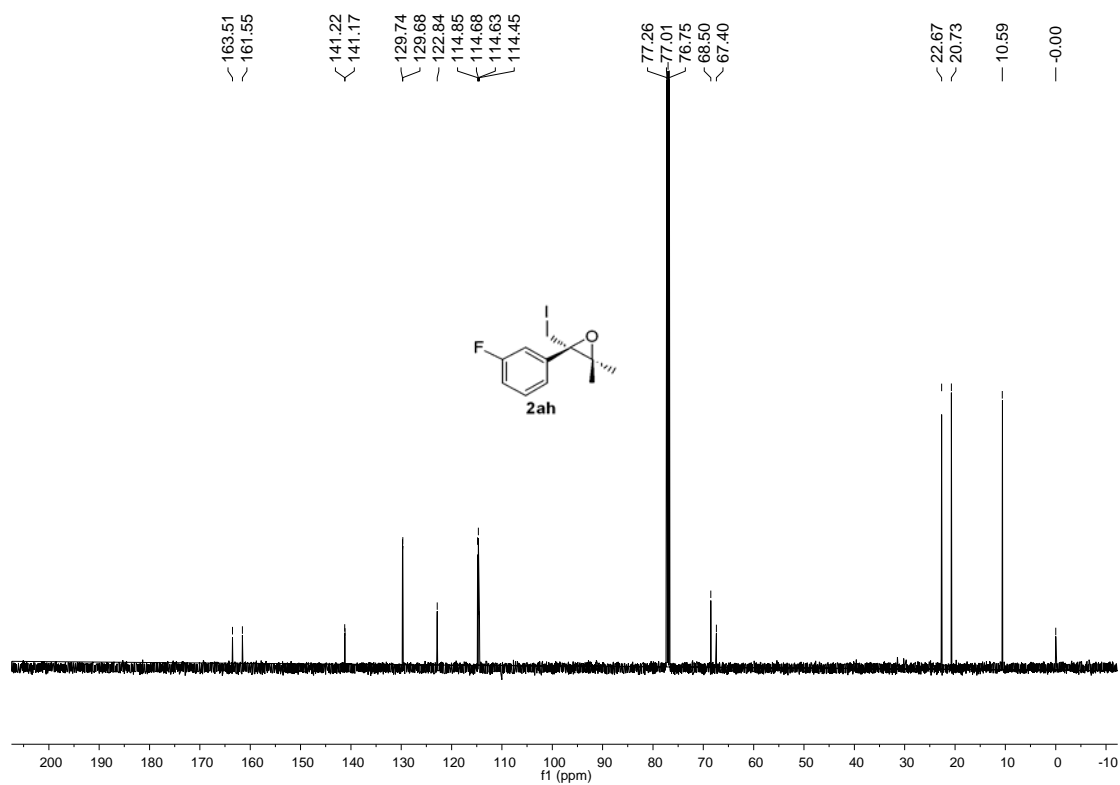

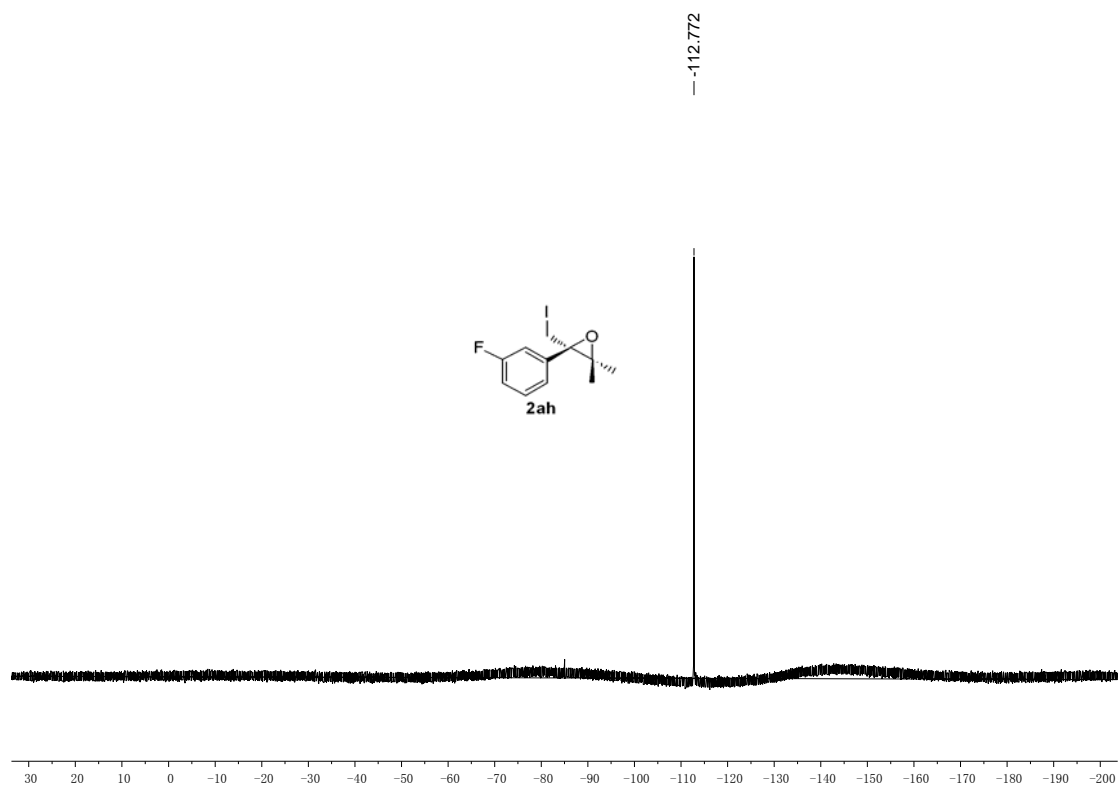

j

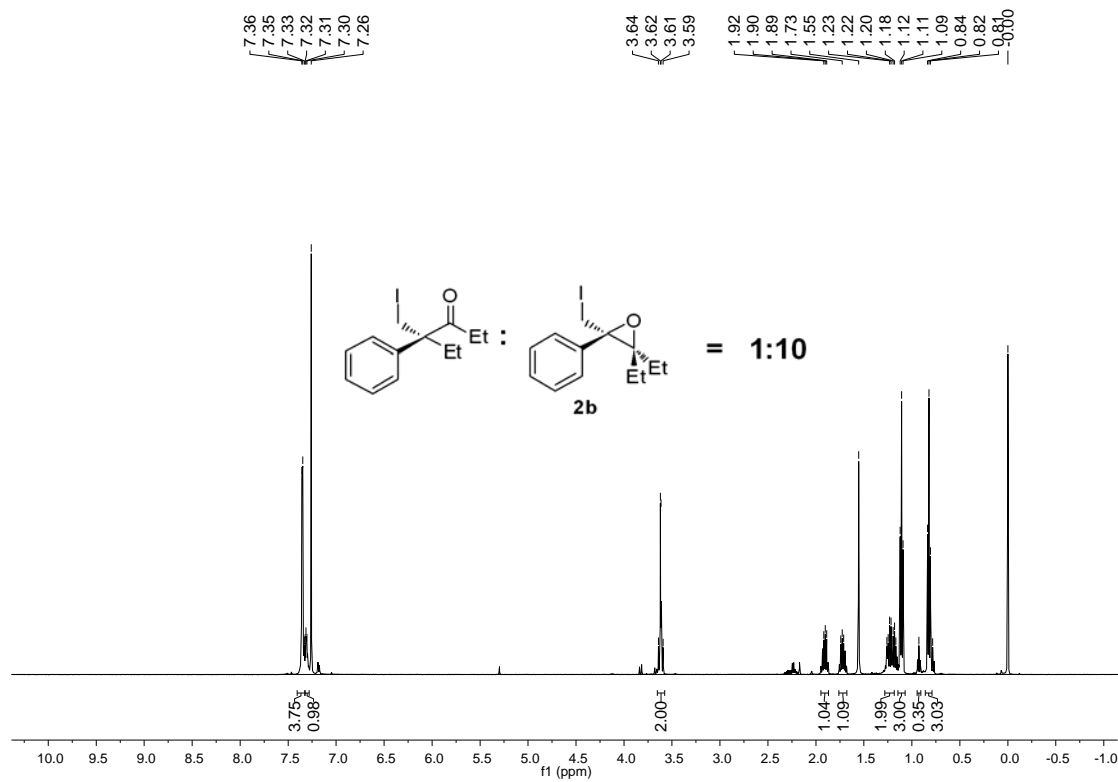

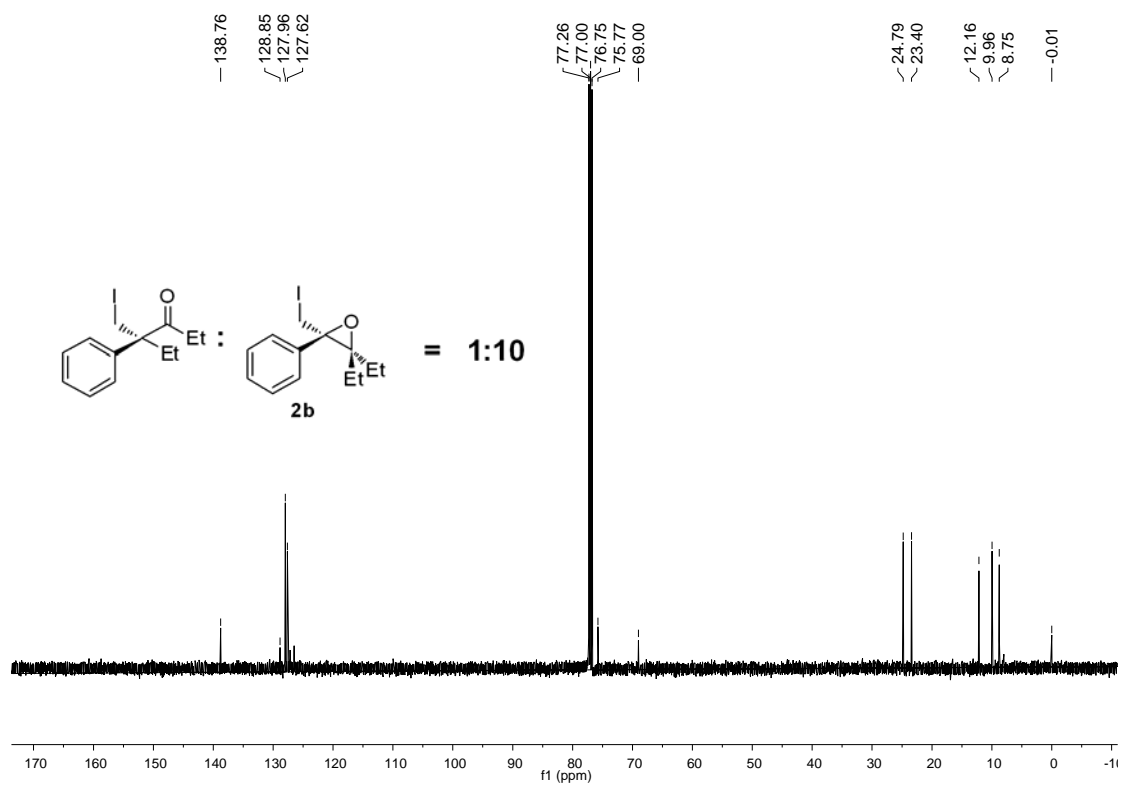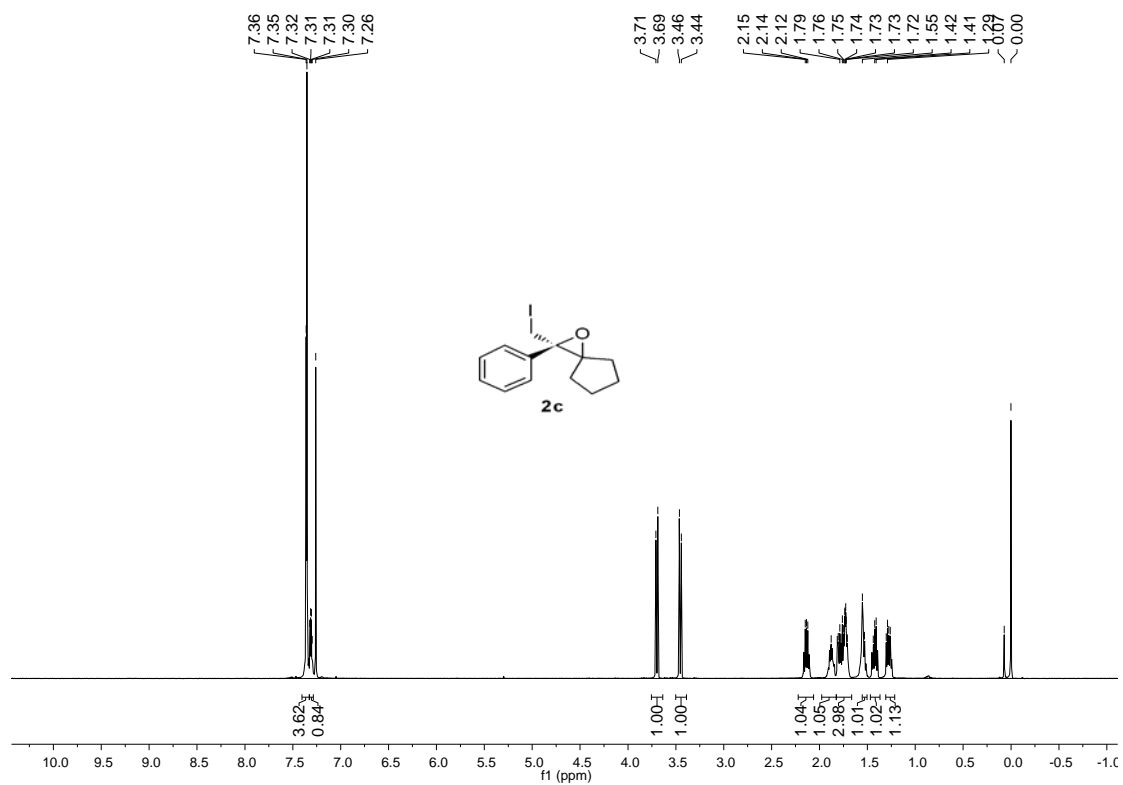

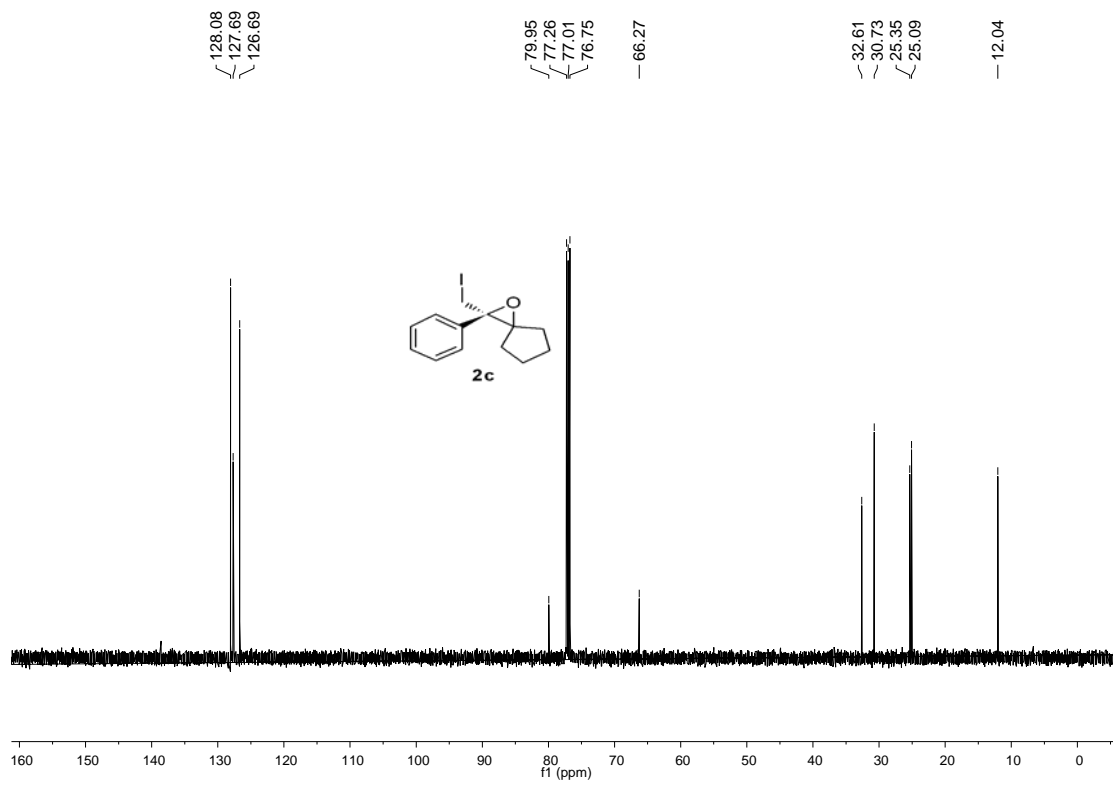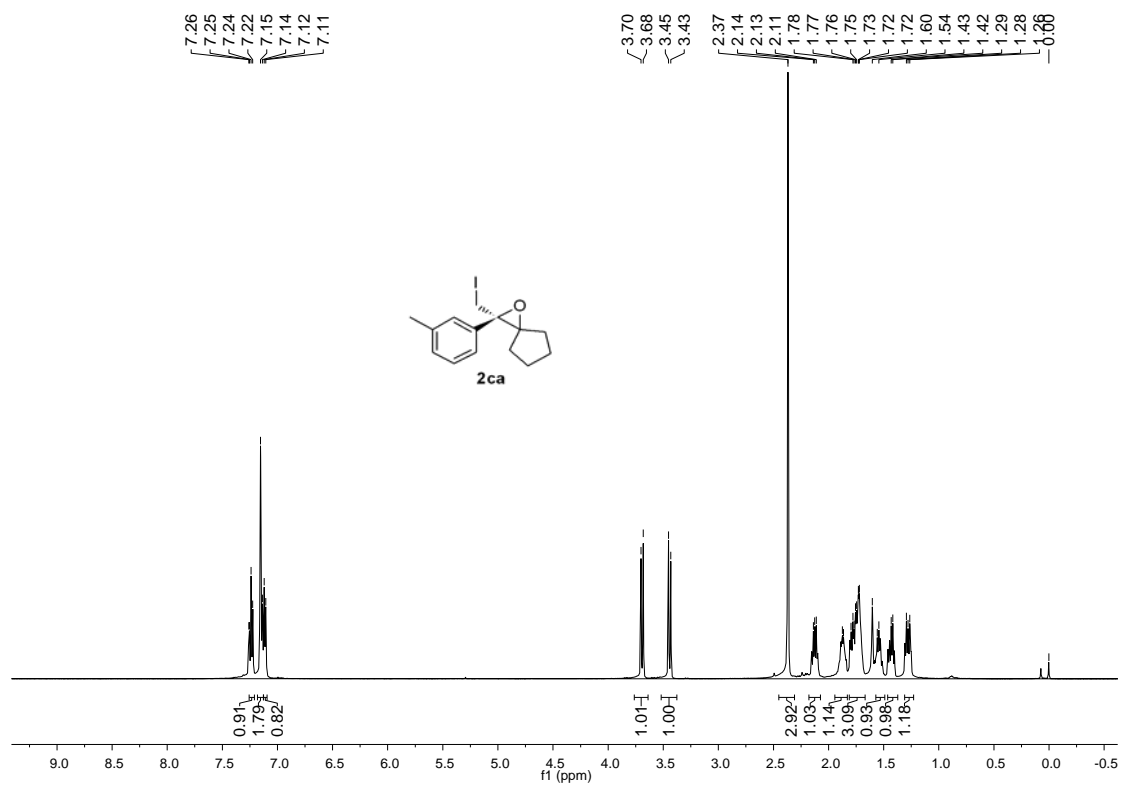

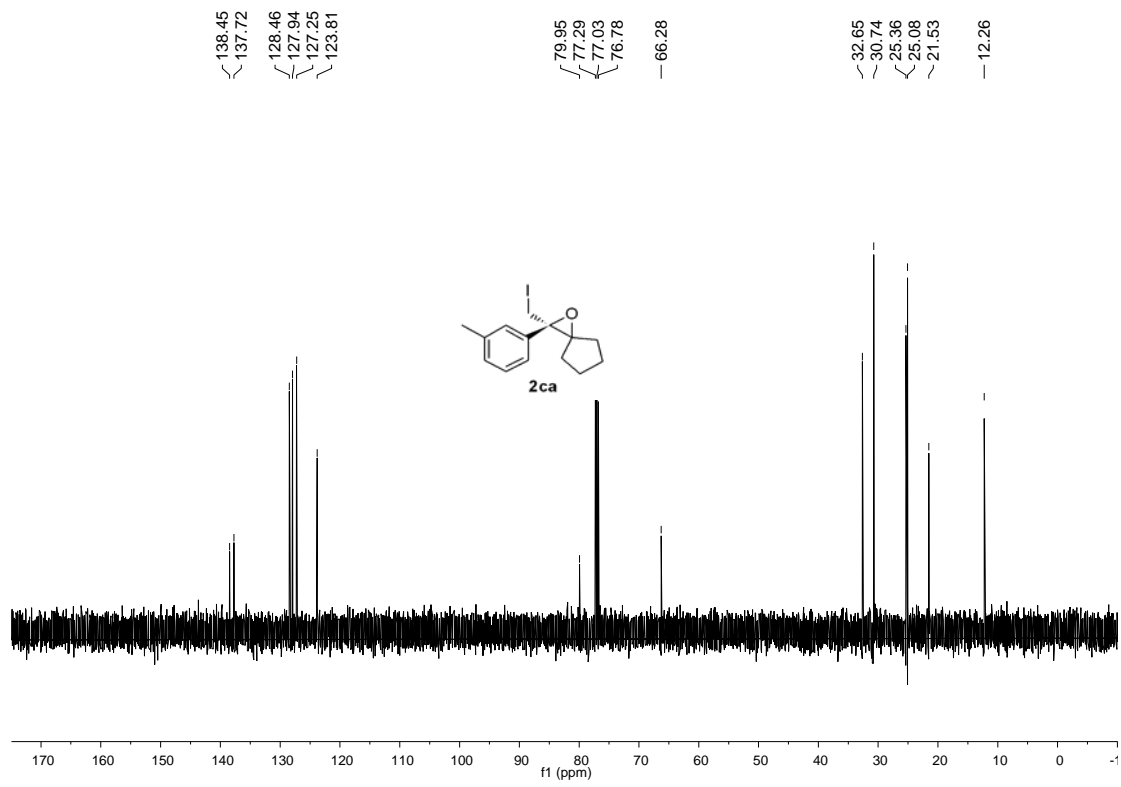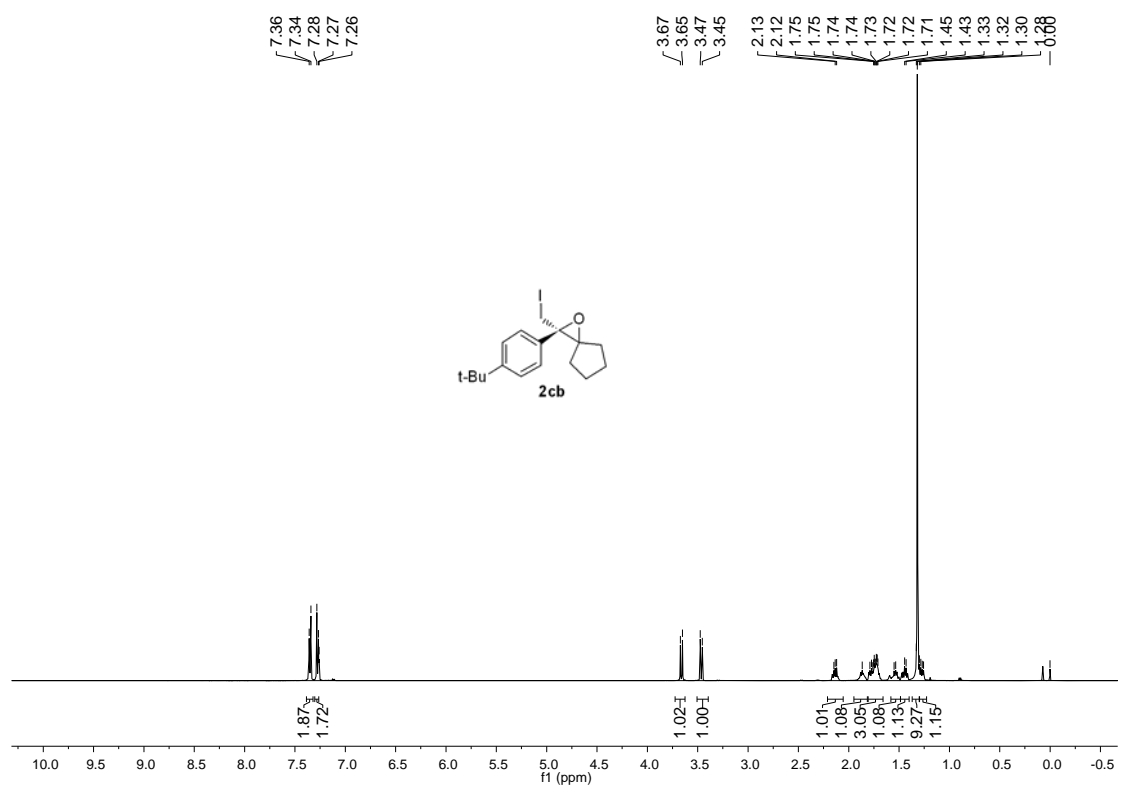

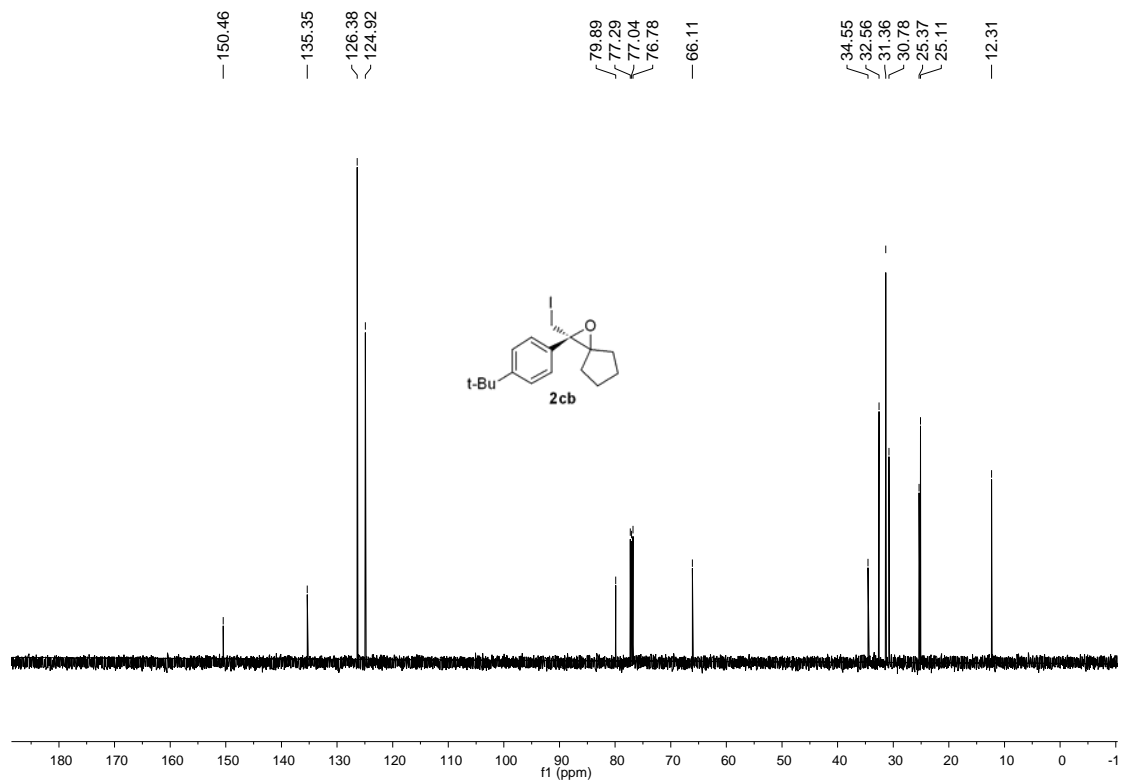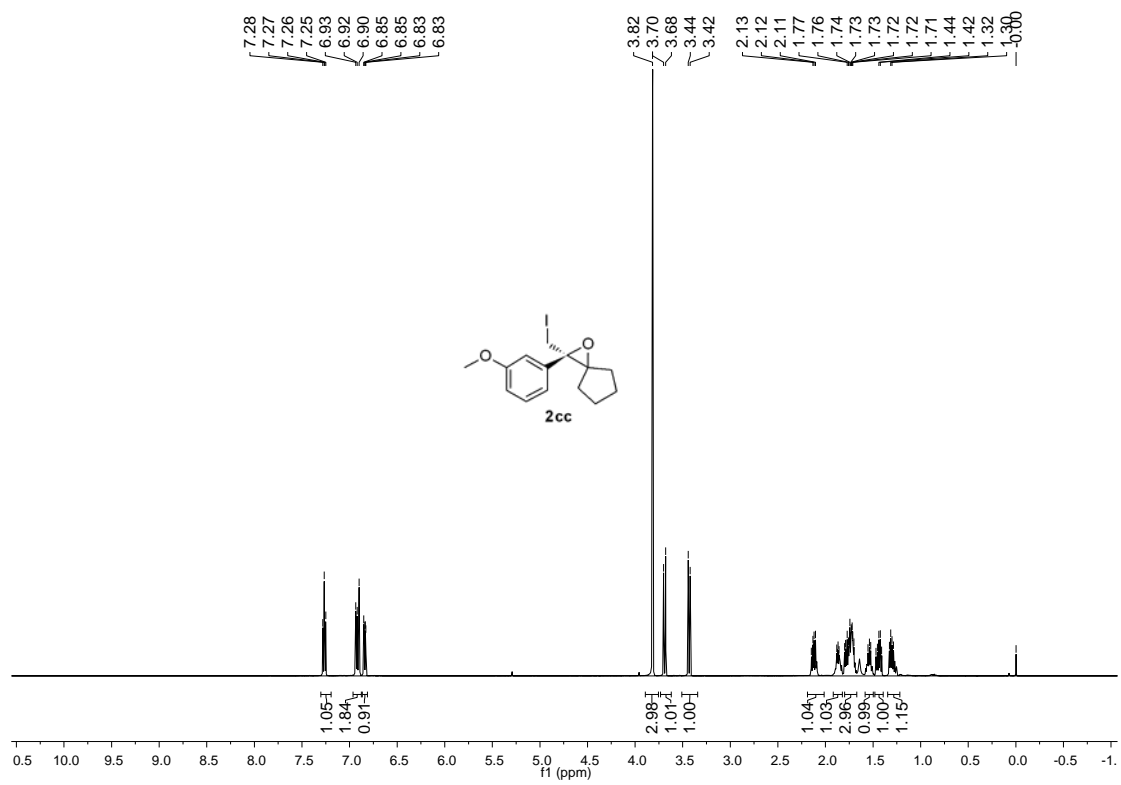

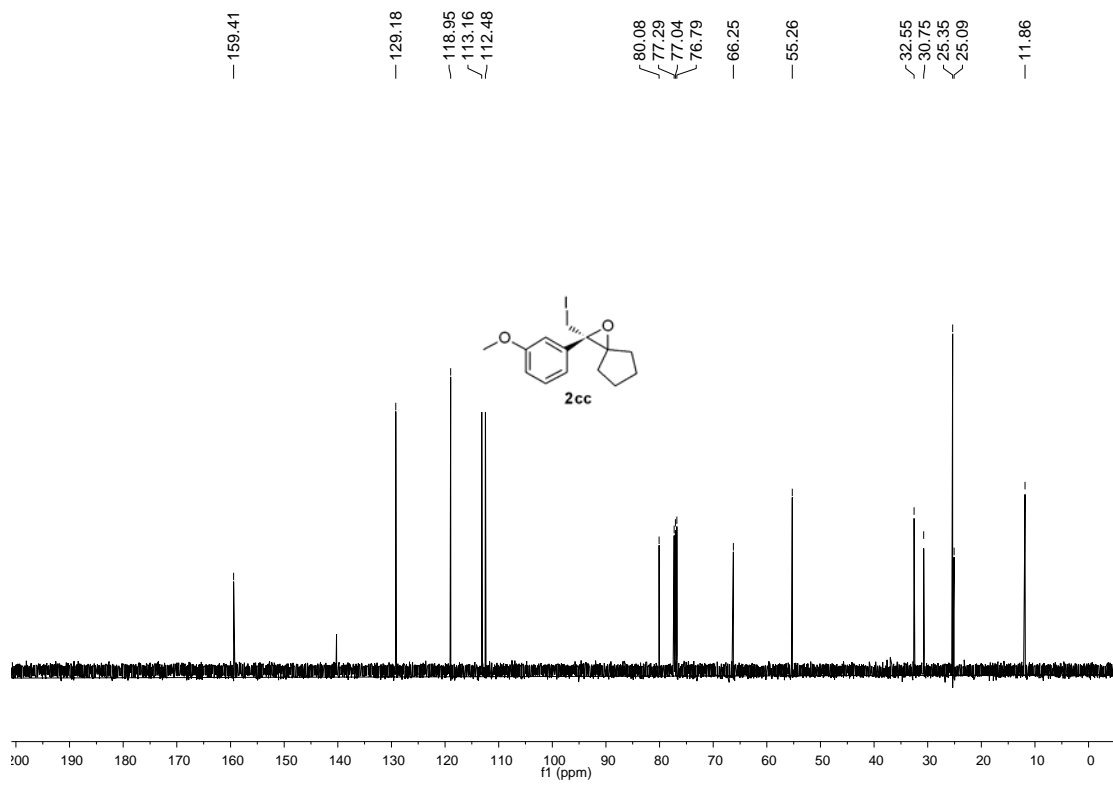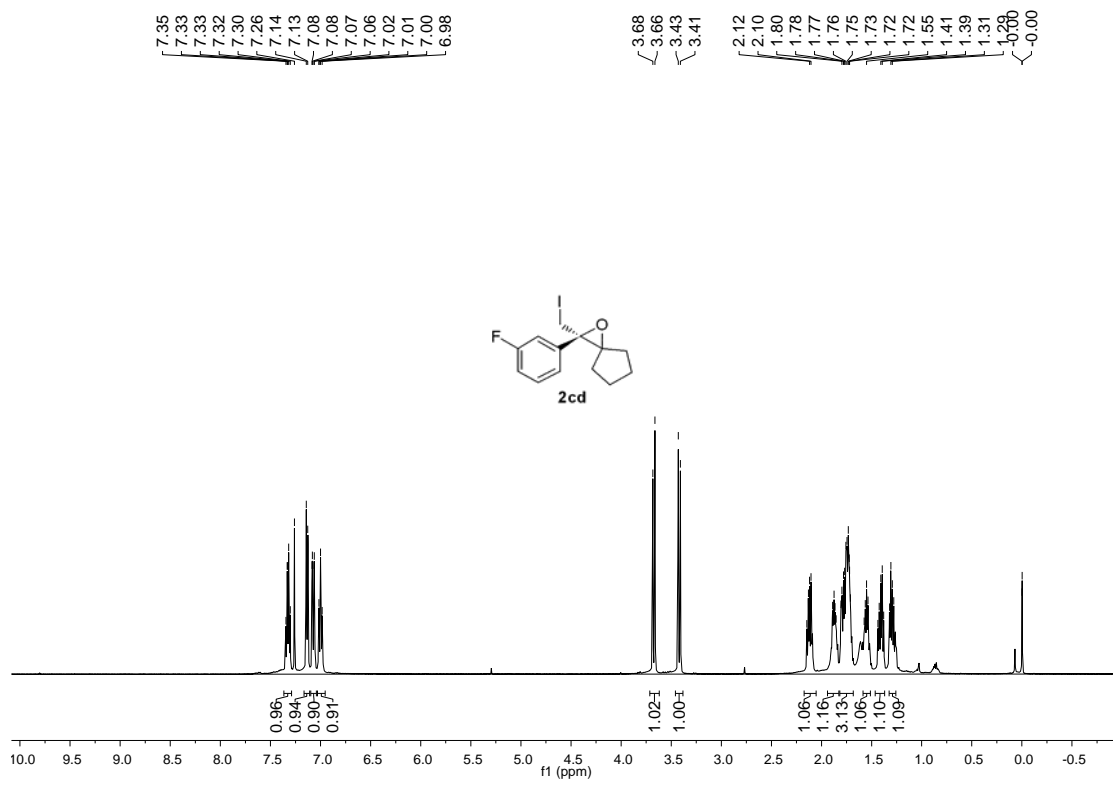

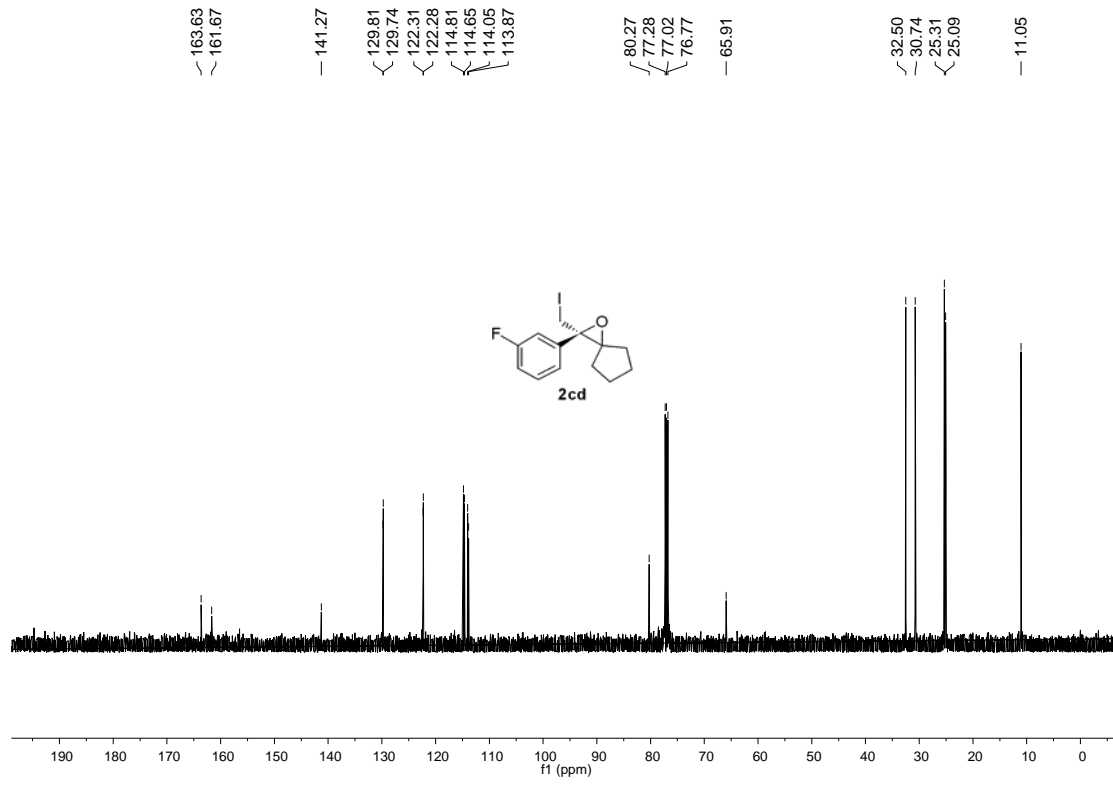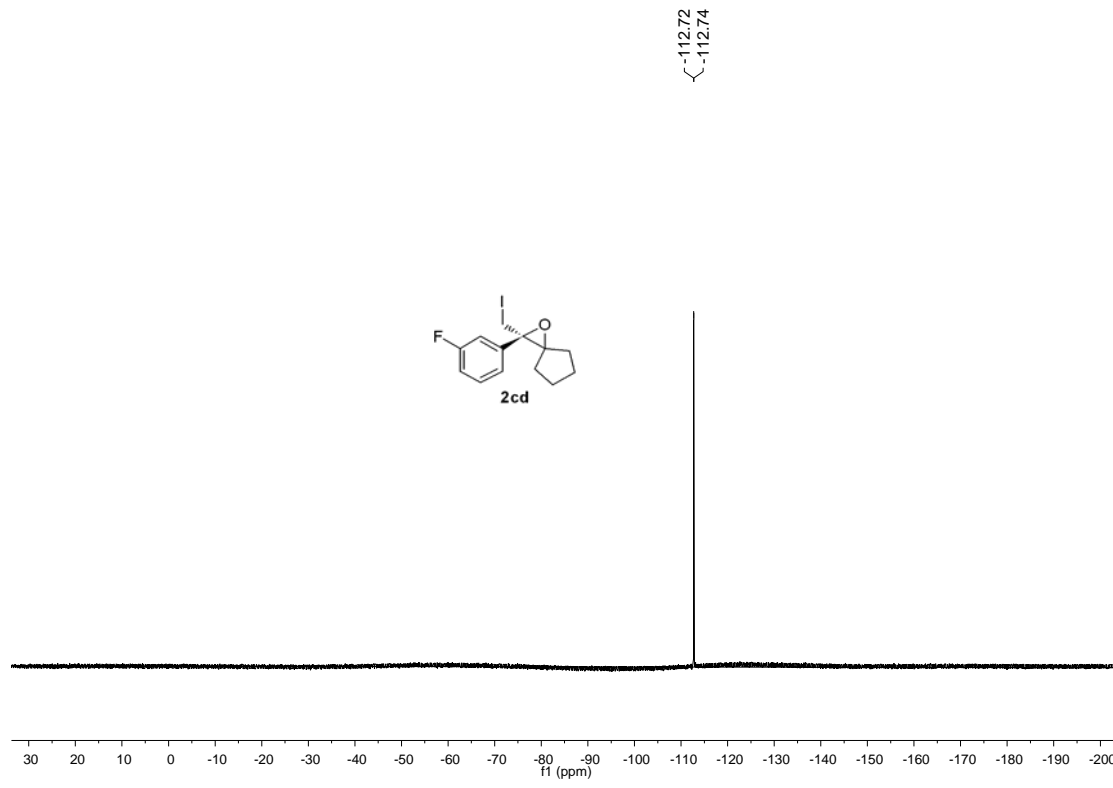



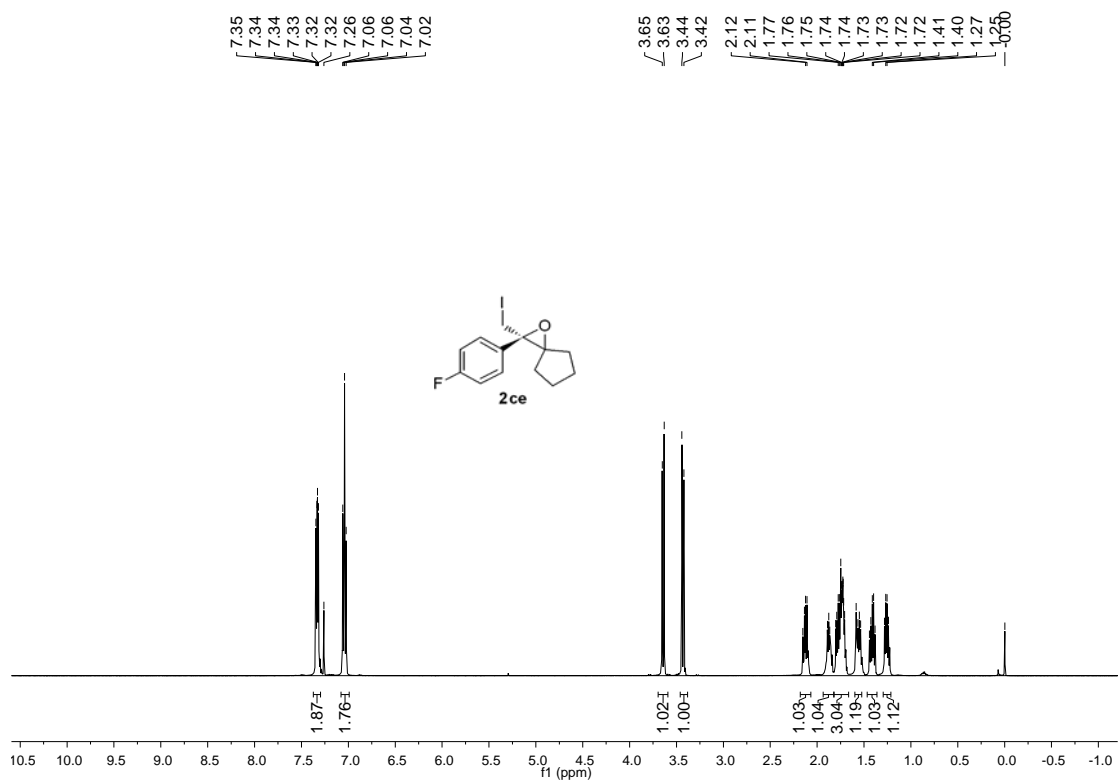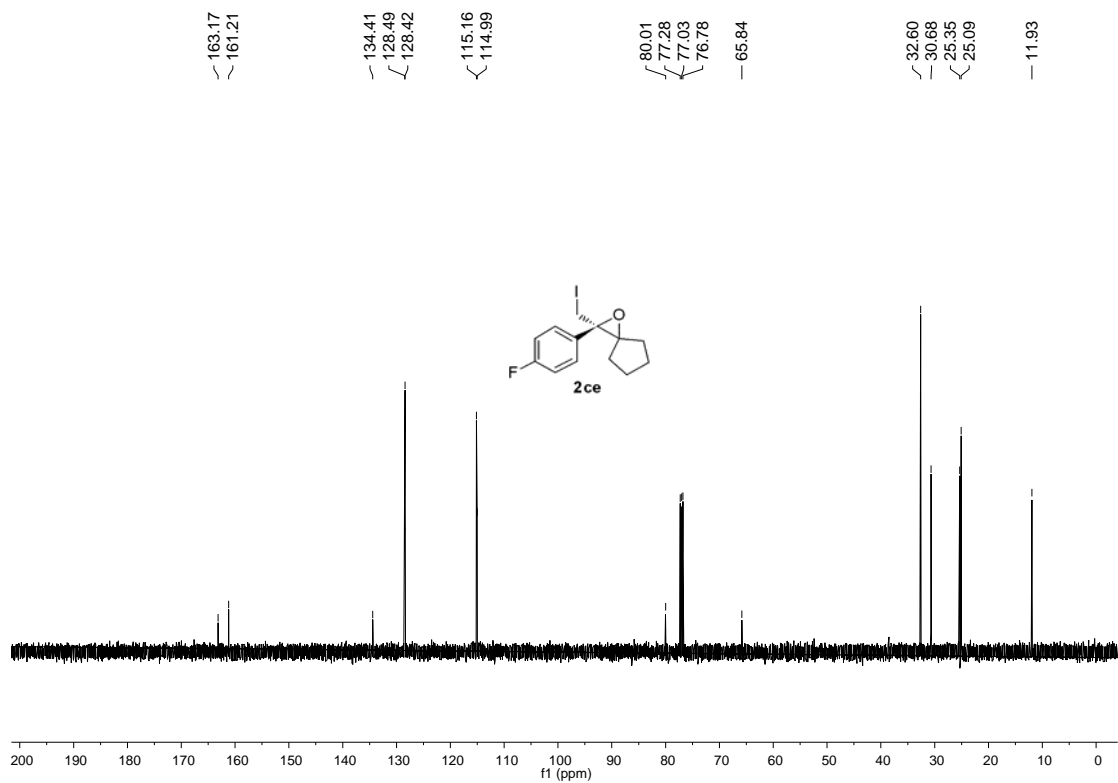

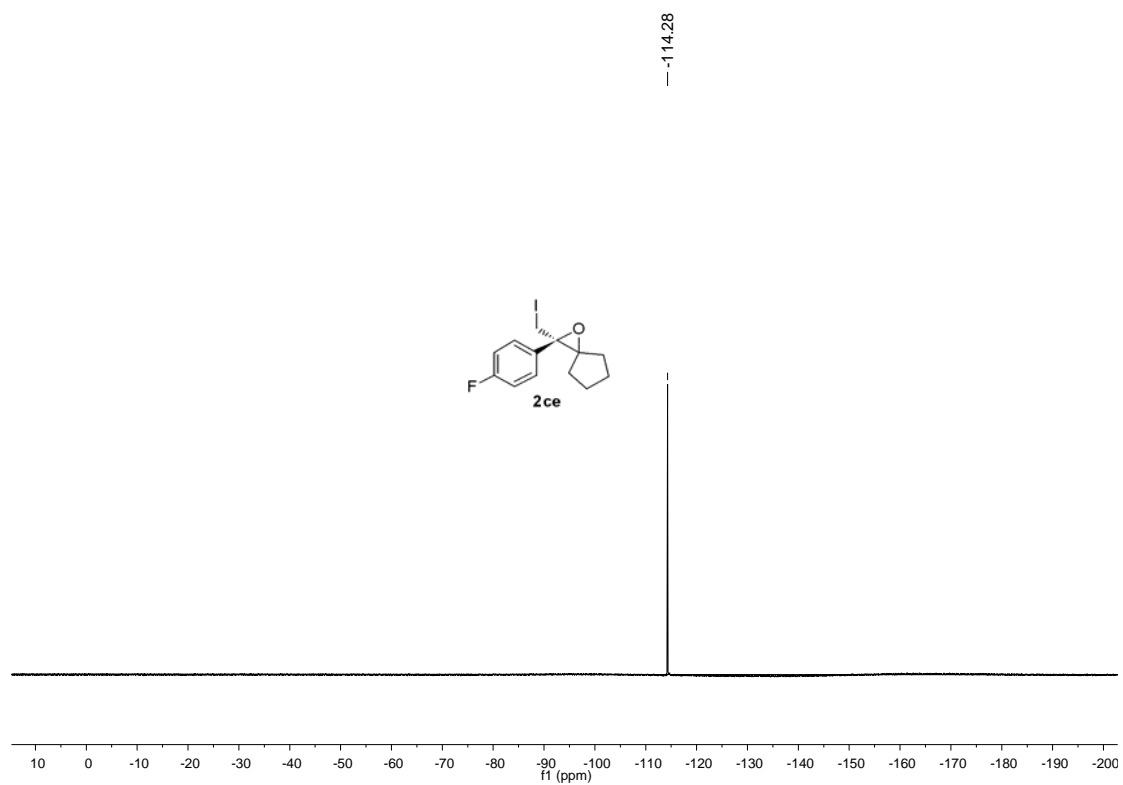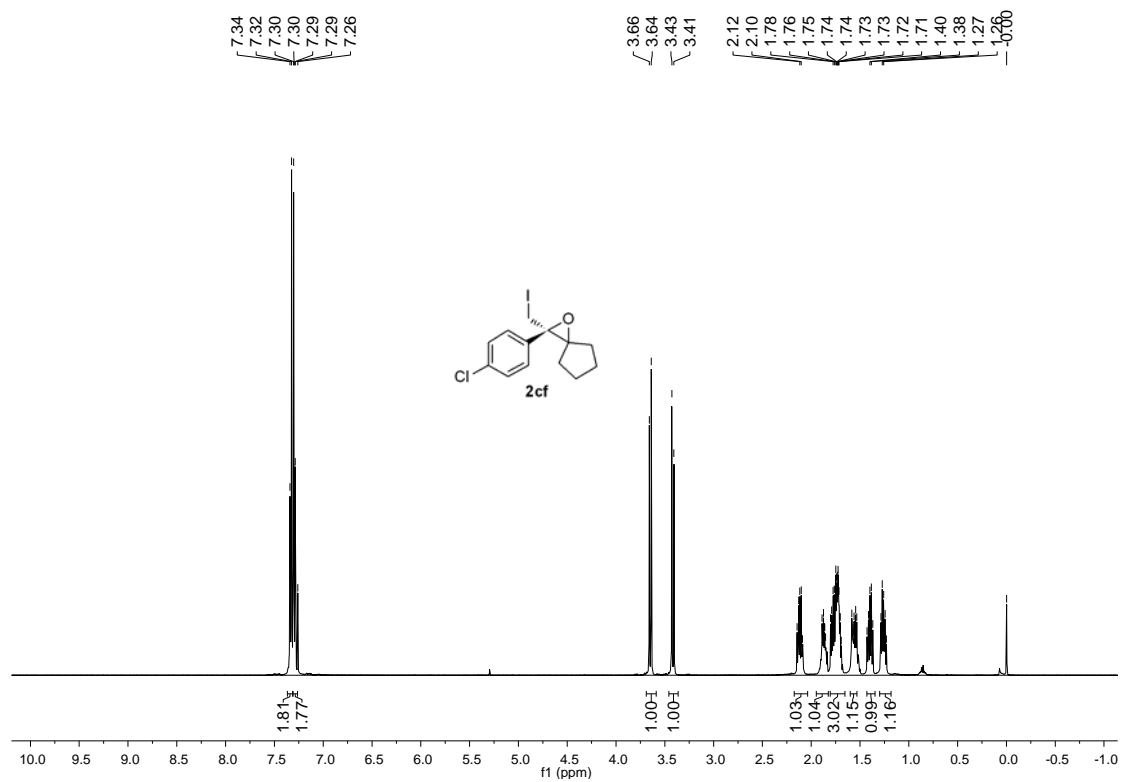

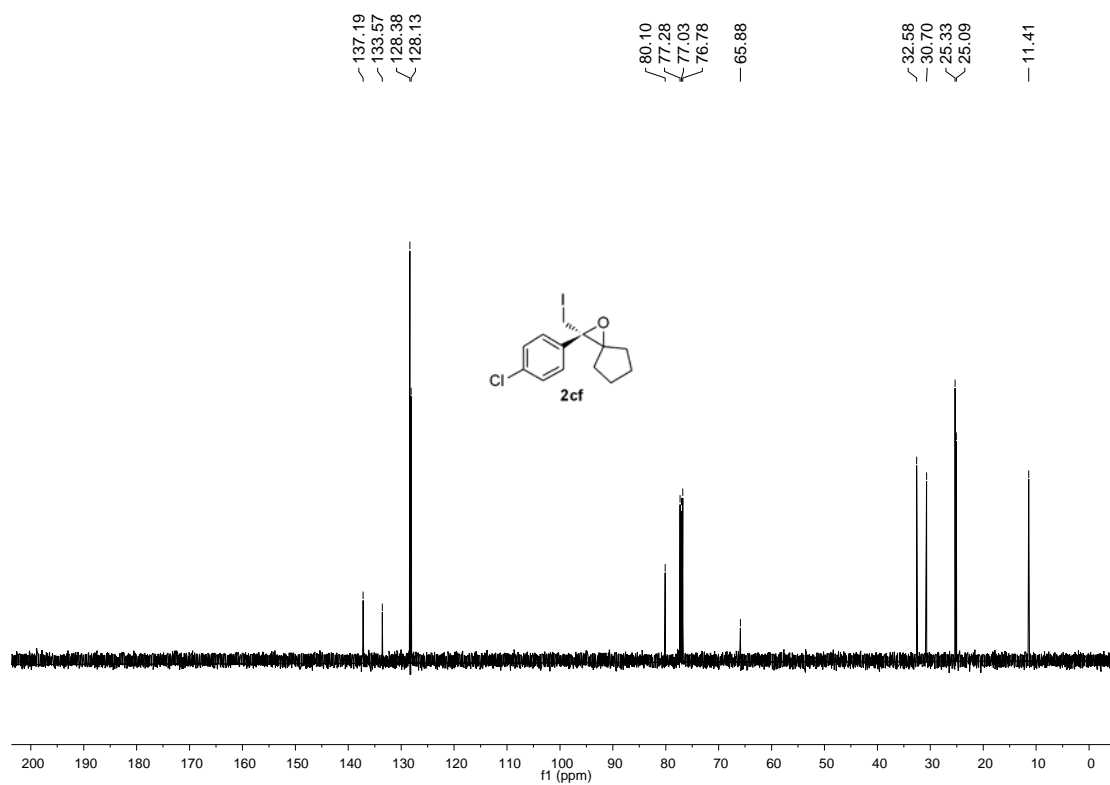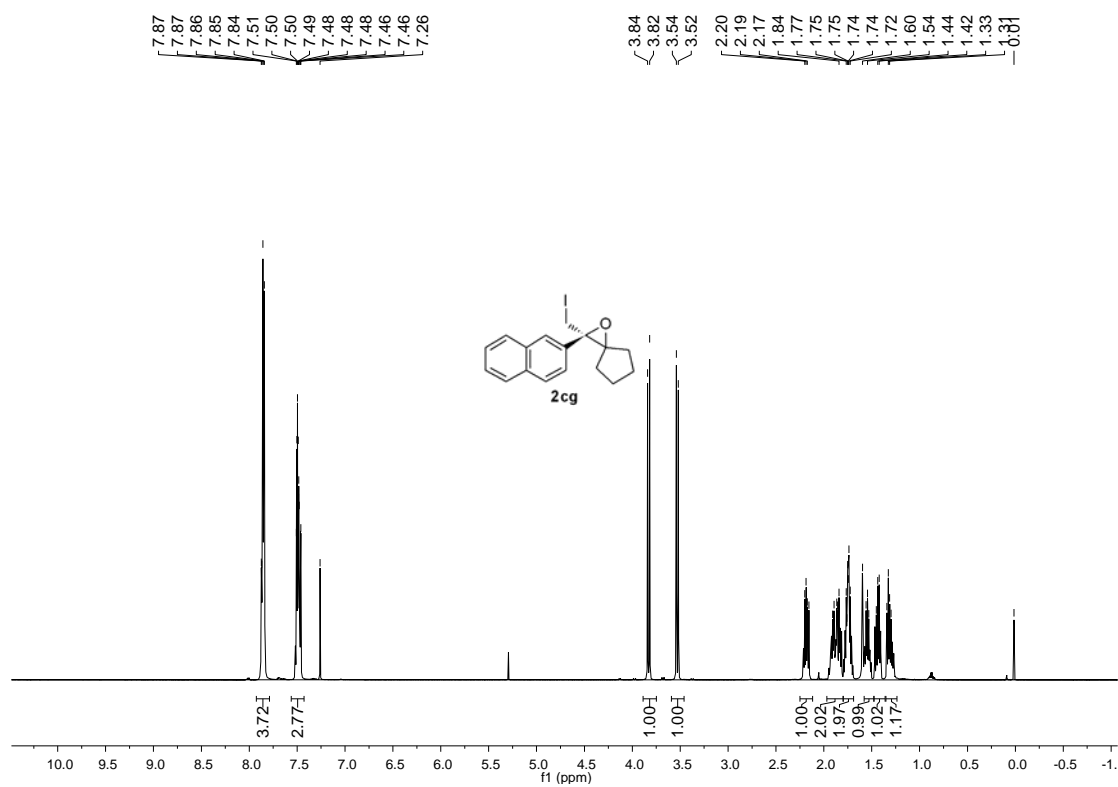

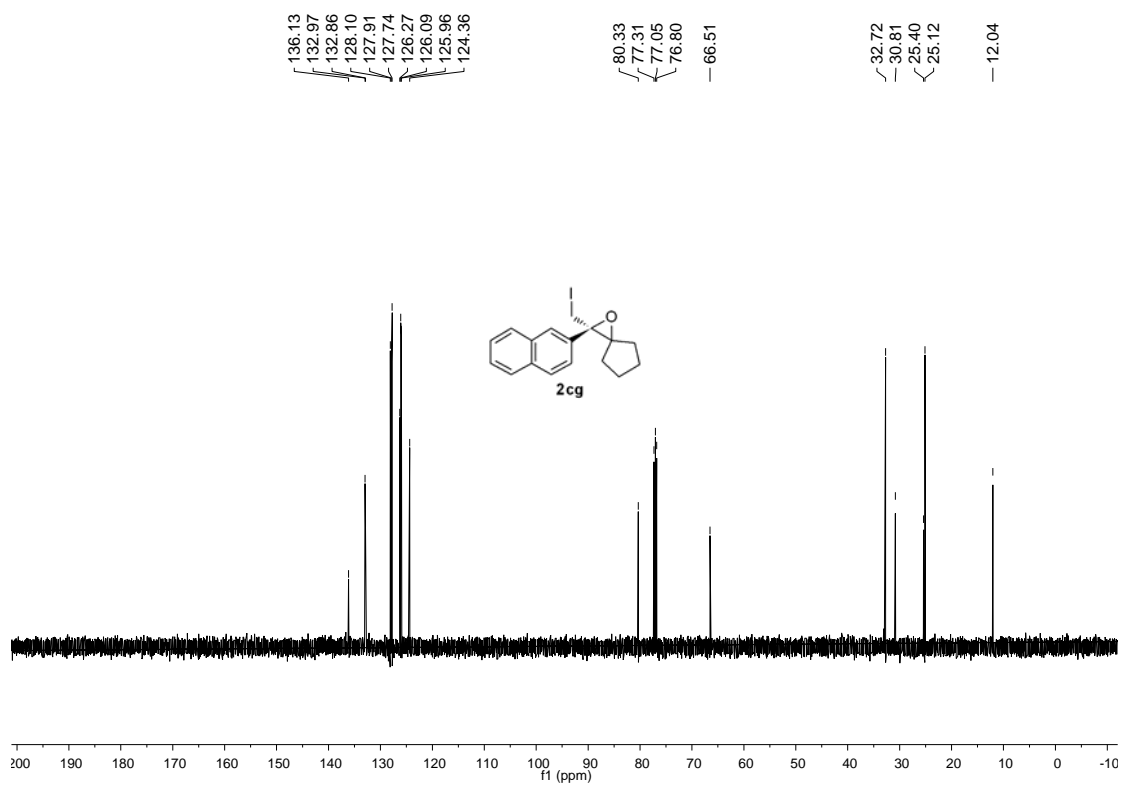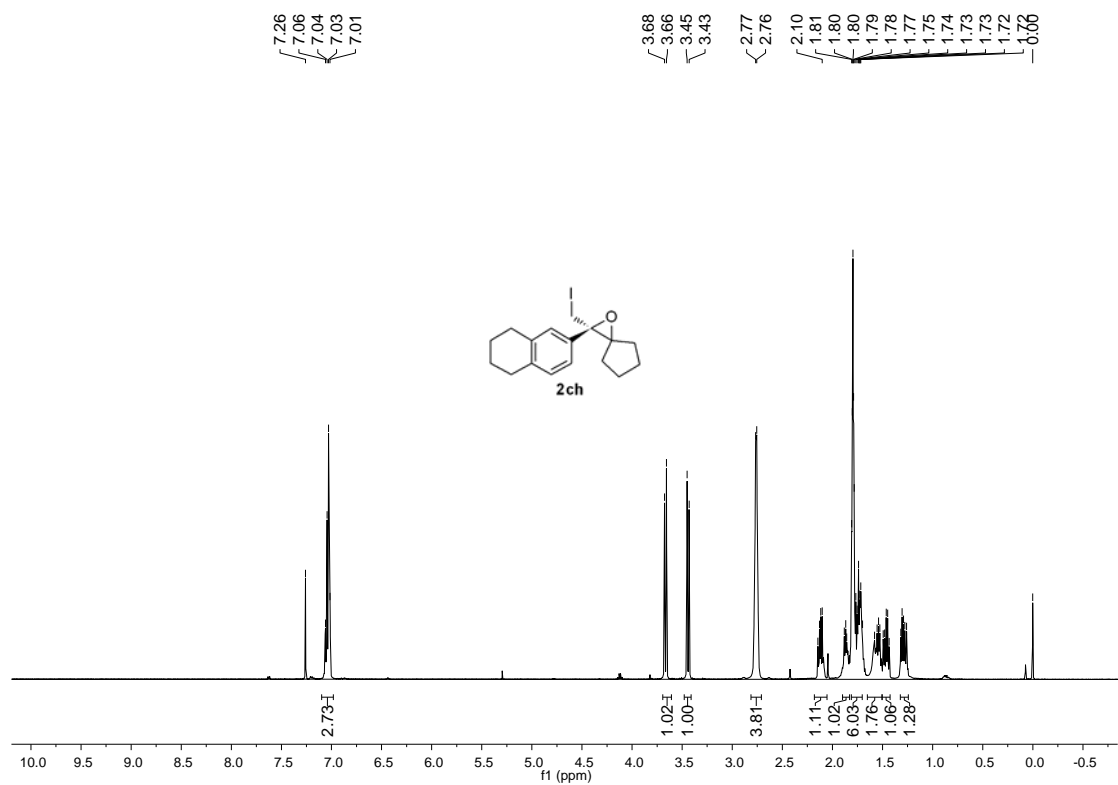

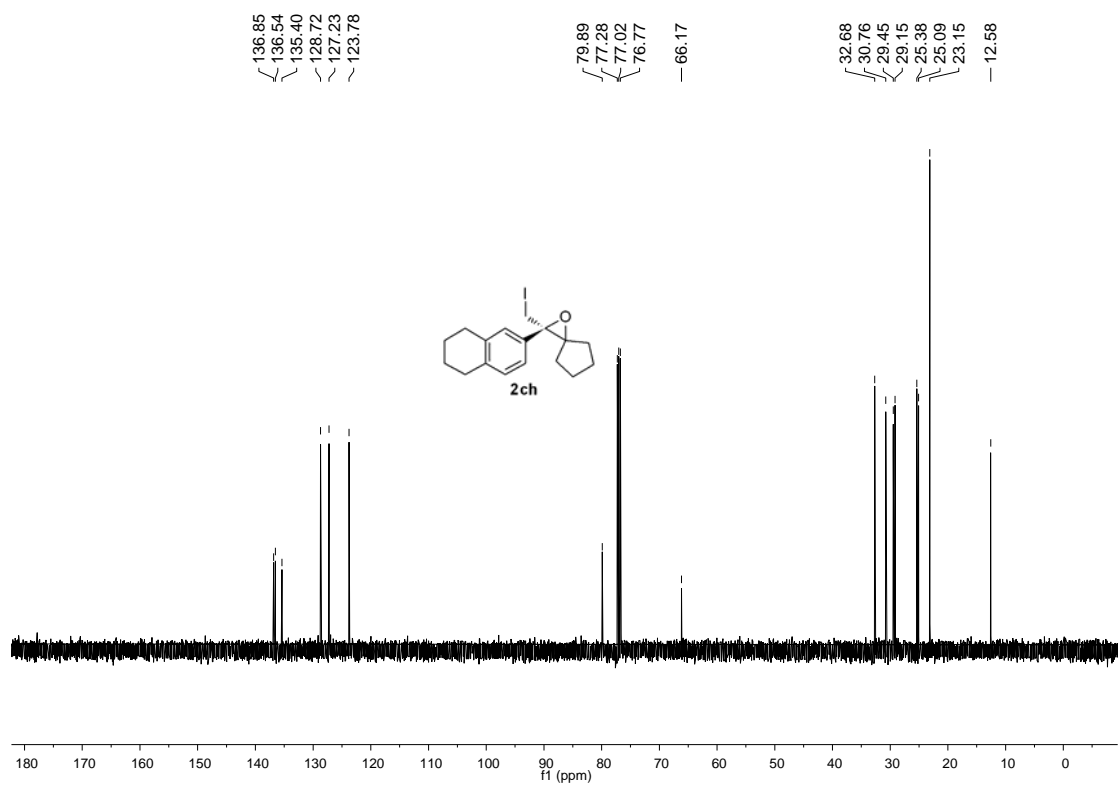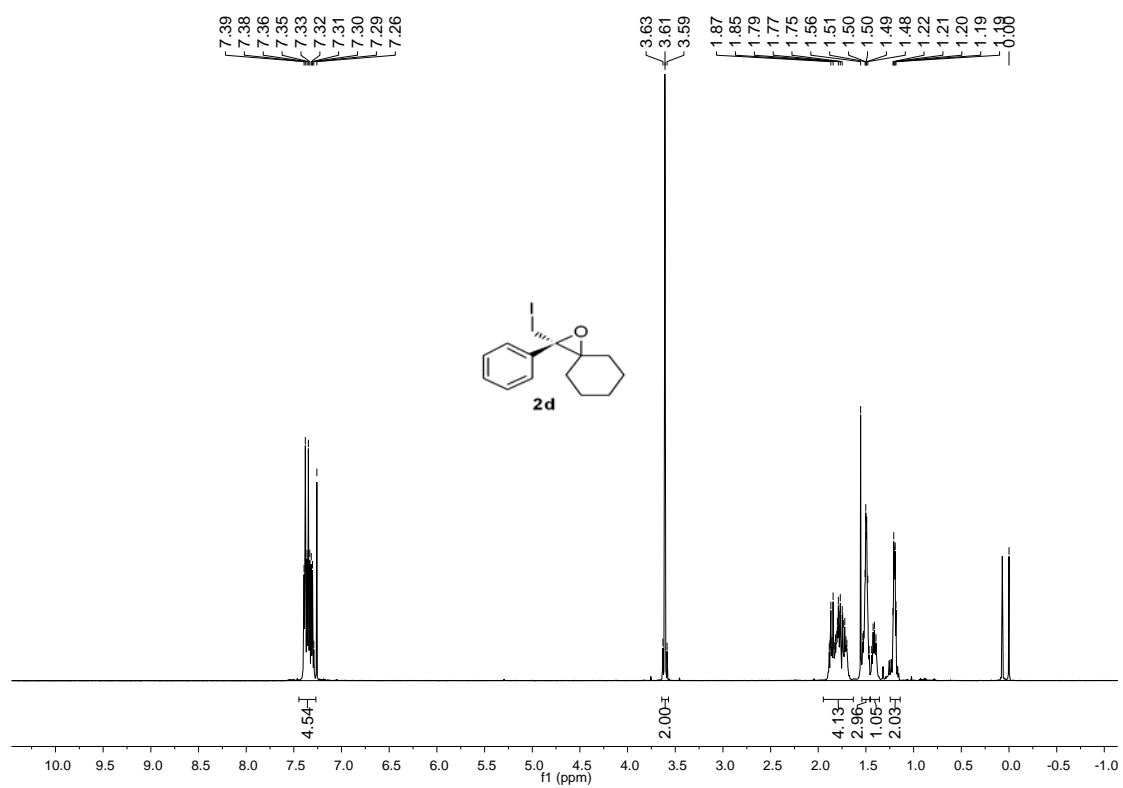

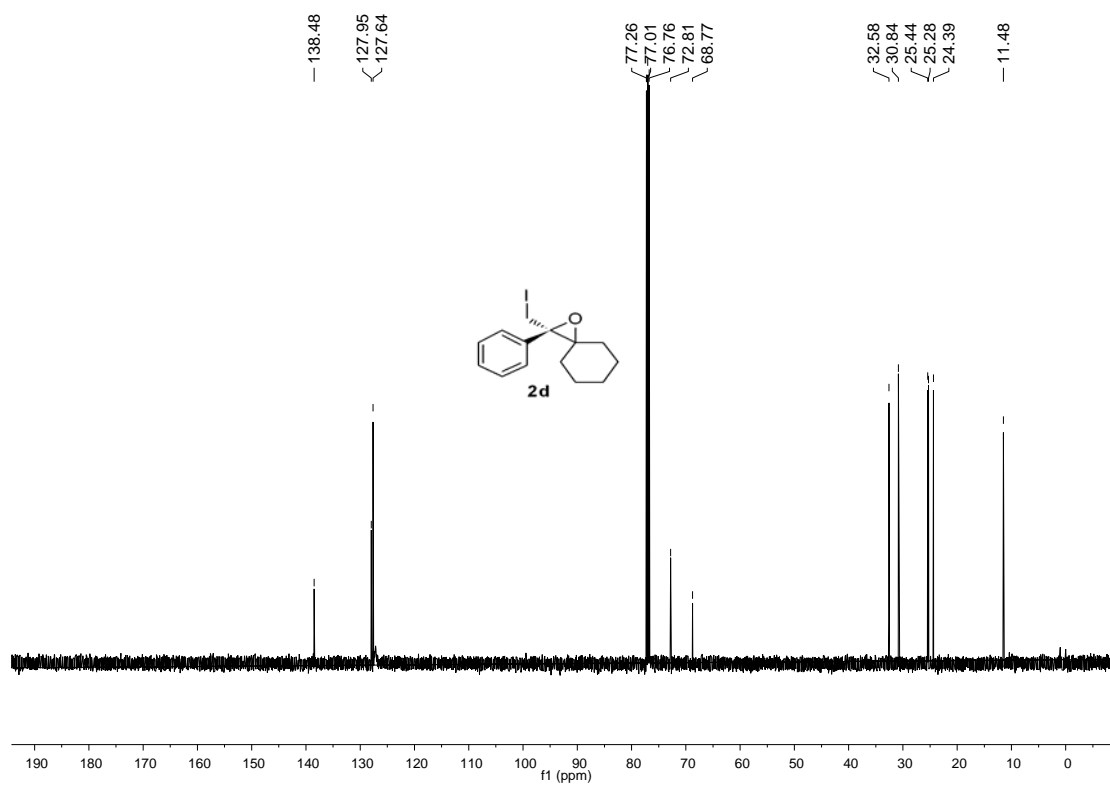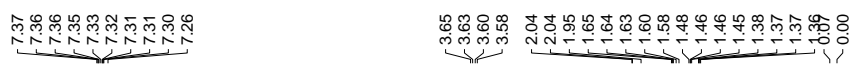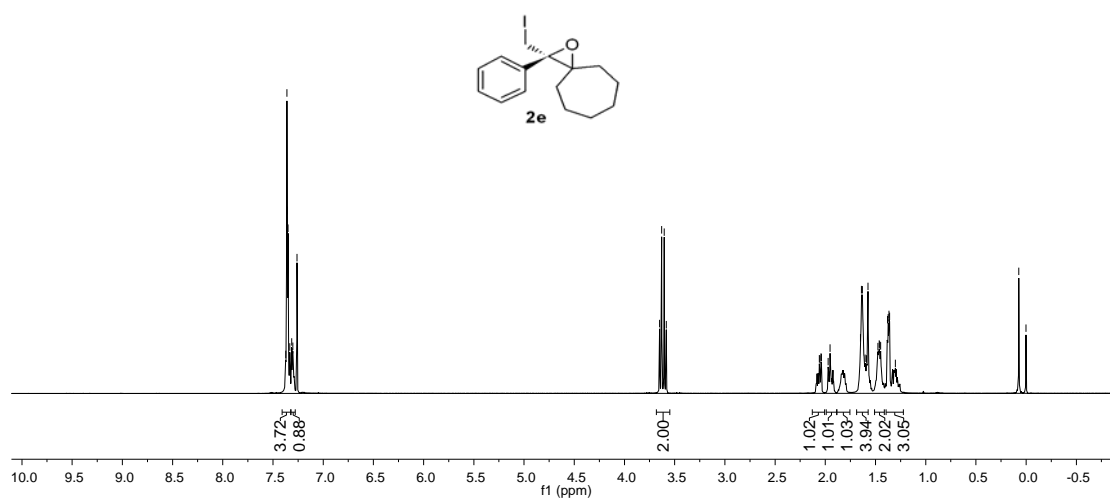

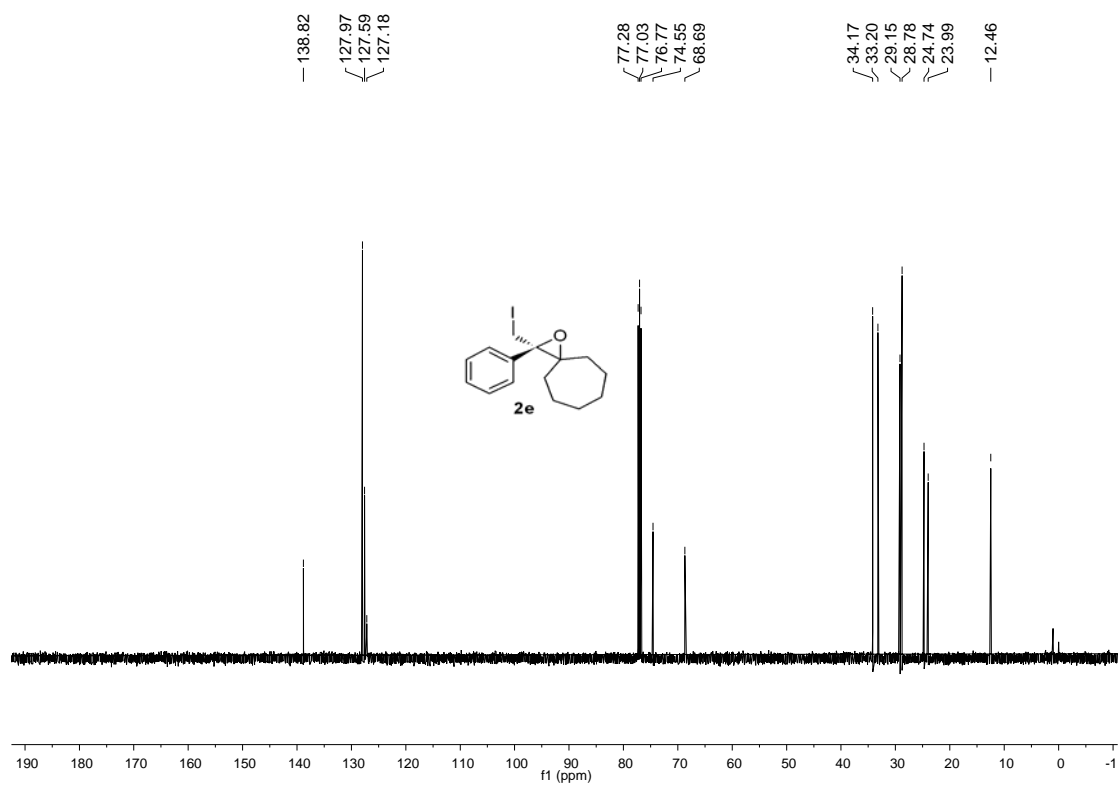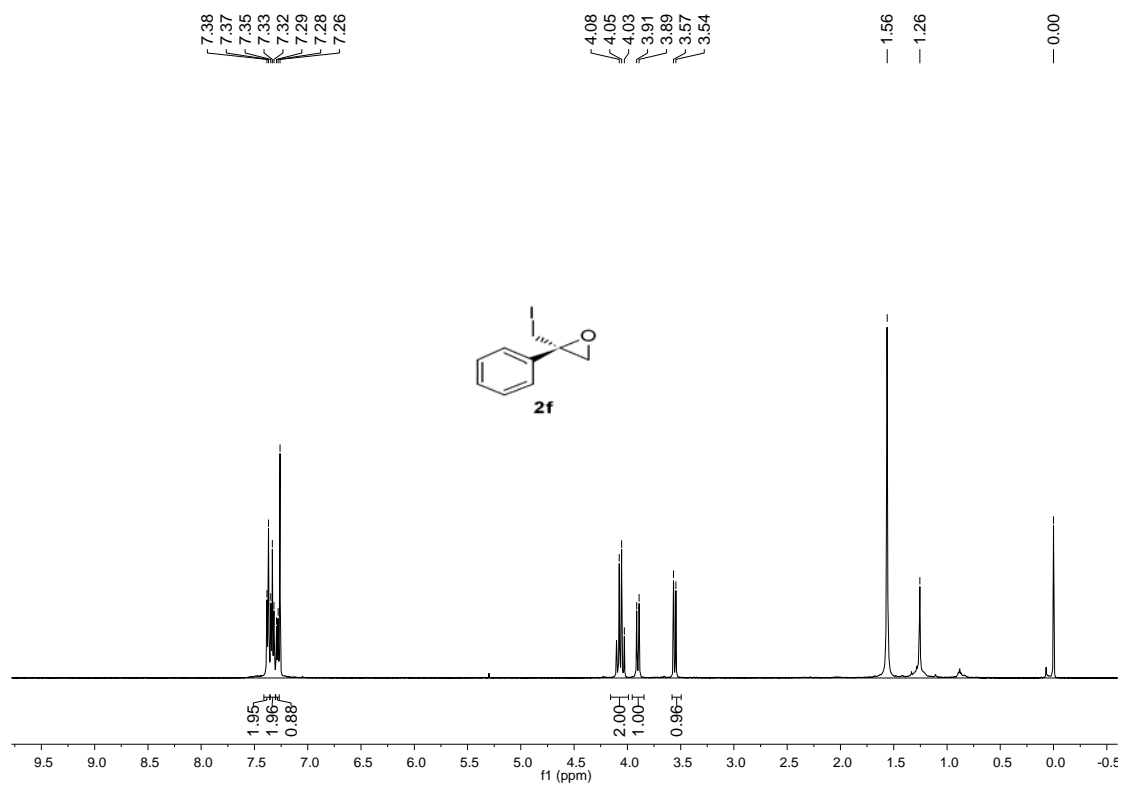

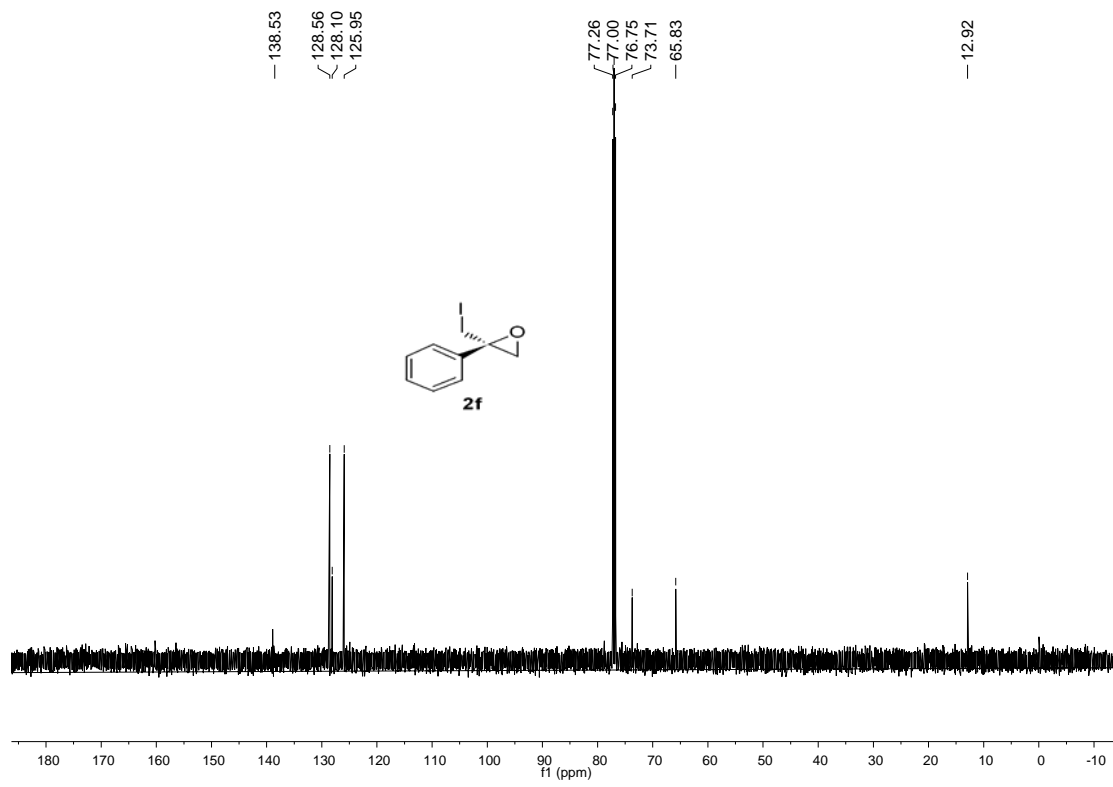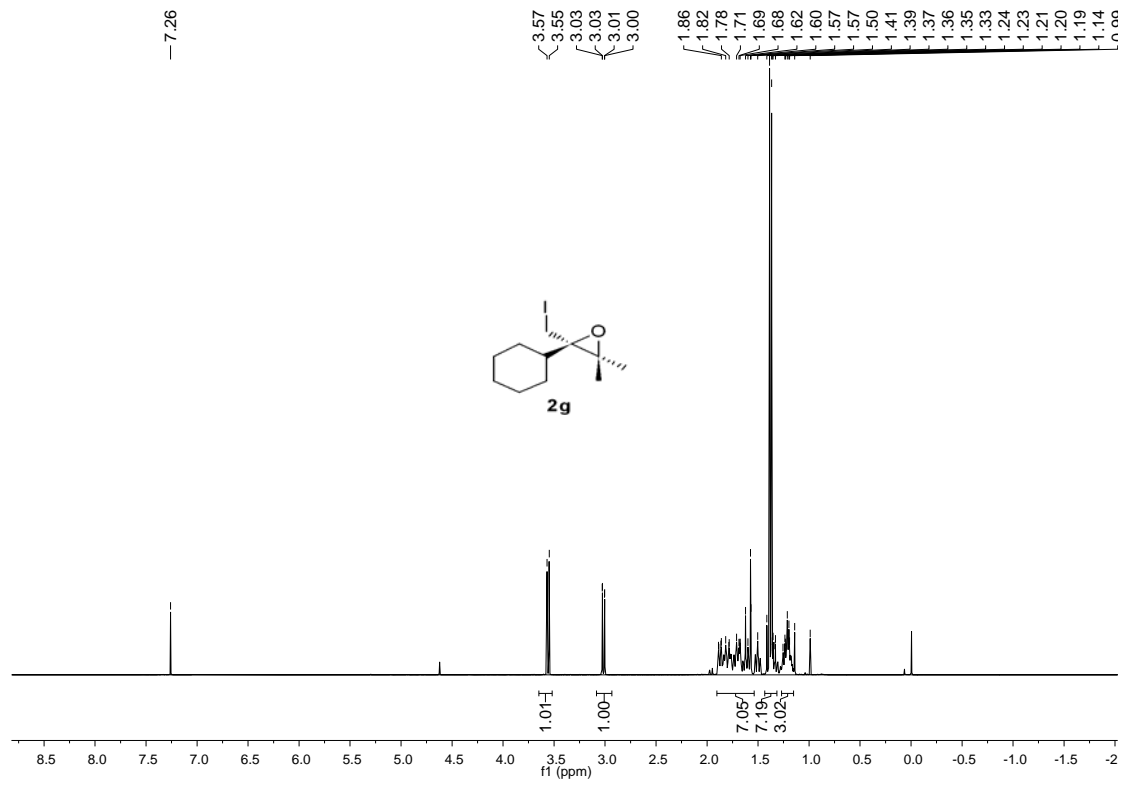



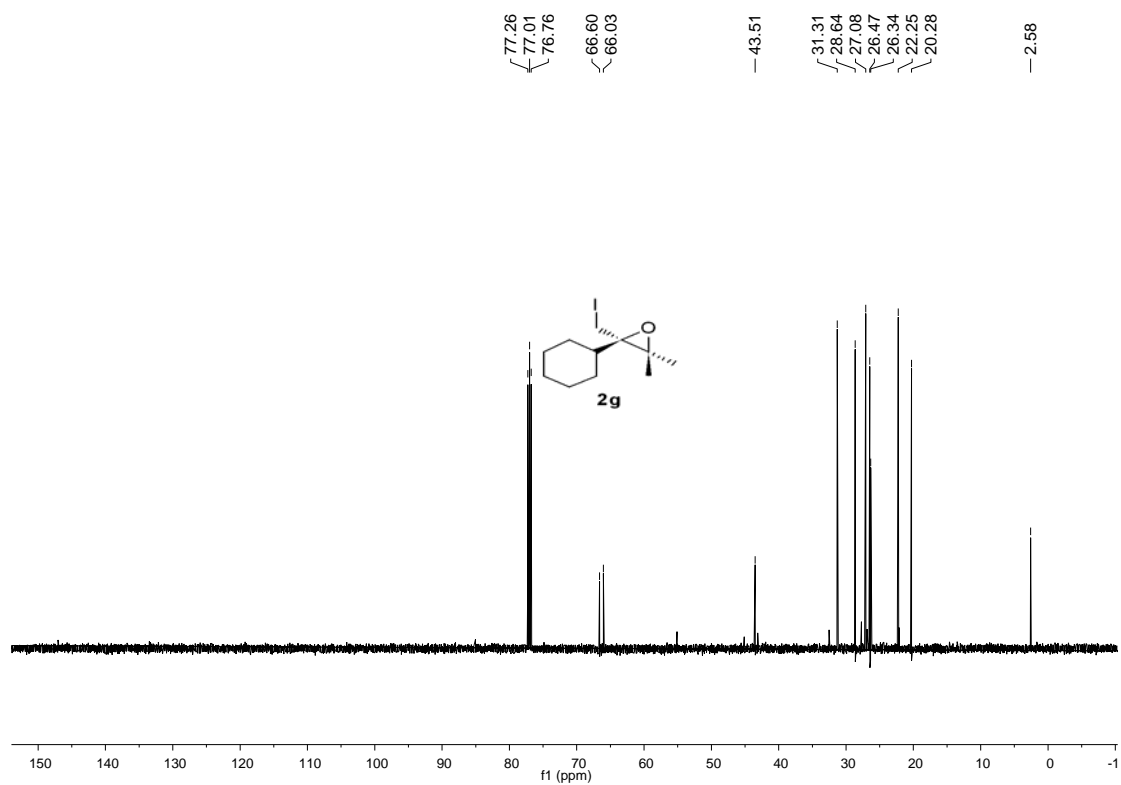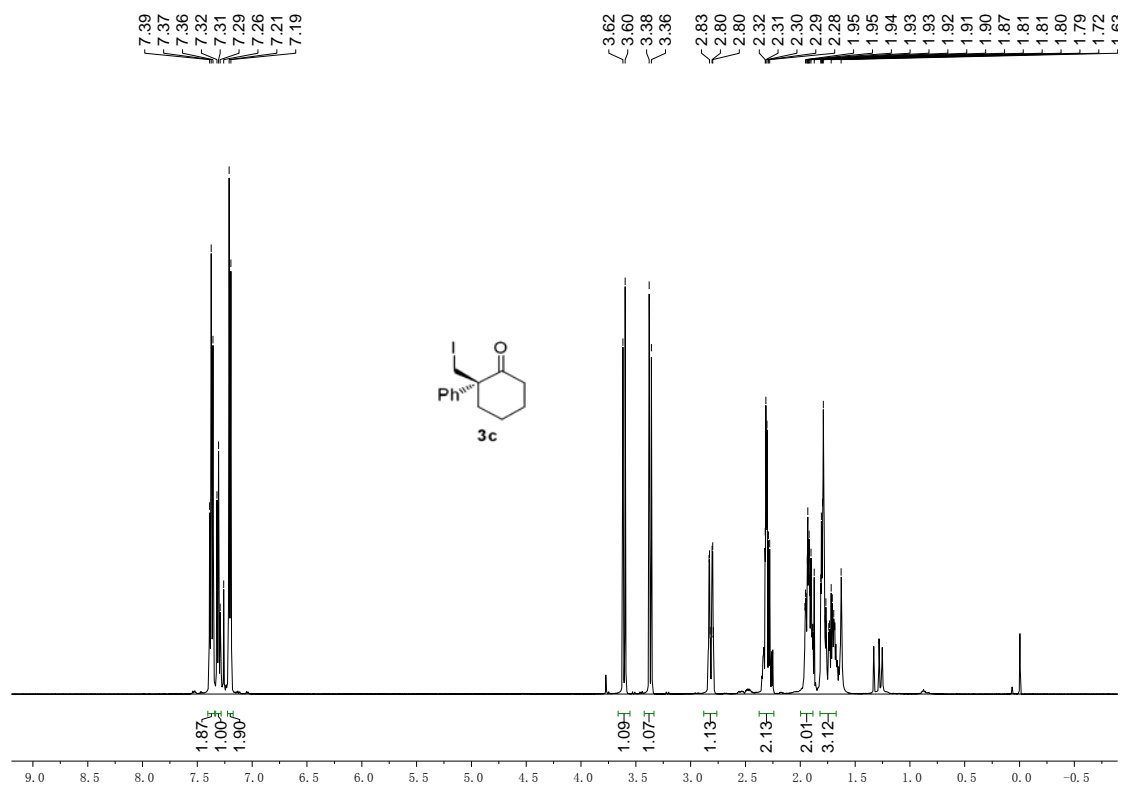

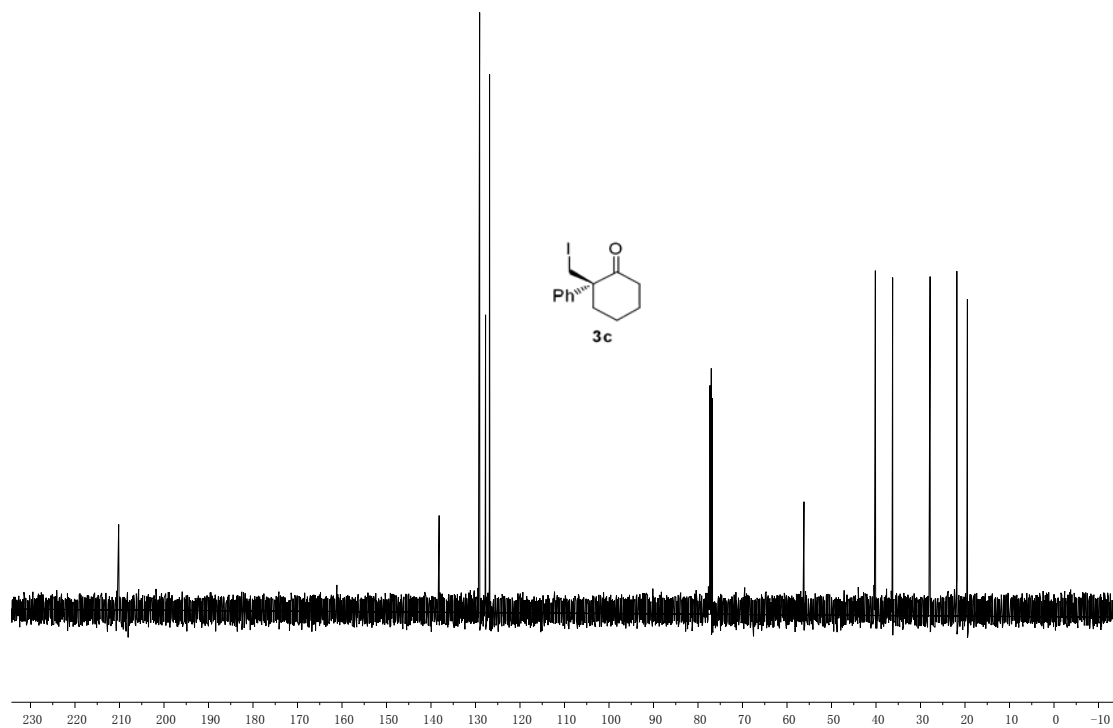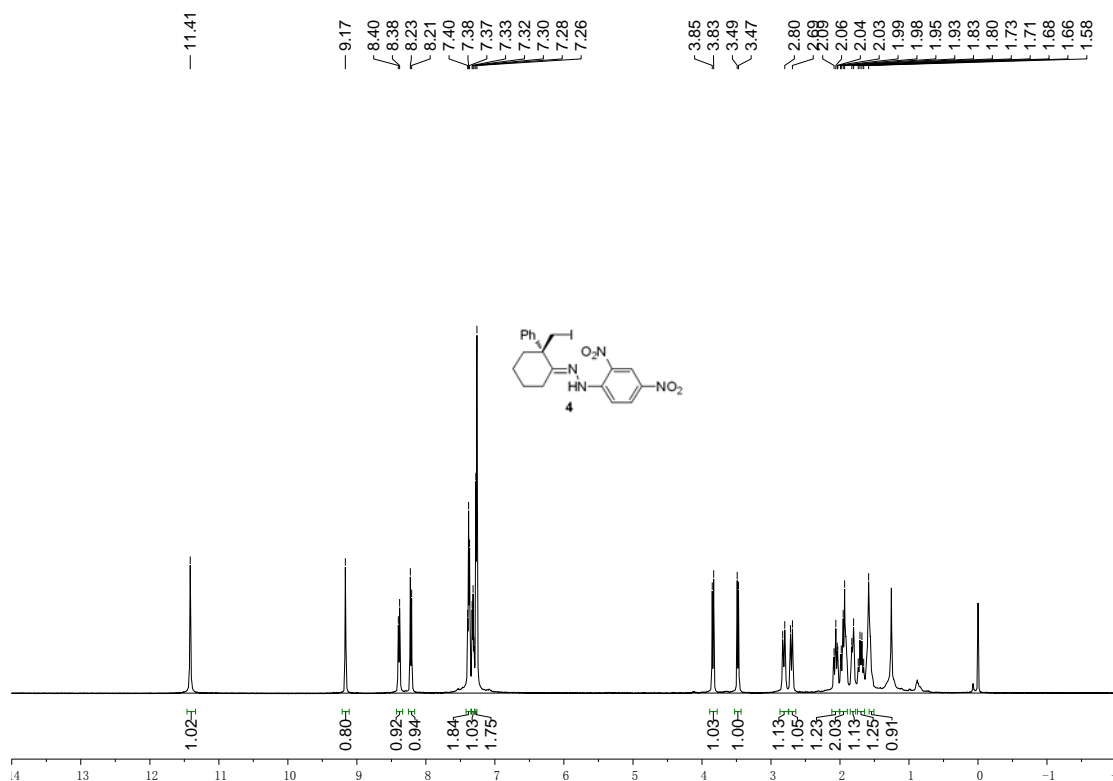

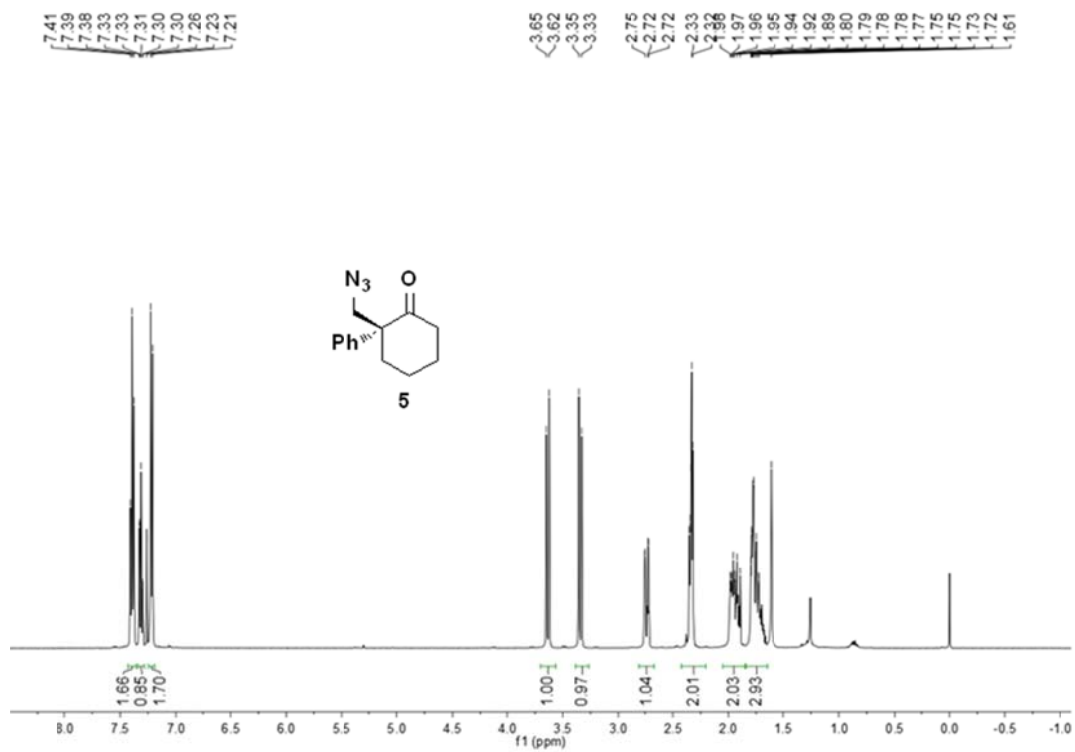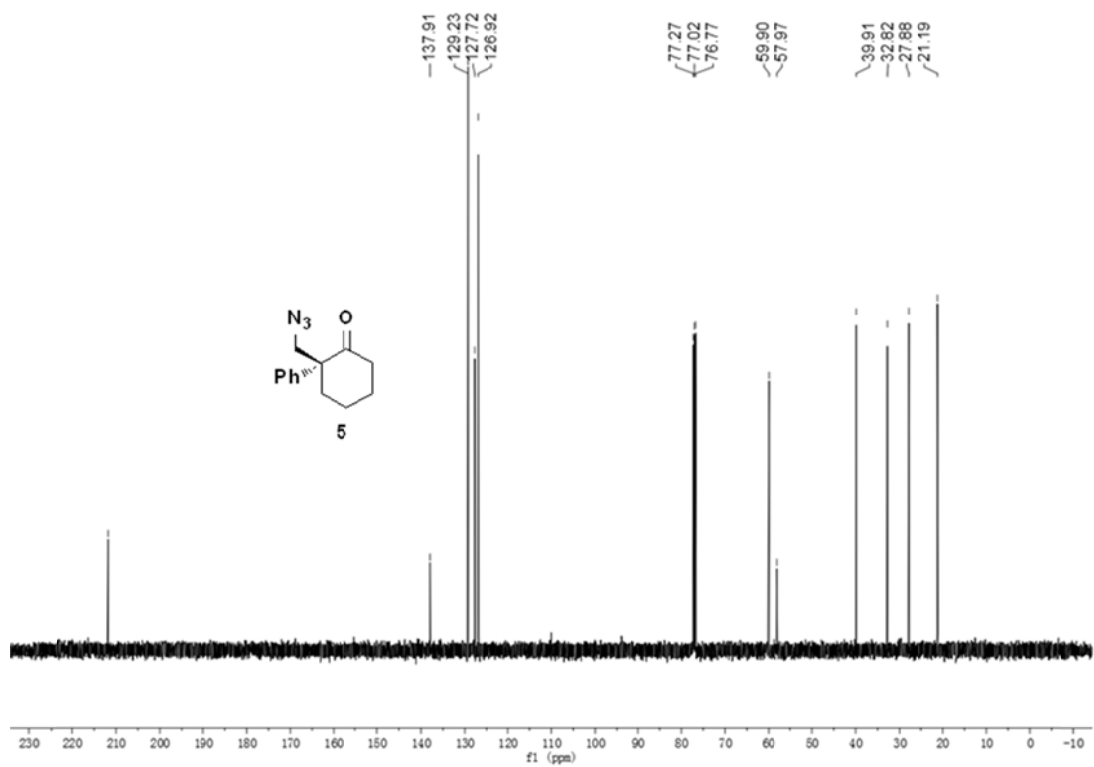

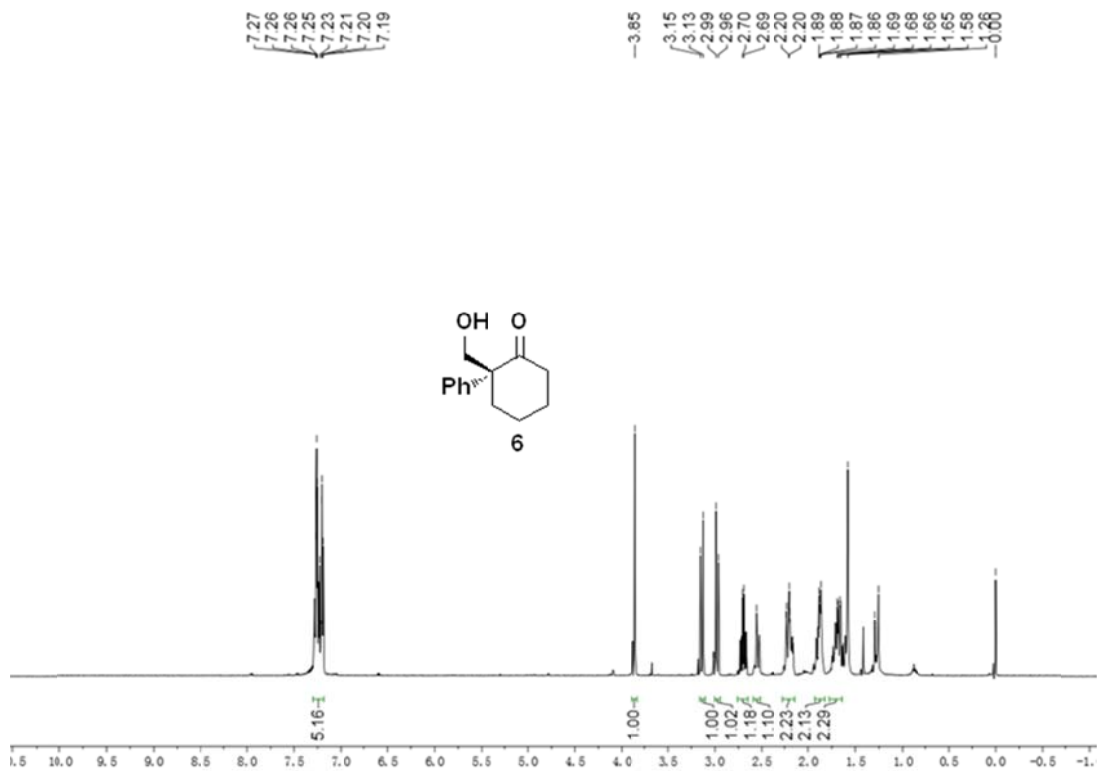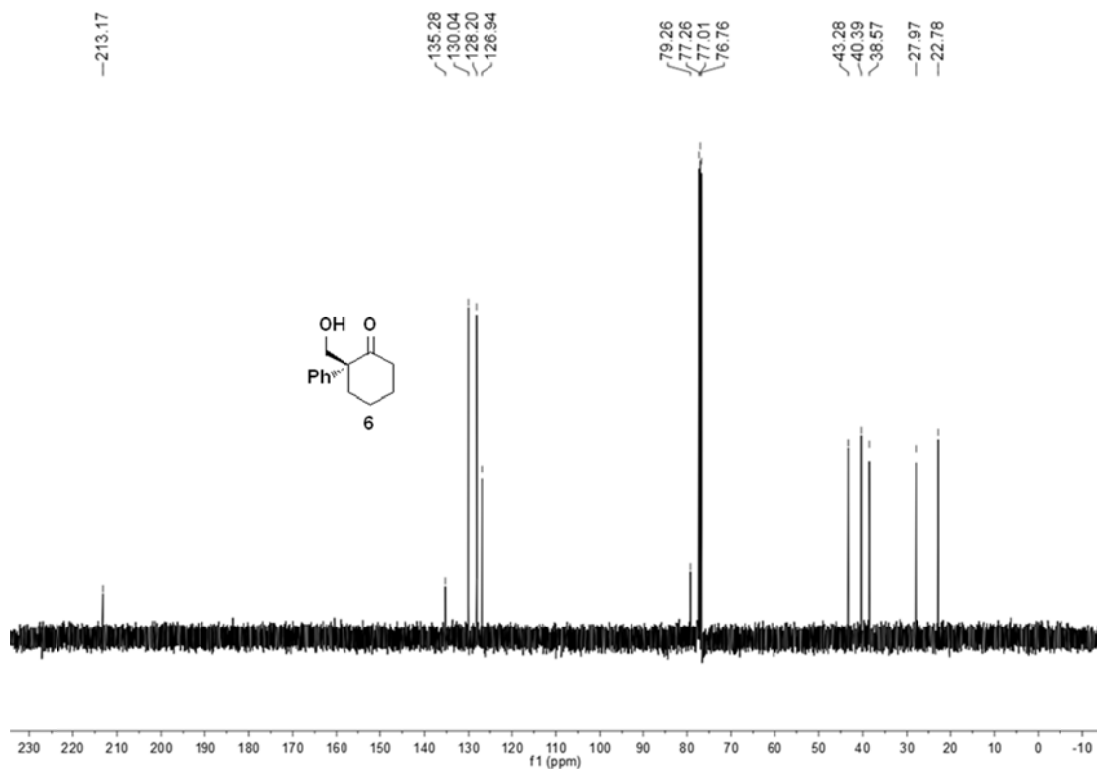

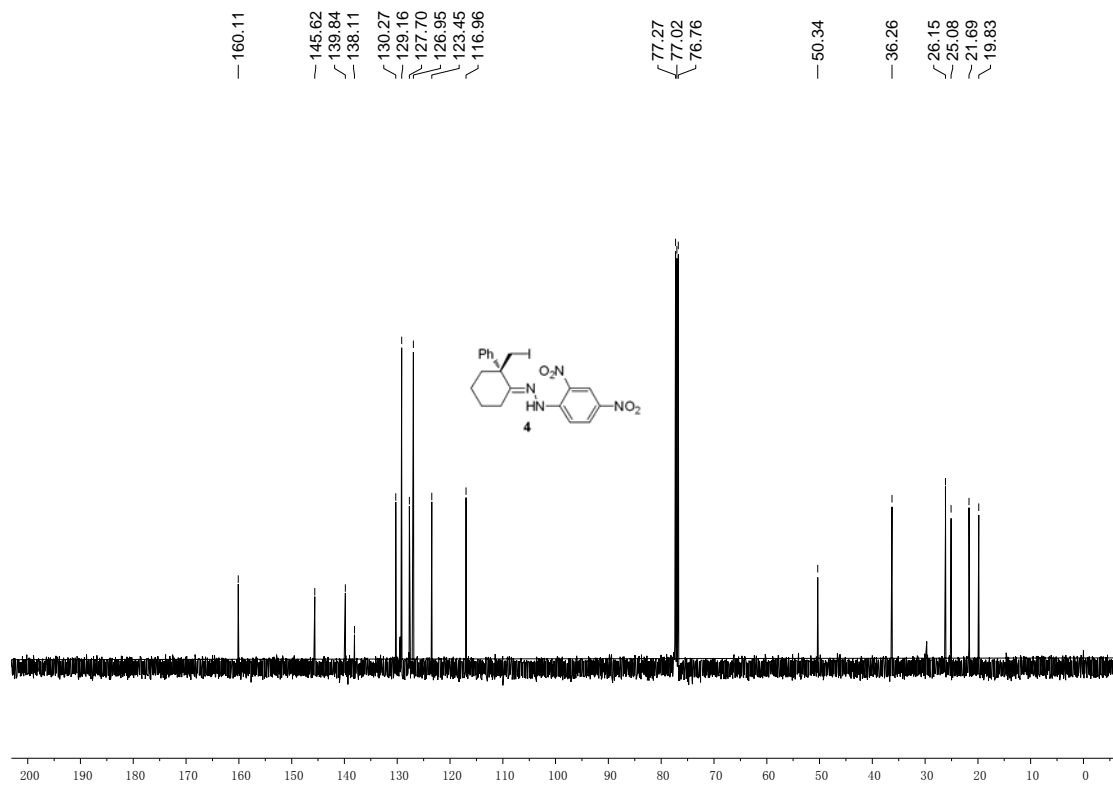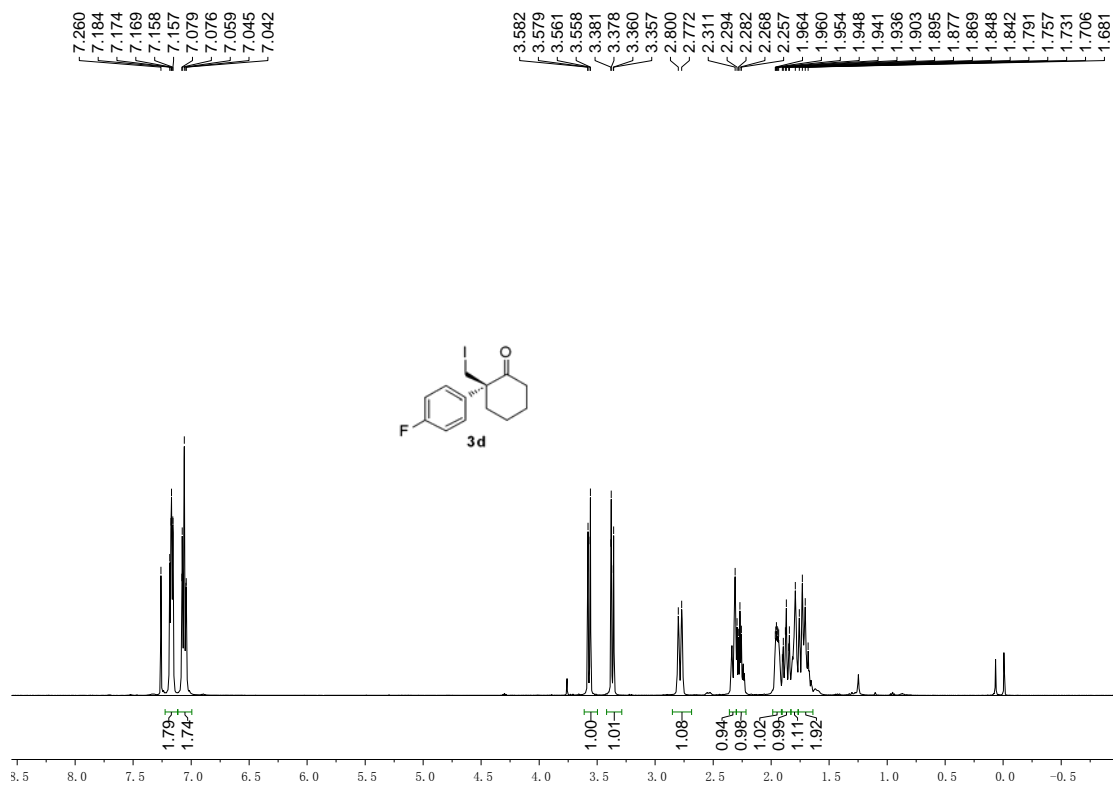

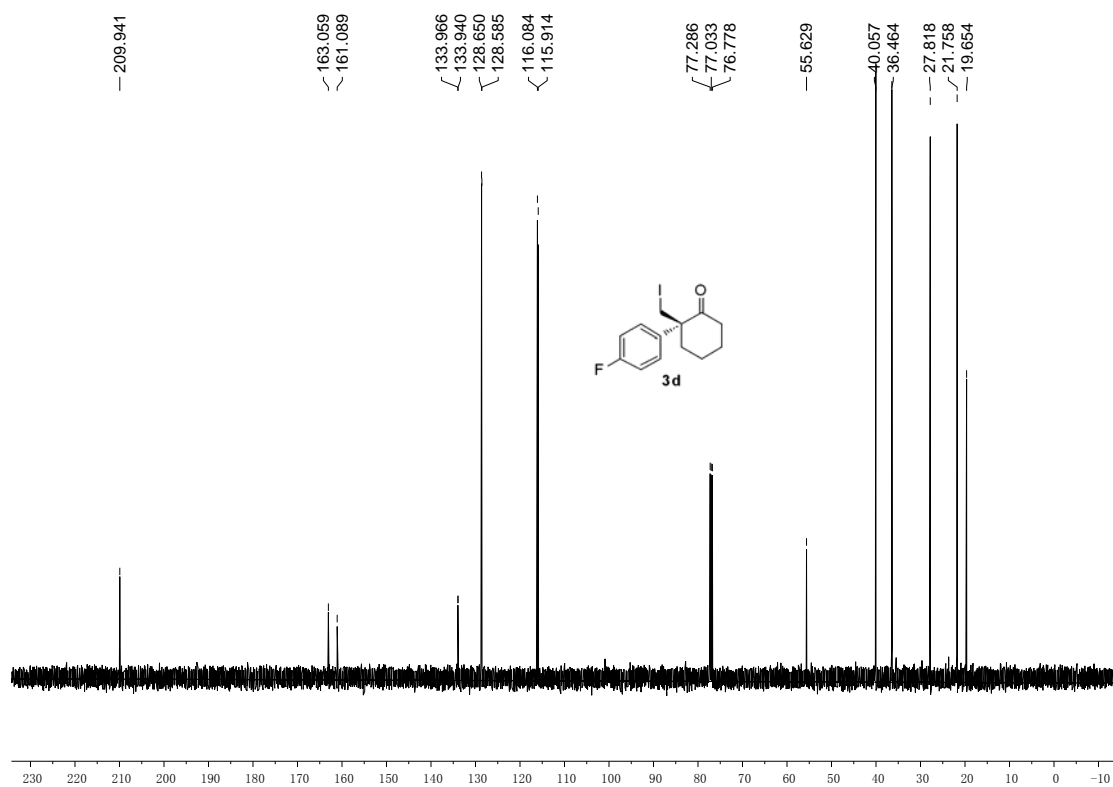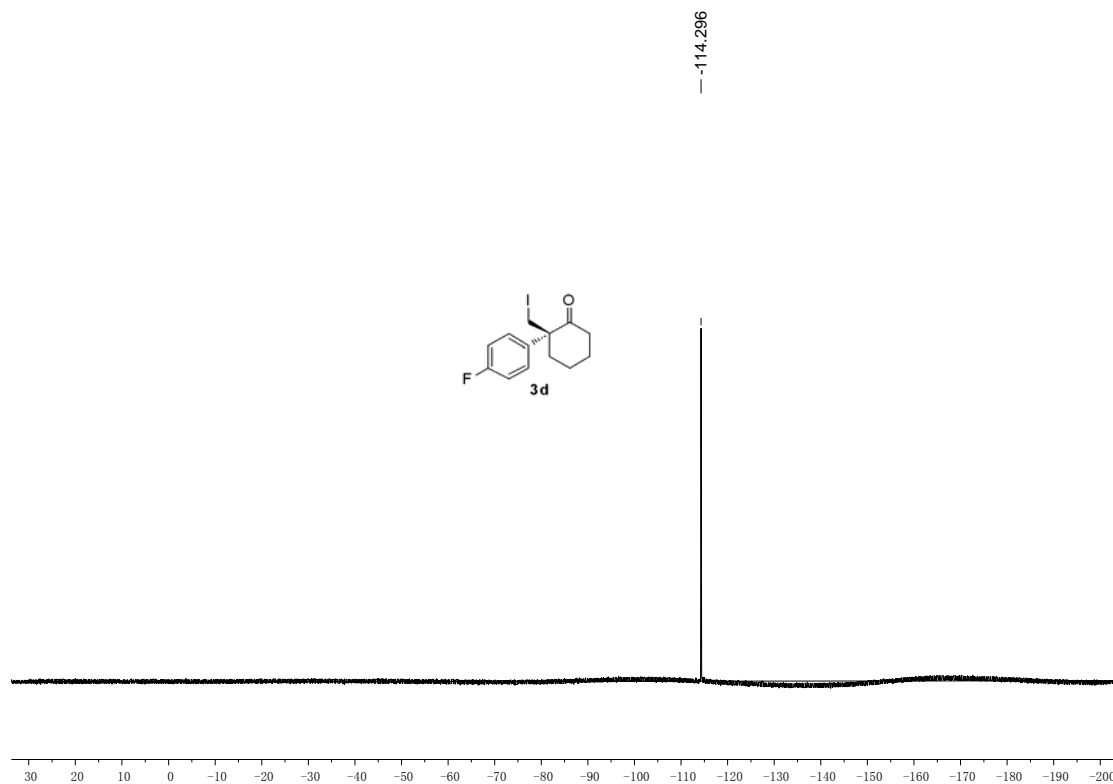

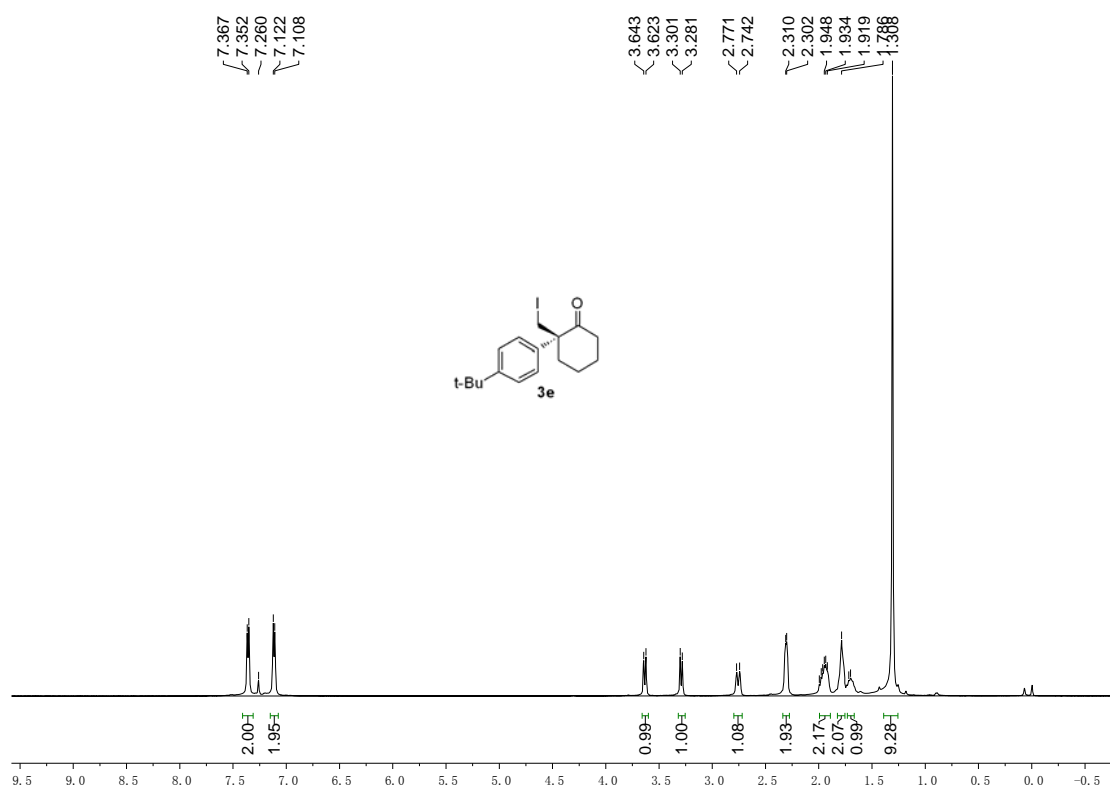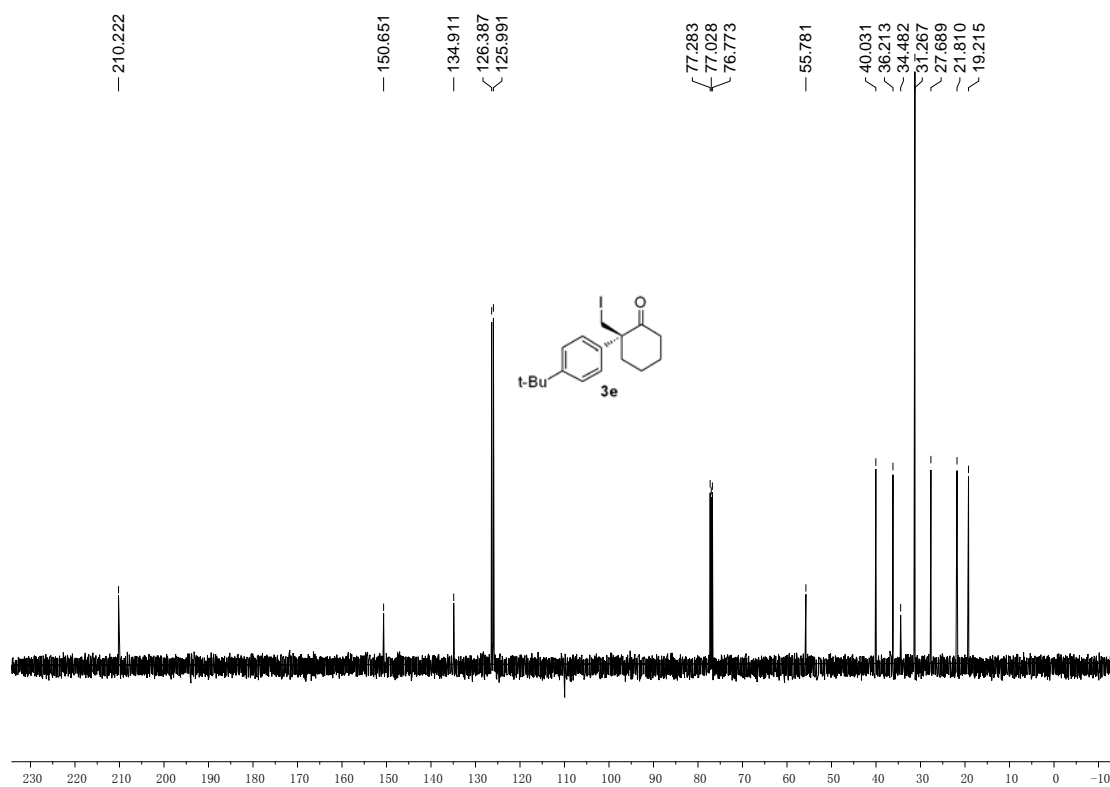

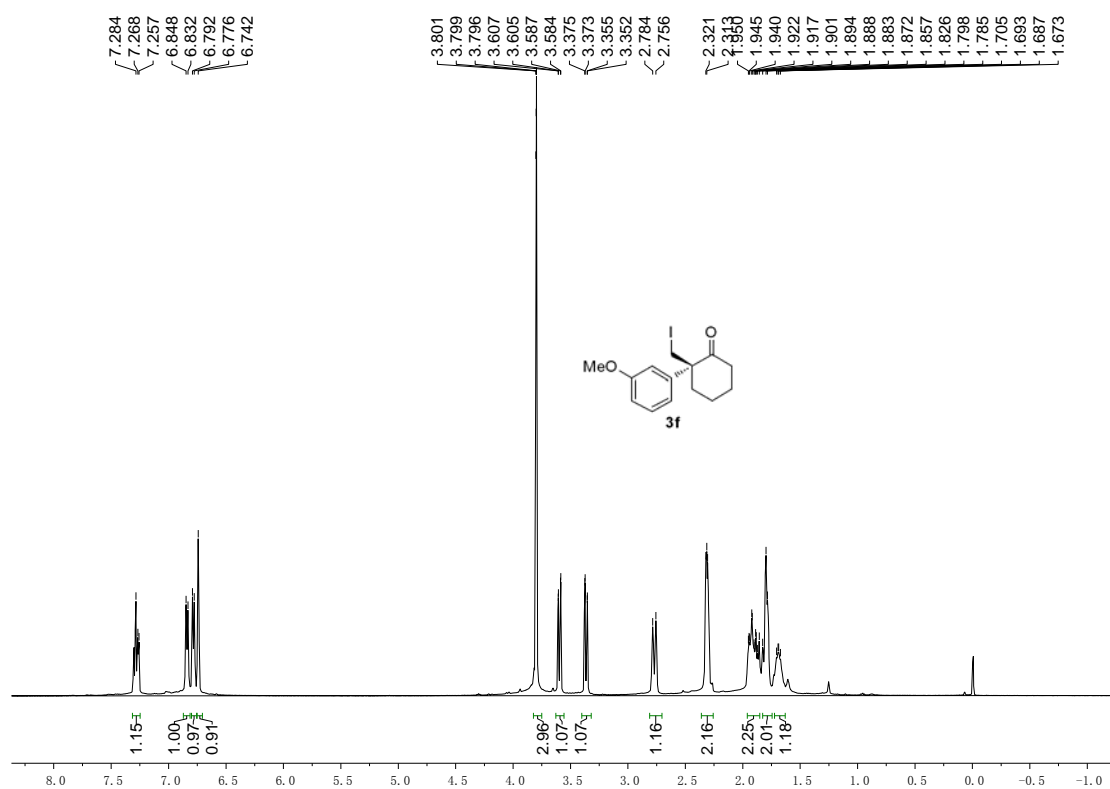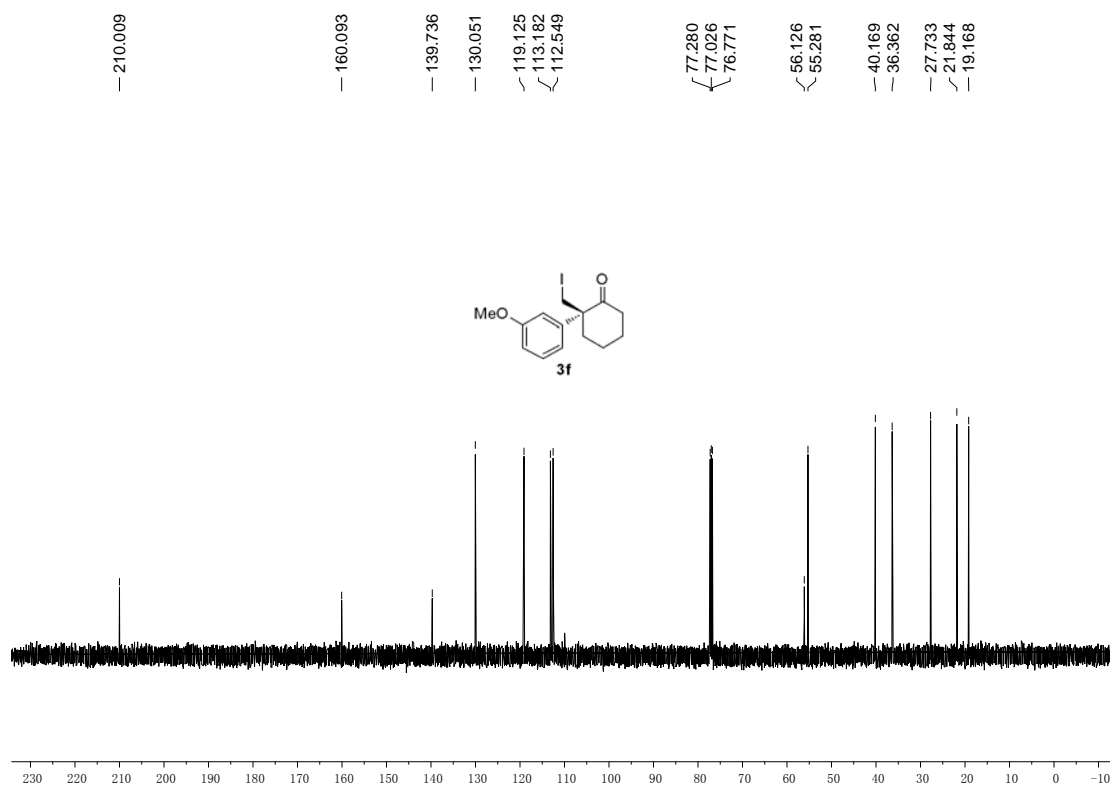



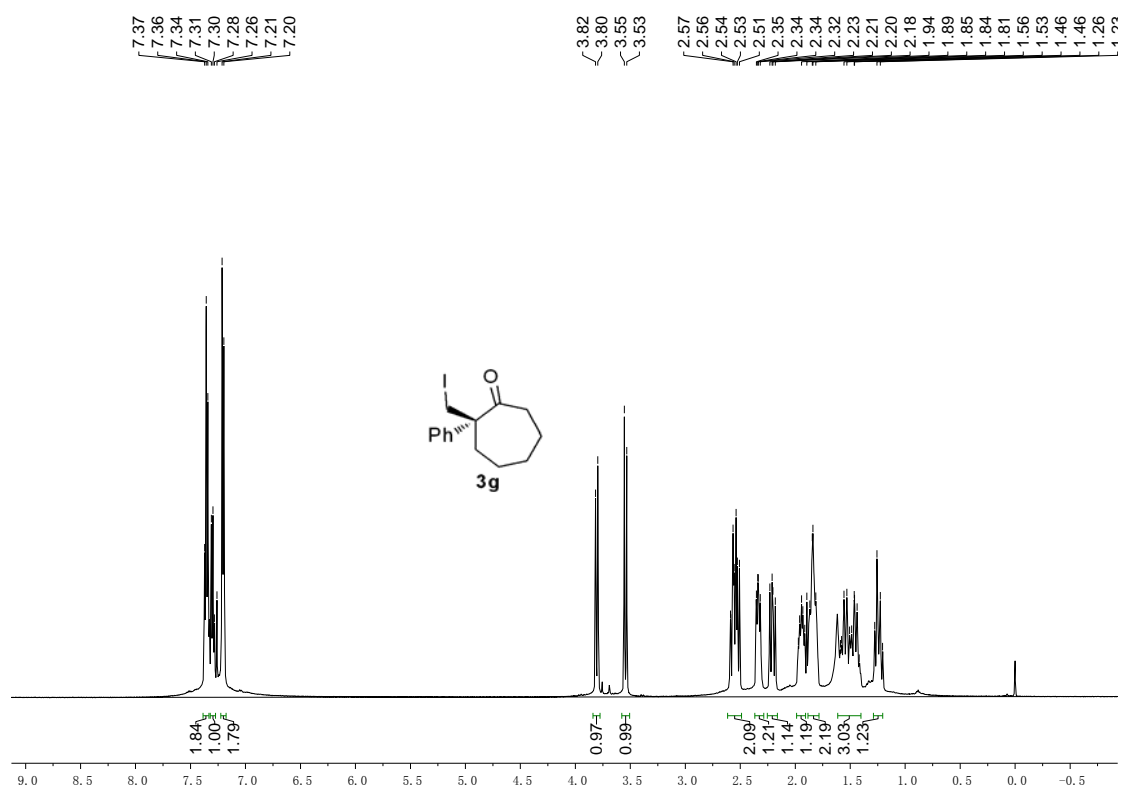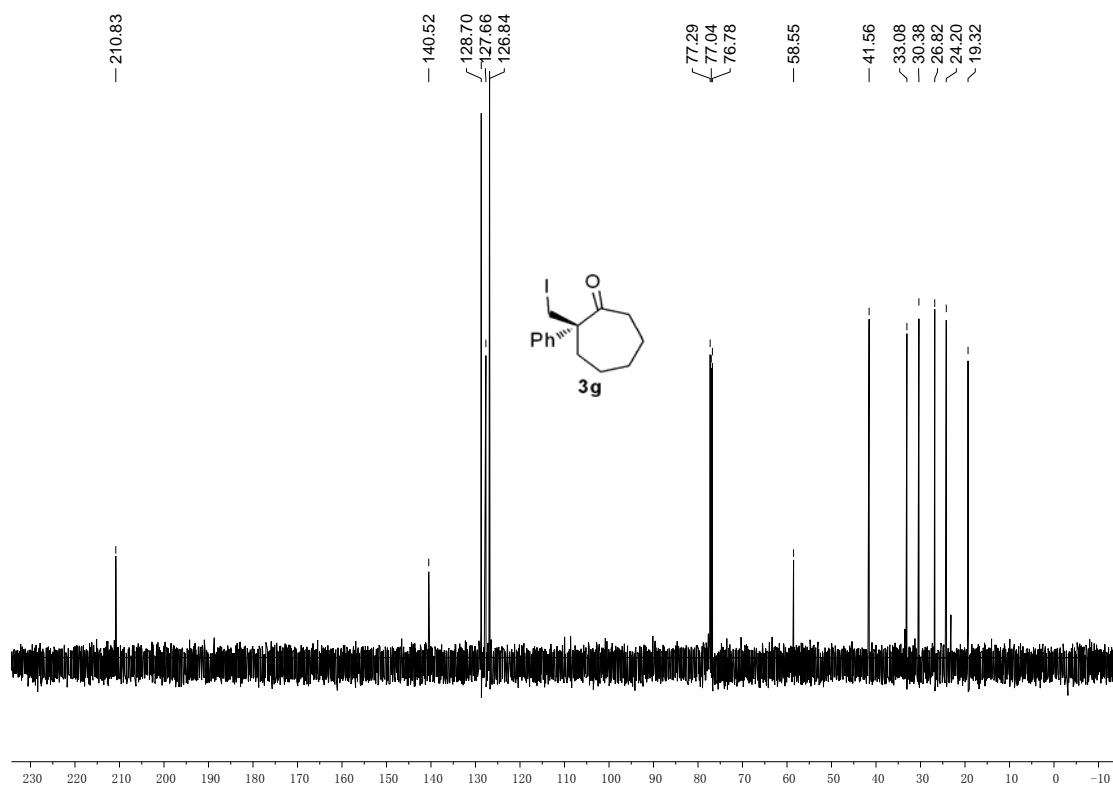

2919 SZG-5-35-1+- ID3 98515 214 0.5 15

|                  |                                   |                   |          |
|------------------|-----------------------------------|-------------------|----------|
| Sample Name:     | SZG-5-35-1+- ID3 98515 214 0.5 15 | Injection Volume: | 1.0      |
| Vial Number:     | BD3                               | Channel:          | UV_VIS_2 |
| Sample Type:     | unknown                           | Wavelength:       | 214.0    |
| Control Program: | test-dad                          | Bandwidth:        | 4        |
| Quantif. Method: | WXL                               | Dilution Factor:  | 1.0000   |
| Recording Time:  | 2014-9-15 17:41                   | Sample Weight:    | 1.0000   |
| Run Time (min):  | 13.00                             | Sample Amount:    | 1.0000   |

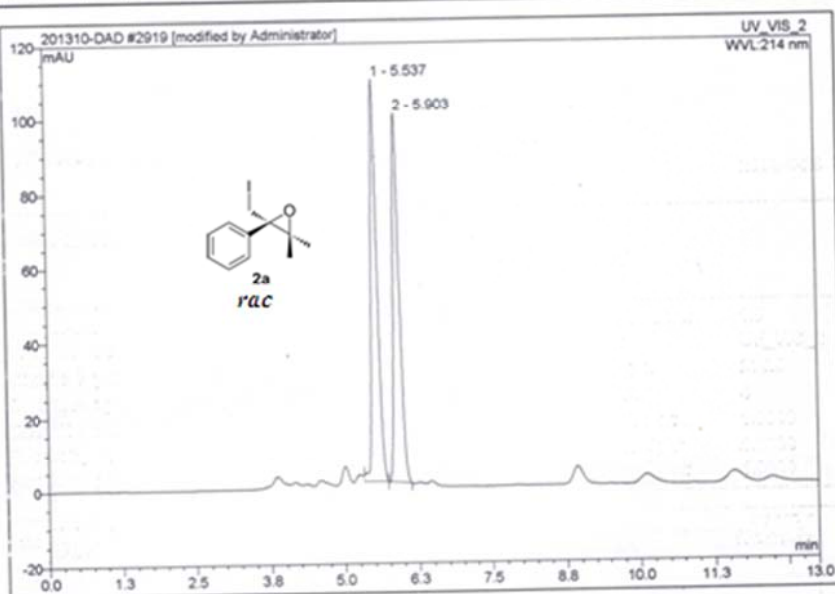

| No.           | Ret.Time<br>min | Peak Name | Height<br>mAU | Area<br>mAU*min | Rel.Area<br>% | Amount | Type |
|---------------|-----------------|-----------|---------------|-----------------|---------------|--------|------|
| 1             | 5.54            | n.a.      | 108.318       | 12.952          | 51.20         | n.a.   | Mb*  |
| 2             | 5.90            | n.a.      | 99.150        | 12.343          | 48.80         | n.a.   | bMB* |
| <b>Total:</b> |                 |           | 207.467       | 25.296          | 100.00        | 0.000  |      |

## 1998 SZG-9-40 ID3 98515 214 0.5 15

|                  |                               |                   |          |
|------------------|-------------------------------|-------------------|----------|
| Sample Name:     | SZG-9-40 ID3 98515 214 0.5 15 | Injection Volume: | 1.0      |
| Vial Number:     | RD5                           | Channel:          | UV_VIS_2 |
| Sample Type:     | unknown                       | Wavelength:       | 214.0    |
| Control Program: | test-dad2                     | Bandwidth:        | 4        |
| Quantif. Method: | WXL                           | Dilution Factor:  | 1.0000   |
| Recording Time:  | 2014-5-19 15:36               | Sample Weight:    | 1.0000   |
| Run Time (min):  | 11.51                         | Sample Amount:    | 1.0000   |

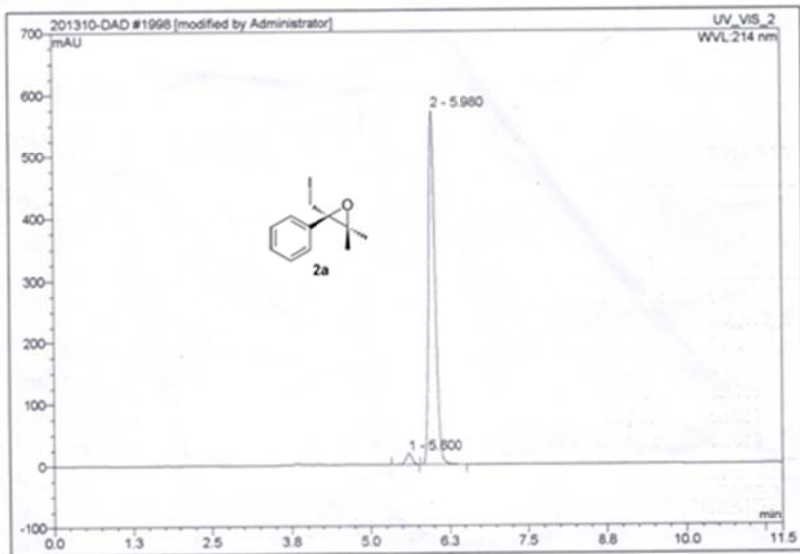

| No.    | Ret. Time<br>min | Peak Name | Height<br>mAU | Area<br>mAU*min | Rel. Area<br>% | Amount | Type |
|--------|------------------|-----------|---------------|-----------------|----------------|--------|------|
| 1      | 5.60             | n.a.      | 18.626        | 2.057           | 2.92           | n.a.   | BMB* |
| 2      | 5.98             | n.a.      | 572.307       | 68.484          | 97.08          | n.a.   | BMB* |
| Total: |                  |           | 590.933       | 70.541          | 100.00         | 0.000  |      |

2964 SZG-5-35-R ID3 98515 214 0.5 15

|                  |                                 |                   |          |
|------------------|---------------------------------|-------------------|----------|
| Sample Name:     | SZG-5-35-R ID3 98515 214 0.5 15 | Injection Volume: | 1.0      |
| Vial Number:     | GE4                             | Channel:          | UV_VIS_2 |
| Sample Type:     | unknown                         | Wavelength:       | 214.0    |
| Control Program: | test-dad                        | Bandwidth:        | 4        |
| Quantif. Method: | WXL                             | Dilution Factor:  | 1.0000   |
| Recording Time:  | 2014-9-19 11:04                 | Sample Weight:    | 1.0000   |
| Run Time (min):  | 25.98                           | Sample Amount:    | 1.0000   |

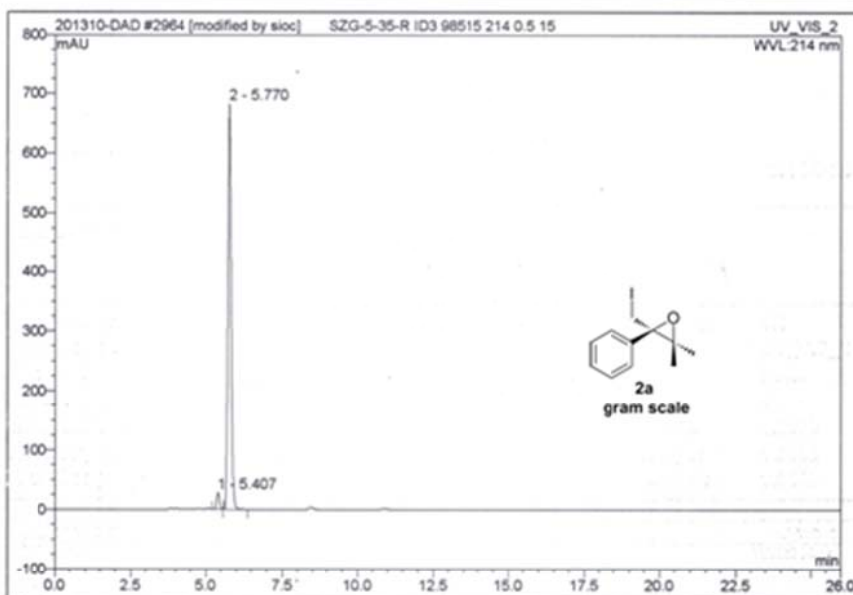

| No.           | Ret. Time<br>min | Peak Name | Height<br>mAU | Area<br>mAU*min | Rel. Area<br>% | Amount | Type |
|---------------|------------------|-----------|---------------|-----------------|----------------|--------|------|
| 1             | 5.41             | n.a.      | 28.271        | 3.271           | 3.66           | n.a.   | BMB* |
| 2             | 5.77             | n.a.      | 682.521       | 86.168          | 96.34          | n.a.   | BMB* |
| <b>Total:</b> |                  |           | 710.793       | 89.439          | 100.00         | 0.000  |      |

**1387 SZG-3-23-1+- ID3 98515 214 0.7**

|                  |                                |                   |          |
|------------------|--------------------------------|-------------------|----------|
| Sample Name:     | SZG-3-23-1+- ID3 98515 214 0.7 | Injection Volume: | 3.0      |
| Vial Number:     | RA2                            | Channel:          | UV_VIS_2 |
| Sample Type:     | unknown                        | Wavelength:       | 214.0    |
| Control Program: | test-dad3                      | Bandwidth:        | 4        |
| Quantif. Method: | WXL                            | Dilution Factor:  | 1.0000   |
| Recording Time:  | 2014-3-3 11:09                 | Sample Weight:    | 1.0000   |
| Run Time (min):  | 7.09                           | Sample Amount:    | 1.0000   |

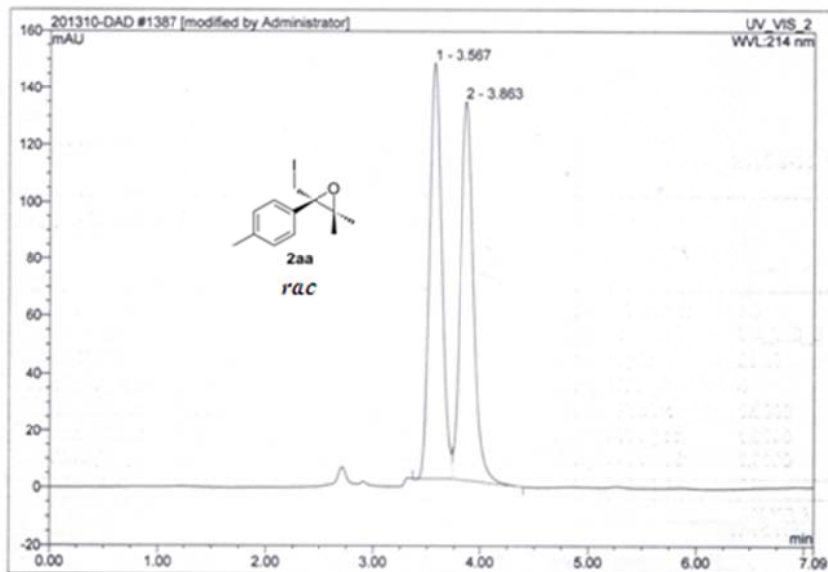

| No.           | Ret.Time<br>min | Peak Name | Height<br>mAU | Area<br>mAU*min | Rel.Area<br>% | Amount | Type |
|---------------|-----------------|-----------|---------------|-----------------|---------------|--------|------|
| 1             | 3.57            | n.a.      | 145.763       | 19.145          | 50.01         | n.a.   | BM * |
| 2             | 3.86            | n.a.      | 132.683       | 19.137          | 49.99         | n.a.   | MB * |
| <b>Total:</b> |                 |           | 278.446       | 38.281          | 100.00        | 0.000  |      |

**653 SZG-4-10-1 ID3 98515 214 0.7**

|                  |                              |                   |          |
|------------------|------------------------------|-------------------|----------|
| Sample Name:     | SZG-4-10-1 ID3 98515 214 0.7 | Injection Volume: | 0.8      |
| Vial Number:     | GD2                          | Channel:          | UV_VIS_1 |
| Sample Type:     | unknown                      | Wavelength:       | 214      |
| Control Program: | WXL-2014-1                   | Bandwidth:        | n.a.     |
| Quantif. Method: | WXL                          | Dilution Factor:  | 1.0000   |
| Recording Time:  | 2014/5/26 11:01              | Sample Weight:    | 1.0000   |
| Run Time (min):  | 5.27                         | Sample Amount:    | 1.0000   |

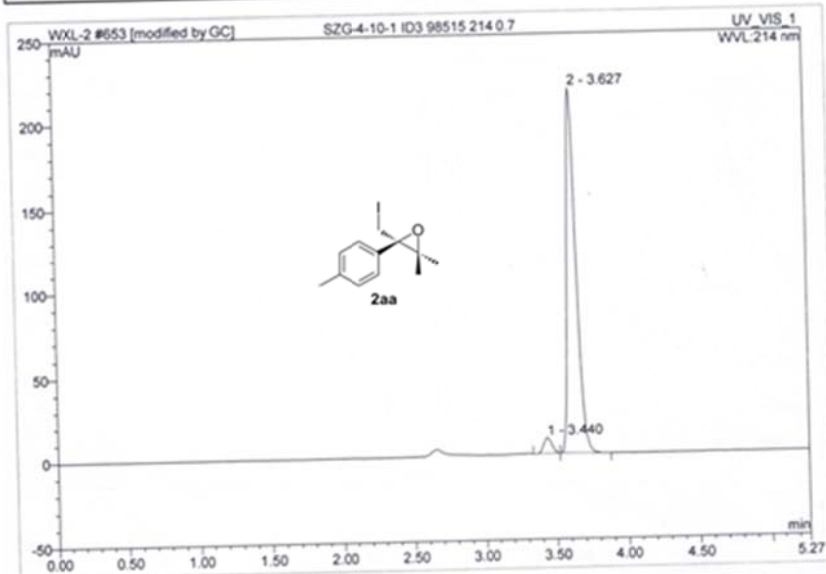

| No.           | Ret.Time<br>min | Peak Name | Height<br>mAU | Area<br>mAU*min | Rel.Area<br>% | Amount | Type |
|---------------|-----------------|-----------|---------------|-----------------|---------------|--------|------|
| 1             | 3.44            | n.a.      | 9.311         | 0.613           | 3.66          | n.a.   | BMB* |
| 2             | 3.63            | n.a.      | 216.894       | 16.154          | 96.34         | n.a.   | bMB* |
| <b>Total:</b> |                 |           | 226.205       | 16.767          | 100.00        | 0.000  |      |

**1464 SZG-3-28-1+- ADH 98515 214 0.4**

|                  |                                |                   |          |
|------------------|--------------------------------|-------------------|----------|
| Sample Name:     | SZG-3-28-1+- ADH 98515 214 0.4 | Injection Volume: | 0.6      |
| Vial Number:     | GB1                            | Channel:          | UV_VIS_2 |
| Sample Type:     | unknown                        | Wavelength:       | 214.0    |
| Control Program: | test-dad2                      | Bandwidth:        | 4        |
| Quantif. Method: | WXL                            | Dilution Factor:  | 1.0000   |
| Recording Time:  | 2014-3-10 12:41                | Sample Weight:    | 1.0000   |
| Run Time (min):  | 13.82                          | Sample Amount:    | 1.0000   |

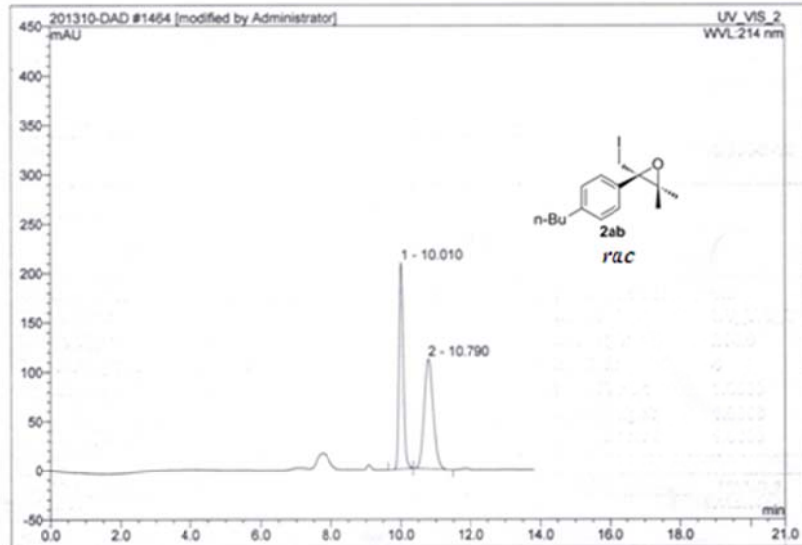

| No.           | Ret.Time<br>min | Peak Name | Height<br>mAU | Area<br>mAU*min | Rel.Area<br>% | Amount | Type |
|---------------|-----------------|-----------|---------------|-----------------|---------------|--------|------|
| 1             | 10.01           | n.a.      | 209.568       | 29.418          | 46.88         | n.a.   | BMB* |
| 2             | 10.79           | n.a.      | 111.552       | 33.339          | 53.12         | n.a.   | bMB* |
| <b>Total:</b> |                 |           | 321.120       | 62.757          | 100.00        | 0.000  |      |

## 2066 XZL-4-10-2 AD-H 98515 214 0.4

|                  |                               |                   |          |
|------------------|-------------------------------|-------------------|----------|
| Sample Name:     | XZL-4-10-2 AD-H 98515 214 0.4 | Injection Volume: | 1.0      |
| Vial Number:     | GE2                           | Channel:          | UV_VIS_2 |
| Sample Type:     | unknown                       | Wavelength:       | 214.0    |
| Control Program: | test-dad2                     | Bandwidth:        | 4        |
| Quantif. Method: | WXL                           | Dilution Factor:  | 1.0000   |
| Recording Time:  | 2014-5-26 14:05               | Sample Weight:    | 1.0000   |
| Run Time (min):  | 18.64                         | Sample Amount:    | 1.0000   |

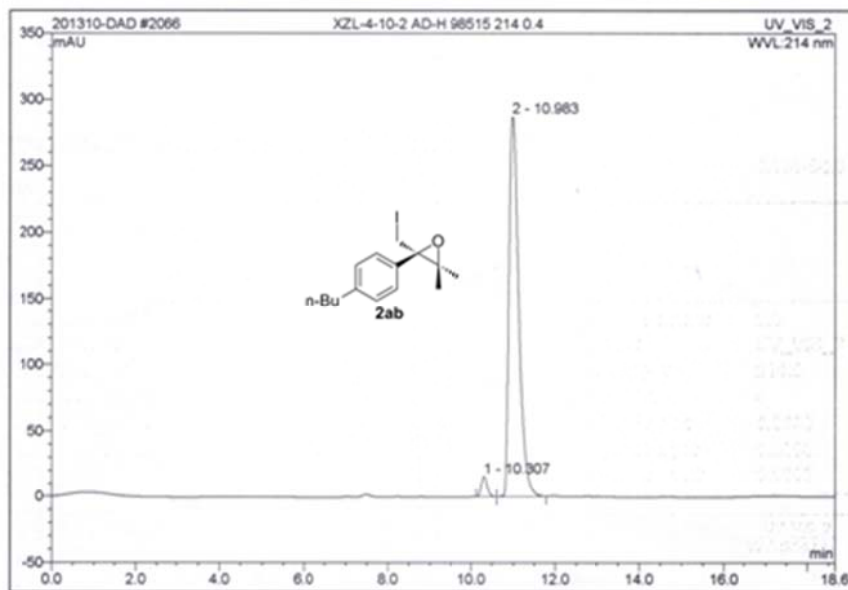

| No.           | Ret.Time min | Peak Name | Height mAU | Area mAU*min | Rel.Area % | Amount | Type |
|---------------|--------------|-----------|------------|--------------|------------|--------|------|
| 1             | 10.31        | n.a.      | 15.920     | 2.682        | 3.36       | n.a.   | BMB  |
| 2             | 10.98        | n.a.      | 287.141    | 77.081       | 96.64      | n.a.   | BMB  |
| <b>Total:</b> |              |           | 303.062    | 79.763       | 100.00     | 0.000  |      |



2090 SZG-3-79-1+- PC-3 982 214 0.5

|                  |                               |                   |          |
|------------------|-------------------------------|-------------------|----------|
| Sample Name:     | SZG-3-79-1+- PC-3 982 214 0.5 | Injection Volume: | 1.0      |
| Vial Number:     | GB5                           | Channel:          | UV_VIS_2 |
| Sample Type:     | unknown                       | Wavelength:       | 214.0    |
| Control Program: | test-dad2                     | Bandwidth:        | 4        |
| Quantif. Method: | WXL                           | Dilution Factor:  | 1.0000   |
| Recording Time:  | 2014-5-28 9:55                | Sample Weight:    | 1.0000   |
| Run Time (min):  | 13.18                         | Sample Amount:    | 1.0000   |

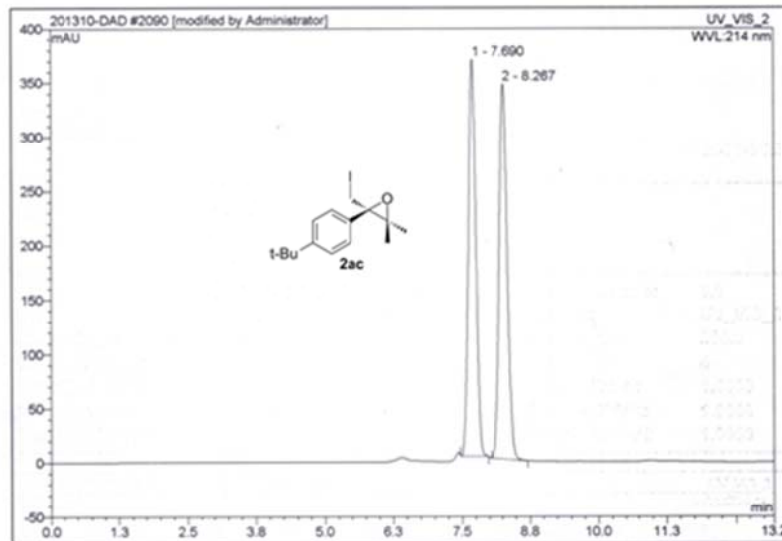

| No.           | Ret. Time<br>min | Peak Name | Height<br>mAU | Area<br>mAU*min | Rel. Area<br>% | Amount | Type |
|---------------|------------------|-----------|---------------|-----------------|----------------|--------|------|
| 1             | 7.69             | n.a.      | 365.988       | 58.532          | 49.77          | n.a.   | MB*  |
| 2             | 8.27             | n.a.      | 345.874       | 59.082          | 50.23          | n.a.   | BMB  |
| <b>Total:</b> |                  |           | 711.863       | 117.614         | 100.00         | 0.000  |      |

**2091 SZG-4-10-3 PC-3 982 214 0.5**

|                  |                             |                   |          |
|------------------|-----------------------------|-------------------|----------|
| Sample Name:     | SZG-4-10-3 PC-3 982 214 0.5 | Injection Volume: | 1.0      |
| Vial Number:     | GB6                         | Channel:          | UV_VIS_2 |
| Sample Type:     | unknown                     | Wavelength:       | 214.0    |
| Control Program: | test-dad2                   | Bandwidth:        | 4        |
| Quantif. Method: | WXL                         | Dilution Factor:  | 1.0000   |
| Recording Time:  | 2014-5-28 10:10             | Sample Weight:    | 1.0000   |
| Run Time (min):  | 11.29                       | Sample Amount:    | 1.0000   |

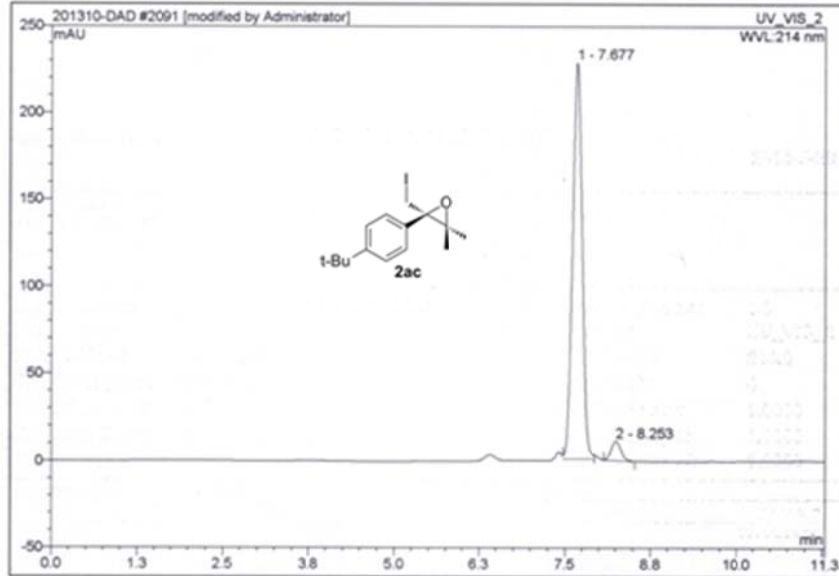

| No.           | Ret. Time<br>min | Peak Name | Height<br>mAU | Area<br>mAU*min | Rel. Area<br>% | Amount | Type |
|---------------|------------------|-----------|---------------|-----------------|----------------|--------|------|
| 1             | 7.68             | n.a.      | 227.619       | 36.677          | 95.38          | n.a.   | M *  |
| 2             | 8.25             | n.a.      | 10.888        | 1.778           | 4.62           | n.a.   | BMB  |
| <b>Total:</b> |                  |           | 238.508       | 38.455          | 100.00         | 0.000  |      |

**775 SXG-4-4-2-1+- ID3 982 214 0.7**

|                  |                               |                   |          |
|------------------|-------------------------------|-------------------|----------|
| Sample Name:     | SXG-4-4-2-1+- ID3 982 214 0.7 | Injection Volume: | 1.0      |
| Vial Number:     | RB3                           | Channel:          | UV_VIS_1 |
| Sample Type:     | unknown                       | Wavelength:       | 214      |
| Control Program: | WXL-2014-1                    | Bandwidth:        | n.a.     |
| Quantif. Method: | WXL                           | Dilution Factor:  | 1.0000   |
| Recording Time:  | 2014/6/9 12:03                | Sample Weight:    | 1.0000   |
| Run Time (min):  | 11.69                         | Sample Amount:    | 1.0000   |

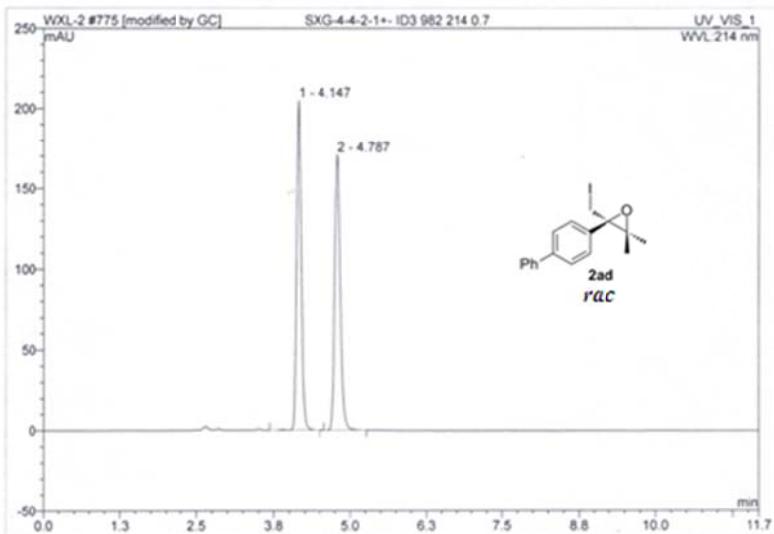

| No.           | Ret.Time<br>min | Peak Name | Height<br>mAU | Area<br>mAU*min | Rel.Area<br>% | Amount | Type |
|---------------|-----------------|-----------|---------------|-----------------|---------------|--------|------|
| 1             | 4.15            | n.a.      | 204.836       | 17.718          | 49.76         | n.a.   | BMB* |
| 2             | 4.79            | n.a.      | 170.788       | 17.892          | 50.24         | n.a.   | BMB* |
| <b>Total:</b> |                 |           | 375.624       | 35.610          | 100.00        | 0.000  |      |

## 776 SXG-4-20-2 ID3 982 214 0.7

|                  |                            |                   |          |
|------------------|----------------------------|-------------------|----------|
| Sample Name:     | SXG-4-20-2 ID3 982 214 0.7 | Injection Volume: | 1.0      |
| Vial Number:     | RB4                        | Channel:          | UV_VIS_1 |
| Sample Type:     | unknown                    | Wavelength:       | 214      |
| Control Program: | WXL-2014-1                 | Bandwidth:        | n.a.     |
| Quantif. Method: | WXL                        | Dilution Factor:  | 1.0000   |
| Recording Time:  | 2014/6/9 12:20             | Sample Weight:    | 1.0000   |
| Run Time (min):  | 6.39                       | Sample Amount:    | 1.0000   |

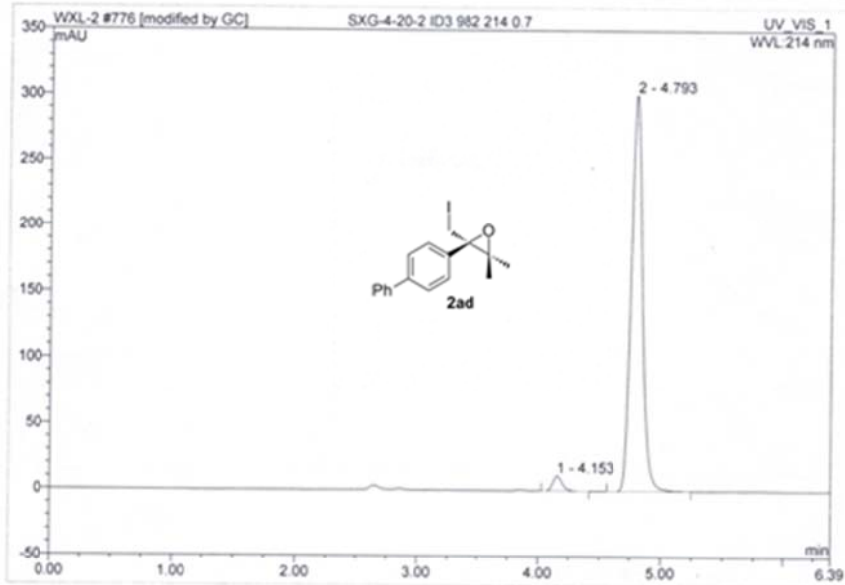

| No.           | Ret.Time min | Peak Name | Height mAU | Area mAU*min | Rel.Area % | Amount | Type |
|---------------|--------------|-----------|------------|--------------|------------|--------|------|
| 1             | 4.15         | n.a.      | 11.532     | 0.995        | 3.04       | n.a.   | BMB* |
| 2             | 4.79         | n.a.      | 301.235    | 31.703       | 96.96      | n.a.   | BMB* |
| <b>Total:</b> |              |           | 312.767    | 32.698       | 100.00     | 0.000  |      |

**1870 SZG-3-75-2 PC-4 982 214 0.7**

|                  |                             |                   |          |
|------------------|-----------------------------|-------------------|----------|
| Sample Name:     | SZG-3-75-2 PC-4 982 214 0.7 | Injection Volume: | 1.0      |
| Vial Number:     | RE4                         | Channel:          | UV_VIS_2 |
| Sample Type:     | unknown                     | Wavelength:       | 214.0    |
| Control Program: | test-dad2                   | Bandwidth:        | 4        |
| Quantif. Method: | WXL                         | Dilution Factor:  | 1.0000   |
| Recording Time:  | 2014-5-4 17:19              | Sample Weight:    | 1.0000   |
| Run Time (min):  | 25.00                       | Sample Amount:    | 1.0000   |

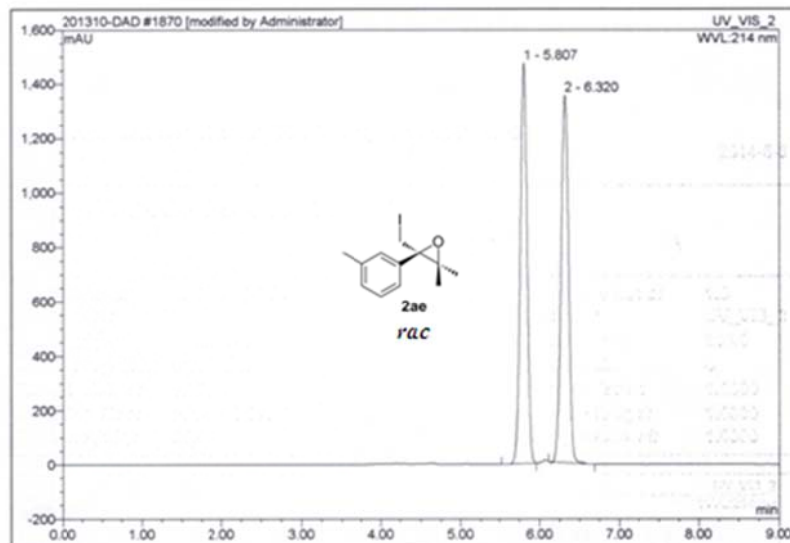

| No.           | Ret. Time<br>min | Peak Name | Height<br>mAU | Area<br>mAU*min | Rel. Area<br>% | Amount | Type |
|---------------|------------------|-----------|---------------|-----------------|----------------|--------|------|
| 1             | 5.81             | n.a.      | 1473.593      | 144.733         | 49.91          | n.a.   | BMB* |
| 2             | 6.32             | n.a.      | 1352.302      | 145.268         | 50.09          | n.a.   | BMB* |
| <b>Total:</b> |                  |           | 2825.896      | 290.001         | 100.00         | 0.000  |      |

**669 SZG-4-10-4 PC-4 982 214 0.7**

|                  |                             |                   |          |
|------------------|-----------------------------|-------------------|----------|
| Sample Name:     | SZG-4-10-4 PC-4 982 214 0.7 | Injection Volume: | 1.0      |
| Vial Number:     | GE1                         | Channel:          | UV_VIS_1 |
| Sample Type:     | unknown                     | Wavelength:       | 214      |
| Control Program: | WXL-2014-1                  | Bandwidth:        | n.a.     |
| Quantif. Method: | WXL                         | Dilution Factor:  | 1.0000   |
| Recording Time:  | 2014/5/26 19:10             | Sample Weight:    | 1.0000   |
| Run Time (min):  | 25.00                       | Sample Amount:    | 1.0000   |

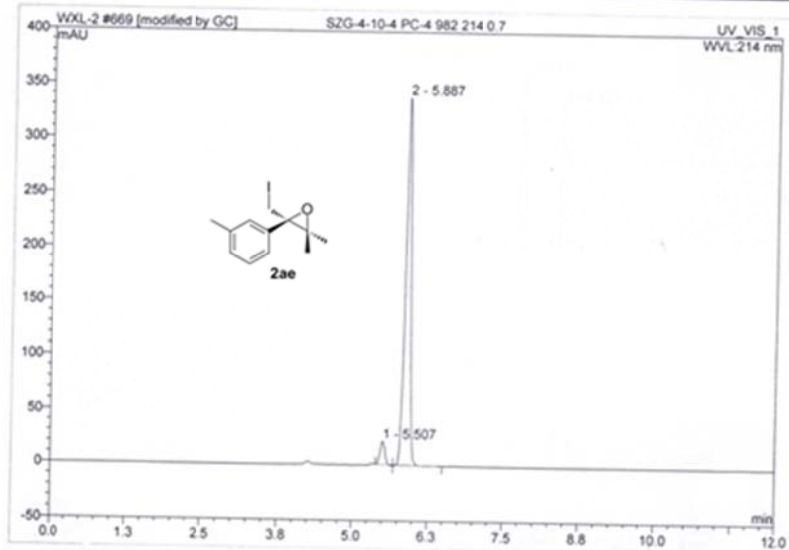

| No.           | Ret. Time<br>min | Peak Name | Height<br>mAU | Area<br>mAU*min | Rel. Area<br>% | Amount | Type |
|---------------|------------------|-----------|---------------|-----------------|----------------|--------|------|
| 1             | 5.51             | n.a.      | 21.627        | 1.932           | 5.25           | n.a.   | BM*  |
| 2             | 5.89             | n.a.      | 339.386       | 34.870          | 94.75          | n.a.   | MB*  |
| <b>Total:</b> |                  |           | 361.013       | 36.802          | 100.00         | 0.000  |      |

**2162 SZG-3-75-3+- OD-H 982 214 0.7**

|                  |                               |                   |          |
|------------------|-------------------------------|-------------------|----------|
| Sample Name:     | SZG-3-75-3+- OD-H 982 214 0.7 | Injection Volume: | 8.0      |
| Vial Number:     | GE5                           | Channel:          | UV_VIS_2 |
| Sample Type:     | unknown                       | Wavelength:       | 214.0    |
| Control Program: | test-dad                      | Bandwidth:        | 4        |
| Quantif. Method: | WXL                           | Dilution Factor:  | 1.0000   |
| Recording Time:  | 2014-6-4 12:38                | Sample Weight:    | 1.0000   |
| Run Time (min):  | 16.26                         | Sample Amount:    | 1.0000   |

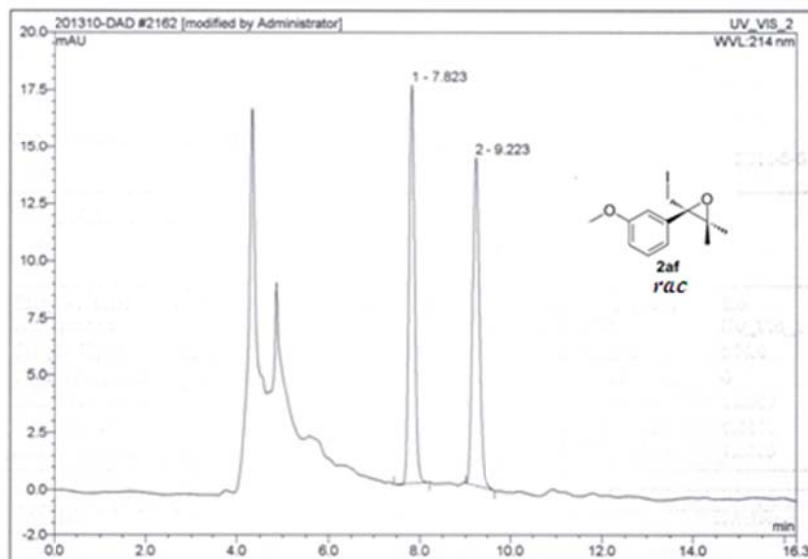

| No.           | Ret.Time<br>min | Peak Name | Height<br>mAU | Area<br>mAU*min | Rel.Area<br>% | Amount | Type |
|---------------|-----------------|-----------|---------------|-----------------|---------------|--------|------|
| 1             | 7.82            | n.a.      | 17.433        | 2.495           | 49.99         | n.a.   | BMB* |
| 2             | 9.22            | n.a.      | 14.342        | 2.496           | 50.01         | n.a.   | BMB  |
| <b>Total:</b> |                 |           | 31.775        | 4.991           | 100.00        | 0.000  |      |

2163 SZG-4-15-5 OD-H 982 214 0.7

|                  |                             |                   |          |
|------------------|-----------------------------|-------------------|----------|
| Sample Name:     | SZG-4-15-5 OD-H 982 214 0.7 | Injection Volume: | 1.0      |
| Vial Number:     | GE2                         | Channel:          | UV_VIS_2 |
| Sample Type:     | unknown                     | Wavelength:       | 214.0    |
| Control Program: | test-dad                    | Bandwidth:        | 4        |
| Quantif. Method: | WXL                         | Dilution Factor:  | 1.0000   |
| Recording Time:  | 2014-6-4 13:34              | Sample Weight:    | 1.0000   |
| Run Time (min):  | 13.47                       | Sample Amount:    | 1.0000   |

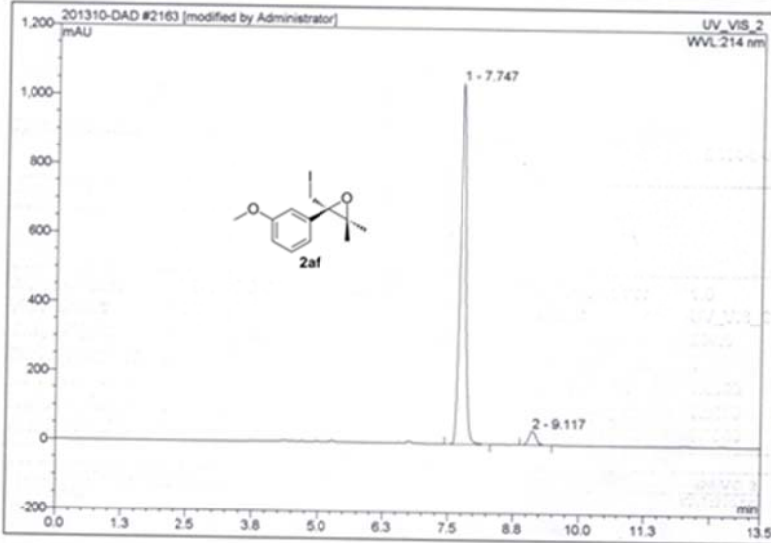

| No.           | Ret. Time<br>min | Peak Name | Height<br>mAU | Area<br>mAU*min | Rel. Area<br>% | Amount | Type |
|---------------|------------------|-----------|---------------|-----------------|----------------|--------|------|
| 1             | 7.75             | n.a.      | 1043.776      | 144.473         | 95.58          | n.a.   | BMB* |
| 2             | 9.12             | n.a.      | 40.516        | 6.680           | 4.42           | n.a.   | BMB  |
| <b>Total:</b> |                  |           | 1084.292      | 151.153         | 100.00         | 0.000  |      |

91%  
dome



**732 3-75-1+- AD-H 98515 214 0.4 18**

|                  |                                |                   |          |
|------------------|--------------------------------|-------------------|----------|
| Sample Name:     | 3-75-1+- AD-H 98515 214 0.4 18 | Injection Volume: | 1.0      |
| Vial Number:     | GA1                            | Channel:          | UV_VIS_1 |
| Sample Type:     | unknown                        | Wavelength:       | 214      |
| Control Program: | WXL-2014-1                     | Bandwidth:        | n.a.     |
| Quantif. Method: | WXL                            | Dilution Factor:  | 1.0000   |
| Recording Time:  | 2014/6/4 11:12                 | Sample Weight:    | 1.0000   |
| Run Time (min):  | 25.01                          | Sample Amount:    | 1.0000   |

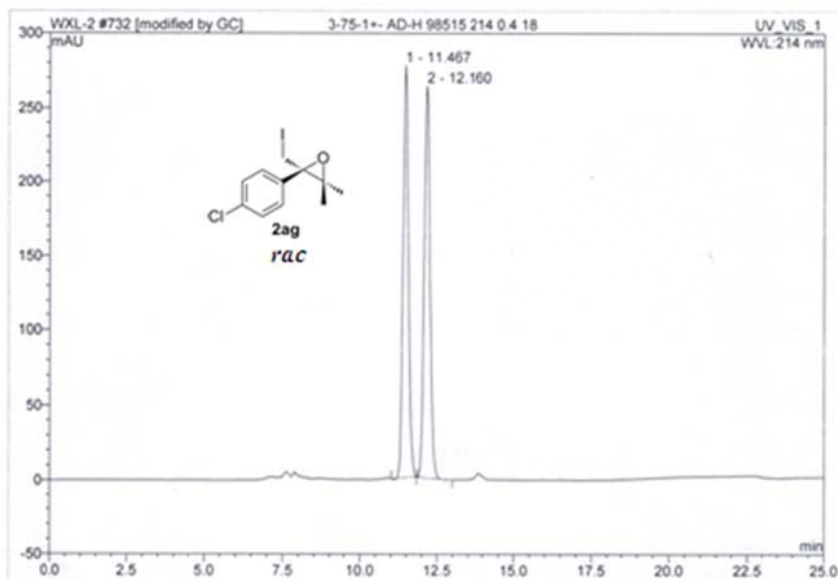

| No.           | Ret.Time<br>min | Peak Name | Height<br>mAU | Area<br>mAU*min | Rel.Area<br>% | Amount | Type |
|---------------|-----------------|-----------|---------------|-----------------|---------------|--------|------|
| 1             | 11.47           | n.a.      | 276.589       | 56.874          | 49.90         | n.a.   | BMB* |
| 2             | 12.16           | n.a.      | 263.099       | 57.091          | 50.10         | n.a.   | BMB* |
| <b>Total:</b> |                 |           | 539.688       | 113.965         | 100.00        | 0.000  |      |

**733 SZG-4-15-2 AD-H 98515 214 0.4 18**

|                  |                                  |                   |          |
|------------------|----------------------------------|-------------------|----------|
| Sample Name:     | SZG-4-15-2 AD-H 98515 214 0.4 18 | Injection Volume: | 1.0      |
| Vial Number:     | GA5                              | Channel:          | UV_VIS_1 |
| Sample Type:     | unknown                          | Wavelength:       | 214      |
| Control Program: | WXL-2014-1                       | Bandwidth:        | n.a.     |
| Quantif. Method: | WXL                              | Dilution Factor:  | 1.0000   |
| Recording Time:  | 2014/6/4 12:04                   | Sample Weight:    | 1.0000   |
| Run Time (min):  | 25.00                            | Sample Amount:    | 1.0000   |

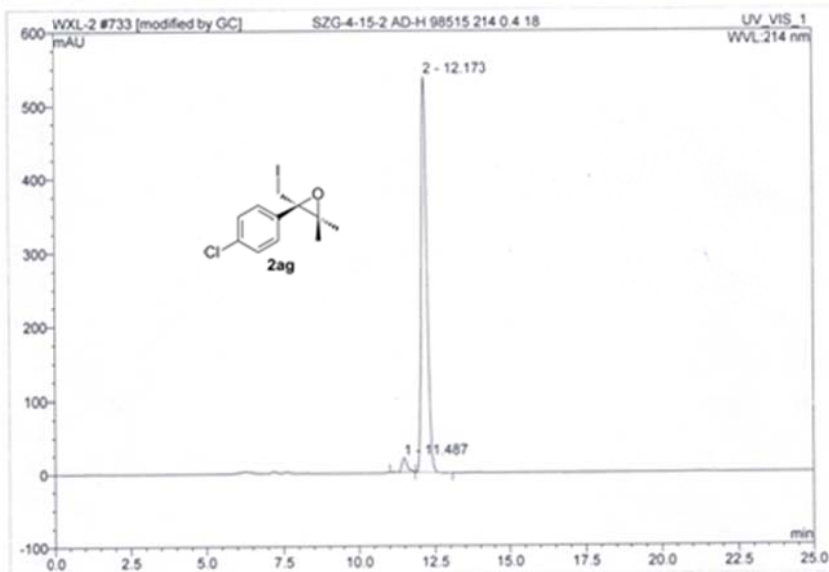

| No.           | Ret. Time<br>min | Peak Name | Height<br>mAU | Area<br>mAU*min | Ref. Area<br>% | Amount | Type |
|---------------|------------------|-----------|---------------|-----------------|----------------|--------|------|
| 1             | 11.49            | n.a.      | 19.735        | 4.111           | 3.48           | n.a.   | BMB* |
| 2             | 12.17            | n.a.      | 537.701       | 113.865         | 96.52          | n.a.   | BMB* |
| <b>Total:</b> |                  |           | 557.436       | 117.976         | 100.00         | 0.000  |      |

93%

|                                        |                             |                   |          |
|----------------------------------------|-----------------------------|-------------------|----------|
| <b>736 3-88-5+- ID3 982 214 0.4 18</b> |                             |                   |          |
| Sample Name:                           | 3-88-5+- ID3 982 214 0.4 18 | Injection Volume: | 2.0      |
| Vial Number:                           | GA3                         | Channel:          | UV_VIS_1 |
| Sample Type:                           | unknown                     | Wavelength:       | 214      |
| Control Program:                       | WXL-2014-1                  | Bandwidth:        | n.a.     |
| Quantif. Method:                       | WXL                         | Dilution Factor:  | 1.0000   |
| Recording Time:                        | 2014/6/3 19:41              | Sample Weight:    | 1.0000   |
| Run Time (min):                        | 25.00                       | Sample Amount:    | 1.0000   |

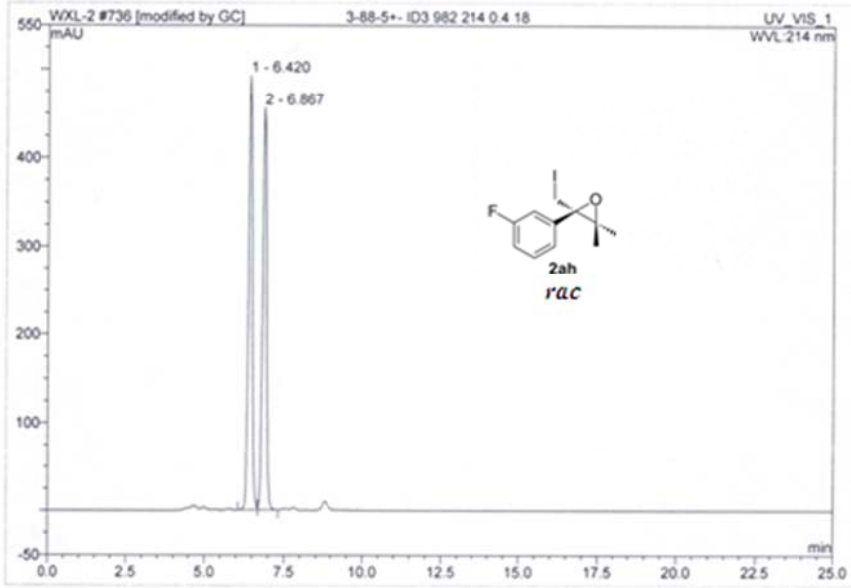

| No.           | Ret.Time min | Peak Name | Height mAU | Area mAU*min | Rel.Area % | Amount | Type |
|---------------|--------------|-----------|------------|--------------|------------|--------|------|
| 1             | 6.42         | n.a.      | 492.835    | 68.150       | 50.73      | n.a.   | BM*  |
| 2             | 6.87         | n.a.      | 456.294    | 66.197       | 49.27      | n.a.   | MB*  |
| <b>Total:</b> |              |           | 949.129    | 134.347      | 100.00     | 0.000  |      |

**738 SZG-4-15-3 ID3 982 214 0.4 18**

|                  |                               |                   |          |
|------------------|-------------------------------|-------------------|----------|
| Sample Name:     | SZG-4-15-3 ID3 982 214 0.4 18 | Injection Volume: | 1.0      |
| Vial Number:     | GA5                           | Channel:          | UV_VIS_1 |
| Sample Type:     | unknown                       | Wavelength:       | 214      |
| Control Program: | WXL-2014-1                    | Bandwidth:        | n.a.     |
| Quantif. Method: | WXL                           | Dilution Factor:  | 1.0000   |
| Recording Time:  | 2014/6/4 10:13                | Sample Weight:    | 1.0000   |
| Run Time (min):  | 12.19                         | Sample Amount:    | 1.0000   |

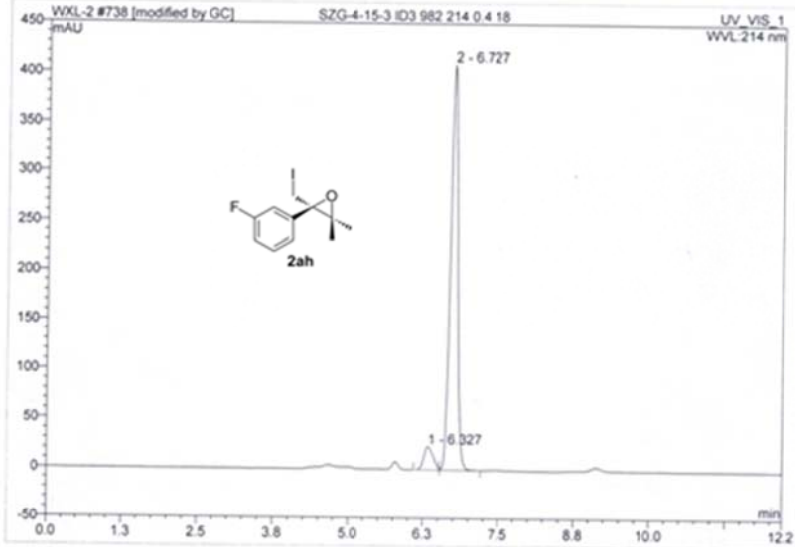

| No.           | Ret.Time min | Peak Name | Height mAU | Area mAU*min | Rel.Area % | Amount | Type |
|---------------|--------------|-----------|------------|--------------|------------|--------|------|
| 1             | 6.33         | n.a.      | 23.487     | 4.228        | 6.84       | n.a.   | BM*  |
| 2             | 6.73         | n.a.      | 410.099    | 57.544       | 93.16      | n.a.   | MB*  |
| <b>Total:</b> |              |           | 433.586    | 61.772       | 100.00     | 0.000  |      |

87%

## 2642 SZG-4-2-1+- IC 982 214 0.7

|                  |                            |                   |          |
|------------------|----------------------------|-------------------|----------|
| Sample Name:     | SZG-4-2-1+- IC 982 214 0.7 | Injection Volume: | 1.0      |
| Vial Number:     | BD4                        | Channel:          | UV_VIS_2 |
| Sample Type:     | unknown                    | Wavelength:       | 214.0    |
| Control Program: | test-dad2                  | Bandwidth:        | 4        |
| Quantif. Method: | WXL                        | Dilution Factor:  | 1.0000   |
| Recording Time:  | 2014-8-11 9:13             | Sample Weight:    | 1.0000   |
| Run Time (min):  | 10.18                      | Sample Amount:    | 1.0000   |

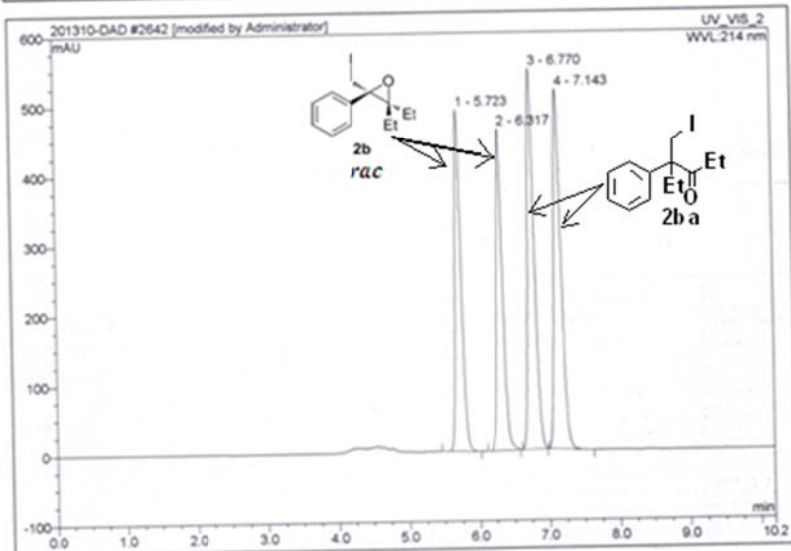

| No.           | Ret.Time<br>min | Peak Name | Height<br>mAU | Area<br>mAU*min | Rel.Area<br>% | Amount | Type |
|---------------|-----------------|-----------|---------------|-----------------|---------------|--------|------|
| 1             | 5.72            | n.a.      | 490.068       | 49.723          | 22.29         | n.a.   | BMB* |
| 2             | 6.32            | n.a.      | 461.636       | 49.323          | 22.11         | n.a.   | BMB* |
| 3             | 6.77            | n.a.      | 546.193       | 61.573          | 27.60         | n.a.   | BMB* |
| 4             | 7.14            | n.a.      | 516.511       | 62.466          | 28.00         | n.a.   | BMB* |
| <b>Total:</b> |                 |           | 2014.407      | 223.086         | 100.00        | 0.000  |      |

**2643 SZG-4-19-1 IC 982 214 0.7**

|                  |                           |                   |          |
|------------------|---------------------------|-------------------|----------|
| Sample Name:     | SZG-4-19-1 IC 982 214 0.7 | Injection Volume: | 1.0      |
| Vial Number:     | BD5                       | Channel:          | UV_VIS_2 |
| Sample Type:     | unknown                   | Wavelength:       | 214.0    |
| Control Program: | test-dad2                 | Bandwidth:        | 4        |
| Quantif. Method: | WXL                       | Dilution Factor:  | 1.0000   |
| Recording Time:  | 2014-8-11 8:52            | Sample Weight:    | 1.0000   |
| Run Time (min):  | 19.95                     | Sample Amount:    | 1.0000   |

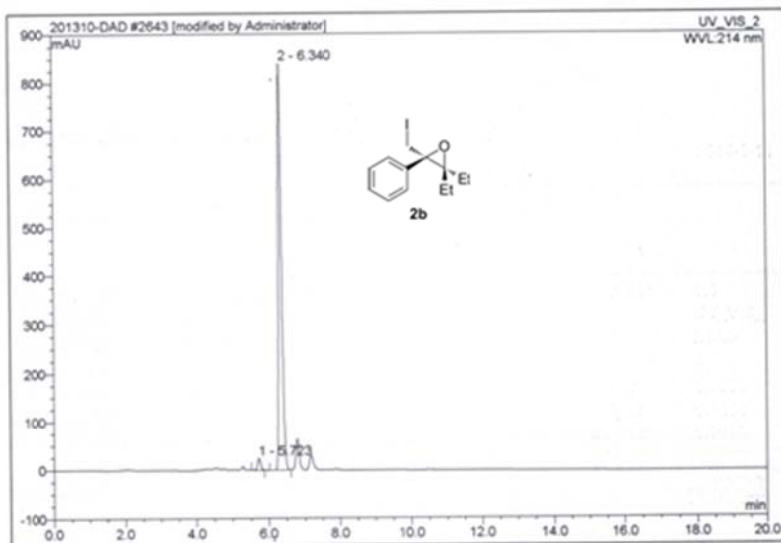

| No.           | Ret. Time<br>min | Peak Name | Height<br>mAU | Area<br>mAU*min | Rel. Area<br>% | Amount | Type |
|---------------|------------------|-----------|---------------|-----------------|----------------|--------|------|
| 1             | 5.72             | n.a.      | 24.099        | 2.350           | 2.54           | n.a.   | BMB* |
| 2             | 6.34             | n.a.      | 841.147       | 90.222          | 97.46          | n.a.   | BMB* |
| <b>Total:</b> |                  |           | 865.246       | 92.572          | 100.00         | 0.000  |      |

**1031 SZG-4-5-1-1+- OD-H 982 214 0.7**

|                  |                                |                   |          |
|------------------|--------------------------------|-------------------|----------|
| Sample Name:     | SZG-4-5-1-1+- OD-H 982 214 0.7 | Injection Volume: | 1.0      |
| Vial Number:     | GB2                            | Channel:          | UV_VIS_1 |
| Sample Type:     | unknown                        | Wavelength:       | 214      |
| Control Program: | WXL-2014-1                     | Bandwidth:        | n.a.     |
| Quantif. Method: | WXL                            | Dilution Factor:  | 1.0000   |
| Recording Time:  | 2014/7/4 17:46                 | Sample Weight:    | 1.0000   |
| Run Time (min):  | 23.11                          | Sample Amount:    | 1.0000   |

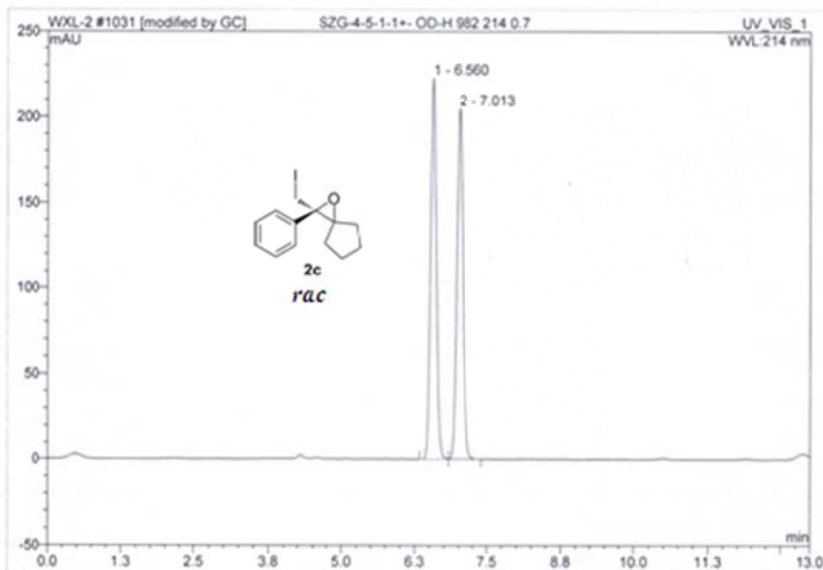

| No.           | Ret.Time<br>min | Peak Name | Height<br>mAU | Area<br>mAU*min | Rel.Area<br>% | Amount | Type |
|---------------|-----------------|-----------|---------------|-----------------|---------------|--------|------|
| 1             | 6.56            | n.a.      | 223.051       | 25.621          | 50.10         | n.a.   | BM*  |
| 2             | 7.01            | n.a.      | 205.056       | 25.516          | 49.90         | n.a.   | MB*  |
| <b>Total:</b> |                 |           | 428.107       | 51.137          | 100.00        | 0.000  |      |

**2189 SZG-4-19-3 OD-H 982 214 0.7**

|                  |                             |                   |          |
|------------------|-----------------------------|-------------------|----------|
| Sample Name:     | SZG-4-19-3 OD-H 982 214 0.7 | Injection Volume: | 1.0      |
| Vial Number:     | GD3                         | Channel:          | UV_VIS_2 |
| Sample Type:     | unknown                     | Wavelength:       | 214.0    |
| Control Program: | test-dad                    | Bandwidth:        | 4        |
| Quantif. Method: | WXL                         | Dilution Factor:  | 1.0000   |
| Recording Time:  | 2014-6-5 14:30              | Sample Weight:    | 1.0000   |
| Run Time (min):  | 14.05                       | Sample Amount:    | 1.0000   |

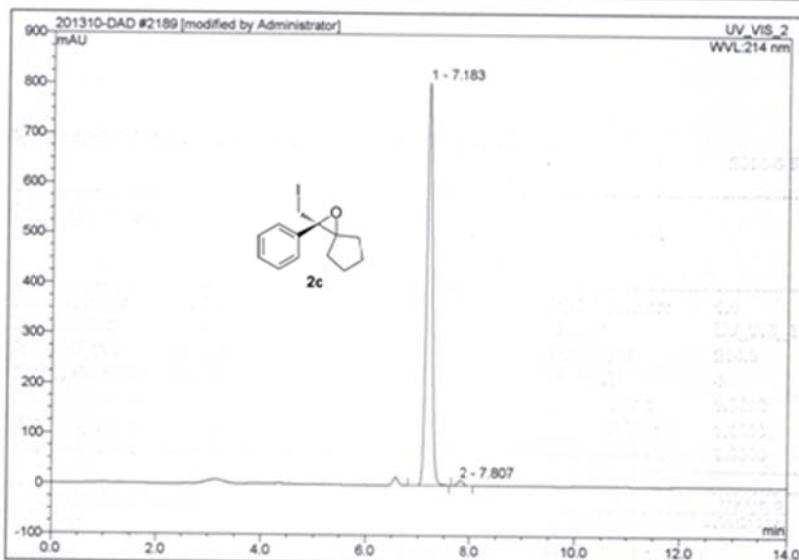

| No.           | Ret. Time<br>min | Peak Name | Height<br>mAU | Area<br>mAU*min | Rel. Area<br>% | Amount | Type |
|---------------|------------------|-----------|---------------|-----------------|----------------|--------|------|
| 1             | 7.18             | n.a.      | 805.280       | 99.745          | 98.69          | n.a.   | BMB* |
| 2             | 7.81             | n.a.      | 9.842         | 1.321           | 1.31           | n.a.   | BMB* |
| <b>Total:</b> |                  |           | 815.122       | 101.067         | 100.00         | 0.000  |      |



**1411 SZG-5-24 OD-H 982 214 0.7**

|                  |                           |                   |          |
|------------------|---------------------------|-------------------|----------|
| Sample Name:     | SZG-5-24 OD-H 982 214 0.7 | Injection Volume: | 1.0      |
| Vial Number:     | GD1                       | Channel:          | UV_VIS_1 |
| Sample Type:     | unknown                   | Wavelength:       | 214      |
| Control Program: | WXL-2014-2                | Bandwidth:        | n.a.     |
| Quantif. Method: | WXL                       | Dilution Factor:  | 1.0000   |
| Recording Time:  | 2014/9/3 9:06             | Sample Weight:    | 1.0000   |
| Run Time (min):  | 21.55                     | Sample Amount:    | 1.0000   |

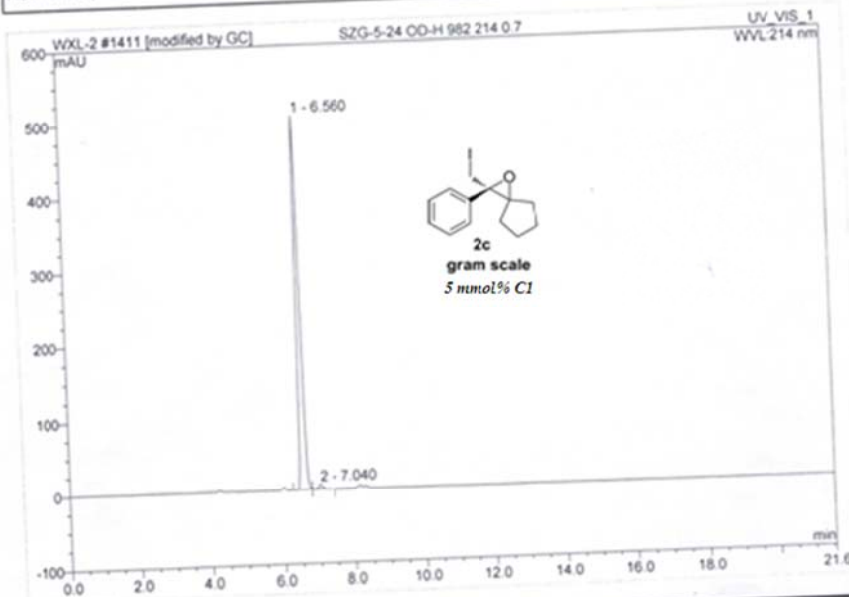

| No.           | Ret. Time min | Peak Name | Height mAU | Area mAU*min | Rel. Area % | Amount | Type |
|---------------|---------------|-----------|------------|--------------|-------------|--------|------|
| 1             | 6.56          | n.a.      | 504.943    | 58.458       | 98.80       | n.a.   | BMB* |
| 2             | 7.04          | n.a.      | 6.532      | 0.712        | 1.20        | n.a.   | bMB* |
| <b>Total:</b> |               |           | 511.475    | 59.170       | 100.00      | 0.000  |      |

**5134 SZG-8-29-1 OD-H 982 214 0.7**

|                  |                             |                   |          |
|------------------|-----------------------------|-------------------|----------|
| Sample Name:     | SZG-8-29-1 OD-H 982 214 0.7 | Injection Volume: | 3.0      |
| Vial Number:     | RD4                         | Channel:          | UV_VIS_2 |
| Sample Type:     | unknown                     | Wavelength:       | 214.0    |
| Control Program: | test-dad                    | Bandwidth:        | 4        |
| Quantif. Method: | WXL                         | Dilution Factor:  | 1.0000   |
| Recording Time:  | 2015-5-4 10:46              | Sample Weight:    | 1.0000   |
| Run Time (min):  | 14.01                       | Sample Amount:    | 1.0000   |

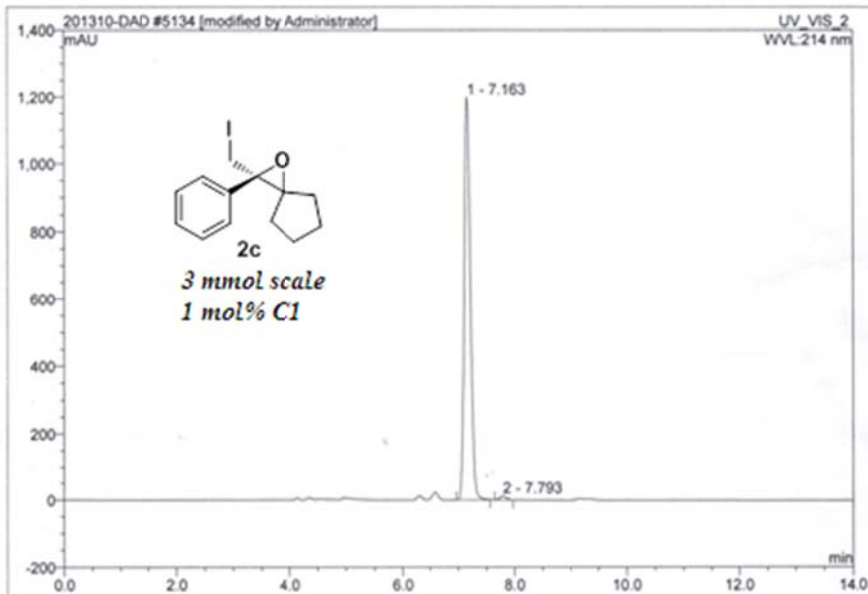

| No.           | Ret.Time<br>min | Peak Name | Height<br>mAU | Area<br>mAU*min | Rel.Area<br>% | Amount | Type |
|---------------|-----------------|-----------|---------------|-----------------|---------------|--------|------|
| 1             | 7.16            | n.a.      | 1199.808      | 151.440         | 98.83         | n.a.   | BM * |
| 2             | 7.79            | n.a.      | 12.715        | 1.788           | 1.17          | n.a.   | M *  |
| <b>Total:</b> |                 |           | 1212.523      | 153.228         | 100.00        | 0.000  |      |

**2356 SZG-4-39-3+- PC-4 955 214 0.7**

|                  |                               |                   |          |
|------------------|-------------------------------|-------------------|----------|
| Sample Name:     | SZG-4-39-3+- PC-4 955 214 0.7 | Injection Volume: | 2.0      |
| Vial Number:     | GD3                           | Channel:          | UV_VIS_2 |
| Sample Type:     | unknown                       | Wavelength:       | 214.0    |
| Control Program: | test-dad2                     | Bandwidth:        | 4        |
| Quantif. Method: | WXL                           | Dilution Factor:  | 1.0000   |
| Recording Time:  | 2014-6-27 15:33               | Sample Weight:    | 1.0000   |
| Run Time (min):  | 11.82                         | Sample Amount:    | 1.0000   |

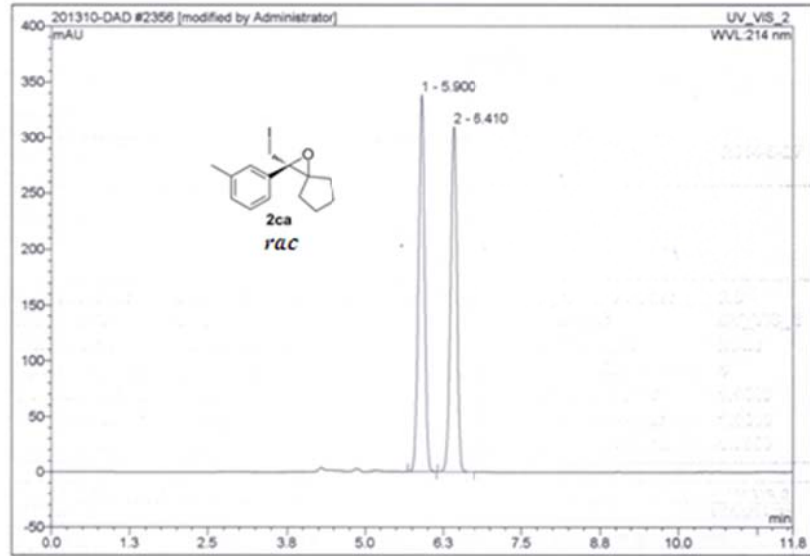

| No.           | Ret.Time<br>min | Peak Name | Height<br>mAU | Area<br>mAU*min | Rel.Area<br>% | Amount | Type |
|---------------|-----------------|-----------|---------------|-----------------|---------------|--------|------|
| 1             | 5.90            | n.a.      | 338.631       | 38.413          | 51.36         | n.a.   | BMB* |
| 2             | 6.41            | n.a.      | 310.429       | 36.375          | 48.64         | n.a.   | BMB* |
| <b>Total:</b> |                 |           | 649.060       | 74.787          | 100.00        | 0.000  |      |

**2357 SZG-4-40-3 PC-4 955 214 0.7**

|                  |                             |                   |          |
|------------------|-----------------------------|-------------------|----------|
| Sample Name:     | SZG-4-40-3 PC-4 955 214 0.7 | Injection Volume: | 2.0      |
| Vial Number:     | GD4                         | Channel:          | UV_VIS_2 |
| Sample Type:     | unknown                     | Wavelength:       | 214.0    |
| Control Program: | test-dad2                   | Bandwidth:        | 4        |
| Quantif. Method: | WXL                         | Dilution Factor:  | 1.0000   |
| Recording Time:  | 2014-6-27 15:46             | Sample Weight:    | 1.0000   |
| Run Time (min):  | 11.33                       | Sample Amount:    | 1.0000   |

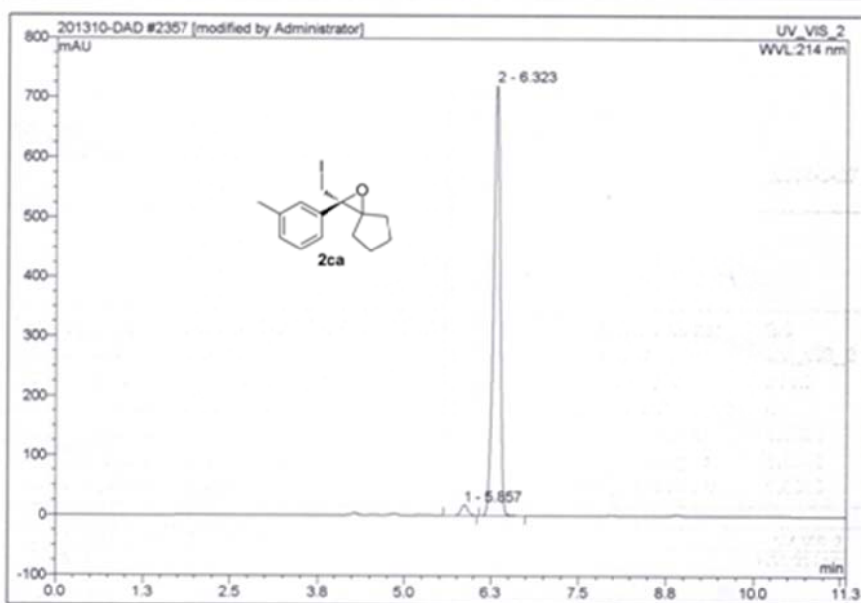

| No.           | Ret.Time<br>min | Peak Name | Height<br>mAU | Area<br>mAU*min | Rel.Area<br>% | Amount | Type |
|---------------|-----------------|-----------|---------------|-----------------|---------------|--------|------|
| 1             | 5.86            | n.a.      | 17.726        | 2.107           | 2.56          | n.a.   | BMB* |
| 2             | 6.32            | n.a.      | 720.618       | 80.155          | 97.44         | n.a.   | BMB* |
| <b>Total:</b> |                 |           | 738.344       | 82.262          | 100.00        | 0.000  |      |

## 2340 SZG-4-39-2+- PC-4 982 214 0.7

|                  |                               |                   |          |
|------------------|-------------------------------|-------------------|----------|
| Sample Name:     | SZG-4-39-2+- PC-4 982 214 0.7 | Injection Volume: | 1.0      |
| Vial Number:     | GD1                           | Channel:          | UV_VIS_2 |
| Sample Type:     | unknown                       | Wavelength:       | 214.0    |
| Control Program: | test-dad2                     | Bandwidth:        | 4        |
| Quantif. Method: | WXL                           | Dilution Factor:  | 1.0000   |
| Recording Time:  | 2014-6-26 11:10               | Sample Weight:    | 1.0000   |
| Run Time (min):  | 15.00                         | Sample Amount:    | 1.0000   |

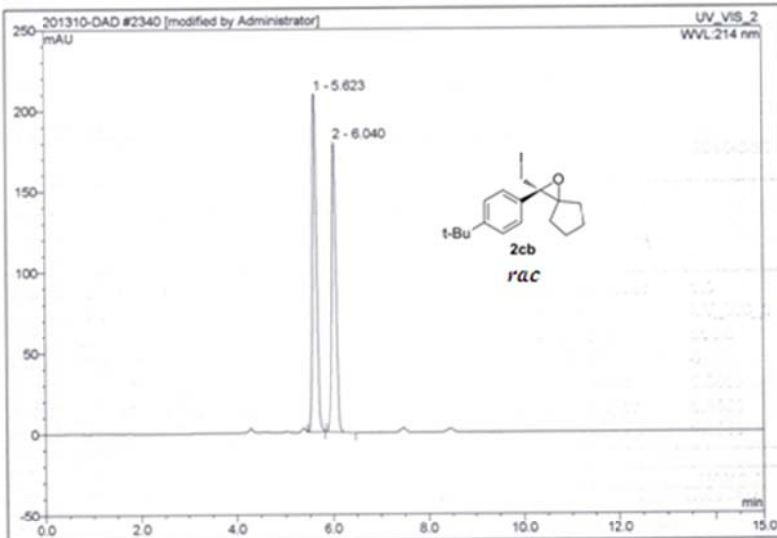

| No.           | Ret. Time<br>min | Peak Name | Height<br>mAU | Area<br>mAU*min | Rel.Area<br>% | Amount | Type |
|---------------|------------------|-----------|---------------|-----------------|---------------|--------|------|
| 1             | 5.62             | n.a.      | 209.253       | 20.455          | 51.65         | n.a.   | BMB* |
| 2             | 6.04             | n.a.      | 179.776       | 19.146          | 48.35         | n.a.   | BMB* |
| <b>Total:</b> |                  |           | 389.029       | 39.601          | 100.00        | 0.000  |      |

**2341 SZG-4-40-2 PC-4 982 214 0.7**

|                  |                             |                   |          |
|------------------|-----------------------------|-------------------|----------|
| Sample Name:     | SZG-4-40-2 PC-4 982 214 0.7 | Injection Volume: | 1.0      |
| Vial Number:     | GD2                         | Channel:          | UV_VIS_2 |
| Sample Type:     | unknown                     | Wavelength:       | 214.0    |
| Control Program: | test-dad2                   | Bandwidth:        | 4        |
| Quantif. Method: | WXL                         | Dilution Factor:  | 1.0000   |
| Recording Time:  | 2014-6-26 11:26             | Sample Weight:    | 1.0000   |
| Run Time (min):  | 11.58                       | Sample Amount:    | 1.0000   |

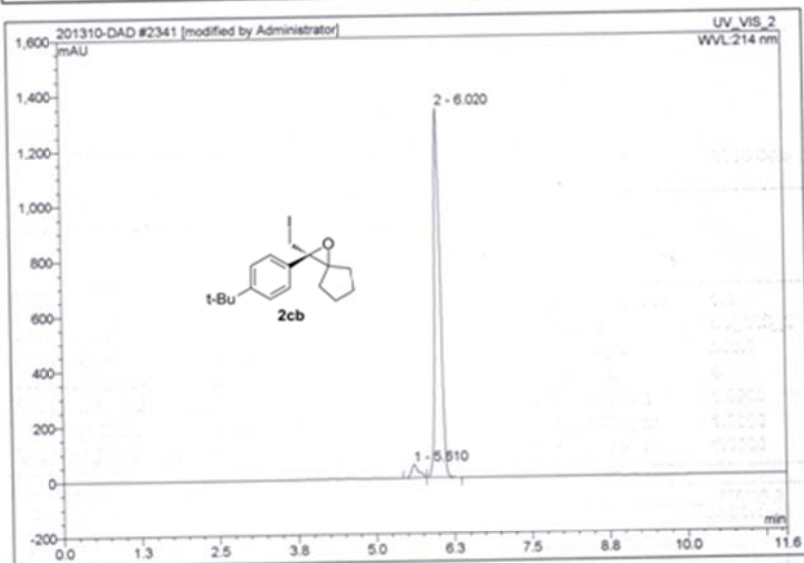

| No.           | Ret. Time<br>min | Peak Name | Height<br>mAU   | Area<br>mAU*min | Rel. Area<br>% | Amount       | Type |
|---------------|------------------|-----------|-----------------|-----------------|----------------|--------------|------|
| 1             | 5.61             | n.a.      | 47.390          | 6.116           | 4.07           | n.a.         | BMB* |
| 2             | 6.02             | n.a.      | 1337.188        | 144.196         | 95.93          | n.a.         | bMB* |
| <b>Total:</b> |                  |           | <b>1384.578</b> | <b>150.312</b>  | <b>100.00</b>  | <b>0.000</b> |      |

**2366 SZG-4-50-5+- PC-4 982 214 0.7**

|                  |                               |                   |          |
|------------------|-------------------------------|-------------------|----------|
| Sample Name:     | SZG-4-50-5+- PC-4 982 214 0.7 | Injection Volume: | 2.0      |
| Vial Number:     | GD5                           | Channel:          | UV_VIS_2 |
| Sample Type:     | unknown                       | Wavelength:       | 214.0    |
| Control Program: | test-dad2                     | Bandwidth:        | 4        |
| Quantif. Method: | WXL                           | Dilution Factor:  | 1.0000   |
| Recording Time:  | 2014-6-30 10:56               | Sample Weight:    | 1.0000   |
| Run Time (min):  | 12.00                         | Sample Amount:    | 1.0000   |

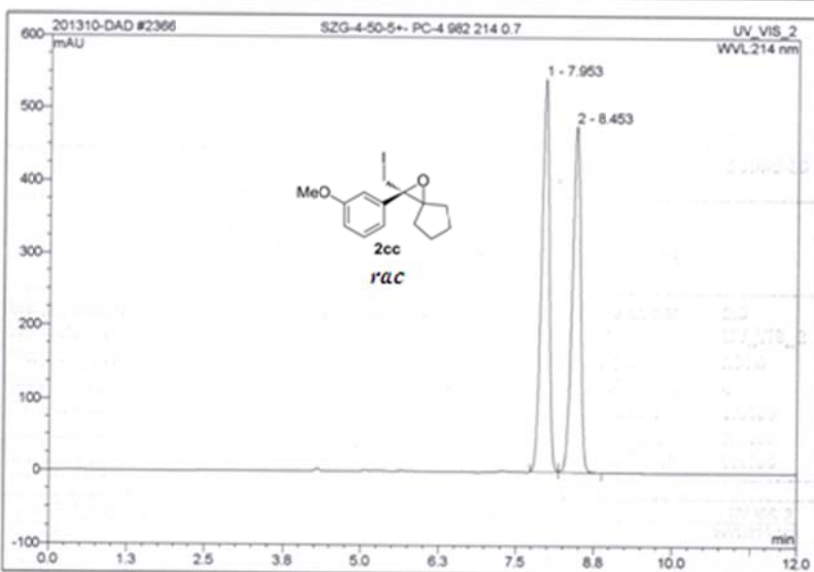

| No.           | Ret. Time<br>min | Peak Name | Height<br>mAU | Area<br>mAU*min | Rel. Area<br>% | Amount | Type |
|---------------|------------------|-----------|---------------|-----------------|----------------|--------|------|
| 1             | 7.95             | n.a.      | 542.318       | 77.625          | 51.33          | n.a.   | BM   |
| 2             | 8.45             | n.a.      | 476.972       | 73.603          | 48.67          | n.a.   | MB   |
| <b>Total:</b> |                  |           | 1019.289      | 151.228         | 100.00         | 0.000  |      |

2367 SZG-4-85-5 PC-4 982 214 0.7

|                  |                             |                   |          |
|------------------|-----------------------------|-------------------|----------|
| Sample Name:     | SZG-4-85-5 PC-4 982 214 0.7 | Injection Volume: | 1.0      |
| Vial Number:     | GD6 48                      | Channel:          | UV_VIS_2 |
| Sample Type:     | unknown                     | Wavelength:       | 214.0    |
| Control Program: | test-dad2                   | Bandwidth:        | 4        |
| Quantif. Method: | WXL                         | Dilution Factor:  | 1.0000   |
| Recording Time:  | 2014-6-30 11:09             | Sample Weight:    | 1.0000   |
| Run Time (min):  | 12.00                       | Sample Amount:    | 1.0000   |

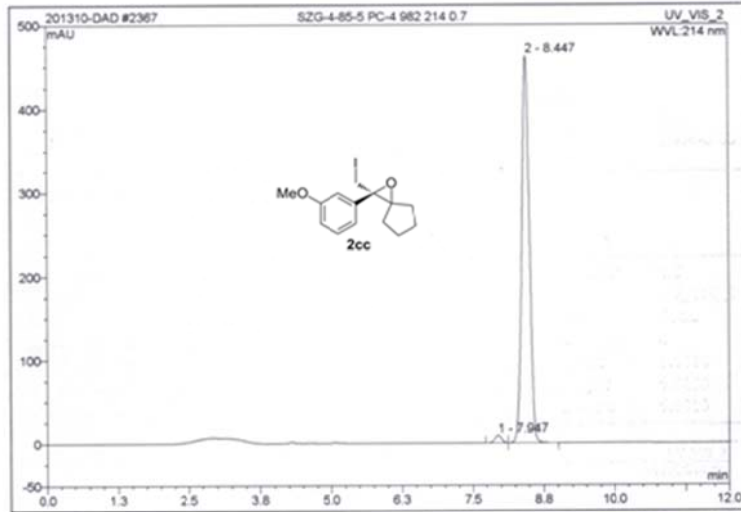

| No.           | Ret. Time<br>min | Peak Name | Height<br>mAU | Area<br>mAU*min | Rel. Area<br>% | Amount | Type |
|---------------|------------------|-----------|---------------|-----------------|----------------|--------|------|
| 1             | 7.95             | n.a.      | 9.002         | 1.262           | 1.76           | n.a.   | BM   |
| 2             | 8.45             | n.a.      | 461.872       | 71.398          | 98.24          | n.a.   | MB   |
| <b>Total:</b> |                  |           | 470.874       | 72.660          | 100.00         | 0.000  |      |



**2343 SZG-4-39-4+ PC-4 982 214 0.7**

|                  |                              |                   |          |
|------------------|------------------------------|-------------------|----------|
| Sample Name:     | SZG-4-39-4+ PC-4 982 214 0.7 | Injection Volume: | 1.0      |
| Vial Number:     | GD3                          | Channel:          | UV_VIS_2 |
| Sample Type:     | unknown                      | Wavelength:       | 214.0    |
| Control Program: | test-dad2                    | Bandwidth:        | 4        |
| Quantif. Method: | WXL                          | Dilution Factor:  | 1.0000   |
| Recording Time:  | 2014-6-26 11:40              | Sample Weight:    | 1.0000   |
| Run Time (min):  | 15.00                        | Sample Amount:    | 1.0000   |

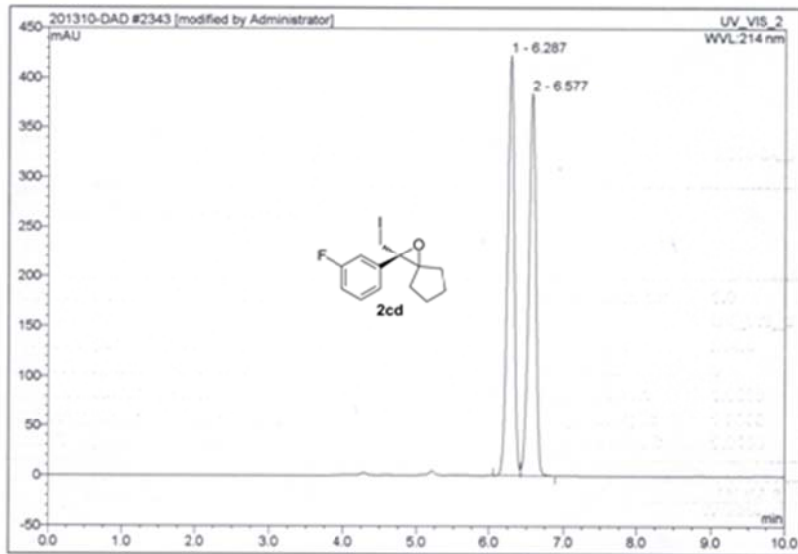

| No.           | Ret. Time<br>min | Peak Name | Height<br>mAU | Area<br>mAU*min | Rel. Area<br>% | Amount | Type |
|---------------|------------------|-----------|---------------|-----------------|----------------|--------|------|
| 1             | 6.29             | n.a.      | 422.662       | 44.806          | 50.90          | n.a.   | BM * |
| 2             | 6.58             | n.a.      | 384.469       | 43.228          | 49.10          | n.a.   | MB * |
| <b>Total:</b> |                  |           | 807.131       | 88.034          | 100.00         | 0.000  |      |

**2344 SZG-4-40-4 PC-4 982 214 0.7**

|                  |                             |                   |          |
|------------------|-----------------------------|-------------------|----------|
| Sample Name:     | SZG-4-40-4 PC-4 982 214 0.7 | Injection Volume: | 1.0      |
| Vial Number:     | GD4                         | Channel:          | UV_VIS_2 |
| Sample Type:     | unknown                     | Wavelength:       | 214.0    |
| Control Program: | test-dad2                   | Bandwidth:        | 4        |
| Quantif. Method: | WXL                         | Dilution Factor:  | 1.0000   |
| Recording Time:  | 2014-6-26 12:12             | Sample Weight:    | 1.0000   |
| Run Time (min):  | 15.00                       | Sample Amount:    | 1.0000   |

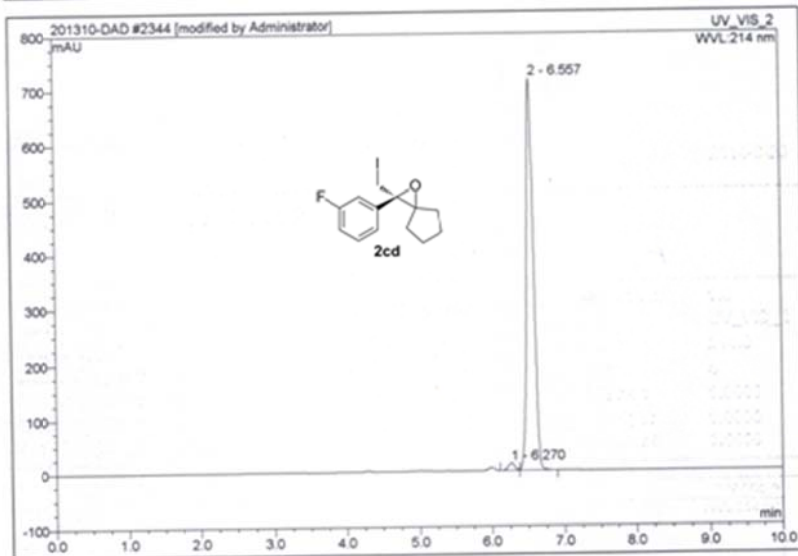

| No.           | Ret. Time<br>min | Peak Name | Height<br>mAU | Area<br>mAU*min | Rel. Area<br>% | Amount | Type |
|---------------|------------------|-----------|---------------|-----------------|----------------|--------|------|
| 1             | 6.27             | n.a.      | 13.988        | 1.448           | 1.77           | n.a.   | BM*  |
| 2             | 6.56             | n.a.      | 716.116       | 80.334          | 98.23          | n.a.   | MB*  |
| <b>Total:</b> |                  |           | 730.104       | 81.782          | 100.00         | 0.000  |      |

**2274 SZG-4-26-2+- PA-2 982 214 0.7**

|                  |                               |                   |          |
|------------------|-------------------------------|-------------------|----------|
| Sample Name:     | SZG-4-26-2+- PA-2 982 214 0.7 | Injection Volume: | 3.0      |
| Vial Number:     | GD1                           | Channel:          | UV_VIS_2 |
| Sample Type:     | unknown                       | Wavelength:       | 214.0    |
| Control Program: | test-dad                      | Bandwidth:        | 4        |
| Quantif. Method: | WXL                           | Dilution Factor:  | 1.0000   |
| Recording Time:  | 2014-6-16 14:25               | Sample Weight:    | 1.0000   |
| Run Time (min):  | 13.44                         | Sample Amount:    | 1.0000   |

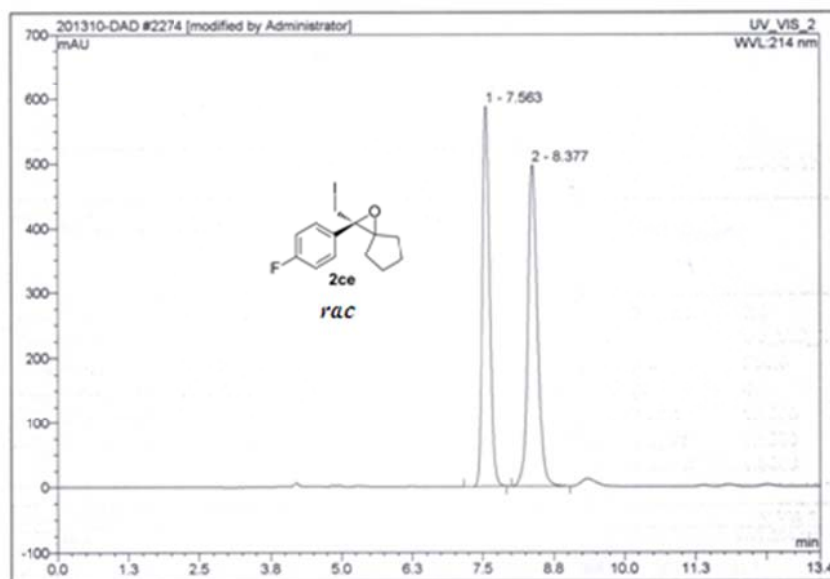

| No.           | Ret.Time<br>min | Peak Name | Height<br>mAU | Area<br>mAU*min | Rel.Area<br>% | Amount | Type |
|---------------|-----------------|-----------|---------------|-----------------|---------------|--------|------|
| 1             | 7.56            | n.a.      | 586.983       | 87.337          | 47.45         | n.a.   | BMB* |
| 2             | 8.38            | n.a.      | 496.722       | 96.711          | 52.55         | n.a.   | BMB* |
| <b>Total:</b> |                 |           | 1083.705      | 184.048         | 100.00        | 0.000  |      |

2275 SZG-4-27-2 PA-2 982 214 0.7

|                  |                             |                   |          |
|------------------|-----------------------------|-------------------|----------|
| Sample Name:     | SZG-4-27-2 PA-2 982 214 0.7 | Injection Volume: | 1.0      |
| Vial Number:     | GD2                         | Channel:          | UV_VIS_2 |
| Sample Type:     | unknown                     | Wavelength:       | 214.0    |
| Control Program: | test-dad                    | Bandwidth:        | 4        |
| Quantif. Method: | WXL                         | Dilution Factor:  | 1.0000   |
| Recording Time:  | 2014-6-16 14:55             | Sample Weight:    | 1.0000   |
| Run Time (min):  | 12.44                       | Sample Amount:    | 1.0000   |

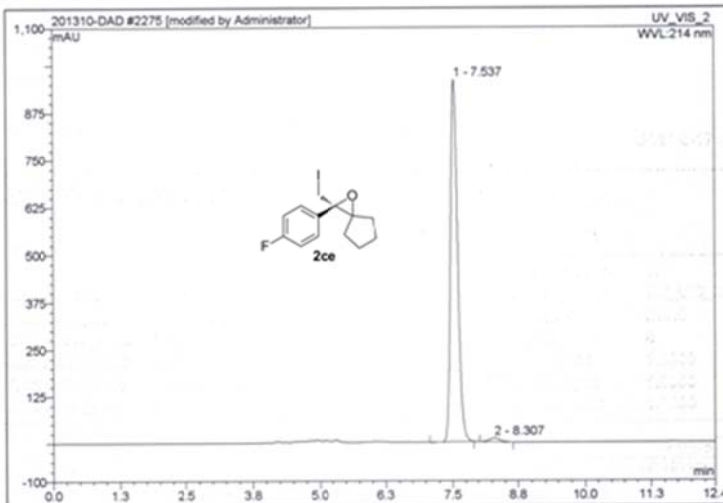

| No.           | Ret.Time<br>min | Peak Name | Height<br>mAU | Area<br>mAU*min | Rel.Area<br>% | Amount | Type |
|---------------|-----------------|-----------|---------------|-----------------|---------------|--------|------|
| 1             | 7.54            | n.a.      | 958.690       | 148.033         | 98.27         | n.a.   | BMB* |
| 2             | 8.31            | n.a.      | 11.152        | 2.603           | 1.73          | n.a.   | BMB  |
| <b>Total:</b> |                 |           | 969.841       | 150.635         | 100.00        | 0.000  |      |

## 2276 SZG-4-26-1+- PA-2 982 214 0.7

|                  |                               |                   |          |
|------------------|-------------------------------|-------------------|----------|
| Sample Name:     | SZG-4-26-1+- PA-2 982 214 0.7 | Injection Volume: | 1.0      |
| Vial Number:     | GD3                           | Channel:          | UV_VIS_2 |
| Sample Type:     | unknown                       | Wavelength:       | 214.0    |
| Control Program: | test-dad                      | Bandwidth:        | 4        |
| Quantif. Method: | WXL                           | Dilution Factor:  | 1.0000   |
| Recording Time:  | 2014-6-16 15:09               | Sample Weight:    | 1.0000   |
| Run Time (min):  | 15.00                         | Sample Amount:    | 1.0000   |

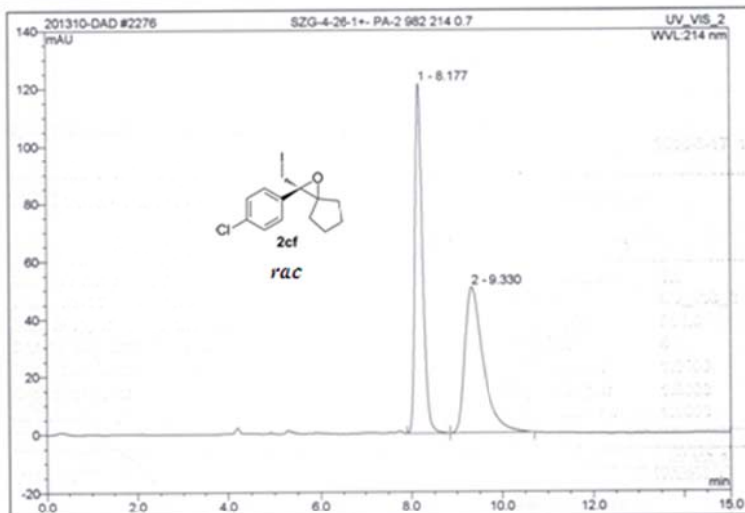

| No.    | Ret. Time<br>min | Peak Name | Height<br>mAU | Area<br>mAU*min | Rel. Area<br>% | Amount | Type |
|--------|------------------|-----------|---------------|-----------------|----------------|--------|------|
| 1      | 8.18             | n.a.      | 121.196       | 23.238          | 49.37          | n.a.   | BM   |
| 2      | 9.33             | n.a.      | 50.555        | 23.833          | 50.63          | n.a.   | MB   |
| Total: |                  |           | 171.750       | 47.071          | 100.00         | 0.000  |      |

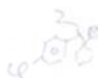

## 2277 SZG-4-27-1 PA-2 982 214 0.7

|                  |                             |                   |          |
|------------------|-----------------------------|-------------------|----------|
| Sample Name:     | SZG-4-27-1 PA-2 982 214 0.7 | Injection Volume: | 1.0      |
| Vial Number:     | GD4                         | Channel:          | UV_VIS_2 |
| Sample Type:     | unknown                     | Wavelength:       | 214.0    |
| Control Program: | test-dad                    | Bandwidth:        | 4        |
| Quantif. Method: | WXL                         | Dilution Factor:  | 1.0000   |
| Recording Time:  | 2014-6-16 15:25             | Sample Weight:    | 1.0000   |
| Run Time (min):  | 14.48                       | Sample Amount:    | 1.0000   |

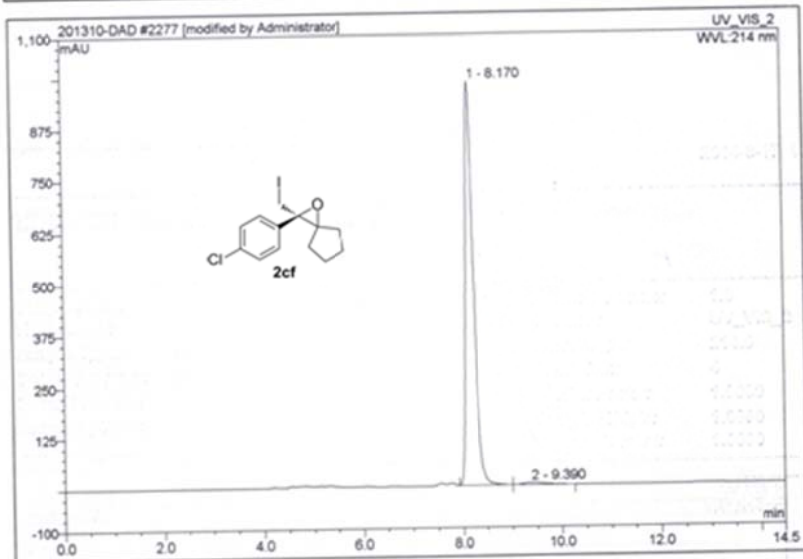

| No.           | Ret. Time<br>min | Peak Name | Height<br>mAU | Area<br>mAU*min | Rel. Area<br>% | Amount | Type |
|---------------|------------------|-----------|---------------|-----------------|----------------|--------|------|
| 1             | 8.17             | n.a.      | 981.711       | 189.818         | 98.82          | n.a.   | BMB  |
| 2             | 9.39             | n.a.      | 4.713         | 2.261           | 1.18           | n.a.   | BMB  |
| <b>Total:</b> |                  |           | 986.425       | 192.078         | 100.00         | 0.000  |      |

**2362 SZG-4-50-2-1+- PC-4 982 214 0.7**

|                  |                                 |                   |          |
|------------------|---------------------------------|-------------------|----------|
| Sample Name:     | SZG-4-50-2-1+- PC-4 982 214 0.7 | Injection Volume: | 2.0      |
| Vial Number:     | GD1                             | Channel:          | UV_VIS_2 |
| Sample Type:     | unknown                         | Wavelength:       | 214.0    |
| Control Program: | test-dad2                       | Bandwidth:        | 4        |
| Quantif. Method: | WXL                             | Dilution Factor:  | 1.0000   |
| Recording Time:  | 2014-6-30 10:05                 | Sample Weight:    | 1.0000   |
| Run Time (min):  | 12.00                           | Sample Amount:    | 1.0000   |

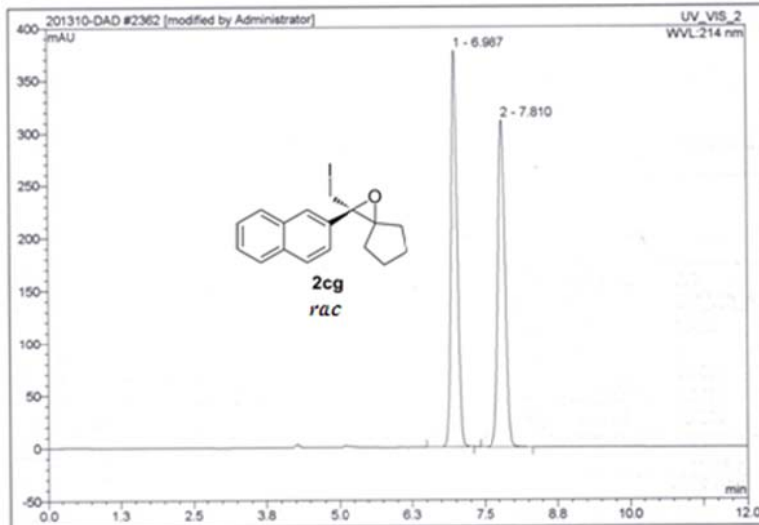

| No.           | Ret.Time<br>min | Peak Name | Height<br>mAU | Area<br>mAU*min | Rel.Area<br>% | Amount | Type |
|---------------|-----------------|-----------|---------------|-----------------|---------------|--------|------|
| 1             | 6.99            | n.a.      | 377.565       | 47.152          | 51.43         | n.a.   | BMB* |
| 2             | 7.81            | n.a.      | 311.745       | 44.523          | 48.57         | n.a.   | BMB* |
| <b>Total:</b> |                 |           | 689.311       | 91.675          | 100.00        | 0.000  |      |

**2363 SZG-4-48-2-1 PC-4 982 214 0.7**

|                  |                               |                   |          |
|------------------|-------------------------------|-------------------|----------|
| Sample Name:     | SZG-4-48-2-1 PC-4 982 214 0.7 | Injection Volume: | 2.0      |
| Vial Number:     | GD2                           | Channel:          | UV_VIS_2 |
| Sample Type:     | unknown                       | Wavelength:       | 214.0    |
| Control Program: | test-dad2                     | Bandwidth:        | 4        |
| Quantif. Method: | WXL                           | Dilution Factor:  | 1.0000   |
| Recording Time:  | 2014-6-30 10:18               | Sample Weight:    | 1.0000   |
| Run Time (min):  | 12.00                         | Sample Amount:    | 1.0000   |

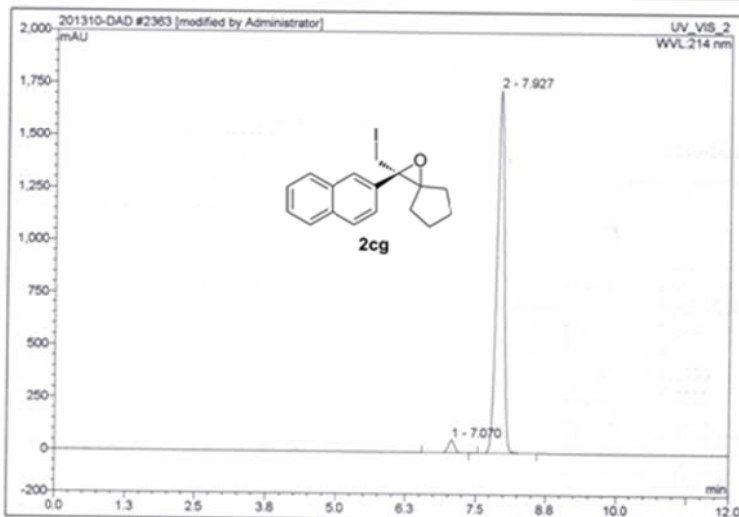

| No.           | Ret.Time min | Peak Name | Height mAU | Area mAU*min | Rel.Area % | Amount | Type |
|---------------|--------------|-----------|------------|--------------|------------|--------|------|
| 1             | 7.07         | n.a.      | 60.426     | 7.759        | 2.91       | n.a.   | BMB* |
| 2             | 7.93         | n.a.      | 1728.793   | 258.881      | 97.09      | n.a.   | BMB* |
| <b>Total:</b> |              |           | 1789.219   | 266.640      | 100.00     | 0.000  |      |



**2364 SZG-4-50-3+- PC-4 982 214 0.7**

|                  |                               |                   |          |
|------------------|-------------------------------|-------------------|----------|
| Sample Name:     | SZG-4-50-3+- PC-4 982 214 0.7 | Injection Volume: | 2.0      |
| Vial Number:     | GD3                           | Channel:          | UV_VIS_2 |
| Sample Type:     | unknown                       | Wavelength:       | 214.0    |
| Control Program: | test-dad2                     | Bandwidth:        | 4        |
| Quantif. Method: | WXL                           | Dilution Factor:  | 1.0000   |
| Recording Time:  | 2014-6-30 10:32               | Sample Weight:    | 1.0000   |
| Run Time (min):  | 10.41                         | Sample Amount:    | 1.0000   |

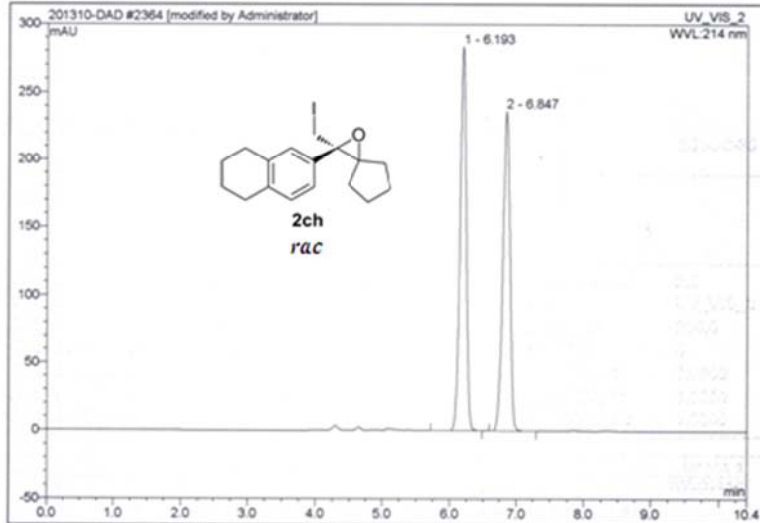

| No.           | Ret. Time<br>min | Peak Name | Height<br>mAU | Area<br>mAU*min | Rel. Area<br>% | Amount | Type |
|---------------|------------------|-----------|---------------|-----------------|----------------|--------|------|
| 1             | 6.19             | n.a.      | 283.671       | 30.700          | 51.40          | n.a.   | BMB* |
| 2             | 6.85             | n.a.      | 236.691       | 29.023          | 48.60          | n.a.   | BMB* |
| <b>Total:</b> |                  |           | 520.361       | 59.722          | 100.00         | 0.000  |      |

**2365 SZG-4-48-3 PC-4 982 214 0.7**

|                  |                             |                   |          |
|------------------|-----------------------------|-------------------|----------|
| Sample Name:     | SZG-4-48-3 PC-4 982 214 0.7 | Injection Volume: | 2.0      |
| Vial Number:     | GD4                         | Channel:          | UV_VIS_2 |
| Sample Type:     | unknown                     | Wavelength:       | 214.0    |
| Control Program: | test-dad2                   | Bandwidth:        | 4        |
| Quantif. Method: | WXL                         | Dilution Factor:  | 1.0000   |
| Recording Time:  | 2014-6-30 10:45             | Sample Weight:    | 1.0000   |
| Run Time (min):  | 9.56                        | Sample Amount:    | 1.0000   |

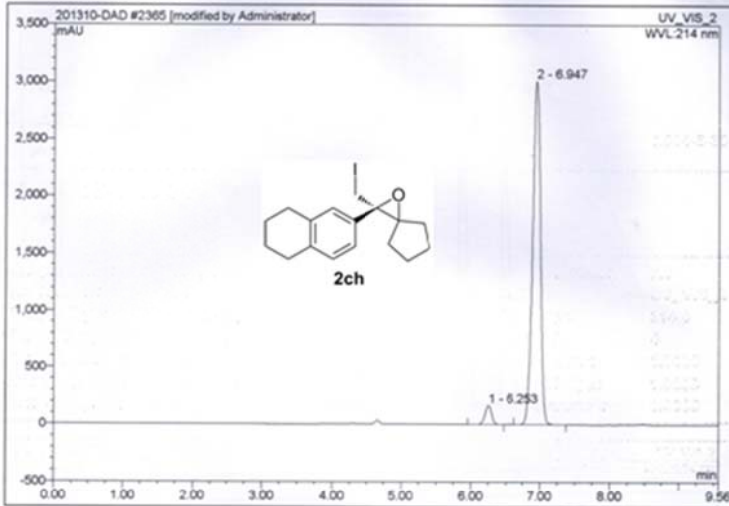

| No.           | Ret.Time<br>min | Peak Name | Height<br>mAU | Area<br>mAU*min | Rel.Area<br>% | Amount | Type |
|---------------|-----------------|-----------|---------------|-----------------|---------------|--------|------|
| 1             | 6.25            | n.a.      | 169.273       | 18.676          | 4.47          | n.a.   | BMB* |
| 2             | 6.95            | n.a.      | 3008.430      | 399.031         | 95.53         | n.a.   | BMB* |
| <b>Total:</b> |                 |           | 3177.703      | 417.707         | 100.00        | 0.000  |      |

## 2191 SZG-3-79-2+- OD-H 982 214 0.7

|                  |                               |                   |          |
|------------------|-------------------------------|-------------------|----------|
| Sample Name:     | SZG-3-79-2+- OD-H 982 214 0.7 | Injection Volume: | 1.0      |
| Vial Number:     | GD2                           | Channel:          | UV_VIS_2 |
| Sample Type:     | unknown                       | Wavelength:       | 214.0    |
| Control Program: | test-dad                      | Bandwidth:        | 4        |
| Quantif. Method: | WXL                           | Dilution Factor:  | 1.0000   |
| Recording Time:  | 2014-6-5 14:46                | Sample Weight:    | 1.0000   |
| Run Time (min):  | 12.54                         | Sample Amount:    | 1.0000   |

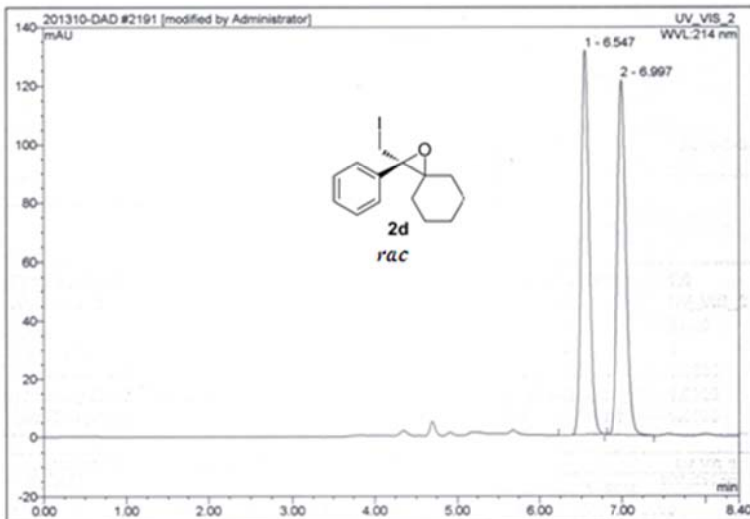

| No.           | Ret. Time<br>min | Peak Name | Height<br>mAU | Area<br>mAU*min | Rel. Area<br>% | Amount | Type |
|---------------|------------------|-----------|---------------|-----------------|----------------|--------|------|
| 1             | 6.55             | n.a.      | 131.402       | 14.799          | 49.94          | n.a.   | BMB* |
| 2             | 7.00             | n.a.      | 121.251       | 14.833          | 50.06          | n.a.   | BMB* |
| <b>Total:</b> |                  |           | 252.653       | 29.632          | 100.00         | 0.000  |      |

**2192 SZG-4-19-4 OD-H 982 214 0.7**

|                  |                             |                   |          |
|------------------|-----------------------------|-------------------|----------|
| Sample Name:     | SZG-4-19-4 OD-H 982 214 0.7 | Injection Volume: | 1.0      |
| Vial Number:     | GD1                         | Channel:          | UV_VIS_2 |
| Sample Type:     | unknown                     | Wavelength:       | 214.0    |
| Control Program: | test-dad                    | Bandwidth:        | 4        |
| Quantif. Method: | WXL                         | Dilution Factor:  | 1.0000   |
| Recording Time:  | 2014-6-5 15:00              | Sample Weight:    | 1.0000   |
| Run Time (min):  | 16.62                       | Sample Amount:    | 1.0000   |

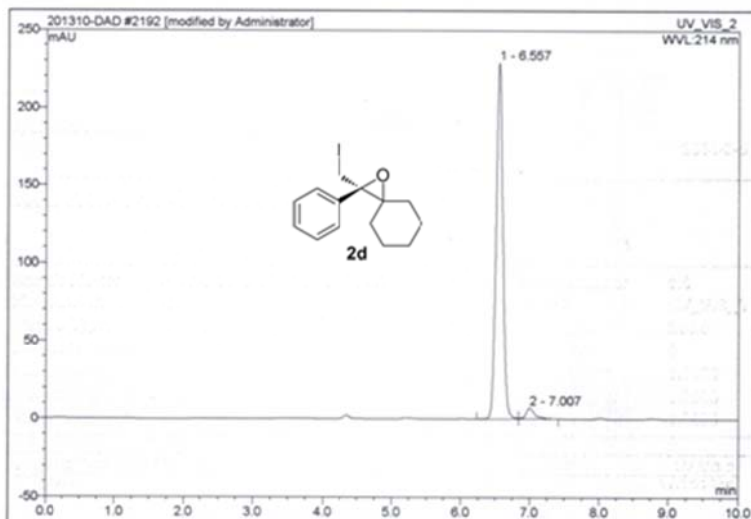

| No.           | Ret. Time<br>min | Peak Name | Height<br>mAU | Area<br>mAU*min | Rel. Area<br>% | Amount | Type |
|---------------|------------------|-----------|---------------|-----------------|----------------|--------|------|
| 1             | 6.56             | n.a.      | 229.120       | 25.943          | 95.91          | n.a.   | BM * |
| 2             | 7.01             | n.a.      | 7.268         | 1.107           | 4.09           | n.a.   | MB*  |
| <b>Total:</b> |                  |           | 236.388       | 27.049          | 100.00         | 0.000  |      |

**1241 SZG-4-86 OD-H 982 214 0.7**

|                  |                           |                   |          |
|------------------|---------------------------|-------------------|----------|
| Sample Name:     | SZG-4-86 OD-H 982 214 0.7 | Injection Volume: | 1.0      |
| Vial Number:     | GC7                       | Channel:          | UV_VIS_1 |
| Sample Type:     | unknown                   | Wavelength:       | 214      |
| Control Program: | WXL-2014-2                | Bandwidth:        | n.a.     |
| Quantif. Method: | WXL                       | Dilution Factor:  | 1.0000   |
| Recording Time:  | 2014/8/11 11:29           | Sample Weight:    | 1.0000   |
| Run Time (min):  | 11.97                     | Sample Amount:    | 1.0000   |

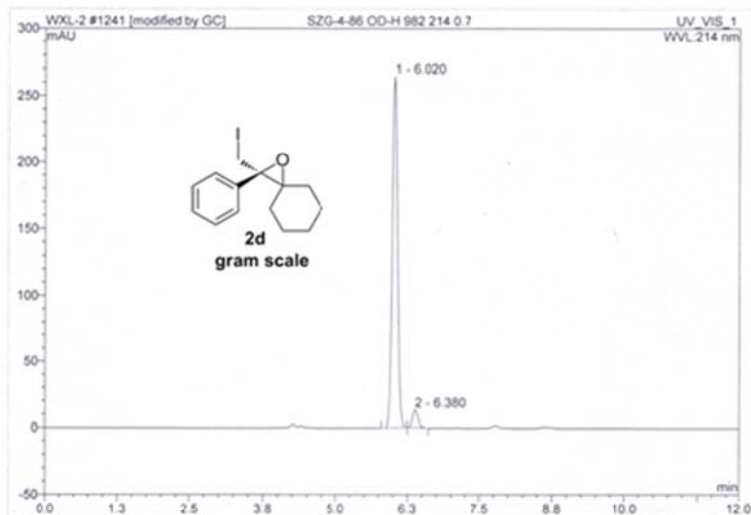

| No.           | Ret.Time<br>min | Peak Name | Height<br>mAU | Area<br>mAU*min | Rel.Area<br>% | Amount | Type |
|---------------|-----------------|-----------|---------------|-----------------|---------------|--------|------|
| 1             | 6.02            | n.a.      | 264.667       | 27.960          | 94.93         | n.a.   | BMB* |
| 2             | 6.38            | n.a.      | 13.428        | 1.495           | 5.07          | n.a.   | bMB* |
| <b>Total:</b> |                 |           | 278.095       | 29.454          | 100.00        | 0.000  |      |

## 1932 SZG-4-2-2+- IC 955 214 0.7

|                  |                            |                   |          |
|------------------|----------------------------|-------------------|----------|
| Sample Name:     | SZG-4-2-2+- IC 955 214 0.7 | Injection Volume: | 1.0      |
| Vial Number:     | RC6                        | Channel:          | UV_VIS_2 |
| Sample Type:     | unknown                    | Wavelength:       | 214.0    |
| Control Program: | test-dad2                  | Bandwidth:        | 4        |
| Quantif. Method: | WXL                        | Dilution Factor:  | 1.0000   |
| Recording Time:  | 2014-5-13 11:16            | Sample Weight:    | 1.0000   |
| Run Time (min):  | 12.00                      | Sample Amount:    | 1.0000   |

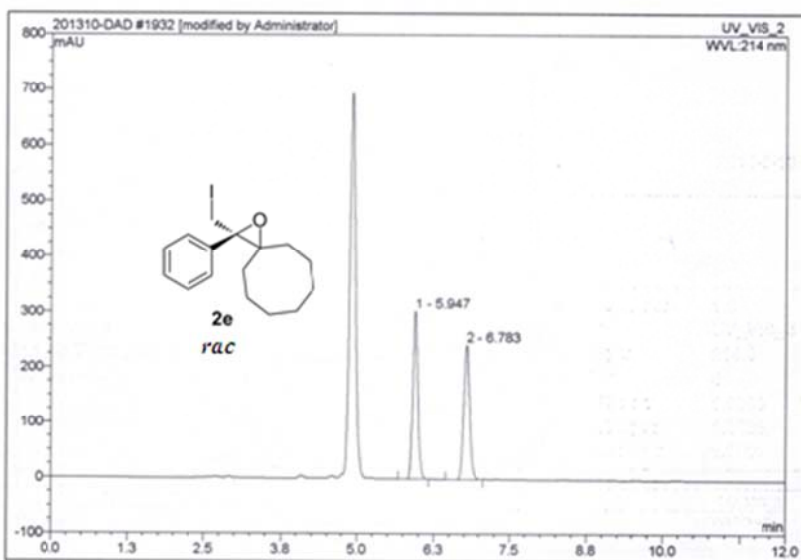

| No.           | Ret. Time<br>min | Peak Name | Height<br>mAU | Area<br>mAU*min | Rel. Area<br>% | Amount | Type |
|---------------|------------------|-----------|---------------|-----------------|----------------|--------|------|
| 1             | 5.95             | n.a.      | 304.751       | 28.867          | 51.64          | n.a.   | BMB* |
| 2             | 6.78             | n.a.      | 244.028       | 27.035          | 48.36          | n.a.   | BMB* |
| <b>Total:</b> |                  |           | 548.779       | 55.902          | 100.00         | 0.000  |      |

**2194 SZG-4-19-5 IC 955 214 0.7**

|                  |                           |                   |          |
|------------------|---------------------------|-------------------|----------|
| Sample Name:     | SZG-4-19-5 IC 955 214 0.7 | Injection Volume: | 0.8      |
| Vial Number:     | GD1                       | Channel:          | UV_VIS_2 |
| Sample Type:     | unknown                   | Wavelength:       | 214.0    |
| Control Program: | test-dad                  | Bandwidth:        | 4        |
| Quantif. Method: | WXL                       | Dilution Factor:  | 1.0000   |
| Recording Time:  | 2014-6-5 15:49            | Sample Weight:    | 1.0000   |
| Run Time (min):  | 10.40                     | Sample Amount:    | 1.0000   |

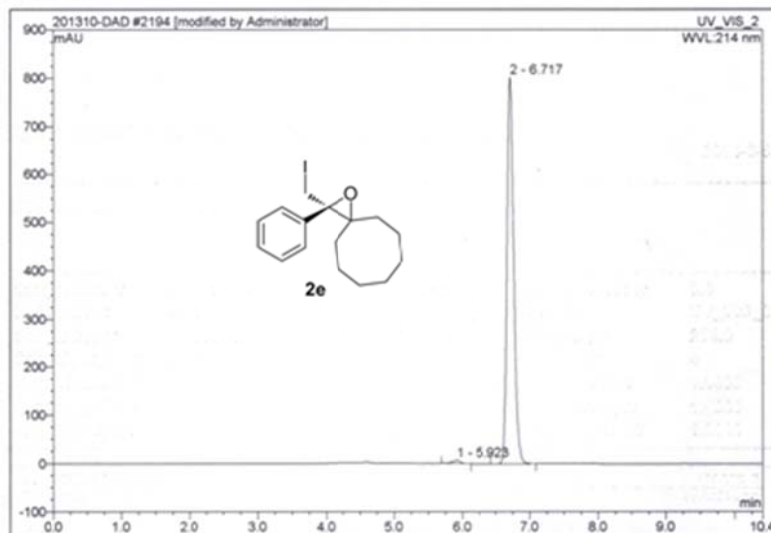

| No.           | Ret.Time<br>min | Peak Name | Height<br>mAU | Area<br>mAU*min | Rel.Area<br>% | Amount | Type |
|---------------|-----------------|-----------|---------------|-----------------|---------------|--------|------|
| 1             | 5.92            | n.a.      | 7.144         | 0.860           | 0.94          | n.a.   | BMB* |
| 2             | 6.72            | n.a.      | 802.576       | 90.544          | 99.06         | n.a.   | BMB* |
| <b>Total:</b> |                 |           | 809.720       | 91.404          | 100.00        | 0.000  |      |

**2648 SZG-4-87 IC 955 214 0.7**

|                  |                         |                   |          |
|------------------|-------------------------|-------------------|----------|
| Sample Name:     | SZG-4-87 IC 955 214 0.7 | Injection Volume: | 1.0      |
| Vial Number:     | BE3                     | Channel:          | UV_VIS_2 |
| Sample Type:     | unknown                 | Wavelength:       | 214.0    |
| Control Program: | test-dad2               | Bandwidth:        | 4        |
| Quantif. Method: | WXL                     | Dilution Factor:  | 1.0000   |
| Recording Time:  | 2014-8-11 11:15         | Sample Weight:    | 1.0000   |
| Run Time (min):  | 12.00                   | Sample Amount:    | 1.0000   |

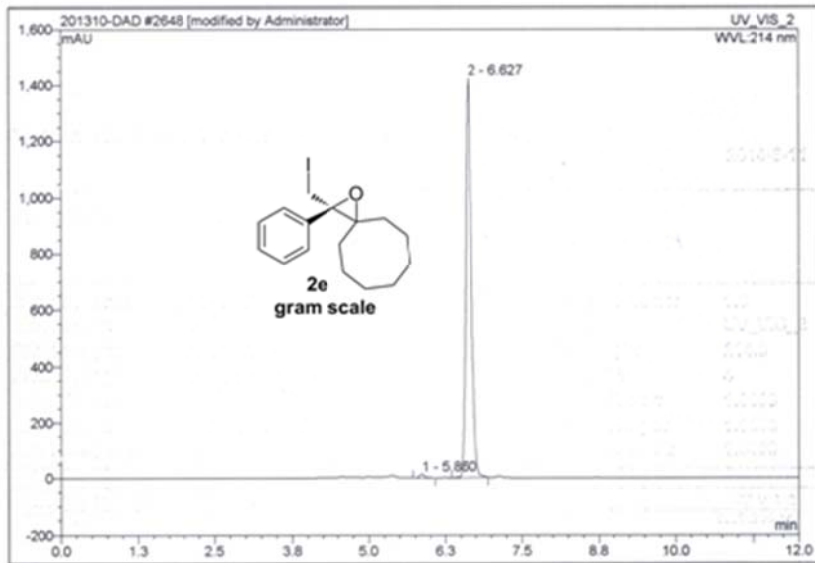

| No.           | Ret. Time<br>min | Peak Name | Height<br>mAU | Area<br>mAU*min | Rel. Area<br>% | Amount | Type |
|---------------|------------------|-----------|---------------|-----------------|----------------|--------|------|
| 1             | 5.86             | n.a.      | 12.885        | 1.238           | 0.77           | n.a.   | BMB* |
| 2             | 6.63             | n.a.      | 1423.477      | 159.318         | 99.23          | n.a.   | BMB* |
| <b>Total:</b> |                  |           | 1436.362      | 160.556         | 100.00         | 0.000  |      |



## 2066 SZG-3-100-2+- AD-H 98515 214 0.7

|                  |                                  |                   |          |
|------------------|----------------------------------|-------------------|----------|
| Sample Name:     | SZG-3-100-2+- AD-H 98515 214 0.7 | Injection Volume: | 5.0      |
| Vial Number:     | GE4                              | Channel:          | UV_VIS_2 |
| Sample Type:     | unknown                          | Wavelength:       | 214.0    |
| Control Program: | test-dad2                        | Bandwidth:        | 4        |
| Quantif. Method: | WXL                              | Dilution Factor:  | 1.0000   |
| Recording Time:  | 2014-5-26 15:55                  | Sample Weight:    | 1.0000   |
| Run Time (min):  | 30.88                            | Sample Amount:    | 1.0000   |

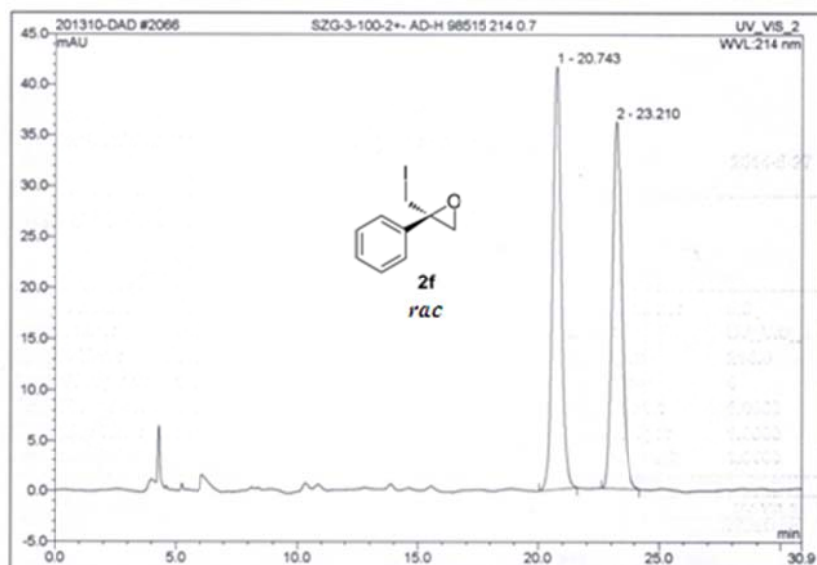

| No.           | Ret.Time<br>min | Peak Name | Height<br>mAU | Area<br>mAU*min | Rel.Area<br>% | Amount | Type |
|---------------|-----------------|-----------|---------------|-----------------|---------------|--------|------|
| 1             | 20.74           | n.a.      | 41.701        | 17.237          | 50.52         | n.a.   | BMB  |
| 2             | 23.21           | n.a.      | 36.116        | 16.880          | 49.48         | n.a.   | BMB  |
| <b>Total:</b> |                 |           | 77.817        | 34.117          | 100.00        | 0.000  |      |

## 2067 SZG-4-14-3 AD-H 98515 214 0.7

|                  |                               |                   |          |
|------------------|-------------------------------|-------------------|----------|
| Sample Name:     | SZG-4-14-3 AD-H 98515 214 0.7 | Injection Volume: | 5.0      |
| Vial Number:     | GE5                           | Channel:          | UV_VIS_2 |
| Sample Type:     | unknown                       | Wavelength:       | 214.0    |
| Control Program: | test-dad2                     | Bandwidth:        | 4        |
| Quantif. Method: | WXL                           | Dilution Factor:  | 1.0000   |
| Recording Time:  | 2014-5-26 16:27               | Sample Weight:    | 1.0000   |
| Run Time (min):  | 28.67                         | Sample Amount:    | 1.0000   |

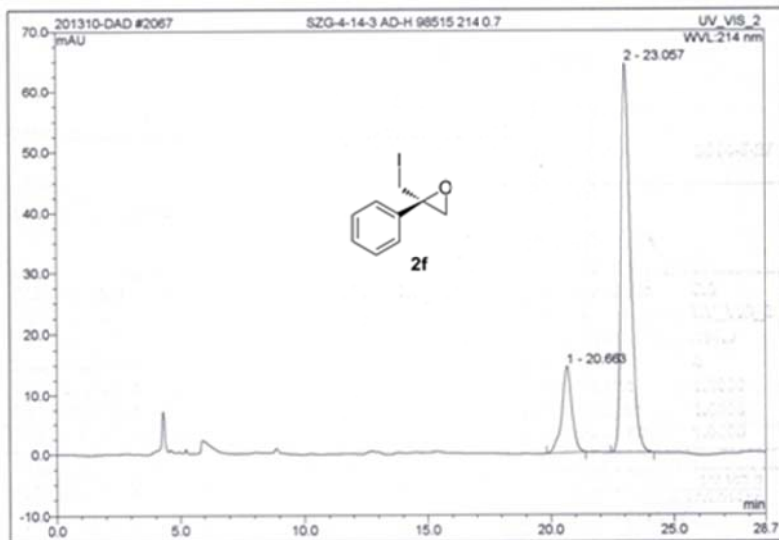

| No.           | Ret. Time<br>min | Peak Name | Height<br>mAU | Area<br>mAU*min | Rel. Area<br>% | Amount | Type |
|---------------|------------------|-----------|---------------|-----------------|----------------|--------|------|
| 1             | 20.66            | n.a.      | 14.487        | 6.759           | 18.33          | n.a.   | BMB  |
| 2             | 23.06            | n.a.      | 64.431        | 30.110          | 81.67          | n.a.   | BMB  |
| <b>Total:</b> |                  |           | 78.918        | 36.869          | 100.00         | 0.000  |      |

**1893 SZG-3-95-3+- AD-H 982 214 0.7**

|                  |                               |                   |          |
|------------------|-------------------------------|-------------------|----------|
| Sample Name:     | SZG-3-95-3+- AD-H 982 214 0.7 | Injection Volume: | 2.0      |
| Vial Number:     | RA1                           | Channel:          | UV_VIS_2 |
| Sample Type:     | unknown                       | Wavelength:       | 214.0    |
| Control Program: | test-dad2                     | Bandwidth:        | 4        |
| Quantif. Method: | WXL                           | Dilution Factor:  | 1.0000   |
| Recording Time:  | 2014-5-6 15:32                | Sample Weight:    | 1.0000   |
| Run Time (min):  | 11.56                         | Sample Amount:    | 1.0000   |

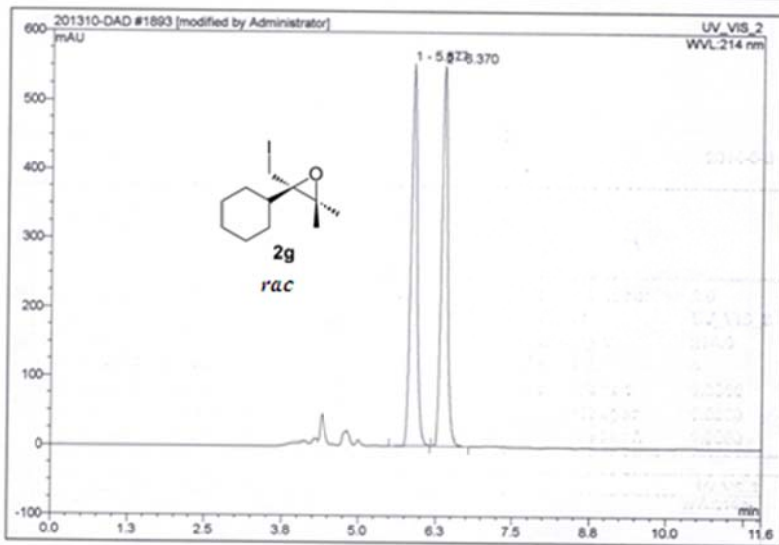

| No.           | Ret. Time<br>min | Peak Name | Height<br>mAU | Area<br>mAU*min | Rel. Area<br>% | Amount | Type |
|---------------|------------------|-----------|---------------|-----------------|----------------|--------|------|
| 1             | 5.88             | n.a.      | 552.706       | 63.362          | 50.09          | n.a.   | BMB* |
| 2             | 6.37             | n.a.      | 549.805       | 63.141          | 49.91          | n.a.   | BMB* |
| <b>Total:</b> |                  |           | 1102.511      | 126.503         | 100.00         | 0.000  |      |

## 1894 SZG-3-95-1 AD-H 982 214 0.7

|                  |                             |                   |          |
|------------------|-----------------------------|-------------------|----------|
| Sample Name:     | SZG-3-95-1 AD-H 982 214 0.7 | Injection Volume: | 1.0      |
| Vial Number:     | RA2                         | Channel:          | UV_VIS_2 |
| Sample Type:     | unknown                     | Wavelength:       | 214.0    |
| Control Program: | test-dad2                   | Bandwidth:        | 4        |
| Quantif. Method: | WXL                         | Dilution Factor:  | 1.0000   |
| Recording Time:  | 2014-5-6 15:51              | Sample Weight:    | 1.0000   |
| Run Time (min):  | 14.77                       | Sample Amount:    | 1.0000   |

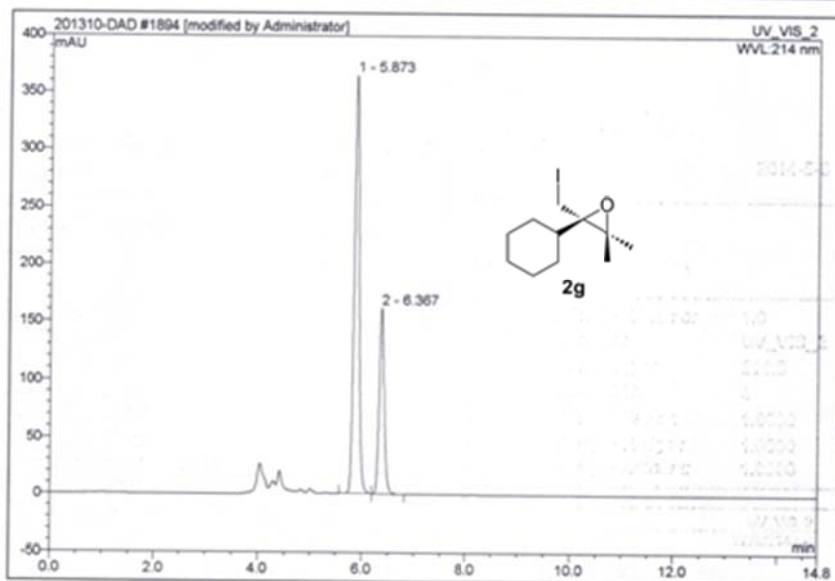

| No.           | Ret. Time<br>min | Peak Name | Height<br>mAU | Area<br>mAU*min | Rel. Area<br>% | Amount | Type |
|---------------|------------------|-----------|---------------|-----------------|----------------|--------|------|
| 1             | 5.87             | n.a.      | 364.621       | 40.126          | 68.56          | n.a.   | BMB* |
| 2             | 6.37             | n.a.      | 161.802       | 18.400          | 31.44          | n.a.   | bMB* |
| <b>Total:</b> |                  |           | 526.423       | 58.525          | 100.00         | 0.000  |      |

2397 SZG-4-51+- PC-4 982 214 0.7

|                  |                             |                   |          |
|------------------|-----------------------------|-------------------|----------|
| Sample Name:     | SZG-4-51+- PC-4 982 214 0.7 | Injection Volume: | 0.8      |
| Vial Number:     | GD3                         | Channel:          | UV_VIS_2 |
| Sample Type:     | unknown                     | Wavelength:       | 214.0    |
| Control Program: | test-dad2                   | Bandwidth:        | 4        |
| Quantif. Method: | WXL                         | Dilution Factor:  | 1.0000   |
| Recording Time:  | 2014-7-3 11:34              | Sample Weight:    | 1.0000   |
| Run Time (min):  | 14.49                       | Sample Amount:    | 1.0000   |

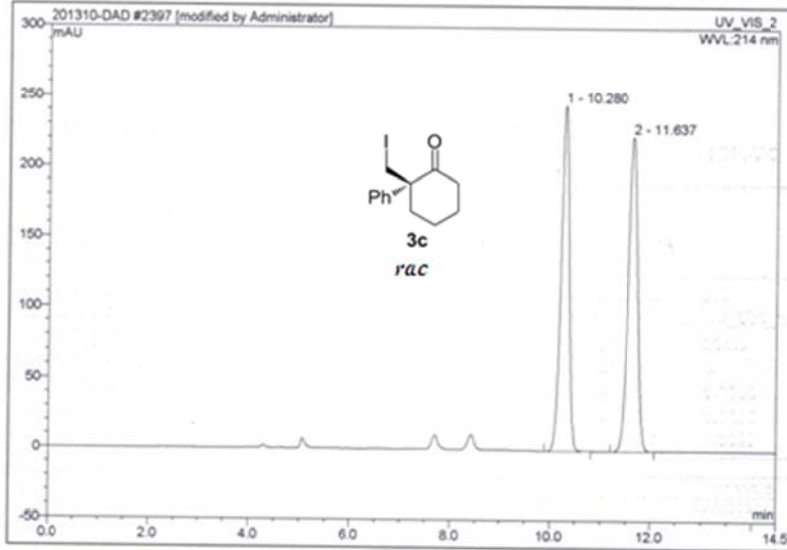

| No.           | Ret. Time<br>min | Peak Name | Height<br>mAU | Area<br>mAU*min | Rel. Area<br>% | Amount | Type |
|---------------|------------------|-----------|---------------|-----------------|----------------|--------|------|
| 1             | 10.28            | n.a.      | 245.628       | 46.823          | 48.67          | n.a.   | BMB  |
| 2             | 11.64            | n.a.      | 223.466       | 49.373          | 51.33          | n.a.   | BMB  |
| <b>Total:</b> |                  |           | 469.094       | 96.196          | 100.00         | 0.000  |      |

## 2842 SZG-5-30 PC-4 982 214 0.7

|                  |                           |                   |          |
|------------------|---------------------------|-------------------|----------|
| Sample Name:     | SZG-5-30 PC-4 982 214 0.7 | Injection Volume: | 1.0      |
| Vial Number:     | GA2                       | Channel:          | UV_VIS_2 |
| Sample Type:     | unknown                   | Wavelength:       | 214.0    |
| Control Program: | test-dad2                 | Bandwidth:        | 4        |
| Quantif. Method: | WXL                       | Dilution Factor:  | 1.0000   |
| Recording Time:  | 2014-9-5 15:37            | Sample Weight:    | 1.0000   |
| Run Time (min):  | 20.77                     | Sample Amount:    | 1.0000   |

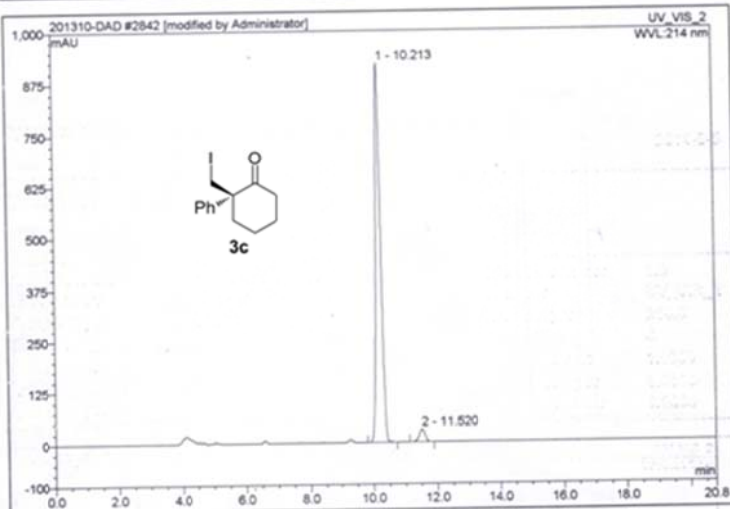

| No.           | Ret. Time<br>min | Peak Name | Height<br>mAU | Area<br>mAU*min | Rel. Area<br>% | Amount | Type |
|---------------|------------------|-----------|---------------|-----------------|----------------|--------|------|
| 1             | 10.21            | n.a.      | 919.844       | 174.636         | 96.33          | n.a.   | BMB  |
| 2             | 11.52            | n.a.      | 30.743        | 6.663           | 3.67           | n.a.   | BMB  |
| <b>Total:</b> |                  |           | 950.587       | 181.299         | 100.00         | 0.000  |      |

1608 SZG-5-47+- ID3 91 214 0.7

|                  |                           |                   |          |
|------------------|---------------------------|-------------------|----------|
| Sample Name:     | SZG-5-47+- ID3 91 214 0.7 | Injection Volume: | 2.0      |
| Vial Number:     | RC6                       | Channel:          | UV_VIS_1 |
| Sample Type:     | unknown                   | Wavelength:       | 214      |
| Control Program: | WXL-2014-1                | Bandwidth:        | n.a.     |
| Quantif. Method: | WXL                       | Dilution Factor:  | 1.0000   |
| Recording Time:  | 2014/9/25 13:33           | Sample Weight:    | 1.0000   |
| Run Time (min):  | 33.10                     | Sample Amount:    | 1.0000   |

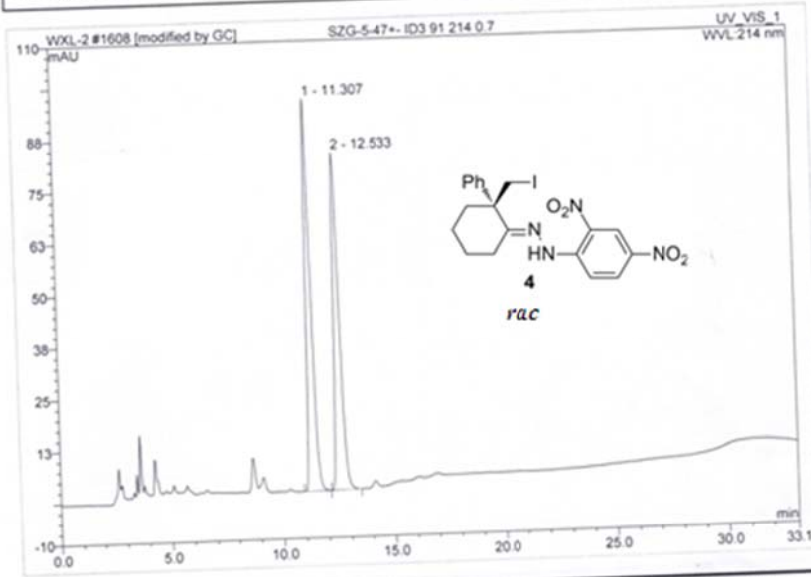

| No.    | Ret.Time min | Peak Name | Height mAU | Area mAU*min | Rel.Area % | Amount | Type |
|--------|--------------|-----------|------------|--------------|------------|--------|------|
| 1      | 11.31        | n.a.      | 94.862     | 24.029       | 50.48      | n.a.   | BMB  |
| 2      | 12.53        | n.a.      | 81.671     | 23.573       | 49.52      | n.a.   | BMB* |
| Total: |              |           | 176.533    | 47.603       | 100.00     | 0.000  |      |

## 1609 SZG-5-40 ID3 91 214 0.7

|                  |                         |                   |          |
|------------------|-------------------------|-------------------|----------|
| Sample Name:     | SZG-5-40 ID3 91 214 0.7 | Injection Volume: | 3.0      |
| Vial Number:     | RC7                     | Channel:          | UV_VIS_1 |
| Sample Type:     | unknown                 | Wavelength:       | 214      |
| Control Program: | WXL-2014-1              | Bandwidth:        | n.a.     |
| Quantif. Method: | WXL                     | Dilution Factor:  | 1.0000   |
| Recording Time:  | 2014/9/25 14:13         | Sample Weight:    | 1.0000   |
| Run Time (min):  | 25.09                   | Sample Amount:    | 1.0000   |

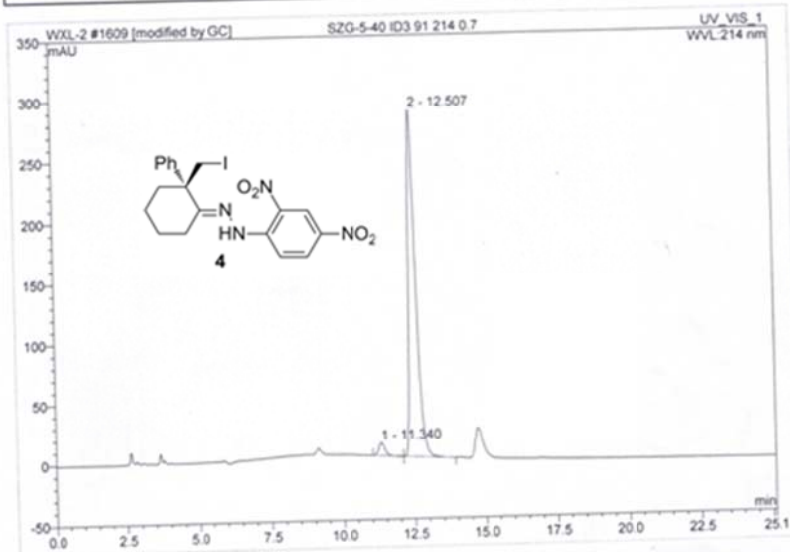

| No.    | Ret.Time<br>min | Peak Name | Height<br>mAU | Area<br>mAU*min | Rel.Area<br>% | Amount | Type |
|--------|-----------------|-----------|---------------|-----------------|---------------|--------|------|
| 1      | 11.34           | n.a.      | 10.808        | 2.665           | 3.08          | n.a.   | BM*  |
| 2      | 12.51           | n.a.      | 286.658       | 83.844          | 96.92         | n.a.   | MB*  |
| Total: |                 |           | 297.476       | 86.508          | 100.00        | 0.000  |      |



## 1239 SZG-4-93-1+- PC-4 982 214 0.7

|                  |                               |                   |          |
|------------------|-------------------------------|-------------------|----------|
| Sample Name:     | SZG-4-93-1+- PC-4 982 214 0.7 | Injection Volume: | 2.0      |
| Vial Number:     | GC7                           | Channel:          | UV_VIS_1 |
| Sample Type:     | unknown                       | Wavelength:       | 214      |
| Control Program: | WXL-2014-2                    | Bandwidth:        | n.a.     |
| Quantif. Method: | WXL                           | Dilution Factor:  | 1.0000   |
| Recording Time:  | 2014/8/11 10:13               | Sample Weight:    | 1.0000   |
| Run Time (min):  | 13.89                         | Sample Amount:    | 1.0000   |

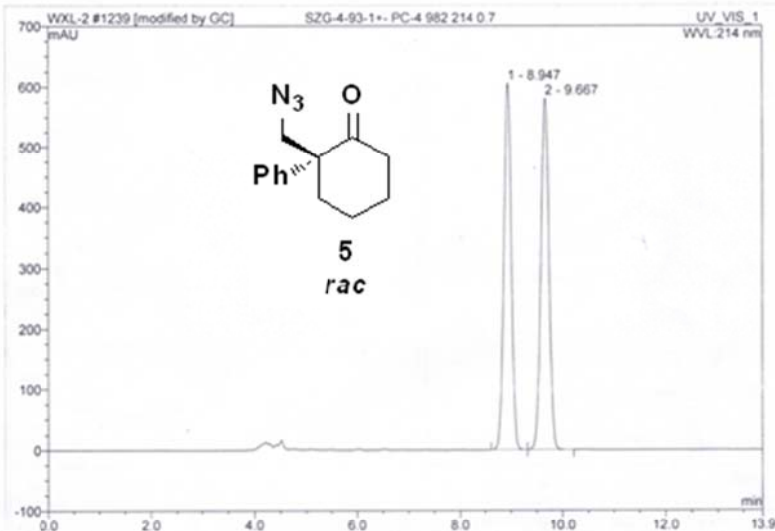

| No.           | Ret. Time<br>min | Peak Name | Height<br>mAU | Area<br>mAU*min | Ref. Area<br>% | Amount | Type |
|---------------|------------------|-----------|---------------|-----------------|----------------|--------|------|
| 1             | 8.95             | n.a.      | 606.479       | 100.463         | 48.79          | n.a.   | BMB* |
| 2             | 9.67             | n.a.      | 581.812       | 105.458         | 51.21          | n.a.   | bMB* |
| <b>Total:</b> |                  |           | 1188.291      | 205.921         | 100.00         | 0.000  |      |

2728 SZG-5-7 PC-4 982 214 0.7

|                  |                          |                   |          |
|------------------|--------------------------|-------------------|----------|
| Sample Name:     | SZG-5-7 PC-4 982 214 0.7 | Injection Volume: | 1.0      |
| Vial Number:     | BB2                      | Channel:          | UV_VIS_2 |
| Sample Type:     | unknown                  | Wavelength:       | 214.0    |
| Control Program: | test-dad2                | Bandwidth:        | 4        |
| Quantif. Method: | WXL                      | Dilution Factor:  | 1.0000   |
| Recording Time:  | 2014-8-18 14:32          | Sample Weight:    | 1.0000   |
| Run Time (min):  | 20.00                    | Sample Amount:    | 1.0000   |

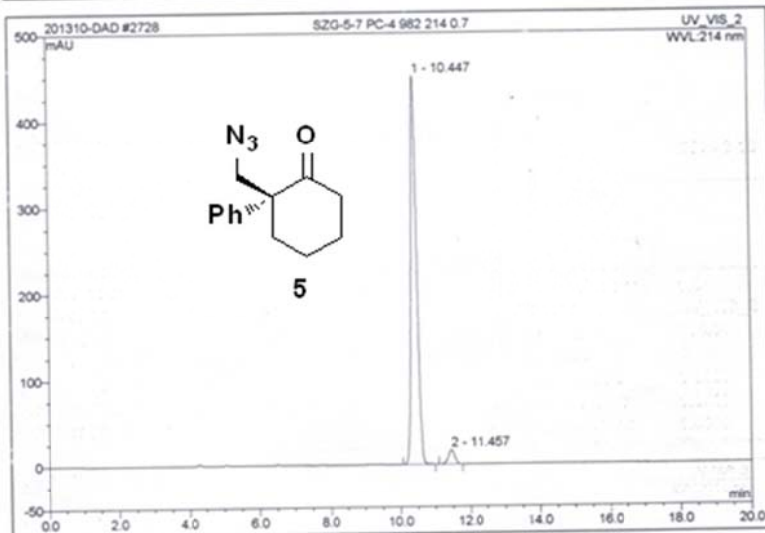

| No.    | Ret.Time<br>min | Peak Name | Height<br>mAU | Area<br>mAU*min | Rel.Area<br>% | Amount | Type |
|--------|-----------------|-----------|---------------|-----------------|---------------|--------|------|
| 1      | 10.45           | n.a.      | 450.431       | 86.486          | 96.10         | n.a.   | BMB  |
| 2      | 11.46           | n.a.      | 16.622        | 3.505           | 3.90          | n.a.   | BMB  |
| Total: |                 |           | 467.053       | 89.971          | 100.00        | 0.000  |      |

**2810 SZG-5-28+- PC-4 82 214 0.7**

|                  |                            |                   |          |
|------------------|----------------------------|-------------------|----------|
| Sample Name:     | SZG-5-28+- PC-4 82 214 0.7 | Injection Volume: | 2.0      |
| Vial Number:     | BE7                        | Channel:          | UV_VIS_2 |
| Sample Type:     | unknown                    | Wavelength:       | 214.0    |
| Control Program: | test-dad2                  | Bandwidth:        | 4        |
| Quantif. Method: | WXL                        | Dilution Factor:  | 1.0000   |
| Recording Time:  | 2014-9-4 14:20             | Sample Weight:    | 1.0000   |
| Run Time (min):  | 13.24                      | Sample Amount:    | 1.0000   |

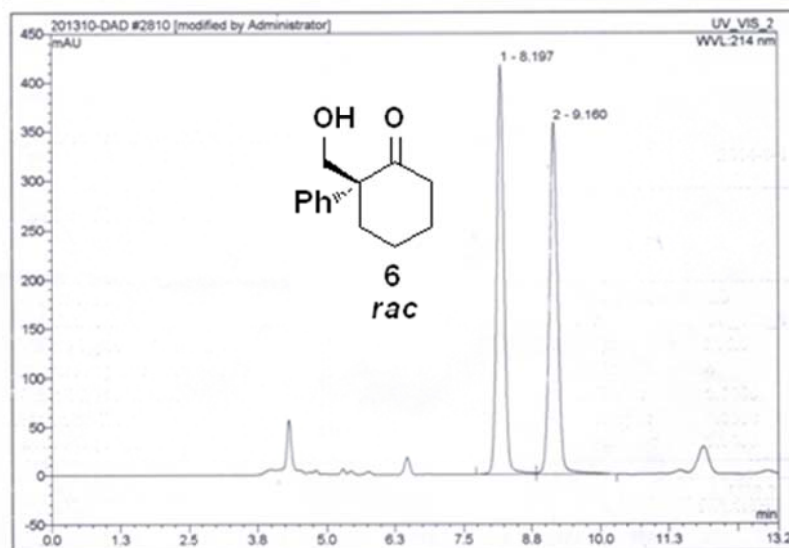

| No.           | Ret. Time<br>min | Peak Name | Height<br>mAU | Area<br>mAU*min | Rel. Area<br>% | Amount | Type |
|---------------|------------------|-----------|---------------|-----------------|----------------|--------|------|
| 1             | 8.20             | n.a.      | 417.751       | 64.331          | 50.18          | n.a.   | BM   |
| 2             | 9.16             | n.a.      | 358.349       | 63.869          | 49.82          | n.a.   | MB   |
| <b>Total:</b> |                  |           | 776.100       | 128.200         | 100.00         | 0.000  |      |

2844 SZG-5-31 PC-4 82 214 0.7

|                  |                          |                   |          |
|------------------|--------------------------|-------------------|----------|
| Sample Name:     | SZG-5-31 PC-4 82 214 0.7 | Injection Volume: | 5.0      |
| Vial Number:     | RE7                      | Channel:          | UV_VIS_2 |
| Sample Type:     | unknown                  | Wavelength:       | 214.0    |
| Control Program: | test-dad2                | Bandwidth:        | 4        |
| Quantif. Method: | WXL                      | Dilution Factor:  | 1.0000   |
| Recording Time:  | 2014-9-9 11:33           | Sample Weight:    | 1.0000   |
| Run Time (min):  | 24.67                    | Sample Amount:    | 1.0000   |

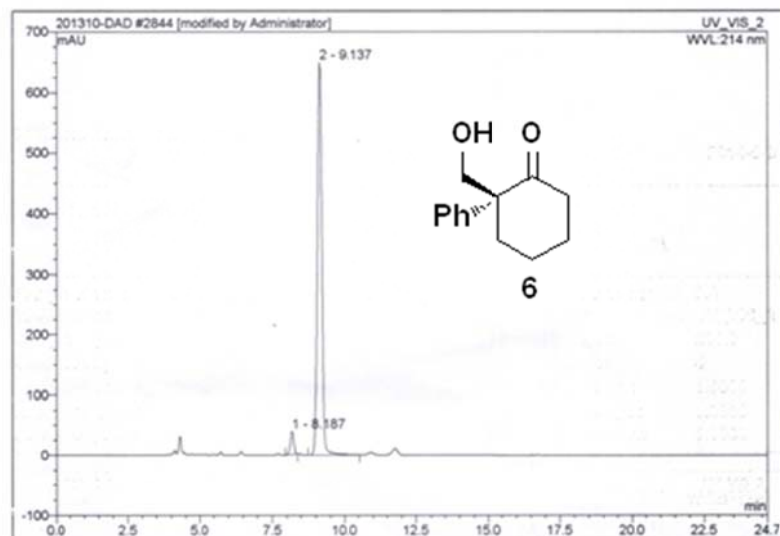

| No.           | Ret.Time<br>min | Peak Name | Height<br>mAU | Area<br>mAU*min | Rel.Area<br>% | Amount | Type |
|---------------|-----------------|-----------|---------------|-----------------|---------------|--------|------|
| 1             | 8.19            | n.a.      | 38.636        | 5.591           | 4.84          | n.a.   | BMB  |
| 2             | 9.14            | n.a.      | 649.484       | 114.866         | 95.36         | n.a.   | BMB  |
| <b>Total:</b> |                 |           | 688.120       | 120.457         | 100.00        | 0.000  |      |

**4173 SZG-7-56-1+- PC-4 982 214 0.7**

|                  |                               |                   |          |
|------------------|-------------------------------|-------------------|----------|
| Sample Name:     | SZG-7-56-1+- PC-4 982 214 0.7 | Injection Volume: | 3.0      |
| Vial Number:     | GB4                           | Channel:          | UV_VIS_2 |
| Sample Type:     | unknown                       | Wavelength:       | 214.0    |
| Control Program: | test-dad                      | Bandwidth:        | 4        |
| Quantif. Method: | WXL                           | Dilution Factor:  | 1.0000   |
| Recording Time:  | 2015-2-3 20:33                | Sample Weight:    | 1.0000   |
| Run Time (min):  | 15.00                         | Sample Amount:    | 1.0000   |

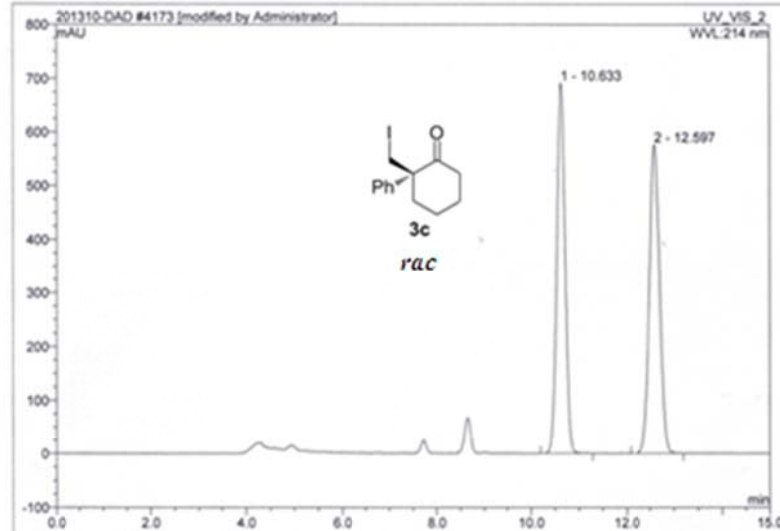

| No.           | Ret.Time<br>min | Peak Name | Height<br>mAU | Area<br>mAU*min | Rel.Area<br>% | Amount | Type |
|---------------|-----------------|-----------|---------------|-----------------|---------------|--------|------|
| 1             | 10.63           | n.a.      | 691.829       | 139.886         | 49.45         | n.a.   | BMB  |
| 2             | 12.60           | n.a.      | 576.657       | 142.996         | 50.55         | n.a.   | BMB  |
| <b>Total:</b> |                 |           | 1268.486      | 282.881         | 100.00        | 0.000  |      |

**4167 SZG-7-56-1 PC-4 982 214 0.7**

|                  |                             |                   |          |
|------------------|-----------------------------|-------------------|----------|
| Sample Name:     | SZG-7-56-1 PC-4 982 214 0.7 | Injection Volume: | 3.0      |
| Vial Number:     | GC1                         | Channel:          | UV_VIS_2 |
| Sample Type:     | unknown                     | Wavelength:       | 214.0    |
| Control Program: | test-dad                    | Bandwidth:        | 4        |
| Quantif. Method: | WXL                         | Dilution Factor:  | 1.0000   |
| Recording Time:  | 2015-2-3 14:54              | Sample Weight:    | 1.0000   |
| Run Time (min):  | 18.48                       | Sample Amount:    | 1.0000   |

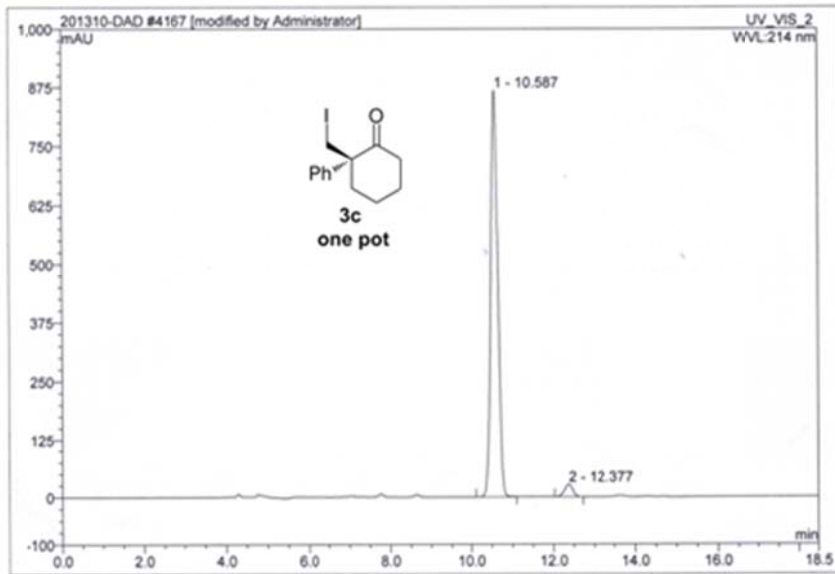

| No.           | Ret.Time<br>min | Peak Name | Height<br>mAU | Area<br>mAU*min | Rel.Area<br>% | Amount | Type |
|---------------|-----------------|-----------|---------------|-----------------|---------------|--------|------|
| 1             | 10.59           | n.a.      | 868.349       | 172.897         | 96.47         | n.a.   | BM*  |
| 2             | 12.38           | n.a.      | 26.696        | 6.330           | 3.53          | n.a.   | MB*  |
| <b>Total:</b> |                 |           | 895.045       | 179.227         | 100.00        | 0.000  |      |

**4438 SZG-7-78 PC-4 982 214 0.7**

|                  |                           |                   |          |
|------------------|---------------------------|-------------------|----------|
| Sample Name:     | SZG-7-78 PC-4 982 214 0.7 | Injection Volume: | 1.0      |
| Vial Number:     | GB2                       | Channel:          | UV_VIS_2 |
| Sample Type:     | unknown                   | Wavelength:       | 214.0    |
| Control Program: | test-dad                  | Bandwidth:        | 4        |
| Quantif. Method: | WXL                       | Dilution Factor:  | 1.0000   |
| Recording Time:  | 2015-3-17 14:03           | Sample Weight:    | 1.0000   |
| Run Time (min):  | 25.12                     | Sample Amount:    | 1.0000   |

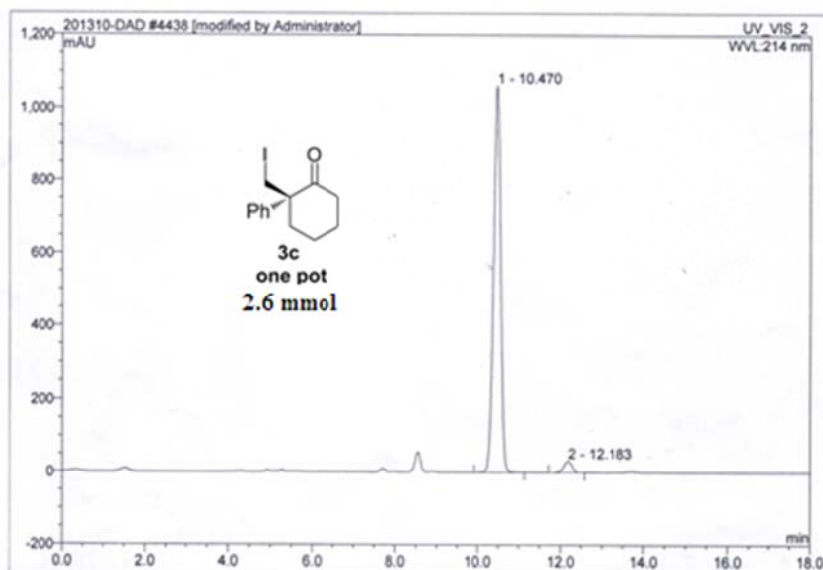

| No.           | Ret.Time min | Peak Name | Height mAU | Area mAU*min | Rel.Area % | Amount | Type |
|---------------|--------------|-----------|------------|--------------|------------|--------|------|
| 1             | 10.47        | n.a.      | 1062.300   | 209.737      | 96.65      | n.a.   | BM * |
| 2             | 12.18        | n.a.      | 31.676     | 7.280        | 3.35       | n.a.   | BMB* |
| <b>Total:</b> |              |           | 1093.975   | 217.017      | 100.00     | 0.000  |      |

**2895 SZG-7-58-1 IF3 982 214 0.7**

|                  |                            |                   |          |
|------------------|----------------------------|-------------------|----------|
| Sample Name:     | SZG-7-58-1 IF3 982 214 0.7 | Injection Volume: | 5.0      |
| Vial Number:     | BE1                        | Channel:          | UV_VIS_1 |
| Sample Type:     | unknown                    | Wavelength:       | 214      |
| Control Program: | WXL-2014-1                 | Bandwidth:        | n.a.     |
| Quantif. Method: | WXL                        | Dilution Factor:  | 1.0000   |
| Recording Time:  | 2015/2/7 11:13             | Sample Weight:    | 1.0000   |
| Run Time (min):  | 18.01                      | Sample Amount:    | 1.0000   |

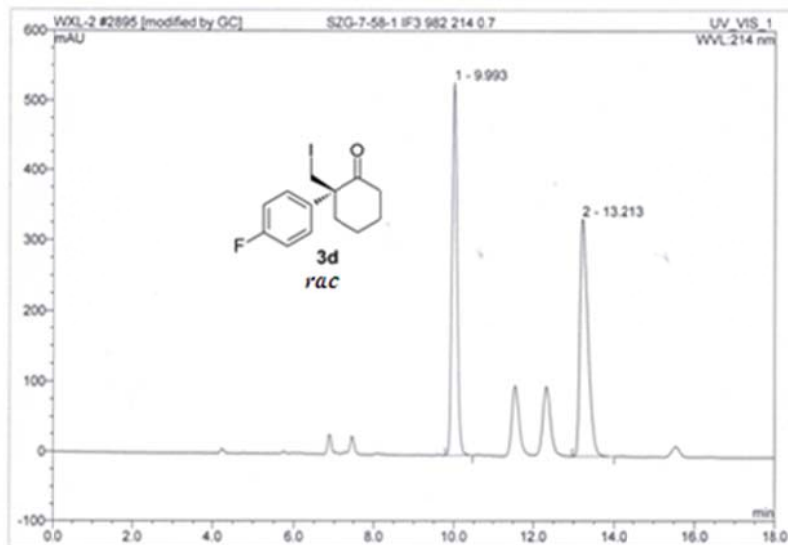

| No.           | Ret.Time<br>min | Peak Name | Height<br>mAU | Area<br>mAU*min | Rel.Area<br>% | Amount | Type |
|---------------|-----------------|-----------|---------------|-----------------|---------------|--------|------|
| 1             | 9.99            | n.a.      | 531.138       | 77.547          | 50.28         | n.a.   | BMB* |
| 2             | 13.21           | n.a.      | 336.888       | 76.685          | 49.72         | n.a.   | MB*  |
| <b>Total:</b> |                 |           | 868.025       | 154.231         | 100.00        | 0.000  |      |



**2896 SZG-7-55-1 IF3 982 214 0.7**

|                  |                            |                   |          |
|------------------|----------------------------|-------------------|----------|
| Sample Name:     | SZG-7-55-1 IF3 982 214 0.7 | Injection Volume: | 5.0      |
| Vial Number:     | BE2                        | Channel:          | UV_VIS_1 |
| Sample Type:     | unknown                    | Wavelength:       | 214      |
| Control Program: | WXL-2014-1                 | Bandwidth:        | n.a.     |
| Quantif. Method: | WXL                        | Dilution Factor:  | 1.0000   |
| Recording Time:  | 2015/2/7 11:33             | Sample Weight:    | 1.0000   |
| Run Time (min):  | 18.01                      | Sample Amount:    | 1.0000   |

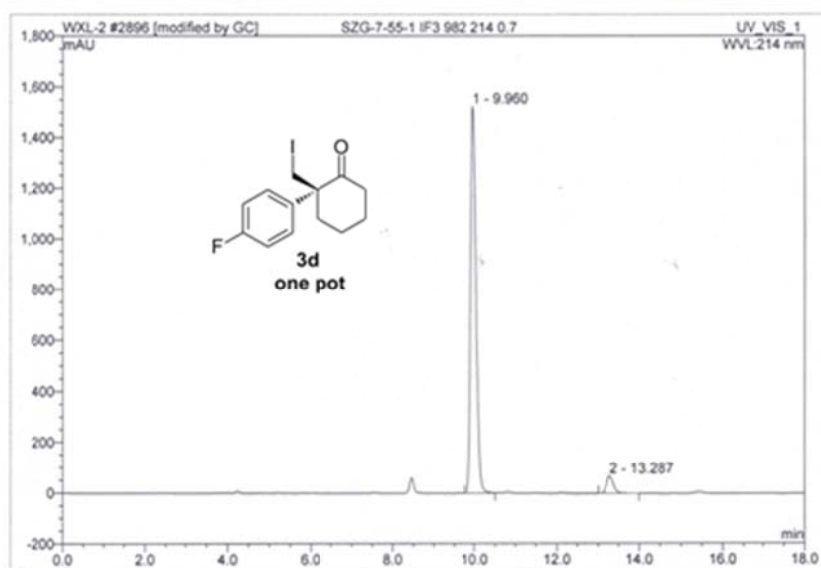

| No.           | Ret.Time<br>min | Peak Name | Height<br>mAU | Area<br>mAU*min | Rel.Area<br>% | Amount | Type |
|---------------|-----------------|-----------|---------------|-----------------|---------------|--------|------|
| 1             | 9.96            | n.a.      | 1526.925      | 239.984         | 94.61         | n.a.   | BM * |
| 2             | 13.29           | n.a.      | 68.078        | 13.679          | 5.39          | n.a.   | BMB  |
| <b>Total:</b> |                 |           | 1595.003      | 253.663         | 100.00        | 0.000  |      |

**2891 SZG-7-58-2 PC-4 991 214 0.7**

|                  |                             |                   |          |
|------------------|-----------------------------|-------------------|----------|
| Sample Name:     | SZG-7-58-2 PC-4 991 214 0.7 | Injection Volume: | 5.0      |
| Vial Number:     | BC1                         | Channel:          | UV_VIS_1 |
| Sample Type:     | unknown                     | Wavelength:       | 214      |
| Control Program: | WXL-2014                    | Bandwidth:        | n.a.     |
| Quantif. Method: | WXL                         | Dilution Factor:  | 1.0000   |
| Recording Time:  | 2015/2/6 18:19              | Sample Weight:    | 1.0000   |
| Run Time (min):  | 30.00                       | Sample Amount:    | 1.0000   |

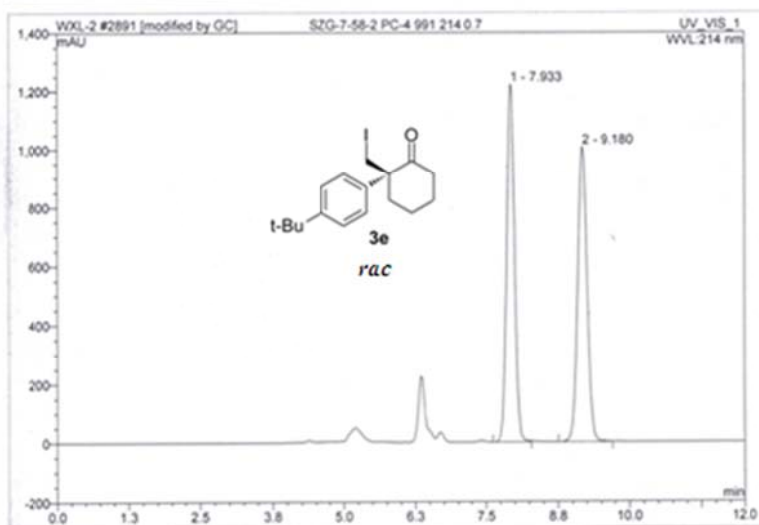

| No.           | Ret.Time<br>min | Peak Name | Height<br>mAU | Area<br>mAU*min | Rel.Area<br>% | Amount | Type |
|---------------|-----------------|-----------|---------------|-----------------|---------------|--------|------|
| 1             | 7.93            | n.a.      | 1222.615      | 195.038         | 50.68         | n.a.   | BM * |
| 2             | 9.18            | n.a.      | 1007.291      | 189.790         | 49.32         | n.a.   | M *  |
| <b>Total:</b> |                 |           | 2229.906      | 384.827         | 100.00        | 0.000  |      |

**2892 SZG-7-55-2 PC-4 991 214 0.7**

|                  |                             |                   |          |
|------------------|-----------------------------|-------------------|----------|
| Sample Name:     | SZG-7-55-2 PC-4 991 214 0.7 | Injection Volume: | 5.0      |
| Vial Number:     | BC2                         | Channel:          | UV_VIS_1 |
| Sample Type:     | unknown                     | Wavelength:       | 214      |
| Control Program: | WXL-2014                    | Bandwidth:        | n.a.     |
| Quantif. Method: | WXL                         | Dilution Factor:  | 1.0000   |
| Recording Time:  | 2015/2/6 20:22              | Sample Weight:    | 1.0000   |
| Run Time (min):  | 11.01                       | Sample Amount:    | 1.0000   |

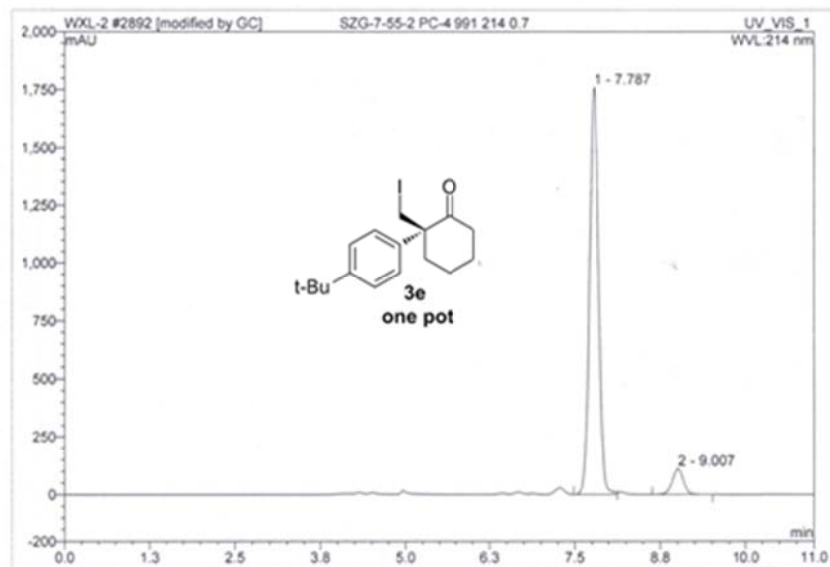

| No.           | Ret.Time<br>min | Peak Name | Height<br>mAU | Area<br>mAU*min | Rel.Area<br>% | Amount | Type |
|---------------|-----------------|-----------|---------------|-----------------|---------------|--------|------|
| 1             | 7.79            | n.a.      | 1759.955      | 278.938         | 93.12         | n.a.   | BM * |
| 2             | 9.01            | n.a.      | 110.995       | 20.596          | 6.88          | n.a.   | MB*  |
| <b>Total:</b> |                 |           | 1870.950      | 299.533         | 100.00        | 0.000  |      |

**2889SZG-7-57 PC-4 991 214 0.7**

|                  |                           |                   |          |
|------------------|---------------------------|-------------------|----------|
| Sample Name:     | SZG-7-57 PC-4 991 214 0.7 | Injection Volume: | 5.0      |
| Vial Number:     | BD1                       | Channel:          | UV_VIS_1 |
| Sample Type:     | unknown                   | Wavelength:       | 214      |
| Control Program: | WXL-2014                  | Bandwidth:        | n.a.     |
| Quantif. Method: | WXL                       | Dilution Factor:  | 1.0000   |
| Recording Time:  | 2015/2/6 16:23            | Sample Weight:    | 1.0000   |
| Run Time (min):  | 22.95                     | Sample Amount:    | 1.0000   |

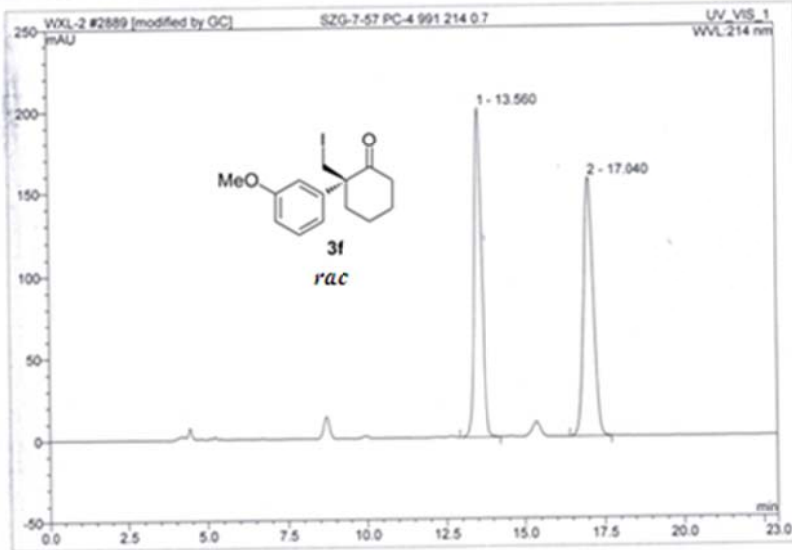

| No.           | Ret. Time<br>min | Peak Name | Height<br>mAU | Area<br>mAU*min | Rel. Area<br>% | Amount | Type |
|---------------|------------------|-----------|---------------|-----------------|----------------|--------|------|
| 1             | 13.56            | n.a.      | 200.590       | 55.209          | 49.99          | n.a.   | BM * |
| 2             | 17.04            | n.a.      | 156.760       | 55.228          | 50.01          | n.a.   | BM * |
| <b>Total:</b> |                  |           | 357.350       | 110.437         | 100.00         | 0.000  |      |

|                                         |                             |                   |          |
|-----------------------------------------|-----------------------------|-------------------|----------|
| <b>2900 SZG-7-60-3 PC-4 991 214 0.7</b> |                             |                   |          |
| Sample Name:                            | SZG-7-60-3 PC-4 991 214 0.7 | Injection Volume: | 5.0      |
| Vial Number:                            | RE2                         | Channel:          | UV_VIS_1 |
| Sample Type:                            | unknown                     | Wavelength:       | 214      |
| Control Program:                        | WXL-2014-1                  | Bandwidth:        | n.a.     |
| Quantif. Method:                        | WXL                         | Dilution Factor:  | 1.0000   |
| Recording Time:                         | 2015/2/9 10:36              | Sample Weight:    | 1.0000   |
| Run Time (min):                         | 20.00                       | Sample Amount:    | 1.0000   |

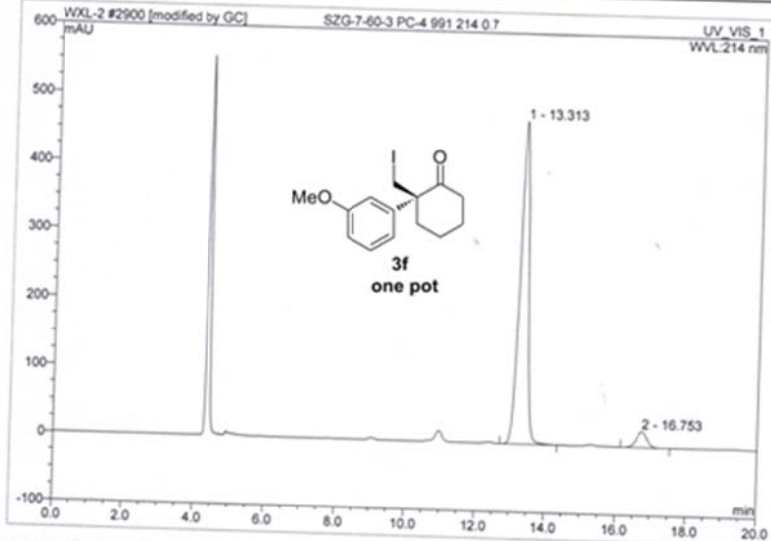

| No.           | Ret.Time min | Peak Name | Height mAU | Area mAU*min | Rel.Area % | Amount | Type |
|---------------|--------------|-----------|------------|--------------|------------|--------|------|
| 1             | 13.31        | n.a.      | 473.013    | 133.596      | 94.00      | n.a.   | BM*  |
| 2             | 16.75        | n.a.      | 23.463     | 8.527        | 6.00       | n.a.   | MB*  |
| <b>Total:</b> |              |           | 496.476    | 142.122      | 100.00     | 0.000  |      |

**4342 SZG-4-89 PC-4 982 214 0.7**

|                  |                           |                   |          |
|------------------|---------------------------|-------------------|----------|
| Sample Name:     | SZG-4-89 PC-4 982 214 0.7 | Injection Volume: | 5.0      |
| Vial Number:     | BC6                       | Channel:          | UV_VIS_2 |
| Sample Type:     | unknown                   | Wavelength:       | 214.0    |
| Control Program: | test-dad                  | Bandwidth:        | 4        |
| Quantif. Method: | WXL                       | Dilution Factor:  | 1.0000   |
| Recording Time:  | 2015-3-10 18:50           | Sample Weight:    | 1.0000   |
| Run Time (min):  | 15.00                     | Sample Amount:    | 1.0000   |

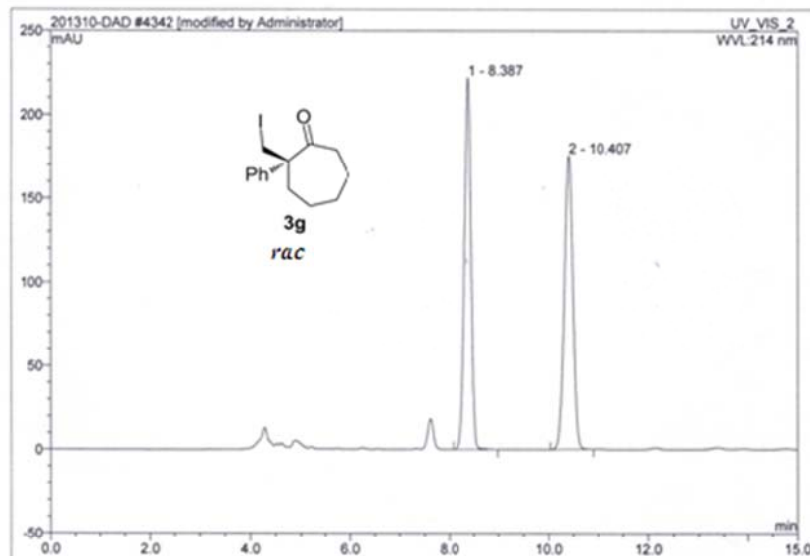

| No.           | Ret.Time<br>min | Peak Name | Height<br>mAU | Area<br>mAU*min | Rel.Area<br>% | Amount | Type |
|---------------|-----------------|-----------|---------------|-----------------|---------------|--------|------|
| 1             | 8.39            | n.a.      | 221.806       | 34.096          | 49.53         | n.a.   | BMB  |
| 2             | 10.41           | n.a.      | 175.754       | 34.748          | 50.47         | n.a.   | BMB  |
| <b>Total:</b> |                 |           | 397.560       | 68.844          | 100.00        | 0.000  |      |

**4309 SZG-7-60-4B PC-4 982 214 0.7**

|                  |                              |                   |          |
|------------------|------------------------------|-------------------|----------|
| Sample Name:     | SZG-7-60-4B PC-4 982 214 0.7 | Injection Volume: | 3.0      |
| Vial Number:     | RB1                          | Channel:          | UV_VIS_2 |
| Sample Type:     | unknown                      | Wavelength:       | 214.0    |
| Control Program: | test-dad                     | Bandwidth:        | 4        |
| Quantif. Method: | WXL                          | Dilution Factor:  | 1.0000   |
| Recording Time:  | 2015-3-9 9:24                | Sample Weight:    | 1.0000   |
| Run Time (min):  | 17.04                        | Sample Amount:    | 1.0000   |

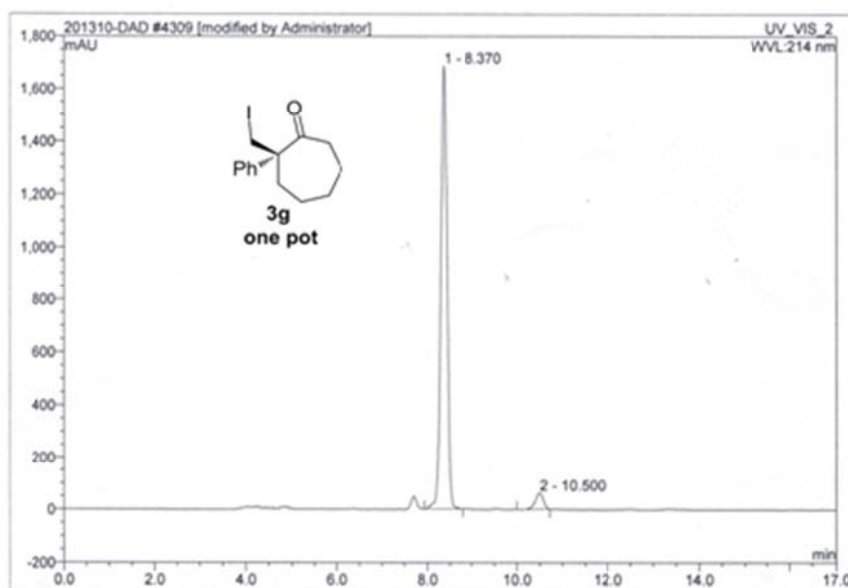

| No.           | Ret.Time<br>min | Peak Name | Height<br>mAU | Area<br>mAU*min | Rel.Area<br>% | Amount | Type |
|---------------|-----------------|-----------|---------------|-----------------|---------------|--------|------|
| 1             | 8.37            | n.a.      | 1686.169      | 271.499         | 95.56         | n.a.   | BMB* |
| 2             | 10.50           | n.a.      | 61.795        | 12.623          | 4.44          | n.a.   | BMB* |
| <b>Total:</b> |                 |           | 1747.963      | 284.122         | 100.00        | 0.000  |      |

## 8. VCD and IR experimental of **2c**.

BioTools ChiralIR-2X FT-VCD spectrometer, equipped with a single photoelastic modulation (PEM) and a mercury cadmium tellurium (MCT) detector, was used to record the VCD and IR spectra. A solution of **2c** (79 mg) in CDCl<sub>3</sub> (150 μL) was placed in a BaF<sub>2</sub> cell with a path length of 75 μm. Data were acquired at a resolution of 4 cm<sup>-1</sup> for 3 h. The racemic sample was measured under the same conditions to obtain VCD baseline.

### *VCD and IR calculations*

Conformational analysis of (*R*)-**2c** was performed with Compute VOA (BioTools Inc., Jupiter, FL) using the Monte Carlo protocol at the molecular mechanic force field MMFF94 level. Within a 20 kcal/mol window, four energetically distinct conformers were predicted. Geometry optimization and frequencies calculation were carried out using the B3PW91 hybrid density functional and LANL2DZ basis set with Gaussian 09 (Gaussian Inc., Wallingford, CT). Boltzmann-population-weighted composite VCD and IR spectra were then generated by Compute VOA.

Comparisons of experimental and calculated VCD and IR spectra can be seen in Figure S2. A scaling factor of 0.96, obtained from Compare VOA (BioTools Inc., Jupiter, FL), has been applied to the calculated VCD and IR frequencies. The comparisons establish the absolute configuration of **2c** as (*R*).

The assignment was evaluated by Compare VOA. Table S7 shows the related result, including spectral similarities and enantiomeric similarity index (the difference between the VCD spectral similarity of the correct and the incorrect enantiomers, ESI). The confidence level of the (*R*) assignment is 93%, based on the current Compare VOA database consisting of 105 previous correct assignments for different chiral structures.



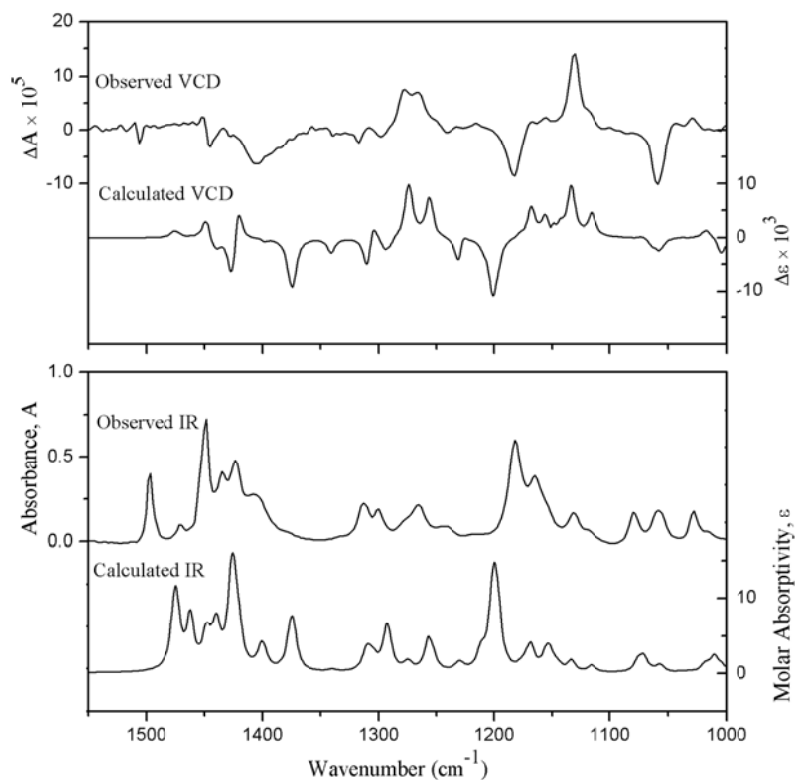

**Figure S2.** VCD and IR spectra observed for **2c** compared with the corresponding calculated spectra of (*R*)-**2c**.

**Table S7.** Compare VOA result for VCD and IR spectra of **2c**

| Calculation Method  | <sup>a</sup> $S_{IR}$ | <sup>b</sup> $S_R$ | <sup>c</sup> $S_S$ | <sup>d</sup> $ESI$ |
|---------------------|-----------------------|--------------------|--------------------|--------------------|
| DFT//B3PW91/LANL2DZ | 74.0                  | 65.8               | 9.3                | 56.5               |

<sup>a</sup> IR spectral similarity

<sup>b</sup> VCD spectral similarity for the (*R*)-configuration

<sup>c</sup> VCD spectral similarity for the (*S*)-configuration

<sup>d</sup> Enantiomeric similarity index.

## 9. X-ray crystallography of 2ac and 4

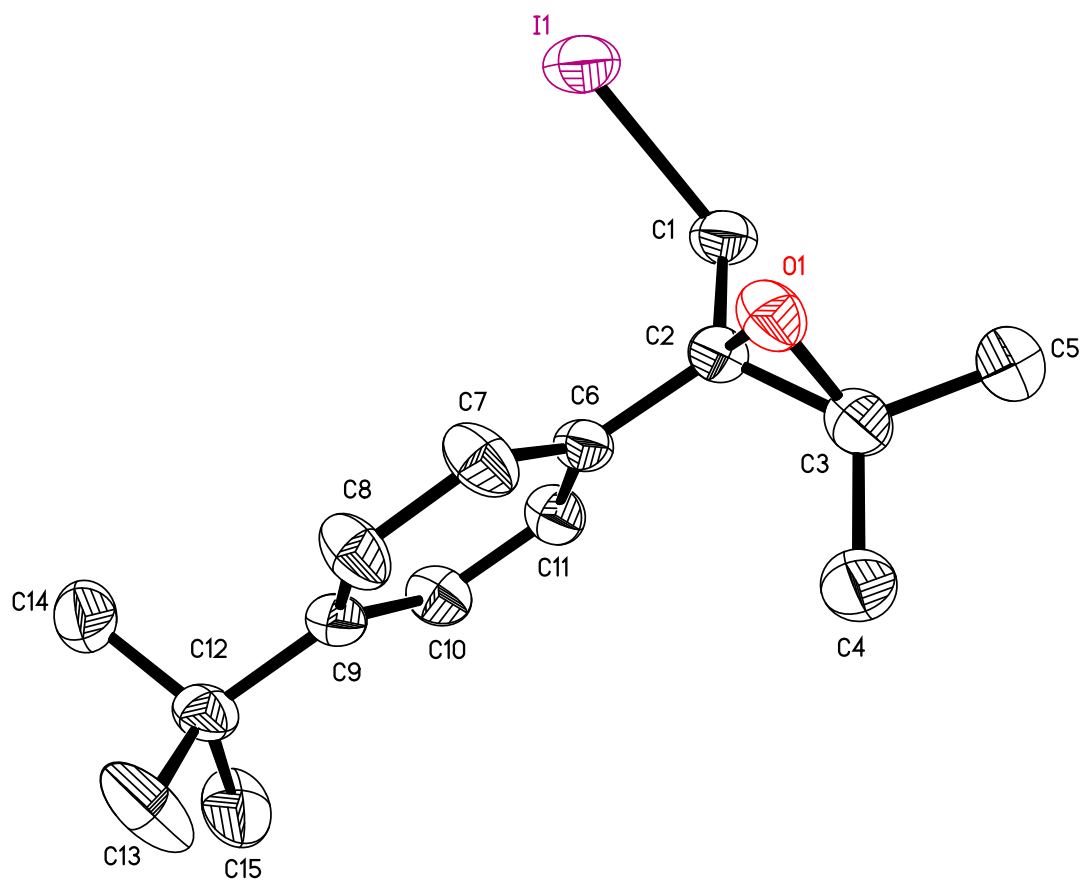

Figure S3. ORTEP drawing of 2ac

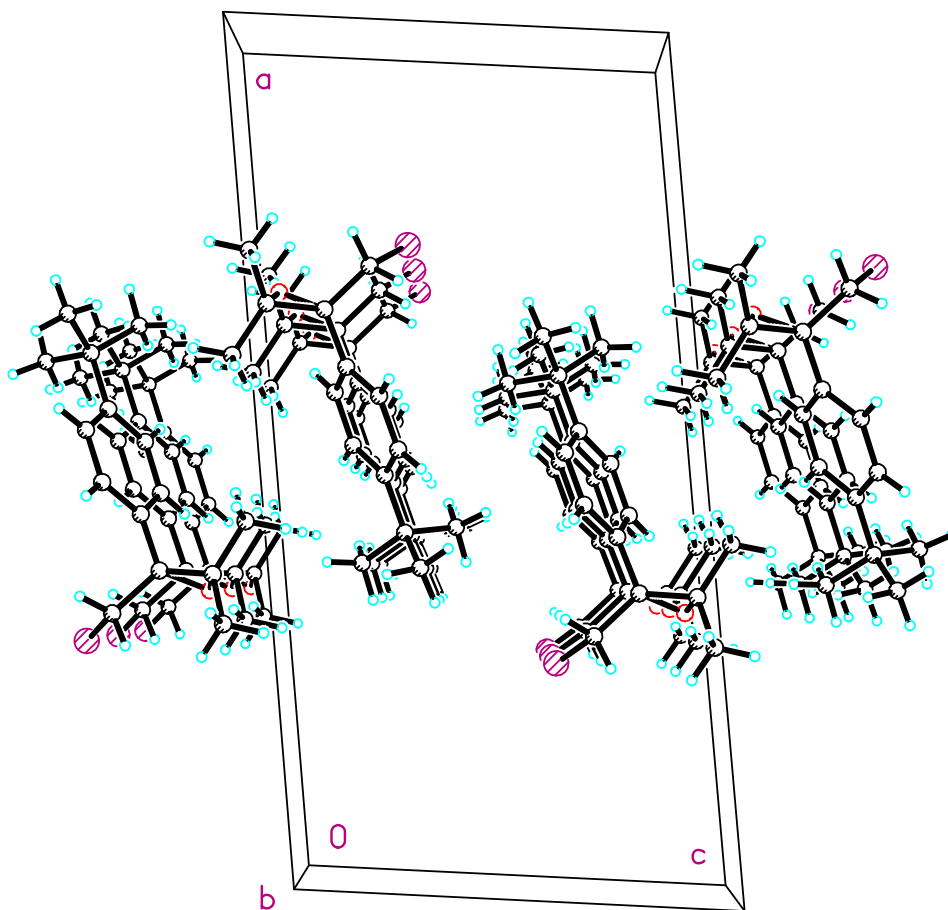

**Figure S5.** X-ray crystallography of **2ac**

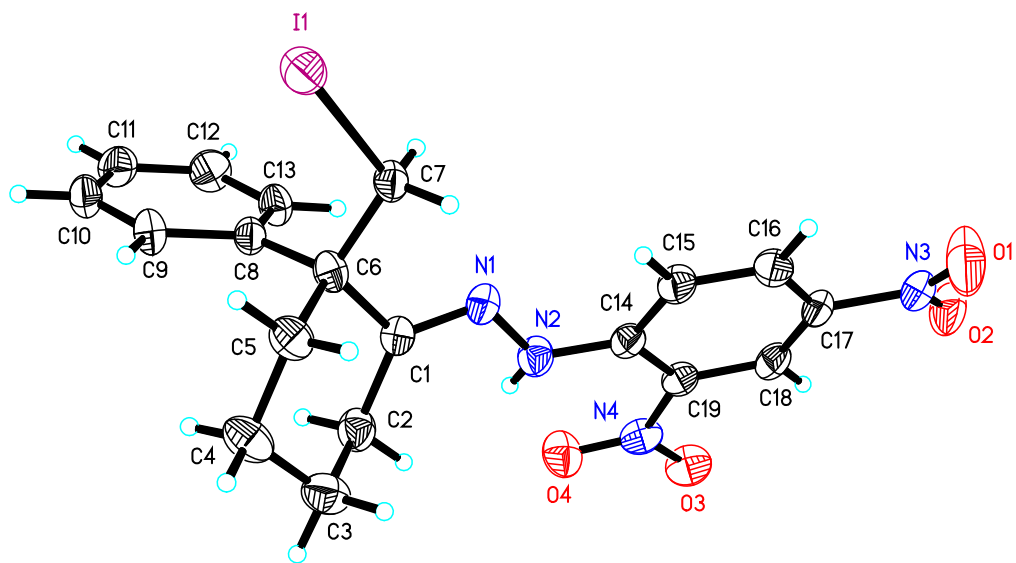

**Figure S5.** ORTEP drawing of **4**

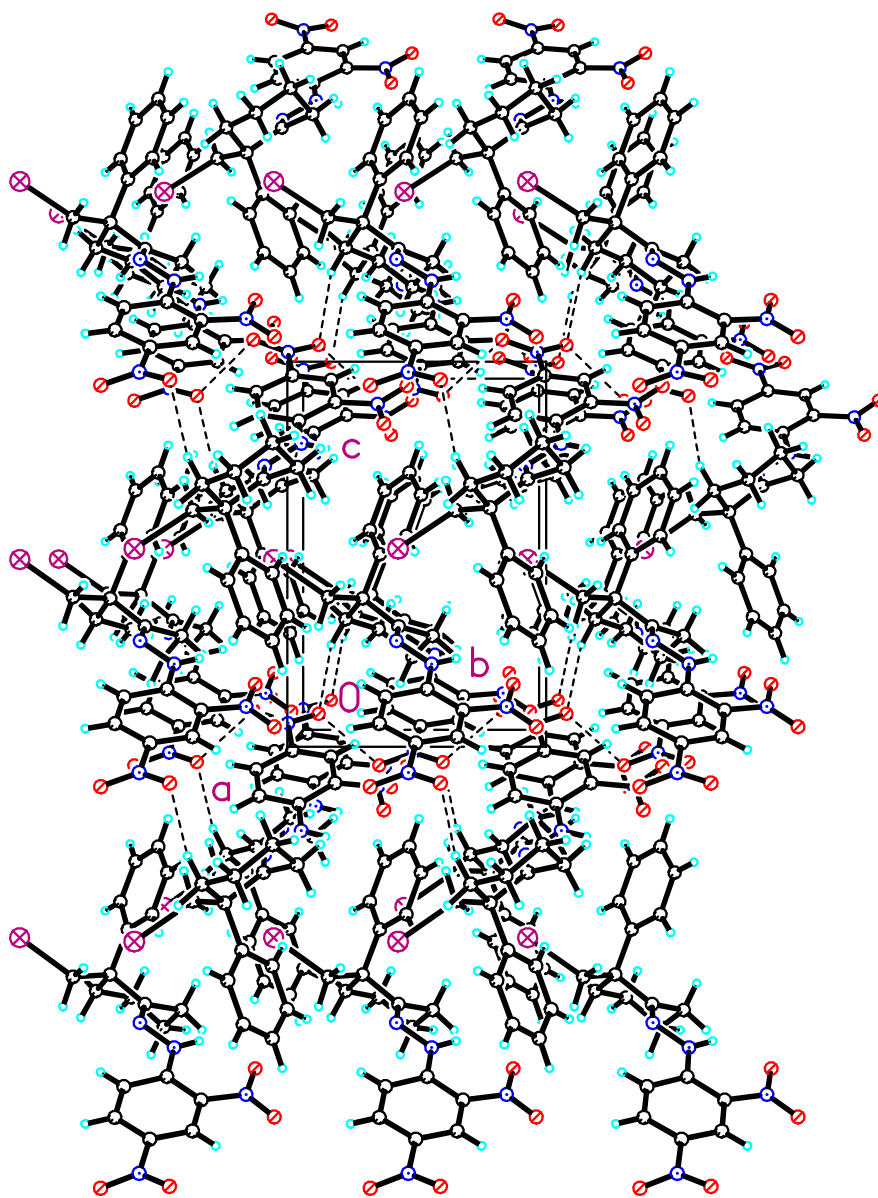

Figure S6. X-ray crystallography of 4
